# Supplementary material
Source: PubMed Central journal article supplement (PMC5677758)

---

# Supporting Information

---

## A Fluorescence Polarization Activity-Based Protein Profiling Assay in the Discovery of Potent, Selective Inhibitors for Human Non-lysosomal Glucosylceramidase

Daniël Lahav, Bing Liu, Richard J. B. H. N. van den Berg, Adrianus M. C. H. van den Nieuwendijk, Tom Wennekes, Amar T. Ghisaidoobe, Imogen Breen, Maria J. Ferraz, Chi-Lin Kuo, Liang Wu, Paul P. Geurink, Huib Ovaa, Gijsbert A. van der Marel, Mario van der Stelt, Rolf G. Boot, Gideon J. Davies, Johannes M. F. G. Aerts and Herman S. Overkleeft

### Contents

|                                                                                              |     |
|----------------------------------------------------------------------------------------------|-----|
| S1. Chemistry - General Information .....                                                    | S2  |
| S2. Synthesis and Characterization of ABP <b>4</b> .....                                     | S3  |
| S3. Synthetic Procedure and Spectral Data of Second Generation Deoxynojirimycins.....        | S7  |
| <i>Synthesis of D-gluco and L-ido Deoxynojirimycins</i> .....                                | S7  |
| <i>Synthesis of the Bromide-spacers</i> .....                                                | S9  |
| <i>Synthesis of the Alkylated Iminosugars</i> .....                                          | S17 |
| S4. Synthetic Procedure and Spectral Data of Iminosugar Library Compounds .....              | S22 |
| S5 Additional Biochemical Data for ABP <b>4</b> .....                                        | S72 |
| <i>Prolonged Imaging Experiment</i> .....                                                    | S72 |
| <i>Potency and Selectivity of ABP 4</i> .....                                                | S72 |
| S6 FluoPol-ABPP - pH Experiments on Established Competitors .....                            | S73 |
| S7 FluoPol-ABPP Screen of the Iminosugar Library - Categorized based on Configuration.....   | S74 |
| S8 Potency and Selectivity Assessment for D-gluco- and L-ido-deoxynojirimycins .....         | S75 |
| <i>Iminosugar Library</i> .....                                                              | S75 |
| <i>Second Generation Library</i> .....                                                       | S78 |
| S9 Crystallography .....                                                                     | S79 |
| <i>Gene Expression and Protein Purification for TxGH116</i> .....                            | S79 |
| <i>Crystallization, Structure Solution and Refinement of TxGH116 in Complex with 5</i> ..... | S79 |
| <i>Accessibility of TxGH116 Binding Pocket</i> .....                                         | S80 |
| References .....                                                                             | S81 |
| Appendix: Copies of <sup>1</sup> H and <sup>13</sup> C NMR Spectra.....                      | S82 |

## S1. Chemistry - General Information

### Chemicals, materials and methods

All solvents and reagents were obtained commercially and used as received unless stated otherwise. Dichloromethane (DCM), dimethylformamide (DMF), tetrahydrofuran (THF) and methanol (MeOH) were dried over molecular sieves (4Å/3Å) for at least 12 hours before use. Moisture sensitive reactions were performed under argon atmosphere and carried out in oven dried glassware. Reactions were monitored by TLC analysis using sheets with pre-coated silica with detection by UV-absorption (254 nm) wherever applicable and by spraying with 20% H<sub>2</sub>SO<sub>4</sub> in MeOH, an aqueous solution containing KMnO<sub>4</sub> (5 g/L) and K<sub>2</sub>CO<sub>3</sub> (95 g/L) or a solution of ninhydrine (6 g/L) in AcOH:MeOH (1:9, v/v) followed by charring at ≈ 200°C. Flash column chromatography was performed on silica gel (40-63 μm). For LC/MS analysis a HPLC-system (detection simultaneously at 213 nm, 254 nm and evaporative light detection) equipped with an analytical C-18 column (4.6 mmD × 250 mmL, 5 μm particle size) in combination with buffers A: H<sub>2</sub>O, B: acetonitrile, C: 1.0% aqueous trifluoroacetic acid and coupled with an electrospray interface (ESI) was used. For RP-HPLC purifications, an automated HPLC system equipped with a semi-preparative S2 C18 column (5 μm C18, 10Å, 150 × 21.2 mm) was used. The applied buffers were A: H<sub>2</sub>O + trifluoroacetic acid (1%) and B: MeCN. HPLC-MS purification was performed on an Agilent Technologies 1200 series automated HPLC system with a Quadropole MS 6130, equipped with a semi-preparative Gemini C18 column (Phenomex, 250 × 10, 5 μm) using buffers A: H<sub>2</sub>O + K<sub>2</sub>CO<sub>3</sub> (1%) and B: MeCN. Compounds are characterized by <sup>1</sup>H NMR, <sup>13</sup>C NMR, COSY and HSQC NMR experiments. NMR spectra were recorded on a Bruker DPX-300, DMX-400, AV-400, AV-600 and AV-850 spectrometer in mentioned solvent. Chemical shifts are given in ppm (δ) relative to tetramethylsilane or the deuterated solvent as the internal standard. High resolution mass spectra were recorded by direct injection (2 μL of a 2 μM solution in water/acetonitrile/*tert*-butanol, 1:1:1, v/v) on a mass spectrometer (Thermo Finnigan LTQ Orbitrap) equipped with an electrospray ion source with resolution R = 60000 at m/z 400 (mass range m/z = 150-2000). IR spectra were recorded on a Shimadzu FTIR-8300 fitted with a single bounce Durasample IR diamond crystal ATR-element and are reported in cm<sup>-1</sup>. Optical rotation were measured on an automatic polarimeter of sodium D-line, at λ = 589 nm. Size-exclusion purifications were performed on an ÄKTA-explorer provided by GE-Healthcare (polymere HW-40S from Toyopearl. The column used, had a d = 26 mm; l = 60 mm and the eluents used was NH<sub>4</sub>HCO<sub>3</sub> (0.15 M) in H<sub>2</sub>O, with a flow of 1.5 mL/min.

## S2. Synthesis and Characterization of ABP 4

Reaction between dimethylaminophenol **A1** and trimellitic anhydride **A2** in acetic acid as solvent using a catalytic amount of sulfuric acid produced stereoisomers **A3** and **A4**. Synthesis of the polyethylene-glycol-(PEG)-linker was obtained from di-alcohol **A5** through subsequent mesylation, azide formation, and (selective) reductive amination. Overall yield for the synthesis of linker **A8** was 33% over three steps. **A8** was attached to stereoisomers **A3** and **A4** in the presence of BOP.PF<sub>6</sub> and *N,N*-diisopropylethylamine (DIPEA), affording a mixture containing **A9** and **A10**. Desired product **A10**, 5-TAMRA-PEG3-azide, was isolated (2%) using HPLC (scheme S1).

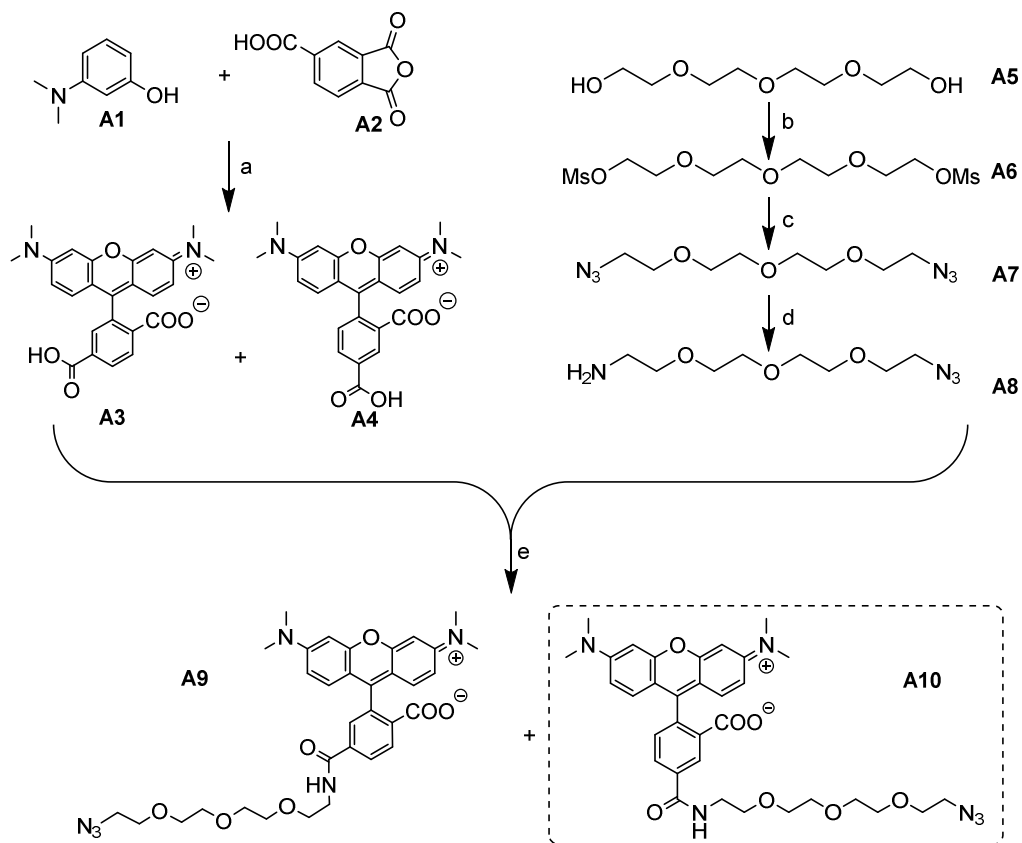

**Scheme S1:** Synthesis of 5-TAMRA-PEG3-azide [a] cat. H<sub>2</sub>SO<sub>4</sub> in AcOH under reflux; [b] MsCl, Et<sub>3</sub>N in THF, 45%; [c] NaN<sub>3</sub> in DMF under reflux, 95%; [d] PPh<sub>3</sub> in 5% HCl (aq), 77%; [e] BOP.PF<sub>6</sub>, DIPEA in DMSO, 2% over two steps

Synthesis of gluco-aziridine **A11** from the D-xylose was afforded according to experimental procedures described by Madsen et al.<sup>1</sup> and Kallemeijn et al.<sup>2</sup> Crude aziridine **A11** was alkylated using iodo-pentyne and sodium bicarbonate. Copper(I)-catalyzed azide-alkyne cycloaddition of 5-TAMRA-PEG3-azide **A10** with **A12** provided “**ABP 4**” (scheme S2).

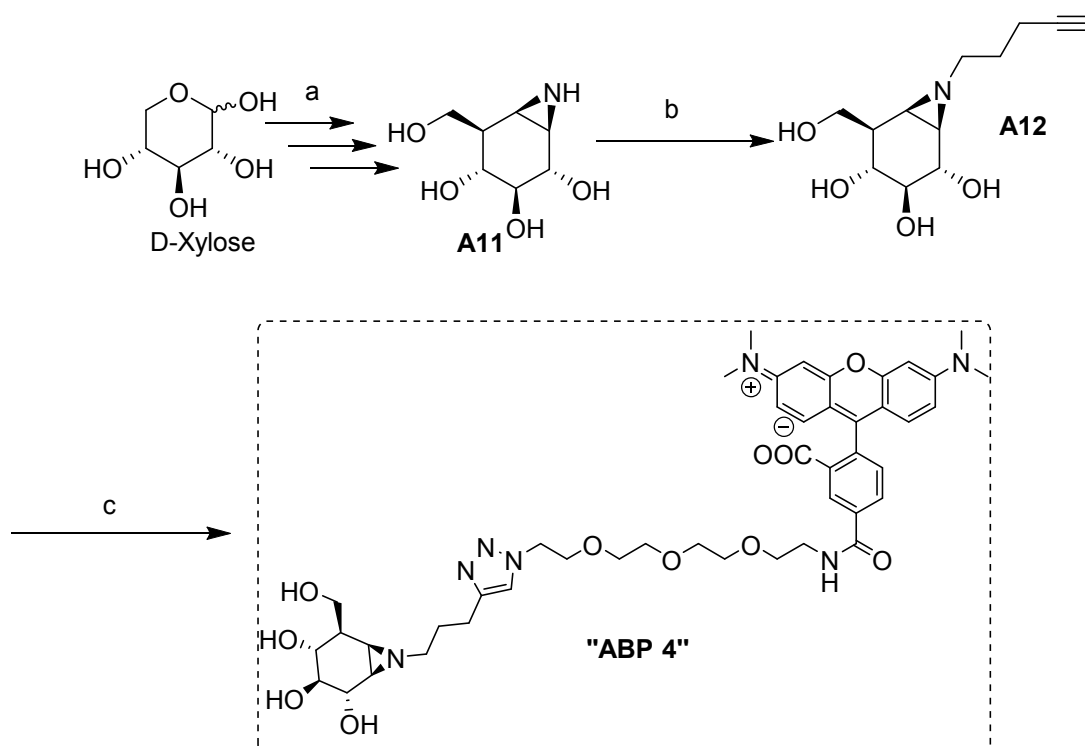

**Scheme S2:** Synthetic route towards gluco-cyclophellitol aziridine-type **ABP4**, [a] synthesis of **A11** described in references 1 and 2; [b] 5-iodo-pentyne, NaHCO<sub>3</sub> in DMF; [c] **A10**, sodium ascorbate, CuSO<sub>4</sub> in H<sub>2</sub>O, 6% over three steps

**((oxybis(ethane-2,1-diyl))bis(oxy))bis(ethane-2,1-diyl) dimethanesulfonate (**A6**)**

A mixture of triethylamine (11.2 g, 110 mmol, 2.2 eq.) in THF (10 mL) was added dropwisely at 0°C into a mixture containing tetra-ethylene glycol (9.7 g, 50 mmol) and mesylchloride (12.6 g, 110 mmol, 2.2 eq.) dissolved in dry THF (50 mL). After 30 minutes the cooling bath was removed and the reaction was stirred for 4 more hours at ambient temperature. THF was removed under reduced pressure. Subsequently a mixture H<sub>2</sub>O (100 mL), aqueous HCl (100 mL, 1 M) and DCM (200 mL) was poured into the residue. The organic layer was washed with saturated bicarbonate (3 × 100 mL), dried with MgSO<sub>4</sub> and filtrated. Purification via flash column chromatography (DCM → 5% MeOH/DCM) afforded **A6** (7.943 g, 22.62 mmol, 45%) as a brown oil. <sup>1</sup>H NMR (300 MHz, CDCl<sub>3</sub>) δ 4.27 - 4.14 (m, 4H), 3.66 - 3.57 (m, 4H), 3.50 (s, 8H), 2.93 (s, 6H). <sup>13</sup>C NMR (75 MHz, CDCl<sub>3</sub>) δ 70.1, 69.3, 68.5, 37.1. HRMS: found 351.0773 [M+H]<sup>+</sup>, calculated for [C<sub>10</sub>H<sub>22</sub>O<sub>9</sub>S<sub>2</sub>+H]<sup>+</sup> 351.0778.

**1-azido-2-(2-(2-(2-azidoethoxy)ethoxy)ethoxy)ethane (**A7**)**

A mixture of **A6** (7.1 g, 20 mmol) with sodium azide (5.3 g, 82 mmol, 4 eq.) in absolute ethanol (40 mL) and DMF (10 mL) was refluxed overnight. This mixture was poured into a mixture of H<sub>2</sub>O/DCM (200 mL, 1:1, v/v). The organic layer was washed subsequently with H<sub>2</sub>O (3 × 100 mL) and brine (3 × 100 mL). The organic layer was dried over MgSO<sub>4</sub> and filtered. A yellow oil (4.7 g, 19 mmol, 95%) was obtained after removing the solvents under reduced pressure. R<sub>F</sub> = 0.85 (MeOH:DCM, 1:9, v/v). <sup>1</sup>H NMR (300

MHz, CDCl<sub>3</sub>) δ 3.62 - 3.54 (m, 12H), 3.36 - 3.23 (m, 4H). <sup>13</sup>C NMR (75 MHz, CDCl<sub>3</sub>) δ 70.6, 70.0, 50.6. HRMS: found 245.1358 [M+H]<sup>+</sup>, calculated for [C<sub>8</sub>H<sub>16</sub>O<sub>3</sub>N<sub>6</sub>+H]<sup>+</sup> 245.1357.

**1-azido-2-(2-(2-(2-azidoethoxy)ethoxy)ethoxy)ethane (A8)**

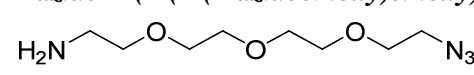 Triphenylphosphine (0.8 g, 3 mmol, 0.9 eq.) dissolved in ether (15 mL) was added into a solution of **A7** (0.8 g, 3.3 mmol) in 5% aqueous HCl (10 mL). Addition was performed in 30 minutes at room temperature and the reaction was stirred for an additional 2.5 hours. Phases were separated using a separation funnel and the aqueous layer was washed using DCM (3 × 25 mL). The aqueous layer was adjusted to pH 10 using KOH pellets. Product was extracted with DCM (4 × 50 mL). Combined organic layers were dried over MgSO<sub>4</sub> and filtered. After removal of the organic solvents under reduced pressure a yellow oil (4.7 g, 19 mmol, 77%) was afforded. *R*<sub>F</sub> = 0.2 (MeOH:DCM, 1:9, v/v). <sup>1</sup>H NMR (300 MHz, CDCl<sub>3</sub>) δ 3.73 - 3.49 (m, 10H), 3.45 (t, *J* = 5.2 Hz, 2H), 3.36 - 3.28 (m, 2H), 2.80 (t, *J* = 5.1 Hz, 2H), 1.44 (s, 2H). <sup>13</sup>C NMR (75 MHz, D<sub>2</sub>O) δ 73.5, 70.7 - 70.1, 50.8, 41.9. HRMS: found 219.1452 [M+H]<sup>+</sup>, calculated for [C<sub>8</sub>H<sub>16</sub>O<sub>3</sub>N<sub>4</sub>+H]<sup>+</sup> 219.1452.

**5-carboxy-2-(6-(dimethylamino)-3-(dimethyliminio)-3H-xanthen-9-yl)benzoate (A3& A4)**

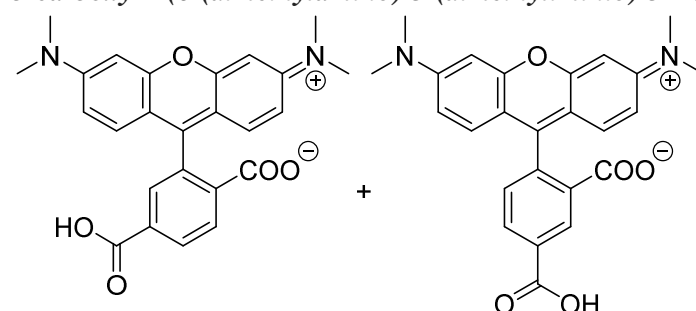 Dimethylaminophenol (6.9 g, 50 mmol) and trimellitic anhydride (4.8 g, 25 mmol) were dissolved in AcOH (400 mL). After adding a catalytic amounts of concentrated H<sub>2</sub>SO<sub>4</sub> (ca. 0.5 mL) the mixture was refluxed overnight. Reaction mixture was concentrated under reduced pressure and pre-purified over column chromatography (DCM → 50% MeOH/DCM) to isolate 2.7 g of a mixture containing desired of regio-isomers.

**2-(6-(dimethylamino)-3-(dimethyliminio)-3H-xanthen-9-yl)-5-((2-(2-(2-(2-(4-(3-((1*R*,2*S*,3*S*,4*R*,5*R*,6*R*)-2,3,4-trihydroxy-5-(hydroxymethyl)-7-azabicyclo[4.1.0]heptan-7-yl)propyl)-1*H*-1,2,3-triazol-1-yl)ethoxy)-ethoxy)ethoxy)-ethyl)carbamoyl)benzoate (A10)**

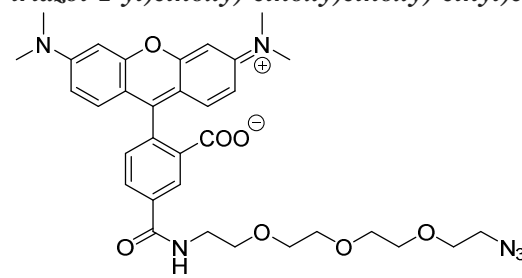 BOP.PF6 (74 mg, 0.168 mmol) and DIPEA (54 μL, 0.31 mmol) were added into a mixture containing isomers **A3** and **A4** (60 mg) and linker **A8** (30 mg, 0.14 mmol) dissolved in DMSO (2 mL). The reaction was stirred for 24 hours at ambient temperature. Desired stereoisomeric product **A10** (7.41 mg, 11.7 μmol, 2% estimated yield over two steps) was isolated using HPLC purification. <sup>1</sup>H NMR (600 MHz, MeOD) δ 8.79 (d, *J* = 1.7 Hz, 1H), 8.31 - 8.25 (m, 1H), 7.54 (d, *J* = 7.9 Hz, 1H), 7.15 (d, *J* = 9.5 Hz, 2H), 7.07 (dd, *J* = 9.5, 2.5 Hz, 2H), 7.00 (d, *J* = 2.4 Hz, 2H), 3.77 - 3.60 (m, 14H), 3.35 - 3.33 (m, 2H), 3.32 (s, 12H). <sup>13</sup>C NMR (150 MHz, MeOD) δ 168.6, 167.7, 161.0, 159.4, 159.3, 138.4, 138.0, 133.2, 132.7, 132.2, 132.2, 131.7, 115.9, 115.0, 97.8, 72.0 - 70.8, 52.0, 49.9, 41.5, 41.2. HRMS: found 631.2877 [M+H]<sup>+</sup>, calculated for [C<sub>33</sub>H<sub>38</sub>O<sub>7</sub>N<sub>6</sub>+H]<sup>+</sup> 631.2875.

**2-(6-(dimethylamino)-3-(dimethyliminio)-3H-xanthen-9-yl)-5-((2-(2-(2-(2-(4-(3-((1R,2S,3S,4R,5R,6R)-2,3,4-trihydroxy-5-(hydroxymethyl)-7-azabicyclo[4.1.0]heptan-7-yl)propyl)-1H-1,2,3-triazol-1-yl)ethoxy)ethoxy)ethoxy)ethyl)carbamoyl)benzoate (ABP4)**

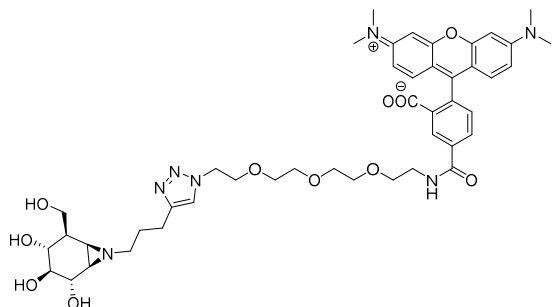

Sodium bicarbonate (4.8 mg, 57  $\mu\text{mol}$ ) and iodo-pentyne (2.9 mg, 15  $\mu\text{mol}$ ) were added into a roundbottomflask containing crude aziridine **A11** (5 mg) dissolved in dry DMF (0.5 mL). The reaction was stirred for 24h at ca. 60°C. The volatiles were removed under reduced pressure, the residue was dissolved in water (10 mL) and washed with DCM (3  $\times$  10 mL) and EtOAc (3  $\times$  10 mL). The aqueous layer was concentrated under reduced pressure. The residue containing compound **A12** was redissolved in H<sub>2</sub>O

(0.5 mL). Sodium ascorbate and CuSO<sub>4</sub> (5  $\mu\text{L}$  of 1 M solution) were added into the aqueous solution containing **A12**. After the mixture turned yellow-green TAMRA **A10** (1.25 mg, 1.98  $\mu\text{mol}$  dissolved in 1.5 mL H<sub>2</sub>O) was added. The reaction was completed after 3 days according to LC/MS analysis. Solvents were evaporated and product **ABP4** (1.457 mg, 1.670  $\mu\text{mol}$ , 6% yield over three steps) was isolated as a purple solid after HPLC-purification.  $R_F = 0.1$  (MeOH:DCM, 1:3, v/v). <sup>1</sup>H NMR (600 MHz, MeOD)  $\delta$  8.56 (s, 1H), 8.07 (d,  $J = 7.9$  Hz, 1H), 7.81 (s, 1H), 7.38 (d,  $J = 7.9$  Hz, 1H), 7.26 (d,  $J = 9.5$  Hz, 2H), 7.04 (d,  $J = 9.5$  Hz, 2H), 6.96 (s, 2H), 4.60 (s, 2H), 4.52 (t,  $J = 5.1$  Hz, 2H), 4.00 (dd,  $J = 10.1, 4.4$  Hz, 1H), 3.88 (t,  $J = 5.1$  Hz, 2H), 3.74 (t,  $J = 5.3$  Hz, 2H), 3.72 - 3.60 (m, 14H), 3.31 (d,  $J = 3.7$  Hz, 12H), 3.12 (dd,  $J = 9.9, 8.2$  Hz, 1H), 3.03 (t,  $J = 9.8$  Hz, 1H), 2.81 - 2.71 (m, 2H), 2.45 - 2.37 (m, 1H), 2.24 - 2.16 (m, 1H), 2.03 - 1.99 (m, 1H), 1.96 - 1.85 (m, 3H), 1.61 (d,  $J = 12.0$  Hz, 1H). <sup>13</sup>C NMR (150 MHz, MeOD)  $\delta$  169.2, 169.0, 162.9, 159.0, 158.7, 137.0, 136.9, 132.8, 132.6, 130.8, 129.5, 129.5, 124.1, 115.0, 114.8, 102.0, 97.3, 79.0, 74.0, 71.6 - 70.4, 70.14, 63.7, 61.2, 51.3, 49.8, 49.6, 45.5, 45.5, 43.1, 41.2, 40.8, 30.2, 24.1. HRMS: found 872.4184 [M+H]<sup>+</sup>, calculated for [C<sub>45</sub>H<sub>57</sub>O<sub>11</sub>N<sub>7</sub>+H]<sup>+</sup> 872.4189.

### S3. Synthetic Procedure and Spectral Data of Second Generation Deoxynojirimycins

#### Synthesis of *D*-gluco and *L*-ido Deoxynojirimycins

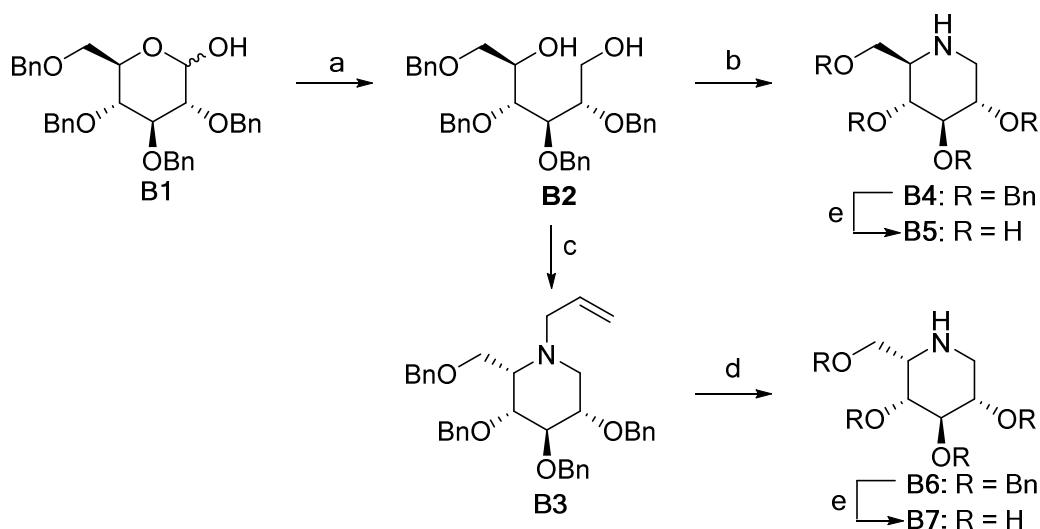

**Scheme S3:** Synthesis of 1-deoxynojirimycin and *L*-ido-1-deoxynojirimycin [a]  $\text{LiAlH}_4$ , THF; [b]  $(\text{COCl})_2$ , DMSO, DCM,  $\text{CHOONH}_4$ ,  $\text{Na}_2\text{SO}_4$ ,  $\text{NaBH}_3\text{CN}$ , MeOH, 12% 2 steps; [c]  $\text{MsCl}$ , pyridine, allyl amine, reflux, 78% 2 steps; [d]  $\text{KOtBu}$ , DMSO, HCl, 92%; [e]  $\text{Pd/C}$ ,  $\text{H}_2$ , 82% (**B5**), 76% (**B7**).

#### 2,3,4,6-Tetra-*O*-benzyl-1-deoxynojirimycin (**B4**)

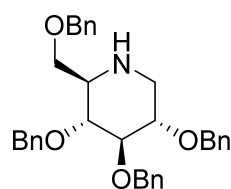

A solution of  $(\text{COCl})_2$  (0.70 mL, 8.16 mmol) in dry DCM (5 mL) under argon atmosphere, was cooled to  $-78^\circ\text{C}$ . DMSO (0.71 mL, 10.0 mmol) dissolved in dry DCM (5 mL) was added dropwise. After 40 minutes **B2** (1.02 g, 1.88 mmol), which was co-evaporated 3 times with toluene, in dry DCM (3 mL), was added dropwise to the mixture. The reaction was stirred for 2 hours at  $-78^\circ\text{C}$ , after which  $\text{Et}_3\text{N}$  (3.40 mL, 24.4 mmol) was added dropwise to quench the reaction.

The mixture was gradually warmed to  $-5^\circ\text{C}$  after which it was poured into a cooled ( $0^\circ\text{C}$ ) MeOH solution (50 mL) of  $\text{NaCNBH}_3$  (0.503 g, 8.00 mmol),  $\text{HCOONH}_4$  (2.53 g, 40.1 mmol), and  $\text{Na}_2\text{SO}_4$  (0.887 g, 6.24 mmol). The mixture was stirred overnight allowing the temperature to reach rt. TLC analysis showed complete consumption of the starting material (PE:EtOAc = 1:1,  $R_F$  = 0.36). After filtration, the solvent was evaporated, as the residue was dissolved in EtOAc (70 mL), washed with sat aq.  $\text{NaHCO}_3$  solution (70 mL). The organic layer was dried over  $\text{Na}_2\text{SO}_4$  and after filtration and concentration, the residue was purified with silica gel column (2:1  $\rightarrow$  1:2, PE:EtOAc) to give the pure product **B4** in 12% overall yield (0.114 g, 0.218 mmol).  $R_F$  = 0.36 (1:1, PE:EtOAc).  $^1\text{H}$  NMR (400 MHz,  $\text{CDCl}_3$ )  $\delta$  7.53 - 7.22 (m, 20H), 5.09 (d,  $J$  = 10.9 Hz, 1H), 4.96 (t,  $J$  = 10.4 Hz, 2H), 4.82 - 4.72 (m, 2H), 4.65 - 4.48 (m, 3H), 3.77 (dd,  $J$  = 9.0, 2.6 Hz, 1H), 3.71 - 3.56 (m, 3H), 3.47 (t,  $J$  = 9.2 Hz, 1H), 3.35 (dd,  $J$  = 12.3, 4.9 Hz, 1H), 2.83 (ddd,  $J$  = 9.8, 5.8, 2.6 Hz, 1H), 2.61 (dd,  $J$  = 12.3, 10.2 Hz, 1H).  $^{13}\text{C}$  NMR (100 MHz,  $\text{CDCl}_3$ )  $\delta$  138.9, 138.5, 138.4, 138.0, 128.4, 128.4, 128.4, 128.4, 128.0, 128.0, 127.9, 127.8, 127.8, 127.7, 127.7, 127.5, 87.3, 80.6, 80.1, 75.7, 75.2, 73.4, 72.8, 70.2, 59.7, 48.1.

#### 1-deoxynojirimycin (**B5**)

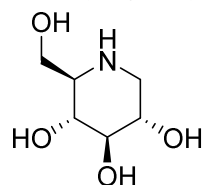

**B4** (2.00 g, 3.82 mmol) was dissolved in EtOH (120 mL) and pH was adjusted to 2 with HCl solution (1 M). The solution was flushed with argon for 3 times, after which two spatula tips of  $\text{Pd/C}$  (20%) was added. Then the solution was exposed to

H<sub>2</sub> atmosphere (4 bar) for 24 hours. The product was purified on silica gel column (4:1, EtOAc:MeOH + 1% NH<sub>4</sub>OH → 6:4:1, EtOH:H<sub>2</sub>O:NH<sub>4</sub>OH) to give the **B5** in 82% yield (511 mg, 3.13 mmol). <sup>1</sup>H NMR (400 MHz, MeOD) δ 3.92 (dd, *J* = 10.9, 3.1 Hz, 1H), 3.68 (dd, *J* = 10.9, 6.5 Hz, 1H), 3.57 - 3.44 (m, 1H), 3.34 - 3.21 (m, 2H), 3.18 (dd, *J* = 12.1, 5.1 Hz, 1H), 2.68 - 2.42 (m, 2H). <sup>13</sup>C NMR (100 MHz, MeOD) δ 81.5, 74.2, 73.4, 63.9, 63.7, 51.9.

### 2,3,4,6-Tetra-*O*-benzyl-*L*-ido-*N*-allyl-1-deoxynojimycin (**B3**)

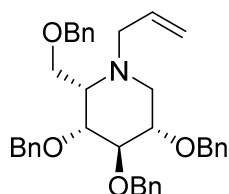

MsCl (4.2 mL, 53.1 mmol) was added dropwise to a cooled solution (0°C) of pyridine (90 mL) and **B2** (11.5 g, 21.2 mmol) was kept under argon atmosphere. The mixture was stirred for 3 hours at r.t., after which TLC analysis (2:1, PE:EtOAc, *R<sub>F</sub>* = 0.13) showed complete consumption of the starting material. Water (60 mL) was added and the solution was concentrated. Then after adding EtOAc (130 mL) it was washed with HCl (100 mL, 1M, 2 times), sat. aq. NaHCO<sub>3</sub> (100 mL) and brine (100 mL) successively. The organic layer was dried (Na<sub>2</sub>SO<sub>4</sub>), filtered and concentrated, and then it was co-evaporated 3 times with toluene. Allylamine (90 mL) was added to dissolve the methanesulfonylated product, and the solution was heated to reflux for 14 hours. The reaction was then stirred for 2 more hours at rt until TLC analysis (2:1, PE:EtOAc) showed complete consumption of the starting material. After concentrating, EtOAc (110 mL) was added and was washed with sat aq. NaHCO<sub>3</sub> (100 mL, 2 ×) and brine (100 mL). The organic layer was dried on Na<sub>2</sub>SO<sub>4</sub> and after filtering and concentrating, the residue was purified on silica gel column (17:3, PE:EtOAc) to give **B3** in 78% yield (9.30 g, 16.5 mmol). *R<sub>F</sub>* = 0.76 (2:1, PE:EtOAc). <sup>1</sup>H NMR (400 MHz, CDCl<sub>3</sub>) δ 7.33 - 7.23 (m, 20H), 5.77 (ddt, *J* = 16.8, 10.3, 6.3 Hz, 1H), 5.12 (dd, *J* = 23.6, 6.2 Hz, 2H), 4.90 - 4.46 (m, 8H), 3.84 (dd, *J* = 10.2, 6.8 Hz, 1H), 3.72 (dd, *J* = 10.2, 2.5 Hz, 1H), 3.69 (dd, *J* = 7.6, 4.2 Hz, 1H), 3.60 - 3.50 (m, 2H), 3.42 (ddd, *J* = 10.1, 5.8, 1.6 Hz, 1H), 3.37 (dd, *J* = 6.9, 2.0 Hz, 1H), 3.18 (dd, *J* = 14.1, 6.9 Hz, 1H), 2.92 (dd, *J* = 11.9, 4.9 Hz, 1H), 2.53 (dd, *J* = 11.8, 9.8 Hz, 1H). <sup>13</sup>C NMR (100 MHz, CDCl<sub>3</sub>) δ 139.3, 138.8, 138.7, 138.6, 136.3, 128.5, 117.2, 83.1, 80.3, 78.9, 75.5, 73.4, 73.1, 72.8, 64.8, 60.1, 58.1, 49.2.

### 2,3,4,6-Tetra-*O*-benzyl-*L*-ido-1-deoxynojirimycin (**B6**)

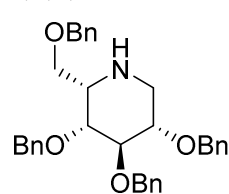

A mixture of DMSO (35 mL), tBuOK (1.00 g, 8.91 mmol) and **B3** (9.30 g, 16.5 mmol), which was co-evaporated 3 times with toluene, were stirred and heated to 100°C under argon atmosphere. After 1 hour stirring, HCL solution (30 mL, 1M) was added and the heating resource was removed. After 30 minutes, the mixture was poured into sat aq. NaHCO<sub>3</sub> (100 mL). Sat aq. NaHCO<sub>3</sub> (200 mL) and Et<sub>2</sub>O (150 mL) was added to the reaction mixture and the organic layer were separated. The water layer was re-extracted with Et<sub>2</sub>O (150 mL, 2 ×) and the combined organic layers were dried (Na<sub>2</sub>SO<sub>4</sub>) filtered and concentrated. The residue was purified with silica gel column (2:1 → 1:2 → 0:1, PE:EtOAc) to give the pure product **B6** with a yield of 92% (7.93 g, 15.1 mmol). *R<sub>F</sub>* = 0.13 (1:1, PE:EtOAc). <sup>1</sup>H NMR (400 MHz, CDCl<sub>3</sub>) δ 7.54 - 7.17 (m, 20H), 4.69 - 4.43 (m, 8H), 3.82 (t, *J* = 5.2 Hz, 1H), 3.69 - 3.54 (m, 3H), 3.50 (q, *J* = 4.7 Hz, 1H), 3.31 (td, *J* = 6.8, 3.6 Hz, 1H), 3.01 (dd, *J* = 13.5, 3.6 Hz, 1H), 2.94 (dd, *J* = 13.5, 5.1 Hz, 1H). <sup>13</sup>C NMR (100 MHz, CDCl<sub>3</sub>) δ 140.7, 140.6, 140.5, 140.4, 130.3, 130.2, 130.1, 129.9, 129.8, 129.6, 129.6, 129.5, 77.6, 77.0, 75.3, 75.1, 74.4, 73.6, 56.4, 46.4.

### *L*-Ido-1-deoxynojimycin (**B7**)

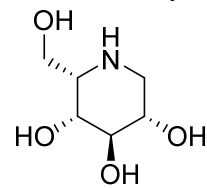

**B6** (2.30 g, 4.39 mmol) was dissolved in EtOH (150 mL) and pH was adjusted to 2 with HCl solution (1 M). The solution was flushed with argon for 3 times, after which two spatula tips of Pd/C (20%) was added. Then the solution was exposed to H<sub>2</sub> atmosphere (4 bar) for 24 hours. The product was purified with silica gel column (4:1, EtOAc:MeOH + 1% NH<sub>4</sub>OH → 6:4:1, EtOH:H<sub>2</sub>O:NH<sub>4</sub>OH) to give the **B7** in 76% yield (840 mg, 3.32 mmol). <sup>1</sup>H NMR (400 MHz, MeOD) δ 3.94 (ddd, *J* = 6.5, 3.9, 2.6 Hz, 2H), 3.89 (dd, *J* = 5.7, 2.0 Hz, 1H), 3.85 (dd, *J* = 11.0, 2.1 Hz, 1H), 3.81 (dd, *J* = 11.7, 5.1 Hz, 1H), 3.51 (ddd, *J* = 8.9, 5.0, 1.9 Hz, 1H), 3.41 (dd, *J* = 13.2, 2.0 Hz, 1H), 3.27 (dd, *J* = 13.2, 1.7 Hz, 1H). <sup>13</sup>C NMR (100 MHz, MeOD) δ 70.1, 69.2, 68.7, 61.5, 59.1, 47.9.





2H), 1.44 (ddd,  $J = 8.9, 7.5, 4.3$  Hz, 2H), 0.90 (s, 3H), 0.88 (s, 3H).  $^{13}\text{C}$  NMR (100 MHz,  $\text{CDCl}_3$ )  $\delta$  144.6, 128.8, 127.7, 126.9, 86.4, 77.9, 71.0, 63.6, 30.0, 29.7, 28.5, 23.1, 19.5. IR/ $\text{cm}^{-1}$ : 3061, 2930, 2901, 2866, 1597, 1489, 1448, 1392, 1364, 1176, 1072, 902.

#### 5-(3,3-dimethyl-2-butoxy)-1-trityloxypentane (B15)

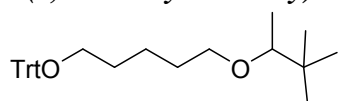

Compound **B10** (4.43 mmol) was subjected to general procedure A, using 3,3-dimethyl-2-butanol (5.06 mmol) to provide **B15** (0.95 g, 2.21 mmol) in a 50% yield, as thick oil, after silica gel column purification.  $R_F = 0.79$  (5% EtOAc in PE).  $^1\text{H}$  NMR (400 MHz,  $\text{CDCl}_3$ )  $\delta$  7.48 - 7.36 (m, 6H), 7.28 - 7.11 (m, 12H), 3.53 (dt,  $J = 9.4, 5.8$  Hz, 1Ha), 3.21 (dd,  $J = 9.2, 6.2$  Hz, 1H), 3.06 (t,  $J = 6.6$  Hz, 2H), 2.93 (q,  $J = 6.3$  Hz, 1H, H-6), 1.74 - 1.35 (m, 6H), 1.01 (d,  $J = 6.3$  Hz, 3H), 0.87 (s, 9H).  $^{13}\text{C}$  NMR (100 MHz,  $\text{CDCl}_3$ )  $\delta$  144.7, 129.1, 127.9, 127.0, 86.5, 83.4, 69.9, 63.8, 35.3, 30.3, 26.2, 23.4, 14.2. IR/ $\text{cm}^{-1}$ : 3059, 3022, 2936, 2866, 1597, 1489, 1448, 1389, 1362, 1219, 1090, 1072, 899.

#### 5-(3,3-dimethyl-1-butoxy)-1-trityloxypentane (B16)

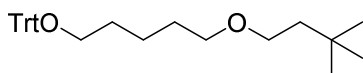

Compound **B10** (4.41 mmol) was subjected to general procedure A, using 3,3-dimethyl-1-butanol (5.07 mmol) to provide **B16** (1.02 g, 2.36 mmol) in a 54% yield, as thick oil, after silica gel column purification.  $R_F = 0.67$  (5% EtOAc in PE).  $^1\text{H}$  NMR (400 MHz,  $\text{CDCl}_3$ )  $\delta$  7.44 (dt,  $J = 8.3, 2.2$  Hz, 6H), 7.25 - 7.16 (m, 6H), 7.16 - 7.10 (m, 3H), 3.41 (t,  $J = 7.4$  Hz, 2H), 3.34 (t,  $J = 6.4$  Hz, 2H), 3.06 (td,  $J = 6.9, 3.0$  Hz, 2H), 1.63 (p,  $J = 6.8$  Hz, 2H), 1.52 (q,  $J = 7.2$  Hz, 4H), 1.48 - 1.38 (m, 2H), 0.90 (s, 9H).  $^{13}\text{C}$  NMR (100 MHz,  $\text{CDCl}_3$ )  $\delta$  144.7, 128.9, 127.9, 127.0, 71.0, 68.3, 63.7, 43.2, 30.1, 29.8, 23.3. IR/ $\text{cm}^{-1}$ : 3057, 3022, 2936, 2864, 1597, 1489, 1448, 1364, 1219, 1111, 1072, 899.

#### 5-(cyclopropylmethoxy)-1-trityloxypentane (B17)

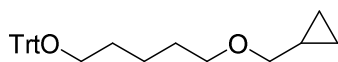

Compound **B10** (4.41 mmol) was subjected to general procedure A, using cyclopropylmethanol (5.02 mmol) to provide **B17** (0.10 g, 2.49 mmol) in a 56% yield, as thick oil, after silica gel column purification.  $R_F = 0.63$  (10% EtOAc in PE).  $^1\text{H}$  NMR (400 MHz,  $\text{CDCl}_3$ )  $\delta$  7.46 - 7.41 (m, 6H, Trt), 7.28 - 7.19 (m, 6H), 7.20 - 7.13 (m, 3H), 3.38 (t,  $J = 6.6$  Hz, 2H), 3.20 (d,  $J = 6.9$  Hz, 2H), 3.06 (t,  $J = 6.6$  Hz, 2H), 1.65 (p,  $J = 6.8$  Hz, 2H), 1.55 (dq,  $J = 8.9, 6.3$  Hz, 2H), 1.47 - 1.38 (m, 2H), 1.08 - 0.97 (m, 1H), 0.52 - 0.45 (m, 2H), 0.16 (dt,  $J = 6.0, 4.5$  Hz, 2H).  $^{13}\text{C}$  NMR (100 MHz,  $\text{CDCl}_3$ )  $\delta$  144.6, 128.8, 127.8, 126.9, 86.4, 75.7, 70.7, 63.7, 30.1, 29.8, 23.1, 10.9, 3.2. IR/ $\text{cm}^{-1}$ : 3082, 3057, 3022, 2933, 2862, 1732, 1597, 1489, 1448, 1382, 1219, 1087, 1074, 899.

#### 5-(cyclobutylmethoxy)-1-trityloxypentane (B18)

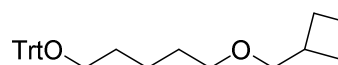

Compound **B10** (4.40 mmol) was subjected to general procedure A, using cyclobutylmethanol (5.01 mmol) to provide **B18** (0.79 g, 1.91 mmol) in a 43% yield, as thick oil, after silica gel column purification.  $R_F = 0.74$  (10% EtOAc in PE).  $^1\text{H}$  NMR (400 MHz,  $\text{CDCl}_3$ )  $\delta$  7.45 - 7.43 (m, 6H) 7.22 - 7.17 (m, 6H), 7.14 - 7.10 (m, 3H), 3.37 - 3.32 (m, 4H), 3.07 (t, 2H), 2.56 - 2.49 (m, 1H), 2.04 - 1.97 (m, 2H), 1.86 - 1.79 (m, 2H), 1.75 - 1.40 (m, 8H,  $\text{H}_2$ -2).  $^{13}\text{C}$  NMR (100 MHz,  $\text{CDCl}_3$ )  $\delta$  144.6, 128.8, 127.8, 126.9, 86.4, 75.5, 71.0, 63.6, 60.3, 35.3, 29.7, 25.2, 23.1, 18.8. IR/ $\text{cm}^{-1}$ : 3084, 3059, 2934, 2862, 1597, 1489, 1448, 1363, 1219, 1111, 1072, 898.

#### 5-(cyclopentylmethoxy)-1-trityloxypentane (B19)

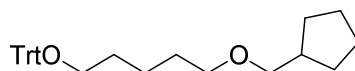

Compound **B10** (4.43 mmol) was subjected to general procedure A, using cyclopentylmethanol (5.09 mmol) to provide **B19** (1.29 g, 3.02 mmol) in a 68% yield, as thick oil after silica gel column purification.  $R_F = 0.77$  (10% EtOAc in PE).  $^1\text{H}$  NMR (400 MHz,  $\text{CDCl}_3$ )  $\delta$  7.44 (m, 6H), 7.18 - 7.06 (m, 9H), 3.39 - 3.29 (m, 2H), 3.21 (dd,  $J = 7.0, 1.0$  Hz, 2H), 3.05 (dt,  $J = 11.1, 6.5$  Hz, 2H), 2.10 (q,  $J = 7.4$  Hz, 1H), 1.74 - 1.57 (m, 4H), 1.57 - 1.36 (m, 8H), 1.31 - 1.17 (m, 2H).  $^{13}\text{C}$  NMR (100 MHz,  $\text{CDCl}_3$ )  $\delta$  144.4 -

125.6, 75.2, 70.6, 63.3, 38.4, 29.4, 28.7, 25.3, 25.1, 22.8. IR/cm<sup>-1</sup> : 3084, 3057, 3022, 2939, 2864, 1597, 1489, 1448, 1367, 1176, 1072.

#### 5-(thiophen-3-methoxy)-1-trityloxypentane (**B20**)

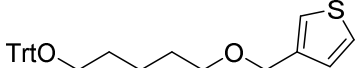 Compound **B10** (4.56 mmol) was subjected to general procedure A, using 3-thiophenmethanol (4.57 mmol) to provide **B20** (0.73 g, 2.13 mmol) in a 56% yield, as thick oil, after silica gel column purification.  $R_F = 0.79$  (15% EtOAc in PE). <sup>1</sup>H NMR (400 MHz, CDCl<sub>3</sub>) δ 7.45 - 7.38 (m, 6H), 7.28 - 7.20 (m, 6H), 7.20 - 7.14 (m, 3H), 7.12 (dq,  $J = 3.0, 1.0$  Hz, 1H), 7.04 (dd,  $J = 4.9, 1.3$  Hz, 1H), 7.02 (dd,  $J = 4.9, 1.3$  Hz, 1H), 4.44 (d,  $J = 0.8$  Hz, 2H), 3.40 (t,  $J = 6.5$  Hz, 2H), 3.05 (t,  $J = 6.6$  Hz, 2H), 1.70 - 1.49 (m, 4H), 1.51 - 1.36 (m, 2H). <sup>13</sup>C NMR (100 MHz, CDCl<sub>3</sub>) δ 144.6, 128.9, 127.9, 127.4, 127.0, 126.0, 122.6, 114.7, 86.5, 70.4, 68.3, 63.7, 30.0, 29.8, 23.1. IR/cm<sup>-1</sup> : 3501, 3088, 3059, 3024, 2938, 2864, 2316, 1734, 1448, 1364, 1242, 1068, 1034.

#### 5-(thiophen-3-ethoxy)-1-trityloxypentane (**B21**)

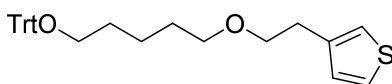 Compound **B10** (4.56 mmol) was subjected to general procedure A, using 3-thiophenethanol (4.57 mmol) to provide **B21** (0.97 g, 1.65 mmol) in a 47% yield as oil after silica gel column purification.  $R_F = 0.70$  (10% EtOAc in PE). <sup>1</sup>H NMR (400 MHz, CDCl<sub>3</sub>) δ 7.58 - 7.38 (m, 6H), 7.33 - 7.26 (m, 6H), 7.25 - 7.11 (m, 3H), 7.04 - 6.81 (m, 2H), 4.10 (q,  $J = 7.1$  Hz, 2H), 3.59 (t,  $J = 7.0$  Hz, 2H), 3.41 (t,  $J = 6.5$  Hz, 2H), 3.05 (t,  $J = 6.6$  Hz, 2H), 2.88 (t,  $J = 7.0$  Hz, 2H), 1.63 (q,  $J = 7.1$  Hz, 2H), 1.59 - 1.48 (m, 2H), 1.42 (qd,  $J = 7.3, 4.0$  Hz, 2H). <sup>13</sup>C NMR (100 MHz, CDCl<sub>3</sub>) δ 144.5, 128.8, 128.0, 127.8, 126.9, 125.2, 121.1, 114.6, 86.4, 71.1, 71.0, 63.6, 30.8, 29.9, 29.6, 23.0. IR/cm<sup>-1</sup> : 3524, 3086, 3057, 2934, 2862, 1738, 1717, 1489, 1447, 1387, 1364, 1242, 1159, 1113, 1069, 1034.

#### 5-(*R/S*-tetrahydrofuran-3-ylmethoxy)-1-trityloxypentane (**B11**)

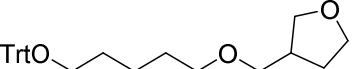 Compound **B10** (4.61 mmol) was subjected to General procedure A, using *R/S* tetrahydrofuran-3-ylmethanol (4.96 mmol) to provide **B11** (1.11 g, 2.58 mmol) in a 56% yield as oil after silica gel column purification.  $R_F = 0.40$  (15% EtOAc in PE). <sup>1</sup>H NMR (400 MHz, CDCl<sub>3</sub>) δ 7.48 - 7.40 (m, 6H), 7.21 (dd,  $J = 8.5, 6.8$  Hz, 6H), 7.16 - 7.10 (m, 3H), 3.75 (ddd,  $J = 12.1, 8.3, 6.2$  Hz, 2H), 3.68 - 3.55 (m, 1H), 3.53 (dd,  $J = 8.7, 5.4$  Hz, 1H), 3.40 - 3.18 (m, 4H), 3.07 (t,  $J = 6.5$  Hz, 2H), 2.49 - 2.35 (m, 1H), 1.87 (ddt,  $J = 13.9, 8.1, 4.0$  Hz, 1H), 1.62 (p,  $J = 6.8$  Hz, 2H), 1.51 (m, 3H), 1.46 - 1.37 (m, 2H). <sup>13</sup>C NMR (100 MHz, CDCl<sub>3</sub>) δ 144.6, 128.8, 127.0, 86.4, 73.0, 71.1, 71.1, 67.8, 39.4, 30.0, 29.6, 29.2, 23.1. IR/cm<sup>-1</sup> : 3445, 2934, 2866, 2347, 1716, 1489, 1448, 1339, 1163, 1074.

#### 5-(tetrahydro-2H-pyran-4-ylmethoxy)-1-trityloxypentane (**B22**)

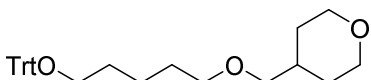 Compound **B10** (4.68 mmol) was subjected to general procedure A, using tetrahydro-2H-pyran-4-ylmethanol (4.34 mmol) to provide **B22** (0.79 g, 1.78 mmol) in a yield of 38% as oil after silica gel column purification.  $R_F = 0.48$  (15% EtOAc in PE). <sup>1</sup>H NMR (400 MHz, CDCl<sub>3</sub>) δ 7.50 - 7.38 (m, 6H), 7.29 - 7.12 (m, 11H), 3.90 (ddd,  $J = 11.5, 4.6, 1.8$  Hz, 2H), 3.39 - 3.26 (m, 4H), 3.20 (d,  $J = 6.5$  Hz, 2H), 3.06 (t,  $J = 6.5$  Hz, 2H), 1.89 - 1.71 (m, 1H), 1.70 - 1.57 (m, 4H), 1.57 - 1.47 (m, 2H), 1.47 - 1.38 (m, 2H), 1.35 - 1.25 (m, 2H). <sup>13</sup>C NMR (100 MHz, CDCl<sub>3</sub>) δ 144.5, 128.7, 127.7, 126.9, 86.4, 75.9, 71.1, 67.7, 63.5, 35.5, 30.1, 29.9, 29.6, 23.0. IR/cm<sup>-1</sup> : 3085, 3056, 3023, 2932, 2849, 1558, 1506, 1506, 1489, 1227, 1163, 1097.

#### 5-(*R/S*-tetrahydrofuran-1-ylmethoxy)-1-trityloxypentane (**B23**)

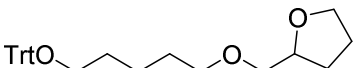 Compound **B10** (5.03 mmol) was subjected to general procedure A, using *R/S* tetrahydrofuran-1-ylmethanol (5.73 mmol) to provide **B23** (1.06 g, 2.46 mmol) in a yield of 49% as oil after silica gel column purification.  $R_F = 0.52$  (15% EtOAc in PE). <sup>1</sup>H NMR (400 MHz, CDCl<sub>3</sub>) δ 7.45 - 7.37 (m, 6H), 7.32 - 7.23 (m, 6H), 7.23 - 7.16 (m, 3H), 4.02 (tt,  $J = 7.3, 5.3$  Hz, 1H), 3.85 (ddd,  $J = 8.2, 6.9, 6.1$  Hz, 1H),

3.73 (ddd,  $J = 8.2, 7.2, 6.3$  Hz, 1H), 3.53 - 3.37 (m, 4H), 3.05 (t,  $J = 6.6$  Hz, 2H), 1.96 - 1.77 (m, 3H), 1.69 - 1.60 (m, 2H), 1.60 - 1.52 (m, 3H), 1.47 - 1.37 (m, 2H).  $^{13}\text{C}$  NMR (100 MHz,  $\text{CDCl}_3$ )  $\delta$  144.5, 128.7, 127.7, 126.9, 86.3, 77.9, 73.6, 71.6, 68.4, 63.6, 30.0, 29.6, 28.2, 25.7, 22.9. IR/ $\text{cm}^{-1}$ : 3084, 3055, 3022, 2934, 2862, 1597, 1489, 1448, 1373, 1219, 1111, 1074.

**General Procedure B: Deprotection of the trityl-group.** To a solution of alkyloxy-1-trityloxypentane (2.0 mmol) in toluene/MeOH (1:1, 20 mL, 0.1 M) was added  $\text{BF}_3 \cdot \text{Et}_2\text{O}$  (3.0 mmol, 1.5 eq). This mixture was stirred for 1.5 h at r.t. After completion of the starting material (TLC monitored), the mixture was diluted with EtOAc (30 mL) and washed with sat. aq.  $\text{NaHCO}_3$  (50 mL). The water layer was re-extracted with EtOAc ( $3 \times 30$  mL) and the combined organic layers were dried ( $\text{MgSO}_4$ ), filtered, concentrated and the residue purified by silica gel column chromatography (1:9  $\rightarrow$  1:4  $\rightarrow$  1:1  $\rightarrow$  1:0, EtOAc:PE) to give target alcohol chains.

#### 5-(2-methyl-1-propyloxy)-1-pentanol (B24)

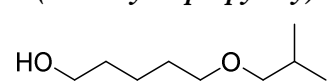 Compound **B14** (3.56 mmol) was subjected to general procedure B to provide **B24** (0.33 g, 2.07 mmol) in a yield of 73% as oil after silica gel column purification.  $R_F = 0.24$  (20% EtOAc in PE).  $^1\text{H}$  NMR (400 MHz,  $\text{CDCl}_3$ )  $\delta$  3.46 (t,  $J = 6.6$  Hz, 2H), 3.29 (t,  $J = 6.5$  Hz, 2H), 3.04 (d,  $J = 6.8$  Hz, 2H), 1.73 (dt,  $J = 13.4, 6.7$  Hz, 1H), 1.62 - 1.39 (m, 4H), 1.38 - 1.22 (m, 2H), 0.78 (d,  $J = 0.8$  Hz, 3H), 0.76 (d,  $J = 0.8$  Hz, 3H).  $^{13}\text{C}$  NMR (100 MHz,  $\text{CDCl}_3$ )  $\delta$  77.8, 70.8, 62.1, 32.3, 29.3, 28.2, 22.3, 19.3. IR/ $\text{cm}^{-1}$ : 3335, 2934, 2859, 1470, 1383, 1366, 1115, 1055, 1007.

#### 5-(3,3-dimethyl-2-butoxy)-1-pentanol (B25)

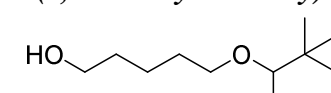 Compound **B15** (2.21 mmol) was subjected to general procedure B to provide **B27** (0.2089 g, 1.11 mmol) in a 50% yield as an oil after silica gel column purification.  $R_F = 0.32$  (20% EtOAc in PE).  $^1\text{H}$  NMR (400 MHz,  $\text{CDCl}_3$ )  $\delta$  3.64 (t,  $J = 6.6$  Hz, 2H), 3.57 (dt,  $J = 9.2, 6.1$  Hz, 1H), 3.26 (dt,  $J = 9.2, 6.6$  Hz, 1H), 2.95 (q,  $J = 6.3$  Hz, 1H), 1.64 - 1.51 (m, 4H), 1.50 - 1.36 (m, 2H), 1.03 (d,  $J = 6.3$  Hz, 3H), 0.87 (s, 9H).  $^{13}\text{C}$  NMR (100 MHz,  $\text{CDCl}_3$ )  $\delta$  83.4, 69.8, 62.8, 35.1, 32.5, 29.8, 26.0, 22.5, 14.0. IR/ $\text{cm}^{-1}$ : 3296, 2938, 2866, 1474, 1456, 1388, 1371, 1339, 1209, 1099, 1057.

#### 5-(3,3-dimethyl-1-butoxy)-1-pentanol (B26)

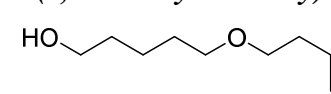 Compound **B16** (2.36 mmol) was subjected to general procedure B to provide **B26** (0.2142 g, 1.14 mmol) in a yield of 48% as oil after silica gel column purification.  $R_F = 0.22$  (20% EtOAc in PE).  $^1\text{H}$  NMR (400 MHz,  $\text{CDCl}_3$ )  $\delta$  3.63 (t,  $J = 6.5$  Hz, 2H), 3.51 - 3.36 (m, 4H), 1.60 (dq,  $J = 14.6, 6.6$  Hz, 4H), 1.54 - 1.49 (m, 2H), 1.48 - 1.37 (m, 2H), 0.92 (s, 9H).  $^{13}\text{C}$  NMR (100 MHz,  $\text{CDCl}_3$ )  $\delta$  70.9, 68.2, 62.6, 42.9, 32.4, 29.7, 29.6, 29.5, 22.5. IR/ $\text{cm}^{-1}$ : 3345, 2938, 2864, 1472, 1364, 1244, 1194, 1113, 1055.

#### 5-(cyclopropylmethoxy)-1-pentanol (B27)

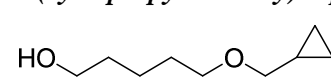 Compound **B17** (2.49 mmol) was subjected to general procedure B to provide **B27** (0.19 g, 1.19 mmol) in a yield of 48% as oil after silica gel column purification.  $R_F = 0.27$  (30% EtOAc in PE).  $^1\text{H}$  NMR (400 MHz,  $\text{CDCl}_3$ )  $\delta$  3.63 (t,  $J = 6.5$  Hz, 2H), 3.45 (t,  $J = 6.6$  Hz, 2H), 3.25 (d,  $J = 6.9$  Hz, 2H), 1.61 (m, 4H), 1.49 - 1.36 (m, 2H), 1.12 - 0.98 (m, 1H), 0.59 - 0.47 (m, 4H).  $^{13}\text{C}$  NMR (100 MHz,  $\text{CDCl}_3$ )  $\delta$  75.6, 70.6, 62.5, 32.4, 29.4, 22.4, 10.6, 3.0. IR/ $\text{cm}^{-1}$ : 3348, 2934, 2858, 1456, 1382, 1339, 1107, 1051.

#### 5-(cyclobutylmethoxy)-1-pentanol (B28)

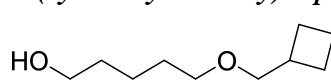 Compound **B18** (1.91 mmol) was subjected to general procedure B to provide **B28** (0.18 g, 1.02 mmol) in a yield of 53% as oil after silica gel

column purification.  $R_F = 0.41$  (30% EtOAc in PE).  $^1\text{H NMR}$  (400 MHz,  $\text{CDCl}_3$ )  $\delta$  3.61 (t,  $J = 6.6$  Hz, 2H), 3.42 (t,  $J = 6.5$  Hz, 2H), 3.27 (d,  $J = 7.2$  Hz, 2H), 2.12 - 2.18 (m, 1H), 1.81 - 1.68 (m, 1H), 1.64 - 1.50 (m, 7H), 1.47 - 1.37 (m, 2H), 1.26 - 1.15 (m, 2H).  $^{13}\text{C NMR}$  (100 MHz,  $\text{CDCl}_3$ )  $\delta$  75.6, 70.9, 62.4, 39.3, 32.4, 29.6, 29.3, 25.4, 22.4, 18.6.  $\text{IR}/\text{cm}^{-1}$ : 3360, 2933, 2858, 1456, 1364, 1113, 1057.

#### 5-(cyclopentylmethoxy)-1-pentanol (B29)

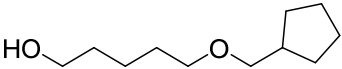 Compound **B19** (3.02 mmol) was subjected to general procedure B to provide **B29** (0.27 g, 1.43 mmol) in a yield of 47% as oil after silica gel column purification.  $R_F = 0.45$  (30% EtOAc in PE).  $^1\text{H NMR}$  (400 MHz,  $\text{CDCl}_3$ )  $\delta$  3.63 (t,  $J = 6.5$  Hz, 2H), 3.45 - 3.37 (m, 4H), 2.56 (p,  $J = 7.5$  Hz, 1H), 2.11 - 2.00 (m, 2H), 1.97 - 1.79 (m, 2H), 1.77 - 1.65 (m, 2H), 1.59 (dq,  $J = 14.6, 6.6$  Hz, 4H), 1.46 - 1.37 (m, 2H).  $^{13}\text{C NMR}$  (100 MHz,  $\text{CDCl}_3$ )  $\delta$  75.6, 70.9, 62.6, 35.1, 32.4, 29.7, 29.3, 25.2, 22.4.  $\text{IR}/\text{cm}^{-1}$ : 3333, 2939, 2862, 1456, 1373, 1361, 1115, 1057.

#### 5-(thiophen-3-methoxy)-1-pentanol (B30)

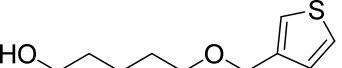 Compound **B20** (2.13 mmol) was subjected to general procedure B to provide **B30** (0.23 g, 1.15 mmol) in a yield of 69% as oil after silica gel column purification.  $R_F = 0.27$  (30% EtOAc in PE).  $^1\text{H NMR}$  (400 MHz,  $\text{CDCl}_3$ )  $\delta$  7.28 (dd,  $J = 4.9, 3.0$  Hz, 1H), 7.19 (ddt,  $J = 2.1, 1.5, 0.9$  Hz, 1H), 7.06 (dd,  $J = 4.9, 1.3$  Hz, 1H), 4.49 (s, 2H), 3.57 (t,  $J = 6.6$  Hz, 2H), 3.46 (t,  $J = 6.5$  Hz, 2H), 1.66 - 1.57 (m, 2H), 1.57 - 1.50 (m, 2H), 1.45 - 1.36 (m, 2H).  $^{13}\text{C NMR}$  (100 MHz,  $\text{CDCl}_3$ )  $\delta$  139.6, 127.3, 125.9, 122.7, 70.2, 68.1, 62.4, 32.4, 29.4, 22.4.

#### 5-(thiophen-3-ethoxy)-1-pentanol (B31)

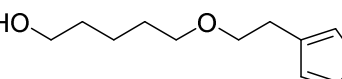 Compound **B21** (1.65 mmol) was subjected to General procedure B to provide **B31** (0.3318 g, 1.55 mmol) in a 73% yield as an oil after silica gel column purification.  $R_F = 0.30$  (30% EtOAc in PE).  $^1\text{H NMR}$  (400 MHz,  $\text{CDCl}_3$ )  $\delta$  7.23 (dd,  $J = 4.9, 3.0$  Hz, 1H), 7.00 - 7.03 (m, 1H), 6.97 (dd,  $J = 4.9, 1.3$  Hz, 1H), 3.62 (m, 4H), 3.45 (t,  $J = 6.5$  Hz, 2H), 2.90 (td,  $J = 7.0, 0.8$  Hz, 2H), 1.65 - 1.52 (m, 4H), 1.45 - 1.35 (m, 2H).  $^{13}\text{C NMR}$  (100 MHz,  $\text{CDCl}_3$ )  $\delta$  139.3, 128.5, 125.2, 121.1, 71.0, 70.9, 62.6, 32.4, 30.7, 29.4, 22.4.  $\text{IR}/\text{cm}^{-1}$ : 3360, 2934, 2860, 1456, 1418, 1348, 1250, 1225, 1155, 1094, 1053.

#### 5-(*R/S*-tetrahydrofuran-3-ylmethoxy)-1-pentanol (B12)

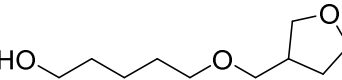 Compound **B11** (3.56 mmol) was subjected to general procedure B to provide **B12** (0.48 g, 2.56 mmol) in a yield of 72% as oil, after silica gel column purification.  $R_F = 0.33$  (2:1, EtOAc:PE).  $^1\text{H NMR}$  (400 MHz,  $\text{CDCl}_3$ )  $\delta$  3.82 (ddd,  $J = 8.4, 6.2, 2.4$  Hz, 2H), 3.72 (dt,  $J = 8.4, 7.3$  Hz, 1H), 3.63 - 3.52 (m, 3H), 3.47 - 3.36 (m, 3H), 3.31 (dd,  $J = 9.2, 7.9$  Hz, 1H), 2.58 - 2.42 (m, 1H), 2.04 - 1.93 (m, 1H), 1.59 (dddd,  $J = 16.3, 14.7, 8.0, 4.7$  Hz, 5H), 1.41 (tdd,  $J = 12.4, 6.5, 3.4$  Hz, 2H).  $^{13}\text{C NMR}$  (100 MHz,  $\text{CDCl}_3$ )  $\delta$  73.0, 71.0, 67.8, 62.4, 39.2, 32.5, 29.4, 29.1, 22.5.  $\text{IR}/\text{cm}^{-1}$ : 3385, 2934, 2858, 1456, 1375, 1211, 1113, 1072, 1056.

#### 5-(tetrahydro-2H-pyran-4-ylmethoxy)-1-pentanol (B32)

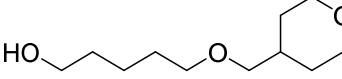 Compound **B23** (1.78 mmol) was subjected to general procedure B to provide **B32** (0.1409 g, 0.697 mmol) in a yield of 39% as oil after silica gel column purification.  $R_F = 0.31$  (2:1, EtOAc:PE).  $^1\text{H NMR}$  (400 MHz,  $\text{CDCl}_3$ )  $\delta$  3.96 (m, 2H), 3.60 (t,  $J = 6.6$  Hz, 2H), 3.45 - 3.34 (m, 4H), 3.25 (d,  $J = 6.6$  Hz, 2H), 1.83 (t,  $J = 3.4$  Hz, 1H), 1.70 - 1.51 (m, 6H), 1.46 - 1.36 (m, 2H), 1.36 - 1.21 (m, 2H).  $^{13}\text{C NMR}$  (100 MHz,  $\text{CDCl}_3$ )  $\delta$  75.9, 71.0, 67.6, 62.3, 35.3, 32.4, 29.9, 29.3, 22.4.  $\text{IR}/\text{cm}^{-1}$ : 3445, 2931, 2851, 1437, 1364, 1236, 1117, 1092, 1012, 987.

#### 5-(*R/S*-tetrahydrofuran-1-ylmethoxy)-1-pentanol (B33)

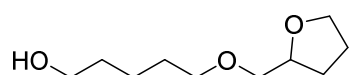

Compound **B25** (2.46 mmol) was subjected to general procedure B to provide **B33** (0.35 g, 1.86 mmol) in a yield of 76% as oil after silica gel column purification.  $R_F = 0.28$  (2:1, EtOAc:PE).  $^1\text{H NMR}$  (400 MHz,  $\text{CDCl}_3$ )  $\delta$  4.04 (ddd,  $J = 12.4, 6.9, 5.2$  Hz, 1H), 3.87 (dt,  $J = 8.3, 6.6$  Hz, 1H), 3.81 - 3.71 (m, 1H), 3.61 (t,  $J = 6.5$  Hz, 2H), 3.48 (td,  $J = 6.6, 2.2$  Hz, 2H), 3.44 - 3.39 (m, 2H), 2.02 - 1.79 (m, 3H), 1.66 - 1.54 (m, 5H), 1.48 - 1.36 (m, 2H).  $^{13}\text{C NMR}$  (100 MHz,  $\text{CDCl}_3$ )  $\delta$  77.8, 73.4, 71.4, 68.2, 62.3, 32.4, 29.3, 28.0, 25.5, 22.3. IR/ $\text{cm}^{-1}$ : 3410, 2934, 2858, 1645, 1454, 1375, 1109, 1072, 1055.

**General Procedure C: Bromination.** To a solution of alkyloxy-1-pentanol (1 mmol) in DCM (100 mL, 0.01 M) was added  $\text{PPh}_3$  (0.40 g, 1.5 mmol, 1.5 eq) and cooled to 0 °C. Then  $\text{CBr}_4$  (0.5 g, 1.5 mmol, 1.5 eq) was added and the reaction mixture was kept stirred at 0 °C until TLC monitored the completion of starting compound. After which Celite was added and the volatiles were evaporated. The residue was purified with silica gel column chromatography (0 - 100% toluene in heptane  $\rightarrow$  2 - 20% EtOAc in toluene) to give the bromide spacers.

#### *1-bromo-5-(2-methyl-1-propyloxy)pentane (B34)*

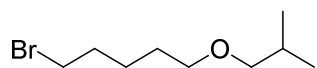

Alcohol **B24** (2.07 mmol) was subjected to general procedure C to provide **B34** (0.24 g, 1.08 mmol) in a yield of 52% after silica gel column purification.  $R_F = 0.71$  (100% tol)  $^1\text{H NMR}$  (400 MHz,  $\text{CDCl}_3$ )  $\delta$  3.41 (t,  $J = 6.9$  Hz, 2H), 3.40 (t,  $J = 6.3$  Hz, 2H), 3.16 (d,  $J = 6.7$  Hz, 2H), 1.90 - 1.85 (m, 3H), 1.65 - 1.56 (m, 2H), 1.56 - 1.47 (m, 2H), 0.90 (d,  $J = 6.7$  Hz, 6H).  $^{13}\text{C NMR}$  (100 MHz,  $\text{CDCl}_3$ )  $\delta$  77.9, 70.6, 33.7, 32.6, 28.9, 28.4, 25.0, 19.4. IR/ $\text{cm}^{-1}$ : 2940, 2863, 1473, 1363, 1332, 1100.

#### *1-bromo-5-(3,3-dimethyl-2-butoxy)pentane (B35)*

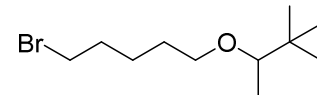

Alcohol **B25** (1.11 mmol) was subjected to general procedure C to provide **B35** (0.2477 g, 0.986 mmol) in a yield of 89% after silica gel column purification.  $R_F = 0.71$  (1:1, PE:tol).  $^1\text{H NMR}$  (400 MHz,  $\text{CDCl}_3$ )  $\delta$  3.56 (dt,  $J = 9.5, 5.8$  Hz, 1H), 3.41 (t,  $J = 6.9$  Hz, 2H), 3.24 (dt,  $J = 9.5, 6.1$  Hz, 1H), 2.94 (q,  $J = 6.3$  Hz, 1H), 1.88 (p,  $J = 7.0$  Hz, 2H), 1.64 - 1.44 (m, 4H), 1.03 (d,  $J = 6.3$  Hz, 3H), 0.87 (s, 9H).  $^{13}\text{C NMR}$  (100 MHz,  $\text{CDCl}_3$ )  $\delta$  83.3, 69.3, 35.1, 33.8, 32.7, 29.3, 26.0, 25.1, 13.9. IR/ $\text{cm}^{-1}$ : 2938, 2866, 1477, 1369, 1335, 1099.

#### *1-bromo-5-(3,3-dimethyl-1-butoxy)pentane (B36)*

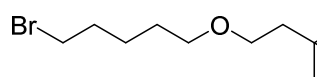

Alcohol **B26** (1.14 mmol) was subjected to general procedure C to provide **B36** (0.14 g, 0.54 mmol) in a yield of 48% after silica gel column purification.  $R_F = 0.71$  (100% tol).  $^1\text{H NMR}$  (400 MHz,  $\text{CDCl}_3$ )  $\delta$  3.52 - 3.36 (m, 6H), 2.00 - 1.79 (m, 2H), 1.65 - 1.55 (m, 2H), 1.55 - 1.47 (m, 4H), 0.92 (s, 9H).  $^{13}\text{C NMR}$  (100 MHz,  $\text{CDCl}_3$ )  $\delta$  70.6, 68.2, 43.0, 33.7, 32.7, 29.8, 29.6, 29.0, 25.0. IR/ $\text{cm}^{-1}$ : 2951, 2862, 1734, 1486, 1364, 1111.

#### *1-bromo-5-(cyclopropylmethoxy)pentane (B37)*

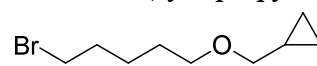

Alcohol **B27** (1.19 mmol) was subjected to general procedure C to provide **B37** (0.12 g, 0.54 mmol) in a yield of 46% after silica gel column purification.  $R_F = 0.52$  (100% tol).  $^1\text{H NMR}$  (400 MHz,  $\text{CDCl}_3$ )  $\delta$  3.44 (t,  $J = 6.4$  Hz, 2H), 3.42 (t,  $J = 6.8$  Hz, 2H), 3.25 (d,  $J = 6.9$  Hz, 2H), 1.89 (dt,  $J = 14.8, 7.0$  Hz, 2H), 1.67 - 1.56 (m, 2H), 1.58 - 1.47 (m, 2H), 1.13 - 0.98 (m, 1H), 0.58 - 0.49 (m, 2H), 0.20 (dt,  $J = 6.1, 4.5$  Hz, 2H).  $^{13}\text{C NMR}$  (100 MHz,  $\text{CDCl}_3$ )  $\delta$  75.6, 70.3, 33.8, 32.6, 28.9, 24.9, 10.6, 3.0. IR/ $\text{cm}^{-1}$ : 2934, 2857, 1732, 1456, 1381, 1337, 1250, 1107, 1016.

### ***1-bromo-5-(cyclobutylmethoxy)pentane (B38)***

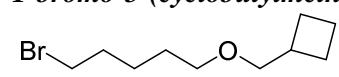 Alcohol **B28** (1.02 mmol) was subjected to general procedure C to provide **B38** (0.1276 g, 0.54 mmol) in a yield of 53% after silica gel column purification.  $R_F = 0.67$  (100% tol)  $^1\text{H NMR}$  (400 MHz,  $\text{CDCl}_3$ )  $\delta$  3.41, (t,  $J = 6.7$  Hz, 2H), 3.41 (t,  $J = 6.9$  Hz, 2H), 3.38 (d,  $J = 6.8$  Hz, 2H), 2.55 - 2.59 (m, 1H), 2.14 - 2.01 (m, 2H), 1.97 - 1.81 (m, 4H), 1.80 - 1.67 (m, 2H), 1.66 - 1.56 (m, 2H), 1.56 - 1.45 (m, 2H).  $^{13}\text{C NMR}$  (100 MHz,  $\text{CDCl}_3$ )  $\delta$  75.6, 70.7, 35.2, 33.8, 32.6, 28.9, 25.2, 24.9, 18.6. IR/ $\text{cm}^{-1}$ : 2932, 2855, 1732, 1456, 1364, 1246, 1111.

### ***1-bromo-5-(cyclopentylmethoxy)pentane (B39)***

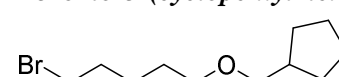 Alcohol **B29** (1.43 mmol) was subjected to general procedure C to provide **B39** (0.25 g, 1.01 mmol) in a yield of 71% after silica gel column purification.  $R_F = 0.71$  (100% tol)  $^1\text{H NMR}$  (400 MHz,  $\text{CDCl}_3$ )  $\delta$  3.43 (dd,  $J = 6.7, 6.0$  Hz, 2H), 3.43 (t,  $J = 6.8$  Hz, 1H), 3.27 (d,  $J = 7.1$  Hz, 2H), 2.13 (dq,  $J = 14.8, 7.4$  Hz, 1H), 1.89 (dt,  $J = 14.1, 7.0$  Hz, 2H), 1.79 - 1.66 (m, 2H), 1.64 - 1.45 (m, 8H), 1.29 - 1.16 (m, 2H).  $^{13}\text{C NMR}$  (100 MHz,  $\text{CDCl}_3$ )  $\delta$  75.6, 70.6, 39.5, 33.8, 32.6, 29.6, 28.9, 25.4, 25.0. IR/ $\text{cm}^{-1}$ : 2940, 2857, 1734, 1452, 1366, 1250, 1111.

### ***1-bromo-5-(thiophen-3-methoxy)pentane (B40)***

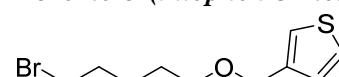 Alcohol **B30** (1.15 mmol) was subjected to general procedure C to provide **B40** (0.19 g, 0.74 mmol) in a yield of 45% after silica gel column purification.  $R_F = 0.67$  (100% tol).  $^1\text{H NMR}$  (400 MHz,  $\text{CDCl}_3$ )  $\delta$  7.30 (dd,  $J = 5.0, 3.0$  Hz, 1H), 7.23 (dd,  $J = 2.9, 1.2$  Hz, 1H), 7.10 (dd,  $J = 5.0, 1.2$  Hz, 1H), 4.56 - 4.51 (s, 2H), 3.50 (t,  $J = 6.3$  Hz, 2H), 3.44 (t,  $J = 6.8$  Hz, 2H), 1.90 (p,  $J = 7.0$  Hz, 2H), 1.72 - 1.59 (m, 2H), 1.62 - 1.48 (m, 2H).  $^{13}\text{C NMR}$  (100 MHz,  $\text{CDCl}_3$ )  $\delta$  139.7, 127.3, 126.0, 122.6, 70.0, 68.2, 33.8, 32.6, 28.9, 25.0. IR/ $\text{cm}^{-1}$ : 3000, 2934, 2857, 1732, 1153, 1096.

### ***1-bromo-5-(thiophen-3-ethoxy)pentane (B41)***

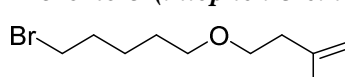 Alcohol **B31** (1.55 mmol) was subjected to general procedure C to provide **B41** (0.28 g, 0.99 mmol) in a yield of 46% after silica gel column purification.  $R_F = 0.67$  (100% tol).  $^1\text{H NMR}$  (400 MHz,  $\text{CDCl}_3$ )  $\delta$  7.25 - 7.21 (m, 1H), 7.00 (dq,  $J = 3.0, 1.0$  Hz, 1H), 6.97 (dd,  $J = 4.9, 1.3$  Hz, 1H), 3.62 (t,  $J = 7.0$  Hz, 2H), 3.44 (t,  $J = 6.3$  Hz, 2H), 3.39 (t,  $J = 6.8$  Hz, 2H), 2.90 (td,  $J = 7.0, 0.8$  Hz, 2H), 1.92 - 1.79 (m, 2H), 1.64 - 1.54 (m, 2H), 1.53 - 1.44 (m, 2H).  $^{13}\text{C NMR}$  (100 MHz,  $\text{CDCl}_3$ )  $\delta$  139.4, 128.5, 125.2, 121.1, 71.1, 70.6, 33.9, 32.6, 30.8, 28.9, 25.0. IR/ $\text{cm}^{-1}$ : 3102, 2934, 2857, 1734, 1109.

### ***1-bromo-5-(R/S-tetrahydrofuran-3-ylmethoxy)pentane (B13)***

 Alcohol **B12** (1.86 mmol) was subjected to general procedure C to provide **B13** (0.58 g, 2.32 mmol) in a yield of 91% after silica gel column purification.  $R_F = 0.33$  (5% EtOAc in PE).  $^1\text{H NMR}$  (400 MHz,  $\text{CDCl}_3$ )  $\delta$  3.87 - 3.78 (m, 2H), 3.78 - 3.66 (m, 1H), 3.56 (dd,  $J = 8.7, 5.4$  Hz, 1H), 3.46 - 3.25 (m, 6H), 2.51 (tt,  $J = 7.1, 1.4$  Hz, 1H), 2.06 - 1.94 (m, 1H), 1.92 - 1.83 (m, 2H), 1.65 - 1.54 (m, 3H), 1.54 - 1.45 (m, 2H).  $^{13}\text{C NMR}$  (100 MHz,  $\text{CDCl}_3$ )  $\delta$  73.2, 71.2, 71.0, 68.0, 39.4, 33.9, 32.8, 29.3, 29.0, 25.1. IR/ $\text{cm}^{-1}$ : 2934, 2857, 1486, 1111, 1076.

### ***1-bromo-5-(tetrahydro-2H-pyran-4-ylmethoxy)pentane (B42)***

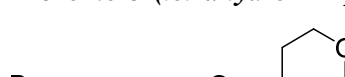 Alcohol **B32** (0.31 mmol) was subjected to general procedure C to provide **B42** (0.061 g, 0.23 mmol) in a 33% yield after silica gel column purification.  $R_F = 0.35$  (5% EtOAc in PE).  $^1\text{H NMR}$  (400 MHz,  $\text{CDCl}_3$ )  $\delta$  4.01 - 3.94 (m, 2H), 3.45 - 3.35 (m, 6H), 3.25 (d,  $J = 6.6$  Hz, 2H), 1.93 - 1.77 (m, 3H), 1.68 - 1.55 (m, 4H), 1.55 - 1.46 (m, 2H), 1.42 - 1.19 (m, 2H).  $^{13}\text{C NMR}$  (100 MHz,  $\text{CDCl}_3$ )  $\delta$  76.0, 70.8, 67.8, 35.5, 33.8, 32.6, 30.0, 28.9, 24.9. IR/ $\text{cm}^{-1}$ : 2924, 2845, 1734, 1384,

1115, 1092.

***1-bromo-5-(R/S-tetrahydrofuran-1-ylmethoxy) pentane (B43)***

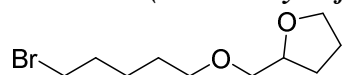

Alcohol **B33** (1.86 mmol) was subjected to general procedure C to provide **B43** (0.33 g, 1.30 mmol) in a yield of 70% after silica gel column purification.  $R_F = 0.33$  (5% EtOAc in PE).  $^1\text{H NMR}$  (400 MHz,  $\text{CDCl}_3$ )  $\delta$  4.04 (m, 1H), 3.88 (m, 1H), 3.75 (m, 1H), 3.49 (m, 2H), 3.47 - 3.39 (m, 4H), 1.99-1.83 (m, 5H), 1.66 - 1.62 (m, 3H), 1.61 - 1.53 (m, 2H).  $^{13}\text{C NMR}$  (400 MHz,  $\text{CDCl}_3$ )  $\delta$  77.9, 73.6, 71.2, 68.3, 33.8, 32.6, 28.8, 28.1, 25.6, 24.9. IR/ $\text{cm}^{-1}$ : 2938, 2860, 1456, 1437, 1117, 1070.



## Synthesis of the Alkylated Iminosugars

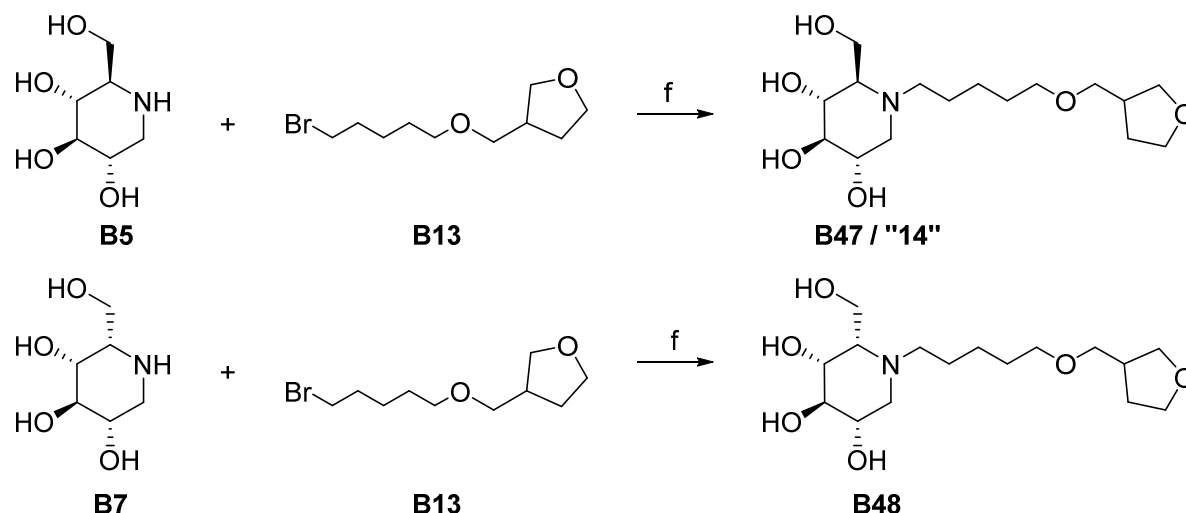

**Scheme S5:** *N*-Alkylation strategy of DNM and *L*-ido DNM: [a] TrtCl, TEA, EtOAc, 85°C, 3h, 99%; [b] *p*-TsCl, TEA, DMAP, DCM, 0°C to r.t., 2h, 70%; [c] 1) THF-3-yl-methanol, NaH, DMF, rt, 90 min; 2) **15**, 75°C, 1h, 56%; [d] BF<sub>3</sub>·OEt<sub>2</sub>, toluene/MeOH (1:1), 1.5h, 72%; [e] 1) PPh<sub>3</sub>, DCM, rt, 0 °C; 2) CBr<sub>4</sub>, Ar, 2h, 91%; [f] DMF, K<sub>2</sub>CO<sub>3</sub>, 80 °C, 88% (**B47**), 30% (**B48**).

**General Procedure D: Alkylation of iminosugars.** To a mixture of the 1-bromo-5-alkyloxy-pentane (0.3 mmol, 1.5 eq) and di-isopropylethylamine (DiPEA, 0.1 mL, 0.6 mmol, 3 eq) was added a solution of iminosugar (0.03 g, 0.2 mmol) in DMF (1 mL). This was stirred overnight at 70 °C. After cooling to r.t., the mixture was filtered and concentrated. The crude compound was purified using HPLC.

### *N*-[5-(2-methyl-1-propyloxy)pentyl]-1-deoxynojirimycin (**B44/11**)

Bromide chain **B34** (0.19 mmol) was subjected to general procedure D with 1-deoxynojirimycin (0.20 mmol) to provide **B44** (28 mg, 0.092 mmol, yield 46%). <sup>1</sup>H NMR (400 MHz, MeOD) δ 4.07 (d, *J* = 12.4 Hz, 1H), 3.93 (dd, *J* = 12.5, 2.9 Hz, 1H), 3.67 (td, *J* = 10.1, 4.5 Hz, 1H), 3.58 (t, *J* = 9.6 Hz, 1H), 3.47 (t, *J* = 6.3 Hz, 3H), 3.43 - 3.24 (m, 3H), 3.22 (d, *J* = 6.6 Hz, 2H), 3.10 (br s, 1H), 2.92 - 2.74 (m, 2H), 1.81 - 1.89 (m, 2H), 1.80 - 1.72 (m, 2H), 1.71 - 1.62 (m, 2H), 1.54 - 1.41 (m, 2H), 0.93 (d, *J* = 6.7 Hz, 6H), <sup>13</sup>C NMR (100 MHz, MeOD) δ 77.6, 77.2, 70.2, 68.1, 67.0, 66.1, 55.5, 54.0, 52.6, 28.9, 28.2, 23.3, 22.9, 18.3. [α]<sub>D</sub><sup>20</sup>: -7.17, (c = 0.56, MeOH). IR/cm<sup>-1</sup>: 3333, 2871, 1670, 1432, 1383, 1201, 1131, 1031. HRMS: found 306.2276 [M+H]<sup>+</sup>, calculated for [C<sub>15</sub>H<sub>31</sub>NO<sub>5</sub>+H]<sup>+</sup> 306.2275.

### *N*-[5-(3,3-dimethyl-2-butoxy)pentyl]-1-deoxynojirimycin (**B45/13**)

Bromide chain **B35** (0.32 mmol) was subjected to general procedure D with 1-deoxynojirimycin (0.20 mmol) to provide **B45** (31 mg, 0.094 mmol, yield 47%). <sup>1</sup>H NMR (400 MHz, MeOD) δ 4.14 (d, *J* = 12.4 Hz, 1H), 3.93 (dd, *J* = 12.6, 2.7 Hz, 1H), 3.72 (td, *J* = 10.4, 4.9 Hz, 1H), 3.68 - 3.58 (m, 3H), 3.48 (dd, *J* = 12.0, 4.9 Hz, 1H), 3.43 -

3.35 (m, 3H), 3.22 (td,  $J = 12.2, 5.1$  Hz, 1H), 3.07 (br d,  $J = 9.8$  Hz, 1H), 3.03 (d,  $J = 6.3$  Hz, 2H), 3.01 (dd,  $J = 12.5, 10.9$  Hz, 1H), 1.81 (dt,  $J = 11.1, 5.7$  Hz, 2H), 1.65 (dt,  $J = 8.8, 5.8$  Hz, 2H), 1.57 - 1.44 (m, 2H), 1.07 (d,  $J = 6.3$  Hz, 3H), 0.90 (s, 9H).  $^{13}\text{C}$  NMR (100 MHz, MeOD)  $\delta$  83.3, 76.7, 68.9, 67.4, 66.4, 66.0, 53.5, 53.5, 52.9, 34.6, 29.3, 25.0, 23.2, 22.6, 12.8.  $[\alpha]_{\text{D}}^{20}$ : -6.94 ( $c = 0.63$ , MeOH). IR/cm $^{-1}$ : 3330, 2956, 2875, 1672, 1439, 1203, 1134, 1029. HRMS: found 334.2588  $[\text{M}+\text{H}]^+$ , calculated for  $[\text{C}_{17}\text{H}_{35}\text{NO}_5+\text{H}]^+$  334.2588.

#### *N*-[5-(3,3-dimethyl-1-butoxy)pentyl]-1-deoxynojirimycin (**B46**)

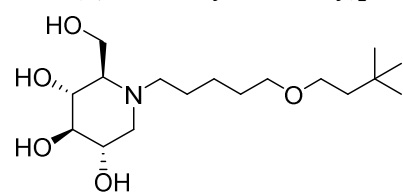

Bromide chain **B36** (0.299 mmol) was subjected to general procedure D with 1-deoxynojirimycin (0.20 mmol) to provide **B46** (28 mg, 0.085 mmol, yield 43%).  $^1\text{H}$  NMR (400 MHz, MeOD)  $\delta$  4.12 (d,  $J = 12.5$  Hz, 1H), 3.93 (dd,  $J = 12.3, 2.8$  Hz, 1H), 3.71 (td,  $J = 10.4, 10.0, 4.4$  Hz, 1H), 3.62 (t,  $J = 9.7$  Hz, 1H), 3.50 (t,  $J = 7.3$  Hz, 2H), 3.50 (dd,  $J = 9.0, 1.5$  Hz, 1H), 3.46 (t,  $J = 6.3$  Hz, 3H), 3.43 - 3.36 (m, 2H), 3.22 (td,  $J = 12.1, 5.2$  Hz, 1H), 3.07 (br d,  $J = 10.3$  Hz, 1H), 3.00 (t,  $J = 11.7$  Hz, 1H), 1.90 - 1.71 (m, 2H), 1.65 (ddd,  $J = 13.7, 7.5, 6.0$  Hz, 2H), 1.51 (t,  $J = 7.4$  Hz, 2H), 1.53 - 1.43 (m, 2H), 0.94 (s, 9H).  $^{13}\text{C}$  NMR (100 MHz, MeOD)  $\delta$  76.7, 70.0, 67.9, 67.4, 66.4, 66.0, 53.4, 53.3, 52.9, 42.6, 29.7, 28.7, 25.8, 25.0, 22.6.  $[\alpha]_{\text{D}}^{20}$ : +0.56 ( $c = 0.57$ , MeOH). IR/cm $^{-1}$ : 3343, 2954, 2870, 1673, 1433, 1203, 1134. HRMS: found 334.2589  $[\text{M}+\text{H}]^+$ , calculated for  $[\text{C}_{17}\text{H}_{35}\text{NO}_5+\text{H}]^+$  334.2588.

#### *N*-[5-(*R/S*-tetrahydrofuran-3-ylmethoxy)pentyl]-1-deoxynojirimycin (**B47/14**)

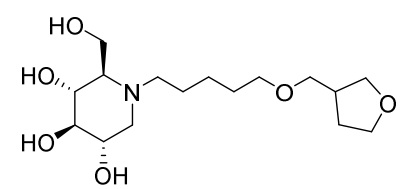

Bromide chain **B13** (0.29 mmol) was subjected to general procedure D with 1-deoxynojirimycin (0.20 mmol) to provide **B47** (58.5 mg, 0.17 mmol, yield 88%).  $^1\text{H}$  NMR (400 MHz, MeOD)  $\delta$  4.14 (d,  $J = 12.6$  Hz, 1H), 3.93 (dd,  $J = 12.4, 3.0$  Hz, 1H), 3.85 (dd,  $J = 8.3, 5.5$  Hz, 1H), 3.83 (dd,  $J = 8.7, 7.2$  Hz, 1H), 3.78 - 3.69 (m, 2H), 3.63 (t,  $J = 9.8$  Hz, 1H), 3.58 (dd,  $J = 8.6, 5.5$  Hz, 2H), 3.52 - 3.47 (m, 1H), 3.50 (td,  $J = 6.3, 1.7$  Hz, 2H), 3.44 (dd,  $J = 9.2, 6.3$  Hz, 1H), 3.43 - 3.35 (m, 3H), 3.22 (td,  $J = 12.2, 5.2$  Hz, 1H), 3.07 (br d,  $J = 9.9$  Hz, 1H), 3.01 (t,  $J = 11.7$  Hz, 1H), 2.59 - 2.48 (m, 1H), 2.04 (dddd,  $J = 12.8, 8.5, 7.7, 5.5$  Hz, 1H), 1.91 - 1.72 (m, 2H), 1.72 - 1.60 (m, 3H), 1.53 - 1.47 (m, 1H).  $^{13}\text{C}$  NMR (100 MHz, MeOD)  $\delta$  76.7, 72.5, 70.5, 70.3, 67.4, 67.3, 66.4, 66.0, 53.5, 53.5, 52.9, 39.0, 28.7, 28.5, 23.1, 22.5. IR/cm $^{-1}$ : 3346, 2970, 2942, 1738, 1670, 1430, 1366, 1199, 1132, 898.  $[\alpha]_{\text{D}}^{20}$ : -1.89 ( $c = 1.17$ , MeOH). HRMS: found 334.2228  $[\text{M}+\text{H}]^+$ , calculated for  $[\text{C}_{16}\text{H}_{31}\text{NO}_6+\text{H}]^+$  334.2224.

#### *N*-[5-(cyclopropylmethoxy)pentyl]-1-deoxynojirimycin (**B49**)

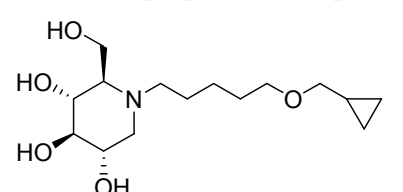

Bromide chain **B37** (0.30 mmol) was subjected to General Procedure D with 1-deoxynojirimycin (0.20 mmol) to provide **B49** (30 mg, 0.097 mmol, yield 49%).  $^1\text{H}$  NMR (400 MHz, MeOD)  $\delta$  4.13 (d,  $J = 12.6$  Hz, 1H), 3.94 (dd,  $J = 12.7, 3.1$  Hz, 1H), 3.73 (td,  $J = 10.3, 4.7$  Hz, 1H), 3.64 (t,  $J = 9.8$  Hz, 1H), 3.52 (t,  $J = 6.3$  Hz, 2H), 3.51 - 3.46 (m, 1H), 3.40 (t,  $J = 9.2$  Hz, 1H), 3.40 - 3.36 (m, 1H), 3.30 (d,  $J = 6.9$  Hz, 2H), 3.23 (td,  $J = 12.3, 5.3$  Hz, 1H), 3.08 (br d,  $J = 10.1$  Hz, 1H), 3.01 (t,  $J = 11.7$  Hz, 1H), 1.91 - 1.73 (m, 2H), 1.72 - 1.63 (m, 2H), 1.55 - 1.45 (m, 2H), 1.06 (dddd,  $J = 13.3, 6.9, 5.0, 2.6$  Hz, 1H), 0.57 - 0.51 (m, 2H), 0.22 (dt,  $J = 6.1, 4.4$  Hz, 2H).  $^{13}\text{C}$  NMR (100 MHz, MeOD)  $\delta$  76.7, 75.3, 69.8, 67.4, 66.4, 66.0, 53.6, 53.4, 52.9, 28.7, 23.1, 22.5, 10.0, 2.1.  $[\alpha]_{\text{D}}^{20}$ : -6.08 ( $c = 0.59$ , MeOH). IR/cm $^{-1}$ : 3346, 2866, 1672, 1430, 1202, 1134, 1032. HRMS: found 304.2119  $[\text{M}+\text{H}]^+$ , calculated for  $[\text{C}_{15}\text{H}_{29}\text{NO}_5+\text{H}]^+$  304.2118.

#### *N*-[5-(cyclobutylmethoxy)pentyl]-1-deoxynojirimycin (**B50**)

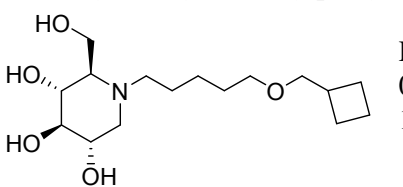

Bromide chain **B38** (0.31 mmol) was subjected to general procedure D with 1-deoxynojirimycin (0.20 mmol) to provide **B50** (25 mg, 0.079 mmol, yield 39%).  $^1\text{H}$  NMR (400 MHz, MeOD)  $\delta$  4.14 (d,  $J = 12.5$  Hz, 1H), 3.93 (dd,  $J = 12.7, 3.1$  Hz, 1H), 3.71 (td,  $J = 10.7, 10.2,$

4.7 Hz, 1H), 3.63 (t,  $J = 9.8$  Hz, 1H), 3.49 (t,  $J = 6.2$  Hz, 2H), 3.48 (dd,  $J = 11.8, 5.2$  Hz, 1H), 3.43 (d,  $J = 6.8$  Hz, 2H), 3.43 - 3.36 (m, 1H), 3.39 (t,  $J = 9.4$  Hz, 1H), 3.22 (td,  $J = 12.3, 5.3$  Hz, 1H), 3.06 (br d,  $J = 11.2$  Hz, 1H), 3.01 (t,  $J = 11.7$  Hz, 1H), 2.58 (dq,  $J = 14.6, 7.3$  Hz, 1H), 2.14 - 2.03 (m, 2H), 2.03 - 1.91 (m, 2H), 1.91 - 1.72 (m, 4H), 1.67 (ddd,  $J = 13.7, 7.5, 5.9$  Hz, 2H), 1.49 (td,  $J = 10.6, 7.2$  Hz, 2H).  $^{13}\text{C}$  NMR (100 MHz, MeOD)  $\delta$  76.7, 75.2, 70.2, 67.4, 66.4, 66.0, 53.5, 53.4, 52.9, 35.1, 28.7, 24.6, 23.1, 22.5, 18.0.  $[\alpha]_{\text{D}}^{20}$ : -6.02 ( $c = 0.50$ , MeOH). IR/cm $^{-1}$ : 3341, 2938, 2865, 1673, 1431, 1202, 1135, 1031. HRMS: found 318.2276  $[\text{M}+\text{H}]^+$ , calculated for  $[\text{C}_{16}\text{H}_{31}\text{NO}_5+\text{H}]^+$  318.2275.

#### *N*-[5-(cyclopentylmethoxy)pentyl]-1-deoxynojirimycin (**B51**)

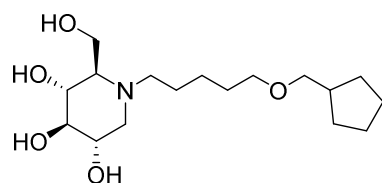

Bromide chain **B39** (0.30 mmol) was subjected to general procedure D with 1-deoxynojirimycin (0.20 mmol) to provide **B51** (23 mg, 0.069 mmol, yield 35%).  $^1\text{H}$  NMR (400 MHz, MeOD)  $\delta$  4.13 (d,  $J = 12.5$  Hz, 1H), 3.93 (dd,  $J = 12.6, 3.1$  Hz, 1H), 3.72 (dt,  $J = 14.7, 4.6$  Hz, 1H), 3.63 (t,  $J = 9.7$  Hz, 1H), 3.52 - 3.44 (m, 1H), 3.49 (t,  $J = 6.2$  Hz, 2H), 3.43 - 3.35 (m, 2H), 3.33 (d,  $J = 7.1$  Hz, 2H), 3.22 (td,  $J = 12.3, 5.3$  Hz, 1H), 3.07 (d,  $J = 9.5$  Hz, 1H), 3.00 (t,  $J = 11.7$  Hz, 1H), 2.21 - 2.12 (m, 1H), 1.88 - 1.71 (m, 4H), 1.71 - 1.54 (m, 6H), 1.50 (qd,  $J = 7.9, 5.1$  Hz, 2H), 1.35 - 1.22 (m, 2H).  $^{13}\text{C}$  NMR (100 MHz, MeOD)  $\delta$  76.7, 75.3, 70.1, 67.4, 66.4, 66.0, 53.5, 53.5, 52.8, 39.3, 29.2, 28.7, 25.0, 23.1, 22.7.  $[\alpha]_{\text{D}}^{20}$ : -4.76 ( $c = 0.46$ , MeOH). IR/cm $^{-1}$ : 3346, 2950, 2867, 1673, 1433, 1203, 1133, 1032. HRMS: found 332.2432  $[\text{M}+\text{H}]^+$ , calculated for  $[\text{C}_{17}\text{H}_{33}\text{NO}_5+\text{H}]^+$  332.2432.

#### *N*-[5-(thiophen-3-methoxy)pentyl]-1-deoxynojirimycin (**B52**)

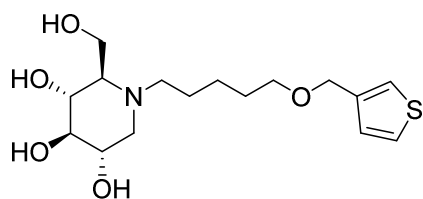

Bromide chain **B40** (0.29 mmol) was subjected to general procedure D with 1-deoxynojirimycin (0.20 mmol) to provide **B52** (41 mg, 0.12 mmol, yield 59%).  $^1\text{H}$  NMR (400 MHz, MeOD)  $\delta$  7.41 (dd,  $J = 5.0, 3.0$  Hz, 1H), 7.34 - 7.31 (m, 1H), 7.10 (dd,  $J = 5.0, 1.2$  Hz, 1H), 4.54 (s, 2H), 4.12 (d,  $J = 12.2$  Hz, 1H), 3.92 (dd,  $J = 12.7, 3.1$  Hz, 1H), 3.71 (td,  $J = 10.1, 4.5$  Hz, 1H), 3.62 (t,  $J = 9.8$  Hz, 1H), 3.54 (t,  $J = 6.2$  Hz, 2H), 3.46 (dd,  $J = 12.1, 4.8$  Hz, 1H), 3.43 - 3.36 (m, 2H), 3.21 (td,  $J = 12.3, 5.2$  Hz, 1H), 3.11 - 3.02 (m, 1H), 2.99 (t,  $J = 11.7$  Hz, 1H), 1.89 - 1.74 (m, 2H), 1.69 (ddd,  $J = 13.6, 7.5, 6.0$  Hz, 2H), 1.53 - 1.45 (m, 2H).  $^{13}\text{C}$  NMR (100 MHz, MeOD)  $\delta$  139.5, 127.1, 125.6, 122.6, 76.7, 69.3, 67.6, 67.4, 66.4, 66.0, 53.5, 53.5, 52.9, 28.6, 23.1, 22.5.  $[\alpha]_{\text{D}}^{20}$ : -3.16 ( $c = 0.82$ , MeOH). IR/cm $^{-1}$ : 3346, 2963, 2867, 1672, 1429, 1366, 1202, 1133, 1032. HRMS: found 346.1684  $[\text{M}+\text{H}]^+$ , calculated for  $[\text{C}_{16}\text{H}_{27}\text{NO}_5\text{S}+\text{H}]^+$  346.1684.

#### *N*-[5-(thiophen-3-ethoxy)pentyl]-1-deoxynojirimycin (**B53**)

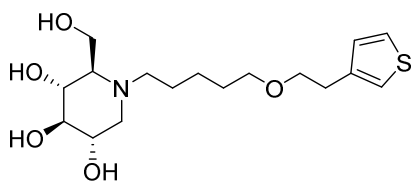

Bromide chain **B41** (0.29 mmol) was subjected to general procedure D with 1-deoxynojirimycin (0.20 mmol) to provide **B53** (10 mg, 0.028 mmol, yield 14%).  $^1\text{H}$  NMR (400 MHz, MeOD)  $\delta$  7.33 (dd,  $J = 5.0, 2.9$  Hz, 1H), 7.11 (dd,  $J = 3.0, 1.1$  Hz, 1H), 7.02 (dd,  $J = 4.9, 1.3$  Hz, 1H), 4.12 (d,  $J = 12.5$  Hz, 1H), 3.92 (d,  $J = 12.3$  Hz, 1H), 3.74 - 3.70 (m, 1H), 3.68 (t,  $J = 6.7$  Hz, 2H), 3.62 (t,  $J = 9.7$  Hz, 1H), 3.52 (t,  $J = 6.2$  Hz, 2H), 3.45 (dd,  $J = 12.1, 4.8$  Hz, 1H), 3.42 - 3.34 (m, 2H), 3.23 - 3.13 (m, 1H), 3.06 - 3.00 (m, 1H), 2.97 (t,  $J = 11.7$  Hz, 1H), 2.91 (dd,  $J = 7.1, 6.3$  Hz, 2H), 1.86 - 1.70 (m, 2H), 1.70 - 1.62 (m, 2H), 1.52 - 1.40 (m, 2H).  $^{13}\text{C}$  NMR (100 MHz, MeOD)  $\delta$  139.3, 128.1, 124.7, 120.7, 76.8, 70.8, 69.9, 67.5, 66.4, 66.0, 53.4, 53.0, 30.2, 28.7, 24.0, 23.1.  $[\alpha]_{\text{D}}^{20}$ : -9.09 ( $c = 0.20$ , MeOH). IR/cm $^{-1}$ : 3358, 3018, 2943, 2870, 1736, 1677, 1439, 1366, 1205, 1134, 1031. HRMS: found 360.1849  $[\text{M}+\text{H}]^+$ , calculated for  $[\text{C}_{17}\text{H}_{29}\text{NO}_5\text{S}+\text{H}]^+$  360.1839.

#### *N*-[5-(tetrahydro-2H-pyran-4-ylmethoxy)pentyl]-1-deoxynojirimycin (**B54**)

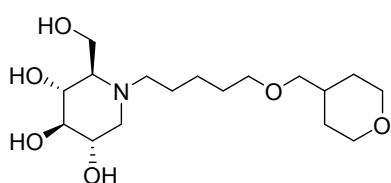

Bromide chain **B42** (0.29 mmol) was subjected to general procedure D with 1-deoxynojirimycin (0.20 mmol) to provide **B54** (35 mg, 0.10 mmol, yield 50%).  $^1\text{H}$  NMR (400 MHz, MeOD)  $\delta$  4.14 (d,  $J = 12.5$  Hz, 1H), 3.92 (dd,  $J = 11.8, 2.6$  Hz, 1H), 3.99 -

3.94 (m, 2H), 3.70 (ddd,  $J = 11.2, 9.3, 4.9$  Hz, 1H), 3.62 (dd,  $J = 10.4, 9.2$  Hz, 1H), 3.49 (t,  $J = 6.2$  Hz, 2H), 3.48 - 3.35 (m, 5H), 3.31 (d,  $J = 6.4$  Hz, 2H), 3.23 (dd,  $J = 12.1, 5.3$  Hz, 1H), 3.06 (dd,  $J = 10.3, 2.7$  Hz, 1H), 3.01 (t,  $J = 11.7$  Hz, 1H), 1.92 - 1.84 (m, 1H), 1.84 - 1.72 (m, 2H), 1.72 - 1.62 (m, 4H), 1.57 - 1.45 (m, 2H), 1.30 - 1.38 (m, 2H).  $^{13}\text{C}$  NMR (100 MHz, MeOD)  $\delta$  76.8, 75.5, 70.2, 67.3, 67.3, 66.4, 66.0, 53.5, 53.4, 52.8, 35.2, 29.6, 28.7, 23.1, 22.5.  $[\alpha]_{\text{D}}^{20}$ : -4.01 ( $c = 0.70$ , MeOH). IR/cm $^{-1}$ : 3333, 2923, 2859, 1671, 1433, 1387, 1200, 1136, 1088, 1032. HRMS: found 348.2381  $[\text{M}+\text{H}]^+$ , calculated for  $[\text{C}_{17}\text{H}_{33}\text{NO}_6+\text{H}]^+$  348.2381.

***N*-[5-(*R/S*-tetrahydrofuran-1-ylmethoxy)pentyl]-1-deoxynojirimycin (B55/15)**

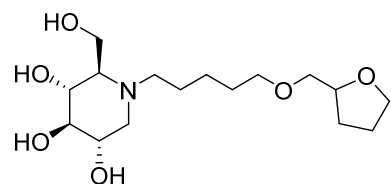

Bromide chain **B43** (0.29 mmol) was subjected to general procedure D with 1-deoxynojirimycin (0.20 mmol) to provide **B55** (10 mg, 0.030 mmol, yield 15%).  $^1\text{H}$  NMR (600 MHz, MeOD)  $\delta$  4.12 (d,  $J = 11.5$  Hz, 1H), 4.07 - 4.01 (m, 1H), 3.91 (dd,  $J = 12.5, 3.2$  Hz, 1H), 3.85 (dt,  $J = 8.2, 6.7$  Hz, 1H), 3.76 (td,  $J = 7.7, 6.1$  Hz, 1H), 3.64 - 3.72 (m, 1H), 3.60 (dd,  $J = 12.7, 6.6$  Hz, 1H), 3.51 (td,  $J = 6.2, 3.8$  Hz, 1H), 3.47 - 3.34 (m, 5H), 3.20 (td,  $J = 12.4, 5.0$  Hz, 1H), 3.04 (d,  $J = 9.9$  Hz, 1H), 2.99 (t,  $J = 11.7$  Hz, 1H), 2.01 - 1.95 (m, 1H), 1.94 - 1.87 (m, 1H), 1.87 - 1.71 (m, 2H), 1.66 (tt,  $J = 7.5, 5.9$  Hz, 2H), 1.63 - 1.57 (m, 1H), 1.54 - 1.43 (m, 2H).  $^{13}\text{C}$  NMR (150 MHz, MeOD)  $\delta$  80.3, 79.0, 75.4, 72.8, 70.1, 69.6, 68.7, 68.3, 63.2, 55.8, 55.2, 33.7, 30.8, 29.8, 27.4, 25.4. IR/cm $^{-1}$ : 3367, 2964, 2902, 1674, 1396, 1066.  $[\alpha]_{\text{D}}^{20}$ : -9.8 ( $c = 0.20$ , MeOH). HRMS: found 334.2227  $[\text{M}+\text{H}]^+$ , calculated for  $[\text{C}_{16}\text{H}_{31}\text{NO}_6+\text{H}]^+$  334.2224.

***N*-[5-(*R/S*-tetrahydrofuran-3-ylmethoxy)pentyl]-L-ido-1-deoxynojirimycin (B48)**

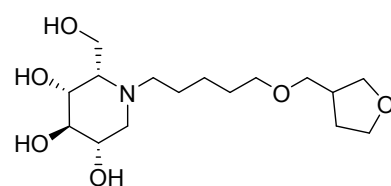

Bromide chain **B13** (0.29 mmol) was subjected to general procedure D with L-ido-1-deoxynojirimycin (0.20 mmol) to provide **B48** (20 mg, 0.060 mmol, yield 30%).  $^1\text{H}$  NMR (400 MHz, MeOD)  $\delta$  4.05 - 3.95 (m, 3H), 3.90 (t,  $J = 3.0$  Hz, 1H), 3.88 - 3.80 (m, 2H), 3.77 - 3.70 (m, 1H), 3.58 (dd,  $J = 8.6, 5.5$  Hz, 1H), 3.56 - 3.52 (m, 2H), 3.50 (td,  $J = 6.3, 1.8$  Hz, 2H), 3.44 (dd,  $J = 9.3, 6.2$  Hz, 1H), 3.41 - 3.32 (m, 4H), 2.50 - 2.58 (m, 1H), 2.00 - 2.08 (m, 2H), 1.97 - 1.72 (m, 2H), 1.71 - 1.60 (m, 2H), 1.48 (p,  $J = 7.6$  Hz, 2H).  $^{13}\text{C}$  NMR (100 MHz, MeOD)  $\delta$  72.5, 70.9, 70.5, 70.3, 67.5, 67.3, 66.7, 62.4, 60.0, 53.7, 53.0, 39.0, 28.7, 28.5, 23.1, 21.9. IR/cm $^{-1}$ : 3355, 2971, 1674, 1201, 1132, 1066.  $[\alpha]_{\text{D}}^{20}$ : +10.50 ( $c = 0.40$ , MeOH). HRMS: found 334.2230  $[\text{M}+\text{H}]^+$ , calculated for  $[\text{C}_{16}\text{H}_{31}\text{NO}_6+\text{H}]^+$  334.2224.

***N*-[5-(2-methyl-1-propyloxy)pentyl]-L-ido-1-deoxynojirimycin (B56/12)**

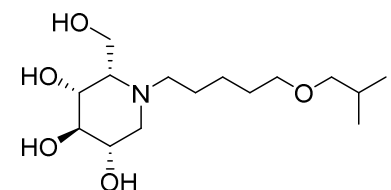

Bromide chain **B34** (0.19 mmol) was subjected to general procedure D with L-ido-1-deoxynojirimycin (0.20 mmol) to provide **B56** (28 mg, 0.092 mmol, yield 46%).  $^1\text{H}$  NMR (400 MHz, MeOD)  $\delta$  3.85 (t,  $J = 5.7$  Hz, 2H), 3.72 (dd,  $J = 8.9, 5.2$  Hz, 1H), 3.61 - 3.51 (m, 1H), 3.46 (t,  $J = 6.5$  Hz, 2H), 3.43 - 3.37 (m, 1H), 3.21 (d,  $J = 6.7$  Hz, 2H), 3.05 (q,  $J = 5.3$  Hz, 1H), 2.85 - 2.73 (m, 2H), 2.71 - 2.64 (m, 1H), 2.59 (dd,  $J = 12.4, 9.7$  Hz, 1H), 1.68 - 1.50 (m, 6H), 1.41 (p,  $J = 7.4$  Hz, 3H), 0.94 (s, 3H), 0.92 (s, 3H).  $^{13}\text{C}$  NMR (100 MHz, MeOD)  $\delta$  79.8, 76.8, 73.6, 72.8, 72.1, 65.2, 58.5, 56.4, 53.7, 31.5, 30.4, 29.3, 25.8, 20.6.  $[\alpha]_{\text{D}}^{20}$ : +1.73 ( $c = 0.69$ , MeOH). IR/cm $^{-1}$ : 3345, 2870, 1673, 1430, 1381, 1198, 1132, 1028. HRMS: found 320.2432  $[\text{M}+\text{H}]^+$ , calculated for  $[\text{C}_{16}\text{H}_{33}\text{NO}_5+\text{H}]^+$  320.2431.

***N*-[5-(*R/S*-tetrahydrofuran-1-ylmethoxy)pentyl]-L-ido-1-deoxynojirimycin (B57)**

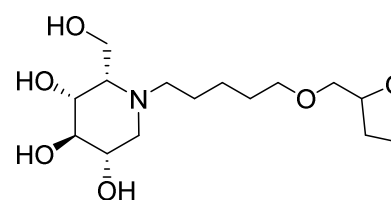

Bromide chain **B43** (0.29 mmol) was subjected to General Procedure D with L-ido-1-deoxynojirimycin (0.20 mmol) to provide **B57** (23 mg, 0.069 mmol, yield 34%).  $^1\text{H}$  NMR (400 MHz, MeOD)  $\delta$  4.12 - 3.94 (m, 5H), 3.93 - 3.83 (m, 2H), 3.82 - 3.74 (m, 1H), 3.58 - 3.48 (m, 5H), 3.48 - 3.29 (m, 3H), 2.08 - 1.85 (m, 4H), 1.85 - 1.73 (m, 1H), 1.70 - 1.59 (m, 3H), 1.50 (q,  $J$

= 7.5 Hz, 2H).  $^{13}\text{C}$  NMR (100 MHz, MeOD)  $\delta$  78.0, 73.1, 70.9, 70.6, 67.8, 67.6, 66.7, 62.4, 59.9, 53.7, 53.0, 28.6, 27.5, 25.2, 23.1, 21.8. IR/cm $^{-1}$ : 3346, 2871, 1673, 1432, 1200, 1132, 1071.  $[\alpha]_{\text{D}}^{20}$ : +12.5 (c = 0.46, MeOH). HRMS: found 334.2228  $[\text{M}+\text{H}]^+$ , calculated for  $[\text{C}_{16}\text{H}_{31}\text{NO}_6+\text{H}]^+$  334.2224.

***N*-[5-(cyclopentylmethoxy)pentyl]-L-ido-1-deoxynojirimycin (B58)**

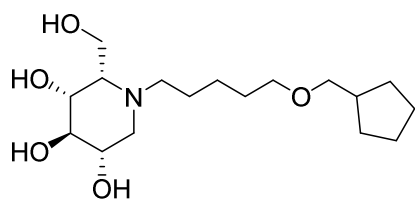

Bromide chain **B39** (0.30 mmol) was subjected to General Procedure D with L-ido-1-deoxynojirimycin (0.20 mmol) to provide **B58** (23 mg, 0.069 mmol, yield 35%).  $^1\text{H}$  NMR (400 MHz, MeOD)  $\delta$  4.05 (br s, 1H), 4.03 - 3.94 (m, 3H), 3.90 (br s, 1H), 3.60 - 3.51 (m, 2H), 3.49 (t,  $J$  = 6.3 Hz, 2H), 3.40 - 3.33 (m, 5H), 2.17 (dt,  $J$  = 14.9, 7.6 Hz, 1H), 1.96 - 1.72 (m, 4H), 1.71 - 1.54 (m, 6H), 1.48 (p,  $J$  = 7.7 Hz, 2H), 1.24 - 1.32 (m, 2H).  $^{13}\text{C}$

NMR (100 MHz, MeOD)  $\delta$  75.3, 70.9, 70.2, 67.5, 66.6, 62.4, 60.0, 53.6, 53.0, 39.3, 29.2, 28.7, 25.0, 23.1, 21.9. IR/cm $^{-1}$ : 3374, 2953, 2873, 1678, 1440, 1205, 1136, 1072.  $[\alpha]_{\text{D}}^{20}$ : +4.33 (c = 0.46, MeOH). HRMS: found 332.2436  $[\text{M}+\text{H}]^+$ , calculated for  $[\text{C}_{17}\text{H}_{33}\text{NO}_5+\text{H}]^+$  332.2432.

***N*-[5-(3,3-dimethyl-2-butoxy)pentyl]-L-ido-1-deoxynojirimycin (B59)**

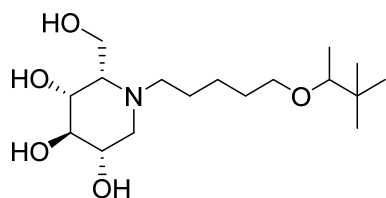

Bromide chain **B35** (0.32 mmol) was subjected to general procedure D with L-ido-1-deoxynojirimycin (0.20 mmol) to provide **B59** (14 mg, 0.042 mmol, yield 21%).  $^1\text{H}$  NMR (400 MHz, MeOD)  $\delta$  4.05 (br s, 1H), 4.03 - 3.95 (m, 3H), 3.93 - 3.86 (m, 1H), 3.64 (ddd,  $J$  = 8.9, 7.6, 4.7 Hz, 1H), 3.58 - 3.47 (m, 2H), 3.41 - 3.30 (m, 4H), 3.04 (q,  $J$  = 6.3 Hz, 1H), 1.95 - 1.72 (m, 2H), 1.66 (dt,  $J$  = 12.9, 6.2 Hz, 2H), 1.56 - 1.44 (m, 2H), 1.08 (d,  $J$  = 6.4 Hz, 3H),

0.91 (s, 9H).  $^{13}\text{C}$  NMR (100 MHz, MeOD)  $\delta$  83.3, 70.9, 68.9, 67.5, 66.6, 62.4, 60.0, 53.7, 53.0, 34.6, 29.4, 25.0, 23.3, 22.0, 12.8. IR/cm $^{-1}$ : 3372, 2972, 1673, 1393, 1203, 1139, 1066.  $[\alpha]_{\text{D}}^{20}$ : +1.44 (c = 0.28, MeOH). HRMS: found 334.2594  $[\text{M}+\text{H}]^+$ , calculated for  $[\text{C}_{17}\text{H}_{35}\text{NO}_5+\text{H}]^+$  334.2588.

***N*-[5-(thiophen-3-methoxy)pentyl]-L-ido-1-deoxynojirimycin (B60)**

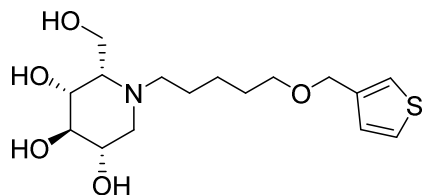

Bromide chain **B40** (0.29 mmol) was subjected to general procedure D with L-ido-1-deoxynojirimycin (0.20 mmol) to provide **B60** (14 mg, 0.042 mmol, yield 21%).  $^1\text{H}$  NMR (400 MHz, MeOD)  $\delta$  7.41 (dd,  $J$  = 5.0, 2.9 Hz, 1H), 7.33 (dd,  $J$  = 2.8, 1.2 Hz, 1H), 7.11 (dd,  $J$  = 5.0, 1.2 Hz, 1H), 4.54 (d,  $J$  = 0.7 Hz, 2H), 4.04 (br s, 1H), 4.01 - 3.93 (m, 3H), 3.89 (t,  $J$  = 3.7 Hz,

1H), 3.54 (t,  $J$  = 6.2 Hz, 2H), 3.55 - 3.44 (m, 2H), 3.39 - 3.28 (m, 3H), 1.98 - 1.72 (m, 2H), 1.69 (dt,  $J$  = 8.3, 6.3 Hz, 2H), 1.50 (q,  $J$  = 7.6 Hz, 2H).  $^{13}\text{C}$  NMR (100 MHz, MeOD)  $\delta$  139.5, 127.1, 125.6, 122.6, 70.9, 69.3, 67.6, 67.5, 66.6, 62.4, 60.0, 53.6, 53.0, 28.7, 23.1, 21.8. IR/cm $^{-1}$ : 3346, 2970, 1673, 1409, 1201, 1133, 1066.  $[\alpha]_{\text{D}}^{20}$ : +8.28 (c = 0.29, MeOH). HRMS: found 346.1682  $[\text{M}+\text{H}]^+$ , calculated for  $[\text{C}_{16}\text{H}_{27}\text{NO}_5\text{S}+\text{H}]^+$  346.1683.

***N*-[5-(thiophen-3-ethoxy)pentyl]-L-ido-1-deoxynojirimycin (B61)**

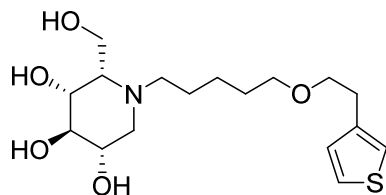

Bromide chain **B41** (0.29 mmol) was subjected to general procedure D with L-ido-1-deoxynojirimycin (0.20 mmol) to provide **B61** (36 mg, 0.099 mmol, yield 49%).  $^1\text{H}$  NMR (400 MHz, MeOD)  $\delta$  7.33 (dd,  $J$  = 4.9, 3.0 Hz, 2H), 7.14 - 7.09 (m, 1H), 7.02 (dd,  $J$  = 4.9, 1.3 Hz, 1H), 4.05 (br s, 1H), 4.01 - 3.95 (m, 3H), 3.90 (t,  $J$  = 3.7 Hz, 1H), 3.68 (t,  $J$  = 6.7 Hz, 2H), 3.56 - 3.47 (m, 2H), 3.52 (t,  $J$  = 6.2 Hz, 2H), 3.38 - 3.28 (m, 3H), 2.94 - 2.88 (m, 2H),

1.93 - 1.70 (m, 2H), 1.67 (dq,  $J$  = 8.3, 6.3 Hz, 2H), 1.53 - 1.37 (m, 2H).  $^{13}\text{C}$  NMR (100 MHz, MeOD)  $\delta$  139.3, 128.1, 124.7, 120.7, 70.9, 70.8, 70.0, 67.5, 66.6, 62.4, 60.0, 53.7, 53.0, 30.2, 28.7, 23.1, 21.8. IR/cm $^{-1}$ : 3355, 2971, 1674, 1394, 1202, 1066.  $[\alpha]_{\text{D}}^{20}$ : +2.52 (c = 0.71, MeOH). HRMS: found 360.1840  $[\text{M}+\text{H}]^+$ , calculated for  $[\text{C}_{17}\text{H}_{29}\text{NO}_5\text{S}+\text{H}]^+$  360.1839.

## S4. Synthetic Procedure and Spectral Data of Iminosugar Library Compounds

The synthesis of deoxynojirimycin congeners was performed similar as described in previous section (procedure D). For non *D-gluco* or *L-ido* configured iminosugars the procedure was slightly adjusted with the use of the proper configured deoxynojirimycin in order to obtain the desired products.<sup>3, 4 & 5</sup> The following list contains the chemical structures and names for all entries in the library. The spectral data are given for unpublished iminosugar derivatives (table S1).

**Table S1: Compound Numbering and Structures of the Iminosugar Library**

| Entry | Name                                                                                                                                                                                                                                         | Structure | Reference or Spectral Data |
|-------|----------------------------------------------------------------------------------------------------------------------------------------------------------------------------------------------------------------------------------------------|-----------|----------------------------|
| C1    | (2 <i>S</i> ,3 <i>S</i> ,4 <i>S</i> ,5 <i>R</i> ,6 <i>S</i> )-1-(5-(((3 <i>S</i> ,5 <i>S</i> ,7 <i>S</i> )-adamantan-1-yl)methoxy)pentyl)-3,4,5-trihydroxy-6-(hydroxymethyl)- <i>N</i> -(2,4,4-trimethylpentan-2-yl)piperidine-2-carboxamide |           | 6                          |
| C2    | (2 <i>S</i> ,3 <i>S</i> ,4 <i>S</i> ,5 <i>R</i> ,6 <i>S</i> )- <i>N</i> -(5-(((3 <i>S</i> ,5 <i>S</i> ,7 <i>S</i> )-adamantan-1-yl)methoxy)pentyl)-3,4,5-trihydroxy-6-(hydroxymethyl)piperidine-2-carboxamide                                |           | 6                          |
| C3    | (2 <i>S</i> ,3 <i>S</i> ,4 <i>S</i> ,5 <i>R</i> ,6 <i>R</i> )-1-(5-(((3 <i>S</i> ,5 <i>S</i> ,7 <i>S</i> )-adamantan-1-yl)methoxy)pentyl)-3,4,5-trihydroxy-6-(hydroxymethyl)piperidine-2-carboxylic acid                                     |           | 6                          |
| C4    | (2 <i>S</i> ,3 <i>S</i> ,4 <i>S</i> ,5 <i>R</i> ,6 <i>S</i> )- <i>N</i> -(5-(((3 <i>S</i> ,5 <i>S</i> ,7 <i>S</i> )-adamantan-1-yl)methoxy)pentyl)-1-butyl-3,4,5-trihydroxy-6-(hydroxymethyl)piperidine-2-carboxamide                        |           | 6                          |
| C5    | (2 <i>S</i> ,3 <i>S</i> ,4 <i>S</i> ,5 <i>R</i> ,6 <i>S</i> )- <i>N</i> ,1-bis(5-(((3 <i>S</i> ,5 <i>S</i> ,7 <i>S</i> )-adamantan-1-yl)methoxy)pentyl)-3,4,5-trihydroxy-6-(hydroxymethyl)piperidine-2-carboxamide                           |           | 6                          |
| C6    | (2 <i>S</i> ,3 <i>R</i> ,4 <i>S</i> ,5 <i>R</i> )-3,4-dihydroxy-5-(hydroxymethyl)- <i>N</i> -pentylpyrrolidine-2-carboxamide                                                                                                                 |           | 7                          |
| C7    | (2 <i>R</i> ,3 <i>R</i> ,4 <i>R</i> ,5 <i>S</i> )-1-butyl-2-(hydroxymethyl)piperidine-3,4,5-triol                                                                                                                                            |           | 8                          |

|     |                                                                                                                                  |                                                                                     |                                                                                                                                                                                                                                                                                                                                                                                                                                                                                                                                                                                                                                                                                           |
|-----|----------------------------------------------------------------------------------------------------------------------------------|-------------------------------------------------------------------------------------|-------------------------------------------------------------------------------------------------------------------------------------------------------------------------------------------------------------------------------------------------------------------------------------------------------------------------------------------------------------------------------------------------------------------------------------------------------------------------------------------------------------------------------------------------------------------------------------------------------------------------------------------------------------------------------------------|
| C8  | (2S,3R,4S,5R)-1-butyl-3,4-dihydroxy-5-(hydroxymethyl)-N-pentylpyrrolidine-2-carboxamide                                          | 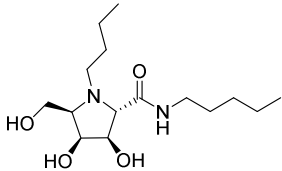   | 7                                                                                                                                                                                                                                                                                                                                                                                                                                                                                                                                                                                                                                                                                         |
| C9  | (2S,3S,4S,5R,6R)-1-butyl-3,4,5-trihydroxy-6-(hydroxymethyl)-N-pentylpiperidine-2-carboxamide                                     |    | 6                                                                                                                                                                                                                                                                                                                                                                                                                                                                                                                                                                                                                                                                                         |
| C10 | (2S,3R,4S,5R)-1-(5-(((3S,5S,7S)-adamantan-1-yl)methoxy)pentyl)-3,4-dihydroxy-5-(hydroxymethyl)-N-pentylpyrrolidine-2-carboxamide |    | 7                                                                                                                                                                                                                                                                                                                                                                                                                                                                                                                                                                                                                                                                                         |
| C11 | (2S,3S,4S,5R,6S)-N-(5-(((3S,5S,7S)-adamantan-1-yl)methoxy)pentyl)-3,4,5-trihydroxy-6-(hydroxymethyl)piperidine-2-carboxamide     |    | 6                                                                                                                                                                                                                                                                                                                                                                                                                                                                                                                                                                                                                                                                                         |
| C12 | (2S,3R,4S,5R)-3,4-dihydroxy-5-(hydroxymethyl)-N-(2,4,4-trimethylpentan-2-yl)pyrrolidine-2-carboxamide                            |   | 7                                                                                                                                                                                                                                                                                                                                                                                                                                                                                                                                                                                                                                                                                         |
| C13 | (2R,3S)-1-butyl-2-(hydroxymethyl)piperidin-3-ol                                                                                  |  | 9                                                                                                                                                                                                                                                                                                                                                                                                                                                                                                                                                                                                                                                                                         |
| C14 | (2S,3R,4S,5R)-1-butyl-3,4-dihydroxy-5-(hydroxymethyl)-N-(2,4,4-trimethylpentan-2-yl)pyrrolidine-2-carboxamide                    |  | 7                                                                                                                                                                                                                                                                                                                                                                                                                                                                                                                                                                                                                                                                                         |
| C15 | (2S,3R,4S,5S)-1-(2-(benzyloxy)ethyl)-2-(hydroxymethyl)piperidine-3,4,5-triol                                                     |  | <sup>1</sup> H NMR (400 MHz, D <sub>2</sub> O) δ 7.51 - 7.31 (m, 5H), 4.58 (s, 2H), 4.22 (s, 1H), 4.17 (s, 1H), 3.99 (m, 2H), 3.94 - 3.85 (m, 2H), 3.82 (s, 1H), 3.74 - 3.43 (m, 4H), 3.36 (d, J = 13.1 Hz, 1H). <sup>13</sup> C NMR (100 MHz, D <sub>2</sub> O) δ 136.86, 128.90, 128.66, 128.61, 73.08, 69.88, 66.98, 66.52, 65.60, 63.00, 59.17, 55.91, 52.75. [α] <sub>D</sub> <sup>25</sup> = +13.0 (c = 0.4, MeOH). IR/cm <sup>-1</sup> : 3341, 1674, 1435, 1200, 1130, 1042. LCMS: 10 - 50, R <sub>t</sub> 3.10 min, [M+H] <sup>+</sup> = 298.13. HRMS : calcd for [C <sub>15</sub> H <sub>23</sub> NO <sub>5</sub> +H] <sup>+</sup> 298.1649, found 298.1656 [M+H] <sup>+</sup> . |
| C16 | (2R,3R,4R,5S)-2-(hydroxymethyl)-1-((2E,6E)-3,7,11-trimethyldodeca-2,6,10-trien-1-yl)piperidine-                                  |  | <sup>1</sup> H NMR (400 MHz, MeOD) δ 5.48 - 5.29 (m, 1H), 5.27 - 5.02 (m, 2H), 4.23 - 4.05 (m, 1H), 4.04 - 3.85 (m, 2H), 3.83 - 3.73 (m, 1H), 3.73 - 3.62                                                                                                                                                                                                                                                                                                                                                                                                                                                                                                                                 |

|     |                                                                                                                                                                                                                                     |  |                                                                                                                                                                                                                                                                                                                                                                                                                                                                                                                                                                              |
|-----|-------------------------------------------------------------------------------------------------------------------------------------------------------------------------------------------------------------------------------------|--|------------------------------------------------------------------------------------------------------------------------------------------------------------------------------------------------------------------------------------------------------------------------------------------------------------------------------------------------------------------------------------------------------------------------------------------------------------------------------------------------------------------------------------------------------------------------------|
|     | 3,4,5-triol                                                                                                                                                                                                                         |  | (m, 1H), 3.62 - 3.51 (m, 1H), 3.46 - 3.33 (m, 2H), 3.05 - 2.88 (m, 1H), 2.86 - 2.66 (m, 1H), 2.40 - 1.91 (m, 8H), 1.91 - 1.46 (m, 12H). <sup>13</sup> C NMR (50 MHz, MeOD) δ 149.1, 137.0, 132.3, 125.5, 124.8, 114.0, 78.6, 69.3, 68.2, 67.3, 55.7, 54.6, 51.7, 41.0, 40.9, 27.9, 27.3, 26.0, 17.9, 17.2, 16.3. [α] <sub>D</sub> <sup>20</sup> = -1.3 (c = 0.9, MeOH). IR/cm <sup>-1</sup> : 3333, 2962, 2924, 1643, 1443, 1381, 1080, 1026. HRMS: calcd for [C <sub>21</sub> H <sub>37</sub> O <sub>4</sub> N+H] <sup>+</sup> 368.2795 found 368.2820 [M+H] <sup>+</sup> . |
| C17 | (2R,3R,4R,5S)-2-(hydroxymethyl)-1-pentylpiperidine-3,4,5-triol                                                                                                                                                                      |  | 8                                                                                                                                                                                                                                                                                                                                                                                                                                                                                                                                                                            |
| C18 | N-((3S,5S,7S)-adamantan-1-yl)-6-((2R,3R,4R,5S)-3,4,5-trihydroxy-2-(hydroxymethyl)piperidin-1-yl)hexanamide                                                                                                                          |  | 10                                                                                                                                                                                                                                                                                                                                                                                                                                                                                                                                                                           |
| C19 | (2R,3R,4R,5S)-1-(5-butoxypentyl)-2-(hydroxymethyl)piperidine-3,4,5-triol                                                                                                                                                            |  | 8                                                                                                                                                                                                                                                                                                                                                                                                                                                                                                                                                                            |
| C20 | (2R,3R,4R,5S)-2-(hydroxymethyl)-1-(5-(pentyloxy)pentyl)piperidine-3,4,5-triol                                                                                                                                                       |  | 8                                                                                                                                                                                                                                                                                                                                                                                                                                                                                                                                                                            |
| C21 | (2R,3R,4R,5S)-1-(5-(hexyloxy)pentyl)-2-(hydroxymethyl)piperidine-3,4,5-triol                                                                                                                                                        |  | 8                                                                                                                                                                                                                                                                                                                                                                                                                                                                                                                                                                            |
| C22 | (2S,3R,4R,5S)-1-(5-(((3S,8S,9S,10R,13R,14S,17R)-10,13-dimethyl-17-((R)-6-methylheptan-2-yl)-2,3,4,7,8,9,10,11,12,13,14,15,16,17-tetradecahydro-1H-cyclopenta[a]phenanthren-3-yl)oxy)pentyl)-2-(hydroxymethyl)piperidine-3,4,5-triol |  | 10                                                                                                                                                                                                                                                                                                                                                                                                                                                                                                                                                                           |
| C23 | (2R,3R,4R,5S)-1-(5-(heptyloxy)pentyl)-2-(hydroxymethyl)piperidine-3,4,5-triol                                                                                                                                                       |  | 8                                                                                                                                                                                                                                                                                                                                                                                                                                                                                                                                                                            |



|     |                                                                                                          |  |                                                                                                                                                                                                                                                                                                                                                                                                                                                                                                                                                                                                                                                                                                                                        |
|-----|----------------------------------------------------------------------------------------------------------|--|----------------------------------------------------------------------------------------------------------------------------------------------------------------------------------------------------------------------------------------------------------------------------------------------------------------------------------------------------------------------------------------------------------------------------------------------------------------------------------------------------------------------------------------------------------------------------------------------------------------------------------------------------------------------------------------------------------------------------------------|
| C24 | (2S,3S,4R,5R)-1-(5-(((3S,5S,7S)-adamantan-1-yl)methoxy)pentyl)-2-(hydroxymethyl)piperidine-3,4,5-triol   |  | <sup>1</sup> H NMR (400 MHz, D <sub>2</sub> O) δ 4.14 (s, 1H), 4.08 - 3.94 (m, 2H), 3.94 - 3.80 (m, 2H), 3.39 (t, <i>J</i> = 6.2 Hz, 2H), 3.31 - 3.10 (m, 5H), 2.97 (s, 2H), 1.91 (s, 3H), 1.63 (m, 10H), 1.49 (s, 6H), 1.42 - 1.30 (m, 2H). <sup>13</sup> C NMR (100 MHz, D <sub>2</sub> O) δ 81.7, 71.4, 69.5, 64.7, 63.8, 60.3, 53.6, 53.0, 48.9, 40.0, 37.0, 33.8, 28.4, 28.2, 22.8, 22.2. [α] <sub>D</sub> <sup>25</sup> = +3.5 (c = 1.3, MeOH). IR/cm <sup>-1</sup> : 3368, 2901, 2847, 1670, 1454, 1188, 1134, 1080. LCMS: 10-50, <i>R</i> <sub>t</sub> 9.55 min, [M+H] <sup>+</sup> = 398.33. HRMS : calcd for [C <sub>22</sub> H <sub>39</sub> NO <sub>5</sub> +H] <sup>+</sup> 398.2901, found 398.2900 [M+H] <sup>+</sup> . |
| C25 | (2R,3R,4R,5S)-2-(hydroxymethyl)-1-(5-(octyloxy)pentyl)piperidine-3,4,5-triol                             |  | 8                                                                                                                                                                                                                                                                                                                                                                                                                                                                                                                                                                                                                                                                                                                                      |
| C26 | (2S,3R,4R,5S)-2-(hydroxymethyl)-1-(5-(neopentyloxy)pentyl)piperidine-3,4,5-triol                         |  | <sup>1</sup> H NMR (400 MHz, MeOD) δ 3.89 (d, <i>J</i> = 5.3 Hz, 2H), 3.82 (dd, <i>J</i> = 7.2, 4.2 Hz, 1H), 3.71 - 3.64 (m, 1H), 3.56 (t, <i>J</i> = 7.0 Hz, 1H), 3.43 (t, <i>J</i> = 6.3 Hz, 1H), 3.27 - 3.18 (m, 1H), 3.07 (s, 2H), 3.10 - 2.87 (m, 4H), 1.82 - 1.53 (m, 4H), 1.51 - 1.37 (m, 2H), 0.90 (s, 9H). <sup>13</sup> C NMR (100 MHz, MeOD) δ 82.4, 72.4, 72.3, 70.3, 64.0, 55.8, 55.3, 53.3, 32.9, 30.4, 26.7, 24.8, 13.3. IR/cm <sup>-1</sup> : 3369, 2935, 2860, 1066. LC/MS analysis: <i>R</i> <sub>t</sub> 4.98 min (linear gradient 10-90% B), ES: = 320.3 [M+H] <sup>+</sup> . HRMS : calcd for [C <sub>16</sub> H <sub>33</sub> O <sub>5</sub> N+H] <sup>+</sup> 320.2432 found 320.2431 [M+H] <sup>+</sup> .      |
| C27 | (2R,3R,4R,5S)-2-(hydroxymethyl)-1-(5-(nonyloxy)pentyl)piperidine-3,4,5-triol                             |  | 8                                                                                                                                                                                                                                                                                                                                                                                                                                                                                                                                                                                                                                                                                                                                      |
| C28 | (2R,3S,4R,5R,6R)-2-(4-(((3R,5R,7R)-adamantan-1-yl)methoxy)butyl)-6-(hydroxymethyl)piperidine-3,4,5-triol |  | 11                                                                                                                                                                                                                                                                                                                                                                                                                                                                                                                                                                                                                                                                                                                                     |
| C29 | (2R,3R,4R,5S)-1-hexyl-2-(hydroxymethyl)piperidine-3,4,5-triol                                            |  | 8                                                                                                                                                                                                                                                                                                                                                                                                                                                                                                                                                                                                                                                                                                                                      |

|     |                                                                                                                                 |  |    |
|-----|---------------------------------------------------------------------------------------------------------------------------------|--|----|
| C30 | (2R,3S,4S,5R)-2-((E)-5-(((3R,5R,7R)-adamantan-1-yl)methoxy)pent-2-en-1-yl)piperidine-3,4,5-triol                                |  | 11 |
| C31 | (2R,3R,4R,5S)-1-heptyl-2-(hydroxymethyl)piperidine-3,4,5-triol                                                                  |  | 8  |
| C32 | (2R,3R,4R,5S)-1-(6-((3R,5R,7R)-adamantan-1-yl)hexyl)-2-(hydroxymethyl)piperidine-3,4,5-triol                                    |  | 10 |
| C33 | (2R,3R,4R,5S)-2-(hydroxymethyl)-1-octylpiperidine-3,4,5-triol                                                                   |  | 8  |
| C34 | (2S,3R,4S,5R)-N-(5-(((3S,5S,7S)-adamantan-1-yl)methoxy)pentyl)-1-butyl-3,4-dihydroxy-5-(hydroxymethyl)pyrrolidine-2-carboxamide |  | 7  |
| C35 | (2R,3R,4R,5S)-1-(5-((3-fluoro-[1,1'-biphenyl]-4-yl)methoxy)pentyl)-2-(hydroxymethyl)piperidine-3,4,5-triol                      |  | 10 |
| C36 | (2S,3S,4S,5R,6R)-3,4,5-trihydroxy-6-(hydroxymethyl)-N-pentylpiperidine-2-carboxamide                                            |  | 6  |
| C37 | (2R,3R,4R,5S)-1-(5-((2-fluoro-[1,1'-biphenyl]-4-yl)methoxy)pentyl)-2-(hydroxymethyl)piperidine-3,4,5-triol                      |  | 10 |
| C38 | (2S,3R,4S,5R)-N,1-bis(5-(((3S,5S,7S)-adamantan-1-yl)methoxy)pentyl)-3,4-dihydroxy-5-(hydroxymethyl)pyrrolidine-2-carboxamide    |  | 7  |
| C39 | (2S,3R,4R,5S)-2-(hydroxymethyl)-1-(5-((3-(trifluoromethyl)-[1,1'-biphenyl]-4-yl)methoxy)pentyl)piperidine-3,4,5-triol           |  | 10 |

|     |                                                                                                                         |  |                                                                                                                                                                                                                                                                                                                                                                                                                                                                                                                                                                                             |
|-----|-------------------------------------------------------------------------------------------------------------------------|--|---------------------------------------------------------------------------------------------------------------------------------------------------------------------------------------------------------------------------------------------------------------------------------------------------------------------------------------------------------------------------------------------------------------------------------------------------------------------------------------------------------------------------------------------------------------------------------------------|
| C40 | (2R,3R,4S,5R)-1-butyl-3,4-dihydroxy-5-(hydroxymethyl)pyrrolidine-2-carboxamide                                          |  | 7                                                                                                                                                                                                                                                                                                                                                                                                                                                                                                                                                                                           |
| C41 | (2S,3R,4R,5S)-2-(hydroxymethyl)-1-(5-((2-(trifluoromethyl)-[1,1'-biphenyl]-4-yl)methoxy)pentyl)piperidine-3,4,5-triol   |  | 10                                                                                                                                                                                                                                                                                                                                                                                                                                                                                                                                                                                          |
| C42 | (2R,3R,4S,5R)-1-(5-(((3R,5R,7R)-adamantan-1-yl)methoxy)pentyl)-3,4-dihydroxy-5-(hydroxymethyl)pyrrolidine-2-carboxamide |  | 7                                                                                                                                                                                                                                                                                                                                                                                                                                                                                                                                                                                           |
| C43 | (2S,3R,4R,5S)-1-(5-((3-fluoro-[1,1'-biphenyl]-4-yl)methoxy)pentyl)-2-(hydroxymethyl)piperidine-3,4,5-triol              |  | 10                                                                                                                                                                                                                                                                                                                                                                                                                                                                                                                                                                                          |
| C44 | (2S,3R,4S,5R)-3,4-dihydroxy-5-(hydroxymethyl)-N-pentylpyrrolidine-2-carboxamide                                         |  | 7                                                                                                                                                                                                                                                                                                                                                                                                                                                                                                                                                                                           |
| C45 | (2S,3R,4R,5S)-1-(5-((2-fluoro-[1,1'-biphenyl]-4-yl)methoxy)pentyl)-2-(hydroxymethyl)piperidine-3,4,5-triol              |  | 10                                                                                                                                                                                                                                                                                                                                                                                                                                                                                                                                                                                          |
| C46 | (2R,3R,4S,5R)-1-butyl-3,4-dihydroxy-5-(hydroxymethyl)-N-pentylpyrrolidine-2-carboxamide                                 |  | 7                                                                                                                                                                                                                                                                                                                                                                                                                                                                                                                                                                                           |
| C47 | (2R,3S,4S,5R)-1-(5-(benzyloxy)pentyl)-2-(hydroxymethyl)piperidine-3,4,5-triol                                           |  | <sup>1</sup> H NMR (400 MHz, MeOD) δ 7.42 -7.24 (m, 5H), 4.60 (s, 2H), 4.05 - 3.76 (m, 5H), 3.76 - 3.27 (m, 5H). <sup>13</sup> C NMR (100 MHz, MeOD) δ 138.7, 129.6, 129.1, 129.0, 74.1, 71.63, 68.7, 68.6, 64.5, 64.1, 60.2, 54.6, 54.1. [α] <sub>D</sub> <sup>20</sup> = -0.02 (c = 0.5, MeOD). IR/cm <sup>-1</sup> : 3363, 1674, 1203, 1134, 1072. LC/MS analysis: R <sub>t</sub> 3.03 min (linear gradient 10-90% B), ES : = 298.1 [M+H] <sup>+</sup> . HRMS : calcd for [C <sub>15</sub> H <sub>23</sub> O <sub>5</sub> N+H] <sup>+</sup> 298.1655 found 298.1660 [M+H] <sup>+</sup> . |

|     |                                                                                                                                  |                                                                                     |                                                                                                                                                                                                                                                                                                                                                                                                                                                                                                                                                                                                                                                 |
|-----|----------------------------------------------------------------------------------------------------------------------------------|-------------------------------------------------------------------------------------|-------------------------------------------------------------------------------------------------------------------------------------------------------------------------------------------------------------------------------------------------------------------------------------------------------------------------------------------------------------------------------------------------------------------------------------------------------------------------------------------------------------------------------------------------------------------------------------------------------------------------------------------------|
| C48 | (2R,3R,4S,5R)-1-(5-(((3R,5R,7R)-adamantan-1-yl)methoxy)pentyl)-3,4-dihydroxy-5-(hydroxymethyl)-N-pentylpyrrolidine-2-carboxamide | 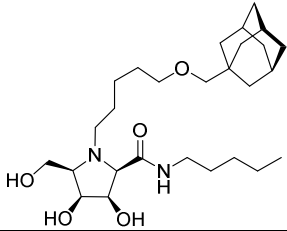   | 7                                                                                                                                                                                                                                                                                                                                                                                                                                                                                                                                                                                                                                               |
| C49 | (2R,3S,4S,5R)-2-(hydroxymethyl)-1-(5-(neopentyloxy)pentyl)piperidine-3,4,5-triol                                                 |    | <sup>1</sup> H NMR (400 MHz, MeOD) δ 4.08 (m, 4H), 3.84 (br s, 1H), 3.53 - 3.32 (m, 7H), 3.08 (s, 2H), 1.87 - 1.73 (m, 2H), 1.69 - 1.59 (m, 2H), 1.51 - 1.43 (m, 2H), 0.91 (s, 9H). <sup>13</sup> C NMR (100 MHz, MeOD) δ 82.2, 71.8, 71.7, 68.6, 68.1, 63.4, 60.8, 54.4, 53.9, 29.9, 26.7, 24.1, 23.1. [α] <sub>D</sub> <sup>20</sup> = -0.04 (c = 0.6, MeOD). IR/cm <sup>-1</sup> : 3444, 1680, 1199, 1134, 1068. LC/MS analysis: R <sub>t</sub> 4.51 min (linear gradient 10-90% B), ES: = 320.3 [M+H] <sup>+</sup> . HRMS : calcd for [C <sub>16</sub> H <sub>33</sub> O <sub>5</sub> N+H] <sup>+</sup> found 320.2437 [M+H] <sup>+</sup> . |
| C50 | (2R,3R,4S,5R)-3,4-dihydroxy-5-(hydroxymethyl)-N-(2,4,4-trimethylpentan-2-yl)pyrrolidine-2-carboxamide                            |   | 7                                                                                                                                                                                                                                                                                                                                                                                                                                                                                                                                                                                                                                               |
| C51 | (2R,3S,4S,5R)-2-(hydroxymethyl)-1-nonylpiperidine-3,4,5-triol                                                                    |  | <sup>1</sup> H NMR (400 MHz, MeOD) δ 4.03 - 3.87 (m, 4H), 3.82 (br s, 1H), 3.52 - 3.26 (m, 5H), 1.85 - 1.67 (m, 2H), 1.41 - 1.28 (m, 12H), 0.90 (t, J = 7.0 Hz, 3H). <sup>13</sup> C NMR (100 MHz, MeOD) δ 71.8, 68.8, 68.0, 63.6, 60.7, 54.7, 53.7, 33.0 - 23.7, 14.4. [α] <sub>D</sub> <sup>20</sup> = -0.05 (c = 0.5, MeOD). IR/cm <sup>-1</sup> : 3363, 1670, 1203, 1134, 1068. LC/MS analysis: R <sub>t</sub> 5.02 min (linear gradient 10-90% B), ES: = 290.3 [M+H] <sup>+</sup> . HRMS: calcd for [C <sub>16</sub> H <sub>31</sub> O <sub>4</sub> N+H] <sup>+</sup> 290.2331 found 290.2335 [M+H] <sup>+</sup> .                         |
| C52 | (2R,3R,4S,5R)-1-butyl-3,4-dihydroxy-5-(hydroxymethyl)-N-(2,4,4-trimethylpentan-2-yl)pyrrolidine-2-carboxamide                    |  | 7                                                                                                                                                                                                                                                                                                                                                                                                                                                                                                                                                                                                                                               |
| C53 | (2R,3S,4S,5R)-1-butyl-2-(hydroxymethyl)piperidine-3,4,5-triol                                                                    |  | <sup>1</sup> H NMR (400 MHz, MeOD) δ 4.02 - 3.76 (m, 5H), 3.52 - 3.22 (m, 5H), 1.77 - 1.65 (m, 2H), 1.47 - 1.37 (m, 2H), 1.01 (t, J = 7.4 Hz, 3H). <sup>13</sup> C NMR (100 MHz, MeOD) δ 72.6, 69.0, 64.3, 63.9, 61.1, 54.7, 25.7, 21.1, 14.0. [α] <sub>D</sub> <sup>20</sup> = -0.01 (c = 0.2, MeOD). IR/cm <sup>-1</sup> : 3363, 1670, 1203, 1134, 1068. LC/MS analysis:                                                                                                                                                                                                                                                                      |

|     |                                                                                                            |  |                                                                                                                                                                                                                                                                                                                                                                                                                                                                                                                                                                                                                                                                                                            |
|-----|------------------------------------------------------------------------------------------------------------|--|------------------------------------------------------------------------------------------------------------------------------------------------------------------------------------------------------------------------------------------------------------------------------------------------------------------------------------------------------------------------------------------------------------------------------------------------------------------------------------------------------------------------------------------------------------------------------------------------------------------------------------------------------------------------------------------------------------|
|     |                                                                                                            |  | $R_t$ 0.73 min (linear gradient 10-90% B), ES: = 220.0 [M+H] <sup>+</sup> . HRMS: calcd for [C <sub>10</sub> H <sub>21</sub> O <sub>4</sub> N+H] <sup>+</sup> 220.1549 found 220.1551 [M+H] <sup>+</sup> .                                                                                                                                                                                                                                                                                                                                                                                                                                                                                                 |
| C54 | (2S,3R,4S,5R)-2-(hydroxymethyl)-1-((2E,6E)-3,7,11-trimethyldodeca-2,6,10-trien-1-yl)piperidine-3,4,5-triol |  | <sup>1</sup> H NMR (400 MHz, MeOD) δ 5.32 (t, <i>J</i> = 6.9, 1H), 5.17 - 5.01 (m, 2H), 3.91 (d, <i>J</i> = 5.2, 2H), 3.87 - 3.78 (m, 1H), 3.73 - 3.63 (m, 1H), 3.63 - 3.46 (m, 3H), 3.26 - 3.12 (m, 1H), 3.07 - 2.93 (m, 1H), 2.92 - 2.71 (m, 1H), 2.22 - 1.95 (m, 8H), 1.73 (s, 3H), 1.67 (s, 3H), 1.61 (s, 3H), 1.60 (s, 3H). <sup>13</sup> C NMR (100 MHz, MeOD) δ 136.7, 132.3, 125.6, 125.1, 72.7, 70.6, 64.1, 59.1, 53.1, 53.0, 41.1, 41.0, 27.9, 27.5, 26.0, 17.9, 16.9, 16.3. IR/cm <sup>-1</sup> : 3317, 2962, 2916, 2862, 1666, 1443, 1381, 1242, 1072, 1042, 980. MS: found 368.5 [M+H] <sup>+</sup> , calculated for [C <sub>21</sub> H <sub>37</sub> O <sub>4</sub> N+H] <sup>+</sup> 368.3. |
| C55 | (2S,3R,4S,5R)-2-(hydroxymethyl)-1-pentylpiperidine-3,4,5-triol                                             |  | 8                                                                                                                                                                                                                                                                                                                                                                                                                                                                                                                                                                                                                                                                                                          |
| C56 | (2S,3R,4R,5S)-1-(6-(((3S,5S,7S)-adamantan-1-yl)methoxy)hexyl)-2-(hydroxymethyl)piperidine-3,4,5-triol      |  | 3                                                                                                                                                                                                                                                                                                                                                                                                                                                                                                                                                                                                                                                                                                          |
| C57 | (2S,3R,4R,5S)-1-(5-butoxy)pentyl)-2-(hydroxymethyl)piperidine-3,4,5-triol                                  |  | 8                                                                                                                                                                                                                                                                                                                                                                                                                                                                                                                                                                                                                                                                                                          |
| C58 | (2R,3R,4R,5S)-2-(hydroxymethyl)-1-(5-(naphthalen-2-ylmethoxy)pentyl)piperidine-3,4,5-triol                 |  | 10                                                                                                                                                                                                                                                                                                                                                                                                                                                                                                                                                                                                                                                                                                         |
| C59 | (2S,3R,4R,5S)-2-(hydroxymethyl)-1-(5-(pentyloxy)pentyl)piperidine-3,4,5-triol                              |  | 8                                                                                                                                                                                                                                                                                                                                                                                                                                                                                                                                                                                                                                                                                                          |
| C60 | (2S,3R,4R,5S)-2-(hydroxymethyl)-1-(5-(naphthalen-2-ylmethoxy)pentyl)piperidine-3,4,5-triol                 |  | 10                                                                                                                                                                                                                                                                                                                                                                                                                                                                                                                                                                                                                                                                                                         |
| C61 | (2S,3R,4R,5S)-1-(5-(hexyloxy)pentyl)-2-(hydroxymethyl)piperidine-3,4,5-triol                               |  | 8                                                                                                                                                                                                                                                                                                                                                                                                                                                                                                                                                                                                                                                                                                          |

|     |                                                                                                                                                                |  |    |
|-----|----------------------------------------------------------------------------------------------------------------------------------------------------------------|--|----|
| C62 | (2R,3R,4R,5S)-1-(5-([1,1'-biphenyl]-4-ylmethoxy)pentyl)-2-(hydroxymethyl)piperidine-3,4,5-triol                                                                |  | 10 |
| C63 | (2S,3R,4R,5S)-1-(5-(heptyloxy)pentyl)-2-(hydroxymethyl)piperidine-3,4,5-triol                                                                                  |  | 8  |
| C64 | (2S,3R,4R,5S)-1-(5-([1,1'-biphenyl]-4-ylmethoxy)pentyl)-2-(hydroxymethyl)piperidine-3,4,5-triol                                                                |  | 10 |
| C65 | (2S,3R,4R,5S)-2-(hydroxymethyl)-1-(5-(octyloxy)pentyl)piperidine-3,4,5-triol                                                                                   |  | 8  |
| C66 | (2R,3R,4R,5S)-2-(hydroxymethyl)-1-(5-(phenanthren-9-ylmethoxy)pentyl)piperidine-3,4,5-triol                                                                    |  | 10 |
| C67 | (2S,3R,4R,5S)-2-(hydroxymethyl)-1-(5-(nonyloxy)pentyl)piperidine-3,4,5-triol                                                                                   |  | 8  |
| C68 | (2S,2'S,3R,3'R,4R,4'R,5S,5'S)-1,1'-((2-((3S,5S,7S)-adamantan-1-yl)propane-1,3-diyl)bis(oxy))bis(pentane-5,1-diyl))bis(2-(hydroxymethyl)piperidine-3,4,5-triol) |  | 12 |
| C69 | (2S,3R,4R,5S)-1-hexyl-2-(hydroxymethyl)piperidine-3,4,5-triol                                                                                                  |  | 8  |
| C70 | N-((3R,5R,7R)-adamantan-1-yl)-6-((2S,3R,4R,5S)-3,4,5-trihydroxy-2-(hydroxymethyl)piperidin-1-yl)hexanamide                                                     |  | 10 |
| C71 | (2S,3R,4R,5S)-1-heptyl-2-(hydroxymethyl)piperidine-3,4,5-triol                                                                                                 |  | 8  |
| C72 | (2S,3R,4R,5S)-2-(hydroxymethyl)-1-octylpiperidine-3,4,5-triol                                                                                                  |  | 8  |

|     |                                                                                                                                              |                                                                                     |                                                                                                                                                                                                                                                                                                                                                                                                                                                                                                                                                                                                                                                                                                                                                                                                                                                                                |
|-----|----------------------------------------------------------------------------------------------------------------------------------------------|-------------------------------------------------------------------------------------|--------------------------------------------------------------------------------------------------------------------------------------------------------------------------------------------------------------------------------------------------------------------------------------------------------------------------------------------------------------------------------------------------------------------------------------------------------------------------------------------------------------------------------------------------------------------------------------------------------------------------------------------------------------------------------------------------------------------------------------------------------------------------------------------------------------------------------------------------------------------------------|
| C73 | (2S,3S,4S,5R,6R)-1-butyl-3,4,5-trihydroxy-6-(hydroxymethyl)-N-pentylpiperidine-2-carboxamide                                                 | 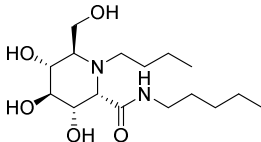   | 6                                                                                                                                                                                                                                                                                                                                                                                                                                                                                                                                                                                                                                                                                                                                                                                                                                                                              |
| C74 | (2R,3R,4S,5R)-N-(5-(((3R,5R,7R)-adamantan-1-yl)methoxy)pentyl)-1-butyl-3,4-dihydroxy-5-(hydroxymethyl)pyrrolidine-2-carboxamide              |    | 7                                                                                                                                                                                                                                                                                                                                                                                                                                                                                                                                                                                                                                                                                                                                                                                                                                                                              |
| C75 | (2R,3R,4S,5R)-N,1-bis(5-(((3R,5R,7R)-adamantan-1-yl)methoxy)pentyl)-3,4-dihydroxy-5-(hydroxymethyl)pyrrolidine-2-carboxamide                 |    | 7                                                                                                                                                                                                                                                                                                                                                                                                                                                                                                                                                                                                                                                                                                                                                                                                                                                                              |
| C76 | (1R,3R,8S)-4-(5-(((2R,3R,4R,5S)-3,4,5-trihydroxy-2-(hydroxymethyl)piperidin-1-yl)pentyl)-4-azatricyclo[4.3.1.1 <sup>3,8</sup> ]undecan-5-one |    | <sup>1</sup> H NMR (400 MHz, MeOD) δ 4.02 (dd, <i>J</i> = 11.6, 76.8, 2H), 3.85 - 3.74 (m, 3H), 3.68 - 3.59 (m, 1H), 3.54 - 3.30 (m, 6H), 3.16-3.07 (m, 1H), 2.79 ( <i>t</i> , <i>J</i> = 4.0, 1H), 2.08 - 2.01 (m, 4H), 1.88 (s, 4H), 1.82 (d, <i>J</i> = 13.6, 4H), 1.77 (s, 2H), 1.62 ( <i>t</i> , <i>J</i> = 7.2, 2H), 1.45 - 1.37 (m, 2H). <sup>13</sup> C NMR (100 MHz, MeOD) δ 181.0, 68.4, 67.3, 67.0, 60.6, 58.2, 55.1, 54.5, 49.2, 46.8, 43.4, 36.2, 36.2, 34.9, 31.7, 27.7, 27.1, 24.3. [α] <sub>D</sub> <sup>20</sup> = - 0.00 (c = 0.4, MeOD). IR/cm <sup>-1</sup> : 3363, 1666, 1203, 1134, 1091, 1029. LC/MS analysis: <i>R</i> <sub>t</sub> 4.02 min (linear gradient 10-90% B), ES: = 397.3 [M+H] <sup>+</sup> . HRMS: calcd for [C <sub>21</sub> H <sub>36</sub> O <sub>5</sub> N <sub>2</sub> +H] <sup>+</sup> 397.2702 found 397.2702 [M+H] <sup>+</sup> . |
| C77 | (2R,3S,4S,5S)-1-(5-(((3R,5R,7R)-adamantan-1-yl)methoxy)pentyl)-3,4-dihydroxy-5-(hydroxymethyl)pyrrolidine-2-carboxamide                      |  | 7                                                                                                                                                                                                                                                                                                                                                                                                                                                                                                                                                                                                                                                                                                                                                                                                                                                                              |
| C78 | (2R,3S,4S,5S)-3,4-dihydroxy-5-(hydroxymethyl)-N-pentylpyrrolidine-2-carboxamide                                                              |  | 7                                                                                                                                                                                                                                                                                                                                                                                                                                                                                                                                                                                                                                                                                                                                                                                                                                                                              |
| C79 | (2R,3R,4R,5S)-1-(5-(benzyloxy)pentyl)-2-(hydroxymethyl)piperidine-3,4,5-triol                                                                |  | 10                                                                                                                                                                                                                                                                                                                                                                                                                                                                                                                                                                                                                                                                                                                                                                                                                                                                             |

|     |                                                                                                                                  |                                                                                     |                                                                                                                                                                                                                                                                                                                                                                                                                                                                                                                                                                                                                                                                                                                                                                                                                                                                                                                                                                                                                                  |
|-----|----------------------------------------------------------------------------------------------------------------------------------|-------------------------------------------------------------------------------------|----------------------------------------------------------------------------------------------------------------------------------------------------------------------------------------------------------------------------------------------------------------------------------------------------------------------------------------------------------------------------------------------------------------------------------------------------------------------------------------------------------------------------------------------------------------------------------------------------------------------------------------------------------------------------------------------------------------------------------------------------------------------------------------------------------------------------------------------------------------------------------------------------------------------------------------------------------------------------------------------------------------------------------|
| C80 | (2R,3S,4S,5S)-1-butyl-3,4-dihydroxy-5-(hydroxymethyl)-N-pentylpyrrolidine-2-carboxamide                                          | 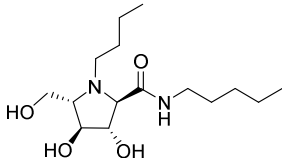   | 7                                                                                                                                                                                                                                                                                                                                                                                                                                                                                                                                                                                                                                                                                                                                                                                                                                                                                                                                                                                                                                |
| C81 | (2S,3R,4R,5S)-1-(5-(benzyloxy)pentyl)-2-(hydroxymethyl)piperidine-3,4,5-triol                                                    |    | 10                                                                                                                                                                                                                                                                                                                                                                                                                                                                                                                                                                                                                                                                                                                                                                                                                                                                                                                                                                                                                               |
| C82 | (2R,3S,4S,5S)-1-(5-(((3R,5R,7R)-adamantan-1-yl)methoxy)pentyl)-3,4-dihydroxy-5-(hydroxymethyl)-N-pentylpyrrolidine-2-carboxamide |    | 7                                                                                                                                                                                                                                                                                                                                                                                                                                                                                                                                                                                                                                                                                                                                                                                                                                                                                                                                                                                                                                |
| C83 | (2R,3R,4R,5S)-1-(2-(2-(((3R,5R,7R)-adamantan-1-yl)methoxy)ethoxy)ethyl)-2-(hydroxymethyl)piperidine-3,4,5-triol                  |    | <sup>1</sup> H NMR (400 MHz, CDCl <sub>3</sub> ) δ 3.94 (dd, <i>J</i> = 12.2, 2.6 Hz, 1H), 3.86 (dd, <i>J</i> = 12.2, 2.5 Hz, 1H), 3.66 (t, <i>J</i> = 5.4 Hz, 2H), 3.63 - 3.58 (m, 2H), 3.57 - 3.52 (m, 3H), 3.50 (ddd, <i>J</i> = 10.4, 9.3, 4.8 Hz, 1H), 3.39 (t, <i>J</i> = 9.3 Hz, 1H), 3.17 (t, <i>J</i> = 9.1 Hz, 1H), 3.15 - 3.06 (m, 2H), 2.81 (dt, <i>J</i> = 14.4, 4.8 Hz, 1H), 2.40 (t, <i>J</i> = 11.0 Hz, 1H), 2.33 (dt, <i>J</i> = 9.5, 2.4 Hz, 1H), 1.95 (s, 3H), 1.82 - 1.64 (m, 6H), 1.57 (m, 6H). <sup>13</sup> C NMR (100 MHz, MeOD) δ 83.5, 80.2, 72.2, 71.5, 71.4, 70.3, 69.1, 67.7, 58.8, 58.2, 52.8, 40.7, 38.3, 35.1, 29.7. [α] <sub>D</sub> <sup>20</sup> = -0.01 (c = 1.3, MeOD). IR/cm <sup>-1</sup> : 3363, 2900, 2846, 1454, 1246, 1091, 1037, 1014. LC/MS analysis: <i>R</i> <sub>t</sub> 5.20 min (linear gradient 10-90% B), ES: = 400.3 [M+H] <sup>+</sup> . HRMS: calcd for [C <sub>21</sub> H <sub>37</sub> NO <sub>6</sub> +H] <sup>+</sup> : 400.2699. found 400.2700 [M+H] <sup>+</sup> . |
| C84 | (2R,3S,4S,5S)-3,4-dihydroxy-5-(hydroxymethyl)-N-(2,4,4-trimethylpentan-2-yl)pyrrolidine-2-carboxamide                            |  | 7                                                                                                                                                                                                                                                                                                                                                                                                                                                                                                                                                                                                                                                                                                                                                                                                                                                                                                                                                                                                                                |
| C85 | (2S,3R,4R,5S)-1-(2-(2-(((3S,5S,7S)-adamantan-1-yl)methoxy)ethoxy)ethyl)-2-(hydroxymethyl)piperidine-3,4,5-triol                  |  | <sup>1</sup> H NMR (400 MHz, CDCl <sub>3</sub> ) δ 4.03-3.86 (br m, 6H), 3.82 (br s, 1H), 3.68 - 3.44 (m, 9H), 3.04 (s, 2H), 1.95 (b s, 3H), 1.78 - 1.67 (m, 6H), 1.57 (m, 6H). <sup>13</sup> C NMR (100 MHz, CDCl <sub>3</sub> ) δ 83.2, 71.9, 71.7, 71.2, 68.9, 68.8, 65.9, 64.2, 59.9, 54.1, 40.3, 37.9, 29.3. [α] <sub>D</sub> <sup>20</sup> = 0.03 (c = 0.7, MeOD). IR/cm <sup>-1</sup> : 3313, 2900, 2846, 1674, 1203, 1134, 1080. LC/MS analysis: <i>R</i> <sub>t</sub>                                                                                                                                                                                                                                                                                                                                                                                                                                                                                                                                                   |



|     |                                                                                                                                                        |  |                                                                                                                                                                                                                                                                                                                                                                                                                                                                                                                                                                                                                                                                                                                                                                                                                                                                                                                                                                                                                                   |
|-----|--------------------------------------------------------------------------------------------------------------------------------------------------------|--|-----------------------------------------------------------------------------------------------------------------------------------------------------------------------------------------------------------------------------------------------------------------------------------------------------------------------------------------------------------------------------------------------------------------------------------------------------------------------------------------------------------------------------------------------------------------------------------------------------------------------------------------------------------------------------------------------------------------------------------------------------------------------------------------------------------------------------------------------------------------------------------------------------------------------------------------------------------------------------------------------------------------------------------|
|     |                                                                                                                                                        |  | 5.32 min (linear gradient 10-90% B), ES: = 400.3 [M+H] <sup>+</sup> . HRMS: calcd for [C <sub>21</sub> H <sub>37</sub> O <sub>6</sub> N+H] <sup>+</sup> 400.2699 found 400.2698 [M+H] <sup>+</sup> .                                                                                                                                                                                                                                                                                                                                                                                                                                                                                                                                                                                                                                                                                                                                                                                                                              |
| C86 | (2R,3S,4S,5S)-1-butyl-3,4-dihydroxy-5-(hydroxymethyl)-N-(2,4,4-trimethylpentan-2-yl)pyrrolidine-2-carboxamide                                          |  |                                                                                                                                                                                                                                                                                                                                                                                                                                                                                                                                                                                                                                                                                                                                                                                                                                                                                                                                                                                                                                   |
| C87 | (2S,3R,4R,5S)-1-(2-(2-(cyclohexylmethoxy)ethoxy)ethyl)-2-(hydroxymethyl)piperidine-3,4,5-triol                                                         |  | <sup>1</sup> H NMR (400 MHz, CDCl <sub>3</sub> ) δ 4.08 (d, <i>J</i> = 12.8 Hz, 1H), 3.98 (dd, <i>J</i> = 12.5, 3.0 Hz, 1H), 3.88 (t, <i>J</i> = 4.8 Hz, 2H), 3.71 (ddd, <i>J</i> = 11.0, 9.2, 5.0 Hz, 1H), 3.67 - 3.58 (m, 6H), 3.55 (dd, <i>J</i> = 12.3, 4.8 Hz, 1H), 3.43 (dt, <i>J</i> = 14.9, 4.9 Hz, 1H), 3.36 (t, <i>J</i> = 9.2 Hz, 1H), 3.29 (d, <i>J</i> = 6.6 Hz, 2H), 3.13 (d, <i>J</i> = 10.0 Hz, 1H), 3.06 (t, <i>J</i> = 11.7 Hz, 1H), 1.81 - 1.65 (m, 4H), 1.63 - 1.56 (m, 1H), 1.33 - 1.19 (m, 4H), 1.01 - 0.88 (m, 2H). <sup>13</sup> C NMR (100 MHz, MeOD) δ 78.3, 78.2, 71.4, 71.30, 68.9, 68.3, 67.8, 65.8, 55.3, 55.1, 53.4, 39.14, 31.11, 27.69, 26.92. [α] <sub>D</sub> <sup>20</sup> = 0.07 (c = 1.2, MeOD). IR/cm <sup>-1</sup> : 3390, 2924, 1670, 1203, 1134, 1091, 1037. LC/MS analysis: <i>R</i> <sub>t</sub> 4.37 min (linear gradient 10-90% B), ES: = 348.3 [M+H] <sup>+</sup> . HRMS: calcd for [C <sub>17</sub> H <sub>33</sub> NO <sub>6</sub> +H] <sup>+</sup> : 348.2386. found: 348.2385. |
| C88 | (2R,3S,4S,5S)-1-(5-(((3R,5R,7R)-adamantan-1-yl)methoxy)pentyl)-3,4-dihydroxy-5-(hydroxymethyl)-N-(2,4,4-trimethylpentan-2-yl)pyrrolidine-2-carboxamide |  |                                                                                                                                                                                                                                                                                                                                                                                                                                                                                                                                                                                                                                                                                                                                                                                                                                                                                                                                                                                                                                   |
| C89 | (2R,3R,4R,5S)-2-(hydroxymethyl)-1-(2-(2-(neopentyloxy)ethoxy)ethyl)piperidine-3,4,5-triol                                                              |  | <sup>1</sup> H NMR (400 MHz, MeOD) δ 3.94 (dd, <i>J</i> = 12.2, 2.7 Hz, 1H), 3.87 (dd, <i>J</i> = 12.2, 2.6 Hz, 1H), 3.71 - 3.66 (m, 2H), 3.64 - 3.61 (m, 2H), 3.59 - 3.56 (m, 2H), 3.51 (ddd, <i>J</i> = 10.6, 9.2, 4.9 Hz, 1H), 3.40 (t, <i>J</i> = 9.4 Hz, 1H), 3.18 (t, <i>J</i> = 9.1 Hz, 1H), 3.17 - 3.11 (m, 3H), 2.93 - 2.77 (m, 1H), 2.44 (t, <i>J</i> = 11.1 Hz, 1H), 2.38 (dt, <i>J</i> = 9.9, 2.3 Hz, 1H), 0.91 (s, 9H). <sup>13</sup> C NMR (100 MHz, MeOD) δ 82.9, 80.1, 72.10, 71.54, 71.2, 70.1, 68.9, 67.8, 58.6, 58.0, 52.9, 27.1. IR/cm <sup>-1</sup> : 3367, 2954, 2904, 2866, 2461, 1658, 1087.                                                                                                                                                                                                                                                                                                                                                                                                              |

|     |                                                                                                                           |  |                                                                                                                                                                                                                                                                                                                                                                                                                                                                                                                                                                                                                                                                           |
|-----|---------------------------------------------------------------------------------------------------------------------------|--|---------------------------------------------------------------------------------------------------------------------------------------------------------------------------------------------------------------------------------------------------------------------------------------------------------------------------------------------------------------------------------------------------------------------------------------------------------------------------------------------------------------------------------------------------------------------------------------------------------------------------------------------------------------------------|
|     |                                                                                                                           |  | 1037. LC/MS analysis: $R_t$ 3.77 min (linear gradient 10-90% B), ES: = 322.2 $[M+H]^+$ . HRMS: calcd for $[C_{15}H_{31}O_6N+H]^+$ 322.2230 found 322.2230 $[M+H]^+$ .                                                                                                                                                                                                                                                                                                                                                                                                                                                                                                     |
| C90 | (2R,3R,4R,5S)-2-(hydroxymethyl)-1-(5-(((2E,6E)-3,7,11-trimethyldodeca-2,6,10-trien-1-yl)oxy)pentyl)piperidine-3,4,5-triol |  | 10                                                                                                                                                                                                                                                                                                                                                                                                                                                                                                                                                                                                                                                                        |
| C91 | (2R,3R,4R,5S)-1-butyl-2-(hydroxymethyl)piperidine-3,4,5-triol                                                             |  | 8                                                                                                                                                                                                                                                                                                                                                                                                                                                                                                                                                                                                                                                                         |
| C92 | (2S,3R,4R,5S)-2-(hydroxymethyl)-1-(5-(((2E,6E)-3,7,11-trimethyldodeca-2,6,10-trien-1-yl)oxy)pentyl)piperidine-3,4,5-triol |  | 10                                                                                                                                                                                                                                                                                                                                                                                                                                                                                                                                                                                                                                                                        |
| C93 | (2S,3R,4R,5S)-1-butyl-2-(hydroxymethyl)piperidine-3,4,5-triol                                                             |  | 8                                                                                                                                                                                                                                                                                                                                                                                                                                                                                                                                                                                                                                                                         |
| C94 | (2R,3S,4S,5R,6S)-3,4,5-trihydroxy-6-(hydroxymethyl)-N-(2,4,4-trimethylpentan-2-yl)piperidine-2-carboxamide                |  | 6                                                                                                                                                                                                                                                                                                                                                                                                                                                                                                                                                                                                                                                                         |
| C95 | (2R,3R,4S,5R)-1-(5-([1,1'-biphenyl]-4-ylmethoxy)pentyl)-2-(hydroxymethyl)piperidine-3,4,5-triol                           |  | $^1H$ NMR (400 MHz, $D_2O$ ) $\delta$ 7.19 - 7.09 (m, 4H), 6.99 (d, $J$ = 8.0 Hz, 2H), 6.93 (dd, $J$ = $J$ = 7.5 Hz, 2H), 6.90 - 6.82 (m, 1H), 4.13 (s, 2H), 4.07 (dd, $J$ = 10.5, 2.1 Hz, 1H), 4.03 - 3.88 (m, 3H), 3.76 (d, $J$ = 12.1 Hz, 1H), 3.20 (d, $J$ = 12.4 Hz, 1H), 3.15 - 2.92 (m, 6H), 1.49 - 1.24 (m, 4H), 1.13 - 0.95 (m, 2H). $^{13}C$ NMR (100 MHz, $D_2O$ ) $\delta$ 140.0, 139.6, 137.1, 128.7, 128.4, 127.2, 126.6, 71.8, 69.6, 68.0, 66.1, 62.9, 61.3, 54.1, 52.8, 51.2, 28.4, 22.6, 21.7. $[\alpha]_D^{20}$ = -2.8 (c = 0.5, MeOH). IR/ $cm^{-1}$ : 3366, 2920, 2862, 1674, 1204, 1134, 1090, 1076. LCMS: 10-50, $R_t$ 7.84 min, $[M+H]^+$ = 416.2. |
| C96 | (2S,3S,4S,5R,6S)-3,4,5-trihydroxy-6-(hydroxymethyl)-N-(2,4,4-trimethylpentan-2-yl)piperidine-2-carboxamide                |  | 6                                                                                                                                                                                                                                                                                                                                                                                                                                                                                                                                                                                                                                                                         |

|      |                                                                                                                                                                   |  |                                                                                                                                                                                                                                                                                                                                                                                                                                                                                                                                                                                                                                                                                                                                                                                    |
|------|-------------------------------------------------------------------------------------------------------------------------------------------------------------------|--|------------------------------------------------------------------------------------------------------------------------------------------------------------------------------------------------------------------------------------------------------------------------------------------------------------------------------------------------------------------------------------------------------------------------------------------------------------------------------------------------------------------------------------------------------------------------------------------------------------------------------------------------------------------------------------------------------------------------------------------------------------------------------------|
| C97  | (2R,3S,4R,5R,6R)-2-(5-(((3R,5R,7R)-adamantan-1-yl)methoxy)pentyl)-6-(hydroxymethyl)piperidine-3,4,5-triol                                                         |  | 11                                                                                                                                                                                                                                                                                                                                                                                                                                                                                                                                                                                                                                                                                                                                                                                 |
| C98  | (2R,3S,4R,5R,6R)-2-(5-(((3R,5R,7R)-adamantan-1-yl)methoxy)pentyl)-6-(hydroxymethyl)-1-nonylpiperidine-3,4,5-triol                                                 |  | 11                                                                                                                                                                                                                                                                                                                                                                                                                                                                                                                                                                                                                                                                                                                                                                                 |
| C99  | (2R,2'R,3R,3'R,4R,4'R,5S,5'S)-1,1'-((((1S,3S,5R,7R)-adamantane-1,3-diyl)bis(methylene))bis(oxy))bis(pentane-5,1-diyl)bis(2-(hydroxymethyl)piperidine-3,4,5-triol) |  | 12                                                                                                                                                                                                                                                                                                                                                                                                                                                                                                                                                                                                                                                                                                                                                                                 |
| C100 | (2R,3R,4R,5S)-2-(hydroxymethyl)-1-(5-((3-methylbut-2-en-1-yl)oxy)pentyl)piperidine-3,4,5-triol                                                                    |  | <sup>1</sup> H NMR (600 MHz, CDCl <sub>3</sub> ) δ 5.28 - 5.21 (m, 1H), 5.10 - 5.01 (m, 1H), 3.93 - 3.87 (m, 2H), 3.56 - 3.40 (m, 3H), 3.30 - 3.16 (m, 2H), 3.05 (dd, <i>J</i> = 11.1, 4.3 Hz, 1H), 2.26 - 2.18 (m, 2H), 2.11 - 2.00 (m, 4H), 1.66 (s, 6H), 1.59 (s, 3H). <sup>13</sup> C NMR (150 MHz, CDCl <sub>3</sub> ) δ 142.4, 133.1, 125.0, 118.8, 80.3, 71.6, 70.4, 66.8, 59.0, 57.2, 51.4, 41.3, 27.7, 26.8, 18.8, 17.5. [α] <sub>D</sub> <sup>20</sup> = -14.72 (c = 0.98, CHCl <sub>3</sub> ). LC/MS analysis: <i>R</i> <sub>t</sub> 5.17 min (linear gradient 0-90% B), ES: = 300.3 [M+H] <sup>+</sup> , 599.4 [2M + H] <sup>+</sup> . HRMS: calcd for [C <sub>16</sub> H <sub>31</sub> NO <sub>5</sub> +H] <sup>+</sup> 300.2169, found 300.2169 [M+H] <sup>+</sup> . |
| C101 | (2S,3S,4S,5R,6S)-1-butyl-3,4,5-trihydroxy-6-(hydroxymethyl)-N-(2,4,4-trimethylpentan-2-yl)piperidine-2-carboxamide                                                |  | 6                                                                                                                                                                                                                                                                                                                                                                                                                                                                                                                                                                                                                                                                                                                                                                                  |
| C102 | (2S,3R,4R,5S)-2-(hydroxymethyl)-1-(5-((3-methylbut-2-en-1-yl)oxy)pentyl)piperidine-3,4,5-triol                                                                    |  | <sup>1</sup> H NMR (400 MHz, CDCl <sub>3</sub> ) δ 5.31 - 5.25 (m, 1H), 5.17 - 5.10 (m, 1H), 3.93 - 3.83 (m, 2H), 3.87 (dd, <i>J</i> = 5.1, 8.6, 1H), 3.60-3.52 (m, 1H), 3.45 (t, <i>J</i> = 7.1, 1H), 3.40-3.29 (m, 2H), 3.03 (dd, <i>J</i> = 5.2, 10.6, 1H), 2.83 (dd, <i>J</i> = 4.8, 12.4, 1H), 2.58 (dd, <i>J</i> = 9.3, 12.4, 1H), 2.19 - 2.03 (m, 4H), 1.71 (s, 6H), 1.63 (s, 3H). <sup>13</sup> C NMR (100 MHz, CDCl <sub>3</sub> ) δ 132.5, 125.2, 122.7, 75.8, 72.7, 71.2, 64.1, 57.9, 53.0, 52.3, 40.9, 40.1, 27.5, 25.9, 17.8, 16.5. [α] <sub>D</sub> <sup>20</sup> = +4.71 (c = 0.42, CHCl <sub>3</sub> ). LC/MS analysis: <i>R</i> <sub>t</sub> 5.48 min (linear                                                                                                     |

|      |                                                                                                                                 |                                                                                     |                                                                                                                                                                                                                                                                                                                                                                                                                                                                                                                                                                                                                                                                                           |
|------|---------------------------------------------------------------------------------------------------------------------------------|-------------------------------------------------------------------------------------|-------------------------------------------------------------------------------------------------------------------------------------------------------------------------------------------------------------------------------------------------------------------------------------------------------------------------------------------------------------------------------------------------------------------------------------------------------------------------------------------------------------------------------------------------------------------------------------------------------------------------------------------------------------------------------------------|
|      |                                                                                                                                 |                                                                                     | gradient 0-90% B), ES: = 300.3 [M+H] <sup>+</sup> , 599.8 [2M + H] <sup>+</sup> . HRMS: calcd for [C <sub>16</sub> H <sub>31</sub> NO <sub>5</sub> +H] <sup>+</sup> 300.2169, found 300.2169 [M+H] <sup>+</sup> .                                                                                                                                                                                                                                                                                                                                                                                                                                                                         |
| C103 | (2R,3R,4R,5S)-2-(hydroxymethyl)-1-nonylpiperidine-3,4,5-triol                                                                   | 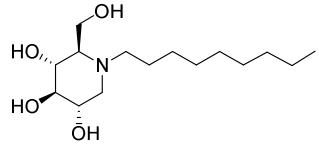   | 8                                                                                                                                                                                                                                                                                                                                                                                                                                                                                                                                                                                                                                                                                         |
| C104 | (2S,3R,4R,5S)-2-(hydroxymethyl)-1-nonylpiperidine-3,4,5-triol                                                                   |    | 8                                                                                                                                                                                                                                                                                                                                                                                                                                                                                                                                                                                                                                                                                         |
| C105 | (2R,3R,4S,5R)-1-(5-(((3R,5R,7R)-adamantan-1-yl)methoxy)pentyl)-2-(hydroxymethyl)piperidine-3,4,5-triol                          |    | <sup>1</sup> H NMR (400 MHz, D <sub>2</sub> O) δ 4.17 - 4.08 (m, 2H), 4.09 - 3.89 (m, 3H), 3.48 (d, <i>J</i> = 12.5 Hz, 1H) 3.42 (t, <i>J</i> = 6.2 Hz, 2H), 3.37 - 3.21 (m, 4H), 3.00 (s, 2H), 1.92 (s, 3H), 1.82 - 1.54 (m, 10H), 1.50 (s, 6H), 1.45 - 1.31 (m, 2H). <sup>13</sup> C NMR (100 MHz, D <sub>2</sub> O) δ 81.7, 71.4, 68.0, 66.1, 62.9, 61.3, 54.2, 53.0, 514, 39.3, 36.9, 33.74, 28.31, 28.14, 22.74, 21.81. [α] <sub>D</sub> <sup>20</sup> = +1.0 (c = 0.5, MeOH). IR/cm <sup>-1</sup> : 3368, 2901, 2847, 1674, 1458, 1204, 1134, 1092. HRMS: calcd for [C <sub>22</sub> H <sub>39</sub> NO <sub>5</sub> +H] <sup>+</sup> 398.2901, found 398.2896 [M+H] <sup>+</sup> . |
| C106 | (2R,3S,4S,5S)-N-(5-(((3R,5R,7R)-adamantan-1-yl)methoxy)pentyl)-1-butyl-3,4-dihydroxy-5-(hydroxymethyl)pyrrolidine-2-carboxamide |  | 7                                                                                                                                                                                                                                                                                                                                                                                                                                                                                                                                                                                                                                                                                         |
| C107 | (2S,3R,4S,5R)-1-(2-(2-butoxyethoxy)ethyl)-2-(hydroxymethyl)piperidine-3,4,5-triol                                               |  | <sup>1</sup> H NMR (400 MHz, MeOD) δ 4.04 - 3.78 (m, 7H), 3.69 - 3.58 (m, 6H), 3.53 - 3.58 (m, 5H), 1.64 - 1.49 (m, 2H), 1.46 - 1.32 (m, 2H), 0.94 (t, <i>J</i> = 7.4 Hz, 3H). <sup>13</sup> C NMR (100 MHz, MeOD) δ 72.4, 72.2, 71.4, 71.1, 69.2, 67.7, 66.1, 64.7, 60.8, 54.5, 32.8, 20.3, 14.3. [α] <sub>D</sub> <sup>20</sup> = 0.03 (c = 0.5, MeOD). IR/cm <sup>-1</sup> : 3398, 2958, 2495, 1670, 1458, 1203, 1138, 1087. LC/MS analysis: <i>R</i> <sub>t</sub> 3.07 min (linear gradient 10-90% B), ES: = 308.2 [M+H] <sup>+</sup> . HRMS: calcd for [C <sub>14</sub> H <sub>29</sub> O <sub>6</sub> N+H] <sup>+</sup> 308.2073 found 308.2074 [M+H] <sup>+</sup> .                |

|      |                                                                                                                                                                              |                                                                                     |                                                                                                                                                                                                                                                                                                                                                                                                                                                                                                                                                                                                                                                                                                                                                                                                                                                                                                            |
|------|------------------------------------------------------------------------------------------------------------------------------------------------------------------------------|-------------------------------------------------------------------------------------|------------------------------------------------------------------------------------------------------------------------------------------------------------------------------------------------------------------------------------------------------------------------------------------------------------------------------------------------------------------------------------------------------------------------------------------------------------------------------------------------------------------------------------------------------------------------------------------------------------------------------------------------------------------------------------------------------------------------------------------------------------------------------------------------------------------------------------------------------------------------------------------------------------|
| C108 | (2R,3S,4S,5S)-N,1-bis(5-(((3R,5R,7R)-adamantan-1-yl)methoxy)pentyl)-3,4-dihydroxy-5-(hydroxymethyl)pyrrolidine-2-carboxamide                                                 | 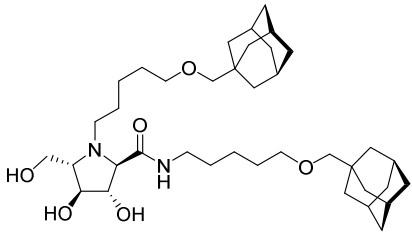   | 7                                                                                                                                                                                                                                                                                                                                                                                                                                                                                                                                                                                                                                                                                                                                                                                                                                                                                                          |
| C109 | (2S,3R,4R,5S)-2-(hydroxymethyl)-1-(5-(((2S,4s,4aR,6R,8R,8aS,10S,11R)-octahydro-2,8,4,6-(epibutane[1,2,3,4]tetra-yl)naphthalen-4(1H)-yl)methoxy)pentyl)piperidine-3,4,5-triol |    | <sup>1</sup> H NMR (400 MHz, MeOD) δ 4.04 - 3.83 (m, 5H), 3.55 - 3.29 (m, 9H), 2.09 - 2.03 (m, 2H), 1.89 - 1.55 (m, 19H), 1.49 - 1.42 (m, 4H). <sup>13</sup> C NMR (100 MHz, MeOD) δ 77.5, 72.0, 71.9, 68.8, 68.5, 63.5, 60.9, 54.5, 53.7, 42.2, 40.2, 39.8, 39.6, 39.3, 39.8, 39.0, 34.1, 31.1, 30.2, 28.8, 27.3, 24.7, 24.1. [α] <sub>D</sub> <sup>20</sup> = 0.04 (c = 0.7, MeOD). IR/cm <sup>-1</sup> : 3363, 2900, 2866, 1674, 1435, 1203, 1134, 1072. LC/MS analysis: R <sub>t</sub> 6.50 min (linear gradient 10-90% B), ES: = 450.4 [M+H] <sup>+</sup> . HRMS: calcd for [C <sub>26</sub> H <sub>43</sub> O <sub>5</sub> N+H] <sup>+</sup> 450.3219 found 450.3214 [M+H] <sup>+</sup> .                                                                                                                                                                                                            |
| C110 | (2S,3S,4S,5S)-1-butyl-3,4-dihydroxy-5-(hydroxymethyl)pyrrolidine-2-carboxamide                                                                                               |   | 7                                                                                                                                                                                                                                                                                                                                                                                                                                                                                                                                                                                                                                                                                                                                                                                                                                                                                                          |
| C111 | (2R,3R,4R,5S)-2-(hydroxymethyl)-1-(5-(((2R,4s,4aR,6S,8S,8aS,10S,11R)-octahydro-2,8,4,6-(epibutane[1,2,3,4]tetra-yl)naphthalen-4(1H)-yl)methoxy)pentyl)piperidine-3,4,5-triol |  | <sup>1</sup> H NMR (400 MHz, MeOD) δ 4.10 (d, J = 12.4 Hz, 1H), 3.90 (dd, J = 12.6, 2.8 Hz, 1H), 3.69 (qd, J = 9.6, 4.9 Hz, 1H), 3.60 (t, J = 9.7, 1H), 3.49 - 3.42 (m, 3H), 3.39 - 3.34 (m, 4H), 3.20 (td, J = 12.7, 5.2 Hz, 1H), 3.03 (d, J = 9.6 Hz, 1H), 2.97 (t, J = 11.7 Hz, 1H), 2.10 - 2.04 (m, 2H), 1.88 - 1.57 (m, 19H), 1.53 - 1.41 (m, 4H). <sup>13</sup> C NMR (100 MHz, MeOD) δ 78.1, 77.6, 72.0, 68.8, 67.8, 67.3, 54.9, 54.2, 42.2, 40.1, 39.8, 39.6, 39.2, 39.1, 39.0, 34.0, 31.1, 30.2, 28.8, 27.3, 24.6, 24.0. [α] <sub>D</sub> <sup>20</sup> = - 0.01 (c = 1.1, MeOD). IR/cm <sup>-1</sup> : 3340, 2900, 2866, 1670, 1438, 1203, 1184, 1134, 1033. LC/MS analysis: R <sub>t</sub> 6.34 min (linear gradient 10-90% B), ES: = 450.4 [M+H] <sup>+</sup> . HRMS: calcd for [C <sub>26</sub> H <sub>43</sub> O <sub>5</sub> N+H] <sup>+</sup> 450.3219 found 450.3216 [M+H] <sup>+</sup> . |

|      |                                                                                                                                  |  |    |
|------|----------------------------------------------------------------------------------------------------------------------------------|--|----|
| C112 | (2S,3S,4S,5S)-1-(5-(((3S,5S,7S)-adamantan-1-yl)methoxy)pentyl)-3,4-dihydroxy-5-(hydroxymethyl)pyrrolidine-2-carboxamide          |  | 7  |
| C113 | (2R,3R,4R,5S)-1-(5-(((3R,5R,7R)-adamantan-1-yl)methoxy)pentyl)-2-(hydroxymethyl)piperidine-3,4,5-triol                           |  | 13 |
| C114 | (2S,3S,4S,5S)-3,4-dihydroxy-5-(hydroxymethyl)-N-pentylpyrrolidine-2-carboxamide                                                  |  | 7  |
| C115 | (2R,3S)-1-(5-(((3R,5R,7R)-adamantan-1-yl)methoxy)pentyl)-2-(hydroxymethyl)piperidine-3-ol                                        |  | 9  |
| C116 | (2S,3S,4S,5S)-1-butyl-3,4-dihydroxy-5-(hydroxymethyl)-N-pentylpyrrolidine-2-carboxamide                                          |  | 7  |
| C117 | (2S,3S,4S,5S)-1-(5-(((3S,5S,7S)-adamantan-1-yl)methoxy)pentyl)-3,4-dihydroxy-5-(hydroxymethyl)-N-pentylpyrrolidine-2-carboxamide |  | 7  |
| C118 | (2R,3R,4R,5S)-2-(hydroxymethyl)-1-(5-(3-(trifluoromethyl)-[1,1'-biphenyl]-4-yl)methoxy)pentyl)piperidine-3,4,5-triol             |  | 10 |
| C119 | (2S,3S,4S,5S)-3,4-dihydroxy-5-(hydroxymethyl)-N-(2,4,4-trimethylpentan-2-yl)pyrrolidine-2-carboxamide                            |  | 7  |
| C120 | (2R,3R,4R,5S)-2-(hydroxymethyl)-1-(5-(2-(trifluoromethyl)-[1,1'-biphenyl]-4-yl)methoxy)pentyl)piperidine-3,4,5-triol             |  | 10 |
| C121 | (2S,3S,4S,5S)-1-butyl-3,4-dihydroxy-5-(hydroxymethyl)-N-(2,4,4-trimethylpentan-2-yl)pyrrolidine-2-carboxamide                    |  | 7  |

|      |                                                                                                                                                        |  |                                                                                                                                                                                                                                                                                                                                                                                                                                                                                                                                                                                                                                                                                                                         |
|------|--------------------------------------------------------------------------------------------------------------------------------------------------------|--|-------------------------------------------------------------------------------------------------------------------------------------------------------------------------------------------------------------------------------------------------------------------------------------------------------------------------------------------------------------------------------------------------------------------------------------------------------------------------------------------------------------------------------------------------------------------------------------------------------------------------------------------------------------------------------------------------------------------------|
| C122 | (2R,3S,4S,5R)-1-(5-([1,1'-biphenyl]-4-ylmethoxy)pentyl)-2-(hydroxymethyl)piperidine-3,4,5-triol                                                        |  | 10                                                                                                                                                                                                                                                                                                                                                                                                                                                                                                                                                                                                                                                                                                                      |
| C123 | (2S,3S,4S,5S)-1-(5-(((3S,5S,7S)-adamantan-1-yl)methoxy)pentyl)-3,4-dihydroxy-5-(hydroxymethyl)-N-(2,4,4-trimethylpentan-2-yl)pyrrolidine-2-carboxamide |  | 7                                                                                                                                                                                                                                                                                                                                                                                                                                                                                                                                                                                                                                                                                                                       |
| C124 | (2R,3S,4S,5R)-1-(5-(((3R,5R,7R)-adamantan-1-yl)methoxy)pentyl)-2-(hydroxymethyl)piperidine-3,4,5-triol                                                 |  | <sup>1</sup> H NMR (400 MHz, CDCl <sub>3</sub> ) δ 4.03 - 3.87 (br m, 4H), 3.84 (br s, 1H), 3.53 - 3.33 (m, 7H), 2.98 (s, 2H), 1.94 (b s, 3H), 1.77 - 1.62 (m, 8H), 1.55 (m, 6H), 1.49 - 1.44 (m, 4H). <sup>13</sup> C NMR (100 MHz, CDCl <sub>3</sub> ) δ 83.1, 71.7, 71.7, 68.5, 68.0, 63.8, 60.5, 54.4, 53.7, 40.8, 38.3, 35.1, 31.1, 30.1, 24.6, 23.3. [α] <sub>D</sub> <sup>20</sup> = -0.07 (c = 0.9, MeOD). IR/cm <sup>-1</sup> : 3363, 2904, 2846, 1670, 1199, 1134, 1072. LC/MS analysis: R <sub>t</sub> 5.77 min (linear gradient 10-90% B), ES: = 398.3 [M+H] <sup>+</sup> . HRMS: calcd for [C <sub>22</sub> H <sub>39</sub> O <sub>5</sub> N+H] <sup>+</sup> 398.2906, found 398.2902 [M+H] <sup>+</sup> . |
| C125 | (2S,3R,4R,5S)-1-(5-(((1S,3S,5S,7S)-adamantan-2-yl)methoxy)pentyl)-2-(hydroxymethyl)piperidine-3,4,5-triol                                              |  | 10                                                                                                                                                                                                                                                                                                                                                                                                                                                                                                                                                                                                                                                                                                                      |
| C126 | (2S,3S,4R,5R,6R)-1-(5-(((3R,5R,7R)-adamantan-1-yl)methoxy)pentyl)-2-butyl-6-(hydroxymethyl)piperidine-3,4,5-triol                                      |  | 11                                                                                                                                                                                                                                                                                                                                                                                                                                                                                                                                                                                                                                                                                                                      |
| C127 | (2R,3R,4R,5S)-1-(5-(cyclohexylmethoxy)pentyl)-2-(hydroxymethyl)piperidine-3,4,5-triol                                                                  |  | 10                                                                                                                                                                                                                                                                                                                                                                                                                                                                                                                                                                                                                                                                                                                      |
| C128 | (2S,3S,4R,5R,6R)-2-(5-(((3S,5S,7S)-adamantan-1-yl)methoxy)pentyl)-1-benzyl-6-(hydroxymethyl)piperidine-3,4,5-triol                                     |  | 11                                                                                                                                                                                                                                                                                                                                                                                                                                                                                                                                                                                                                                                                                                                      |
| C129 | (2S,3R,4R,5S)-1-(5-(cyclohexylmethoxy)pentyl)-2-(hydroxymethyl)piperidine-3,4,5-triol                                                                  |  | 10                                                                                                                                                                                                                                                                                                                                                                                                                                                                                                                                                                                                                                                                                                                      |

|      |                                                                                                                   |  |    |
|------|-------------------------------------------------------------------------------------------------------------------|--|----|
| C130 | (2S,3S,4R,5R,6R)-2-(4-(((3S,5S,7S)-adamantan-1-yl)methoxy)butyl)-6-(hydroxymethyl)piperidine-3,4,5-triol          |  | 11 |
| C131 | (2R,3R,4R,5S)-1-((Z)-6-((3R,5R,7R)-adamantan-1-yl)hex-5-en-1-yl)-2-(hydroxymethyl)piperidine-3,4,5-triol          |  | 10 |
| C132 | (2S,3S,4R,5R,6R)-2-(4-(((3S,5S,7S)-adamantan-1-yl)methoxy)butyl)-6-(hydroxymethyl)-1-methylpiperidine-3,4,5-triol |  | 11 |
| C133 | (2S,3R,4R,5S)-1-((Z)-6-((3S,5S,7S)-adamantan-1-yl)hex-5-en-1-yl)-2-(hydroxymethyl)piperidine-3,4,5-triol          |  | 10 |
| C134 | (2S,3S,4R,5R,6R)-2-(4-(((3S,5S,7S)-adamantan-1-yl)methoxy)butyl)-1-butyl-6-(hydroxymethyl)piperidine-3,4,5-triol  |  | 11 |
| C135 | (2S,3S)-1-(4-(((3S,5S,7S)-adamantan-1-yl)methoxy)butyl)-2-(hydroxymethyl)-1,2,3,6-tetrahydropyridin-3-ol          |  | 9  |
| C136 | (2S,3R,4R,5S,6R)-2-(4-(((3S,5S,7S)-adamantan-1-yl)methoxy)butyl)-6-(hydroxymethyl)tetrahydro-2H-pyran-3,4,5-triol |  | 11 |
| C137 | (2S,3R)-2-(hydroxymethyl)piperidin-3-ol                                                                           |  | 9  |
| C138 | (2S,3S,4R,5R,6R)-2-(6-(((3S,5S,7S)-adamantan-1-yl)methoxy)hexyl)-6-(hydroxymethyl)piperidine-3,4,5-triol          |  | 11 |
| C139 | (2R,3R,4R,5S)-1-(5-(benzyloxy)pentyl)-2-(hydroxymethyl)piperidine-3,4,5-triol                                     |  | 10 |



|      |                                                                                                                                                         |                                                                                     |    |
|------|---------------------------------------------------------------------------------------------------------------------------------------------------------|-------------------------------------------------------------------------------------|----|
| C140 | (2S,3S,4R,5R,6R)-2-(6-(((3S,5S,7S)-adamantan-1-yl)methoxy)hexyl)-6-(hydroxymethyl)-1-methylpiperidine-3,4,5-triol                                       | 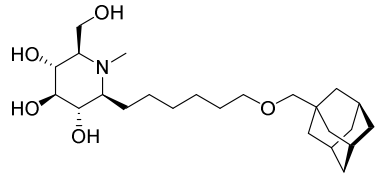   | 11 |
| C141 | (2R,3R,4R,5S)-1-(6-(((3R,5R,7R)-adamantan-1-yl)methoxy)hexyl)-2-(hydroxymethyl)piperidine-3,4,5-triol                                                   |    | 10 |
| C142 | (2S,3S,4R,5R,6R)-2-(6-(((3S,5S,7S)-adamantan-1-yl)methoxy)hexyl)-1-(tert-butyl)-6-(hydroxymethyl)piperidine-3,4,5-triol                                 |    | 11 |
| C143 | (2R,3R,4R,5S)-2-(hydroxymethyl)piperidine-3,4,5-triol                                                                                                   |    | 3  |
| C144 | (2S,3R,4R,5S,6R)-2-(6-(((3S,5S,7S)-adamantan-1-yl)methoxy)hexyl)-6-(hydroxymethyl)tetrahydro-2H-pyran-3,4,5-triol                                       |   | 11 |
| C145 | (2S,3S,4S,5S)-N-(5-(((3S,5S,7S)-adamantan-1-yl)methoxy)pentyl)-1-butyl-3,4-dihydroxy-5-(hydroxymethyl)pyrrolidine-2-carboxamide                         |  | 7  |
| C146 | (2S,3S,4S,5S)-N,1-bis(5-(((3S,5S,7S)-adamantan-1-yl)methoxy)pentyl)-3,4-dihydroxy-5-(hydroxymethyl)pyrrolidine-2-carboxamide                            |  | 7  |
| C147 | (2R,3R,4R,5S,6R)-1-butyl-2-(hydroxymethyl)-6-(((2,4,4-trimethylpentan-2-yl)amino)methyl)piperidine-3,4,5-triol                                          |  | 11 |
| C148 | (2R,3R,4R,5S,6R)-1-(5-(((3R,5R,7R)-adamantan-1-yl)methoxy)pentyl)-2-(hydroxymethyl)-6-(((2,4,4-trimethylpentan-2-yl)amino)methyl)piperidine-3,4,5-triol |  | 11 |

|      |                                                                                                                   |                                                                                     |    |
|------|-------------------------------------------------------------------------------------------------------------------|-------------------------------------------------------------------------------------|----|
| C149 | (2S,3S,4R,5S)-2-(hydroxymethyl)piperidine-3,4,5-triol                                                             | 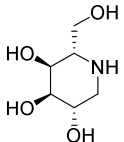   | 3  |
| C150 | (2R,3S,4R,5S)-1-(5-(((3R,5R,7R)-adamantan-1-yl)methoxy)pentyl)-2-(hydroxymethyl)piperidine-3,4,5-triol            |    | 3  |
| C151 | (2S,3S,4R,5S)-1-butyl-2-(hydroxymethyl)piperidine-3,4,5-triol                                                     |    | 3  |
| C152 | (2S,3S,4R,5S)-1-(5-(((3S,5S,7S)-adamantan-1-yl)methoxy)pentyl)-2-(hydroxymethyl)piperidine-3,4,5-triol            |    | 3  |
| C153 | (2R,3S,4R,5S)-1-butyl-2-(hydroxymethyl)piperidine-3,4,5-triol                                                     |    | 3  |
| C154 | (2R,3S,4R,5S)-2-(hydroxymethyl)piperidine-3,4,5-triol                                                             |   | 3  |
| C155 | (2S,3S)-1-(5-(((3S,5S,7S)-adamantan-1-yl)methoxy)pentyl)-2-(hydroxymethyl)piperidine-3-ol                         |  | 9  |
| C156 | (2S,3S,4R,5R,6R)-2-(5-(((3S,5S,7S)-adamantan-1-yl)methoxy)pentyl)-1-hexyl-6-(hydroxymethyl)piperidine-3,4,5-triol |  | 11 |
| C157 | (2S,3S)-1-butyl-2-(hydroxymethyl)-1,2,3,4-tetrahydropyridin-3-ol                                                  |  | 9  |
| C158 | (2R,3S,4R,5R,6R)-2-(6-(((3R,5R,7R)-adamantan-1-yl)methoxy)hexyl)-6-(hydroxymethyl)piperidine-3,4,5-triol          |  | 11 |

|      |                                                                                                                       |  |    |
|------|-----------------------------------------------------------------------------------------------------------------------|--|----|
| C159 | (2R,3S,4R,5R,6R)-2-((E)-5-(((3R,5R,7R)-adamantan-1-yl)methoxy)pent-2-en-1-yl)-6-(hydroxymethyl)piperidine-3,4,5-triol |  | 11 |
| C160 | (2S,3S)-1-butyl-2-(hydroxymethyl)piperidine-3-ol                                                                      |  | 9  |
| C161 | (2R,3S,4R,5R,6S)-2-(4-(((3R,5R,7R)-adamantan-1-yl)methoxy)butyl)-6-(hydroxymethyl)piperidine-3,4,5-triol              |  | 11 |
| C162 | (2S,3R,4R)-2-(hydroxymethyl)piperidine-3,4-diol                                                                       |  | 9  |
| C163 | (2R,3S,4R,5R,6S)-2-(5-(((3R,5R,7R)-adamantan-1-yl)methoxy)pentyl)-6-(hydroxymethyl)piperidine-3,4,5-triol             |  | 11 |
| C164 | (2S,3R,4R)-1-butyl-2-(hydroxymethyl)piperidine-3,4-diol                                                               |  | 9  |
| C165 | (2R,3S,4R,5R,6S)-2-(6-(((3R,5R,7R)-adamantan-1-yl)methoxy)hexyl)-6-(hydroxymethyl)piperidine-3,4,5-triol              |  | 11 |
| C166 | (2S,3R,4R)-1-(5-(((3S,5S,7S)-adamantan-1-yl)methoxy)pentyl)-2-(hydroxymethyl)piperidine-3,4-diol                      |  | 9  |
| C167 | (2R,3S,4R,5R,6S)-2-((E)-5-(((3R,5R,7R)-adamantan-1-yl)methoxy)pent-2-en-1-yl)-6-(hydroxymethyl)piperidine-3,4,5-triol |  | 11 |
| C168 | (2S,3R)-2-(hydroxymethyl)-1,2,3,4-tetrahydropyridin-3-ol                                                              |  | 9  |

|      |                                                                                                                                                        |  |                                                                                                                                                                                                                                                                                                                                                                                                                                                                                                                                                                                                                                                                                                                                                                                                                                                                                                                              |
|------|--------------------------------------------------------------------------------------------------------------------------------------------------------|--|------------------------------------------------------------------------------------------------------------------------------------------------------------------------------------------------------------------------------------------------------------------------------------------------------------------------------------------------------------------------------------------------------------------------------------------------------------------------------------------------------------------------------------------------------------------------------------------------------------------------------------------------------------------------------------------------------------------------------------------------------------------------------------------------------------------------------------------------------------------------------------------------------------------------------|
| C169 | (2R,3S,4S,5R)-2-(4-(((3R,5R,7R)-adamantan-1-yl)methoxy)butyl)piperidine-3,4,5-triol                                                                    |  | 11                                                                                                                                                                                                                                                                                                                                                                                                                                                                                                                                                                                                                                                                                                                                                                                                                                                                                                                           |
| C170 | (2R,3R,4R,5S)-1-(5-(2-((3R,5R,7R)-adamantan-1-yl)ethoxy)pentyl)-2-(hydroxymethyl)piperidine-3,4,5-triol                                                |  | <sup>1</sup> H NMR (600 MHz, MeOD) δ 3.89 - 3.82 (m, 2H), 3.51 - 3.44 (m, 3H), 3.42 (t, <i>J</i> = 6.5 Hz, 2H), 3.36 (t, <i>J</i> = 9.3 Hz, 1H), 3.14 (t, <i>J</i> = 9.1 Hz, 1H), 3.01 (dd, <i>J</i> = 11.1, 4.7 Hz, 1H), 2.86 - 2.79 (m, 1H), 2.66 - 2.56 (m, 1H), 2.21 (t, <i>J</i> = 10.7 Hz, 1H), 2.15 (d, <i>J</i> = 7.4 Hz, 1H), 1.93 (s, 3H), 1.77 - 1.65 (m, 6H), 1.62 - 1.48 (m, 8H), 1.35 (m, 4H). <sup>13</sup> C NMR (150 MHz, MeOD) δ 80.4, 71.8, 71.7, 70.6, 67.8, 67.4, 59.4, 59.2, 53.7, 44.8, 48.3, 38.2 (CH <sub>2</sub> ), 32.8, 30.6, 30.2, 25.2, 24.9. [α] <sub>D</sub> <sup>20</sup> = 11.2 (c = 0.8, MeOD). IR/cm <sup>-1</sup> : 3360, 2360, 2341, 1097, 1089, 1033, 1012. LC/MS analysis: <i>R</i> <sub>t</sub> 5.77 min (linear gradient 10-90% B), ES: = 412.1 [M+H] <sup>+</sup> . HRMS: calcd for [C <sub>22</sub> H <sub>40</sub> NO <sub>5</sub> +H] <sup>+</sup> : 412.3057. found: 412.3057 |
| C171 | (2R,3S,4S,5R)-2-(5-(((3R,5R,7R)-adamantan-1-yl)methoxy)pentyl)piperidine-3,4,5-triol                                                                   |  | 11                                                                                                                                                                                                                                                                                                                                                                                                                                                                                                                                                                                                                                                                                                                                                                                                                                                                                                                           |
| C172 | (2R,3S,4S,5R)-2-(5-(((3R,5R,7R)-adamantan-1-yl)methoxy)pentyl)piperidine-3,4,5-triol                                                                   |  | 11                                                                                                                                                                                                                                                                                                                                                                                                                                                                                                                                                                                                                                                                                                                                                                                                                                                                                                                           |
| C173 | 1-((2S,3S,4S,5R,6S)-1-butyl-3,4,5-trihydroxy-6-(hydroxymethyl)piperidin-2-yl)-3,3,5,5-tetramethylhexan-1-one                                           |  | 6                                                                                                                                                                                                                                                                                                                                                                                                                                                                                                                                                                                                                                                                                                                                                                                                                                                                                                                            |
| C174 | (2S,3R,4R,5S)-1-(5-(((3S,5S,7S)-adamantan-1-yl)methoxy)pentyl)-2-(hydroxymethyl)piperidine-3,4,5-triol                                                 |  | 3                                                                                                                                                                                                                                                                                                                                                                                                                                                                                                                                                                                                                                                                                                                                                                                                                                                                                                                            |
| C175 | (2S,3R,4S,5R)-1-(5-(((3S,5S,7S)-adamantan-1-yl)methoxy)pentyl)-3,4-dihydroxy-5-(hydroxymethyl)-N-(2,4,4-trimethylpentan-2-yl)pyrrolidine-2-carboxamide |  | 7                                                                                                                                                                                                                                                                                                                                                                                                                                                                                                                                                                                                                                                                                                                                                                                                                                                                                                                            |

|      |                                                                                                                                                        |  |    |
|------|--------------------------------------------------------------------------------------------------------------------------------------------------------|--|----|
| C176 | (2S,3R,4S,5R)-N-(5-(((3S,5S,7S)-adamantan-1-yl)methoxy)pentyl)-3,4-dihydroxy-5-(hydroxymethyl)pyrrolidine-2-carboxamide                                |  | 7  |
| C177 | (2R,3R,4S,5R)-1-(5-(((3R,5R,7R)-adamantan-1-yl)methoxy)pentyl)-3,4-dihydroxy-5-(hydroxymethyl)-N-(2,4,4-trimethylpentan-2-yl)pyrrolidine-2-carboxamide |  | 7  |
| C178 | (2R,3R,4S,5R)-N-(5-(((3R,5R,7R)-adamantan-1-yl)methoxy)pentyl)-3,4-dihydroxy-5-(hydroxymethyl)pyrrolidine-2-carboxamide                                |  | 7  |
| C179 | (2R,3S,4S,5S)-N-(5-(((3R,5R,7R)-adamantan-1-yl)methoxy)pentyl)-3,4-dihydroxy-5-(hydroxymethyl)pyrrolidine-2-carboxamide                                |  | 7  |
| C180 | (2S,3S,4S,5R,6R)-1-(5-(((3S,5S,7S)-adamantan-1-yl)methoxy)pentyl)-3,4,5-trihydroxy-6-(hydroxymethyl)-N-pentylpiperidine-2-carboxamide                  |  | 6  |
| C181 | (2S,3S,4S,5R,6R)-3,4,5-trihydroxy-6-(hydroxymethyl)-1-methyl-N-(2,2,4,4-tetramethylpentyl)piperidine-2-carboxamide                                     |  | 6  |
| C182 | (2S,3R,4R,5S)-1-butyl-2-(hydroxymethyl)piperidine-3,4,5-triol                                                                                          |  | 3  |
| C183 | (2R,3S,4R,5R,6S)-2-(4-(((3R,5R,7R)-adamantan-1-yl)methoxy)butyl)-6-(hydroxymethyl)piperidine-3,4,5-triol                                               |  | 11 |
| C184 | (2R,3S,4R,5R,6S)-2-(5-(((3R,5R,7R)-adamantan-1-yl)methoxy)pentyl)-6-(hydroxymethyl)piperidine-3,4,5-triol                                              |  | 11 |

|      |                                                                                                                                                                        |  |                                                                                                                                                                                                                                                                                                                                                                                                                                                                                                                                                                                                                                              |
|------|------------------------------------------------------------------------------------------------------------------------------------------------------------------------|--|----------------------------------------------------------------------------------------------------------------------------------------------------------------------------------------------------------------------------------------------------------------------------------------------------------------------------------------------------------------------------------------------------------------------------------------------------------------------------------------------------------------------------------------------------------------------------------------------------------------------------------------------|
| C185 | (2S,3S,4R,5R,6R)-2-((Z)-5-(((3S,5S,7S)-adamantan-1-yl)methoxy)pent-1-en-1-yl)-1-(5-(((3R,5R,7R)-adamantan-1-yl)methoxy)pentyl)-6-(hydroxymethyl)piperidine-3,4,5-triol |  | 11                                                                                                                                                                                                                                                                                                                                                                                                                                                                                                                                                                                                                                           |
| C186 | (2S,3S,4R,5R,6R)-1-(5-(((3R,5R,7R)-adamantan-1-yl)methoxy)pentyl)-2-(5-(((3S,5S,7S)-adamantan-1-yl)methoxy)pentyl)-6-(hydroxymethyl)piperidine-3,4,5-triol             |  | 11                                                                                                                                                                                                                                                                                                                                                                                                                                                                                                                                                                                                                                           |
| C187 | (2S,3S,4R,5R,6R)-2-(5-(((3S,5S,7S)-adamantan-1-yl)methoxy)pent-1-yn-1-yl)-6-(hydroxymethyl)piperidine-3,4,5-triol                                                      |  | 11                                                                                                                                                                                                                                                                                                                                                                                                                                                                                                                                                                                                                                           |
| C188 | (2R,3R,4S,5R)-1-butyl-2-(hydroxymethyl)piperidine-3,4,5-triol                                                                                                          |  | <sup>1</sup> H NMR (400 MHz, D <sub>2</sub> O) δ 4.13 - 4.04 (m, 2H), 4.02 - 3.88 (m, 3H), 3.44 (d, <i>J</i> = 13.1 Hz, 1H), 3.32 - 3.14 (m, 4H), 1.73 - 1.54 (m, 2H), 1.32 (h, <i>J</i> = 7.1 Hz, 2H), 0.87 (t, <i>J</i> = 7.4 Hz, 3H). <sup>13</sup> C NMR (100 MHz, D <sub>2</sub> O) δ 68.1, 66.0, 62.9, 61.2, 54.1, 53.0, 51.3, 23.8, 19.3, 12.7. [α] <sub>D</sub> <sup>20</sup> = -0.5 (c = 0.4, MeOH). IR/cm <sup>-1</sup> : 3333, 2955, 1674, 1200, 1134, 1072. HRMS: calcd for [C <sub>10</sub> H <sub>21</sub> NO <sub>4</sub> +H] <sup>+</sup> 220.15433, found 220.15434 [M+H] <sup>+</sup> .                                    |
| C189 | (2S,3S,4R,5R,6R)-2-((E)-5-(((3S,5S,7S)-adamantan-1-yl)methoxy)pent-1-en-1-yl)-6-(hydroxymethyl)piperidine-3,4,5-triol                                                  |  | 11                                                                                                                                                                                                                                                                                                                                                                                                                                                                                                                                                                                                                                           |
| C190 | (2R,3R,4S,5R)-2-(hydroxymethyl)-1-nonylpiperidine-3,4,5-triol                                                                                                          |  | <sup>1</sup> H NMR (400 MHz, D <sub>2</sub> O) δ 4.22 - 4.12 (m, 2H), 4.11 - 3.98 (m, 3H), 3.54 (d, <i>J</i> = 12.1 Hz, 1H), 3.46 - 3.21 (m, 4H), 1.95 - 1.63 (m, 2H), 1.52 - 1.15 (m, 12H), 0.97 - 0.76 (t, <i>J</i> = 7.2 Hz, 3H). <sup>13</sup> C NMR (100 MHz, D <sub>2</sub> O) δ 68.2, 66.1, 63.0, 61.2, 54.2, 53.3, 51.4, 31.2, 28.4, 28.4, 28.2, 25.8, 22.1, 21.8, 13.4. [α] <sub>D</sub> <sup>20</sup> = 0.0 (c = 1.0, MeOH). IR/cm <sup>-1</sup> : 3225, 2928, 2859, 1670, 1435, 1184, 1134, 1072. HRMS: calcd for [C <sub>15</sub> H <sub>29</sub> NO <sub>4</sub> +H] <sup>+</sup> 290.2326, found 290.2326 [M+H] <sup>+</sup> . |

|      |                                                                                                                            |  |                                                                                                                                                                                                                                                                                                                                                                                                                                                                                                                                                                                                                                                                   |
|------|----------------------------------------------------------------------------------------------------------------------------|--|-------------------------------------------------------------------------------------------------------------------------------------------------------------------------------------------------------------------------------------------------------------------------------------------------------------------------------------------------------------------------------------------------------------------------------------------------------------------------------------------------------------------------------------------------------------------------------------------------------------------------------------------------------------------|
| C191 | (2S,3S,4R,5R,6R)-2-((Z)-5-(((3S,5S,7S)-adamantan-1-yl)methoxy)pent-1-en-1-yl)-6-(hydroxymethyl)piperidine-3,4,5-triol      |  | 11                                                                                                                                                                                                                                                                                                                                                                                                                                                                                                                                                                                                                                                                |
| C192 | (2R,3R,4S,5S)-1-butyl-2-(hydroxymethyl)piperidine-3,4,5-triol                                                              |  | <sup>1</sup> H NMR (400 MHz, D <sub>2</sub> O) δ 4.20 (s, 1H), 4.14 - 3.96 (m, 3H), 3.90 (dd, <i>J</i> = 10.7, 2.4 Hz, 1H), 3.45 - 3.18 (m, 5H), 1.90 - 1.62 (m, 2H), 1.41 (m, 2H), 0.95 (t, <i>J</i> = 7.4 Hz, 3H). <sup>13</sup> C NMR (100 MHz, D <sub>2</sub> O) δ 69.5, 64.8, 63.9, 60.2, 53.4, 53.2, 48.8, 24.4, 19.3, 12.8. [ $\alpha$ ] <sub>D</sub> <sup>20</sup> = -3.2 (c = 0.5, MeOH). IR/cm <sup>-1</sup> : 3372, 1670, 1458, 1423, 1184, 1134, 1076, 1043. LCMS: 00-20, RT 1.47 min, [M+H] <sup>+</sup> = 220.1. HRMS: calcd for [C <sub>10</sub> H <sub>21</sub> NO <sub>4</sub> +H] <sup>+</sup> 220.1543, found 220.1544 [M+H] <sup>+</sup> .    |
| C193 | (2S,3S,4R,5R,6R)-2-(5-(((3S,5S,7S)-adamantan-1-yl)methoxy)pentyl)-6-(hydroxymethyl)piperidine-3,4,5-triol                  |  | 11                                                                                                                                                                                                                                                                                                                                                                                                                                                                                                                                                                                                                                                                |
| C194 | (2R,3R,4S,5S)-2-(hydroxymethyl)-1-nonylpiperidine-3,4,5-triol                                                              |  | <sup>1</sup> H NMR (400 MHz, D <sub>2</sub> O) δ 4.20 (s, 1H), 4.15 - 3.84 (m, 4H), 3.43 - 3.17 (m, 5H), 1.75 (s, 2H), 1.46 - 1.20 (m, 12H), 0.88 (t, <i>J</i> = 6.6 Hz, 3H). <sup>13</sup> C NMR (100 MHz, D <sub>2</sub> O) δ 69.6, 64.8, 63.9, 60.2, 53.6, 53.2, 48.9, 31.6, 29.2, 28.9, 28.8, 26.2, 22.2, 13.7. [ $\alpha$ ] <sub>D</sub> <sup>20</sup> = -5.0 (c = 1.0, MeOH). IR/cm <sup>-1</sup> : 3352, 2955, 2926, 2857, 1670, 1456, 1200, 1184, 1134, 1076, 1043. LCMS: 10-50, RT 6.67 min, [M+H] <sup>+</sup> = 290.3. HRMS: calcd for [C <sub>15</sub> H <sub>31</sub> NO <sub>4</sub> +H] <sup>+</sup> 290.2332, found 290.2326 [M+H] <sup>+</sup> . |
| C195 | (2S,3S,4R,5R,6R)-2-butyl-6-(hydroxymethyl)piperidine-3,4,5-triol                                                           |  | 11                                                                                                                                                                                                                                                                                                                                                                                                                                                                                                                                                                                                                                                                |
| C196 | (2R,3S,4S)-1-(5-(((3R,5R,7R)-adamantan-1-yl)methoxy)pentyl)-2-(hydroxymethyl)piperidine-3,4-diol                           |  | 9                                                                                                                                                                                                                                                                                                                                                                                                                                                                                                                                                                                                                                                                 |
| C197 | (2R,2'R,3R,3'R,4R,4'R,5S,5'S)-1,1'-(((2-(((3R,5R,7R)-adamantan-1-yl)propane-1,3-diyl)bis(oxy))bis(pentane-5,1-diyl))bis(2- |  | 12                                                                                                                                                                                                                                                                                                                                                                                                                                                                                                                                                                                                                                                                |

|      |                                                                                                                         |                                                                                     |                                                                                                                                                                                                                                                                                                                                                                                                                                                                                                                                                                                                                                                                                                                                                                                                                                                                                                                                                                                                                                                               |
|------|-------------------------------------------------------------------------------------------------------------------------|-------------------------------------------------------------------------------------|---------------------------------------------------------------------------------------------------------------------------------------------------------------------------------------------------------------------------------------------------------------------------------------------------------------------------------------------------------------------------------------------------------------------------------------------------------------------------------------------------------------------------------------------------------------------------------------------------------------------------------------------------------------------------------------------------------------------------------------------------------------------------------------------------------------------------------------------------------------------------------------------------------------------------------------------------------------------------------------------------------------------------------------------------------------|
|      | (hydroxymethyl)piperidine-3,4,5-triol                                                                                   |                                                                                     |                                                                                                                                                                                                                                                                                                                                                                                                                                                                                                                                                                                                                                                                                                                                                                                                                                                                                                                                                                                                                                                               |
| C198 | (2S,3S,4S,5S)-N-(5-(((3S,5S,7S)-adamantan-1-yl)methoxy)pentyl)-3,4-dihydroxy-5-(hydroxymethyl)pyrrolidine-2-carboxamide | 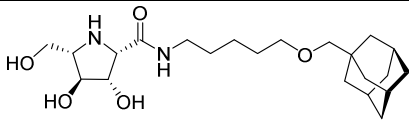   | 7                                                                                                                                                                                                                                                                                                                                                                                                                                                                                                                                                                                                                                                                                                                                                                                                                                                                                                                                                                                                                                                             |
| C199 | (2S,3R)-1-butyl-2-(hydroxymethyl)-1,2,3,6-tetrahydropyridin-3-ol                                                        |    | 9                                                                                                                                                                                                                                                                                                                                                                                                                                                                                                                                                                                                                                                                                                                                                                                                                                                                                                                                                                                                                                                             |
| C200 | (2R,3R,4R,5S)-1-(2-(2-butoxyethoxy)ethyl)-2-(hydroxymethyl)piperidine-3,4,5-triol                                       |    | <sup>1</sup> H NMR (400 MHz, MeOD) δ 4.04 (dd, <i>J</i> = 12.5, 2.0 Hz, 1H), 3.98 (dd, <i>J</i> = 12.5, 2.9 Hz, 1H), 3.83 (t, <i>J</i> = 5.0 Hz, 2H), 3.69 (ddd, <i>J</i> = 11.0, 9.2, 4.8 Hz, 1H), 3.66 (m, 2H), 3.60 (m, 3H), 3.57 (dd, <i>J</i> = 9.9, 9.2 Hz, 1H), 3.50 (t, <i>J</i> = 6.7 Hz, 2H), 3.48 (dd, <i>J</i> = 12.0, 4.8 Hz, 1H), 3.36 (t, <i>J</i> = 9.2 Hz, 1H), 2.98 (d, <i>J</i> = 9.9 Hz, 1H), 2.92 (t, <i>J</i> = 11.5 Hz, 1H), 1.64 - 1.52 (m, 2H), 1.45 - 1.31 (m, 2H), 0.94 (t, <i>J</i> = 7.4 Hz, 3H). <sup>13</sup> C NMR (100 MHz, MeOD) δ 78.5, 72.1, 71.3, 70.9, 69.4, 68.3, 68.2, 66.5, 56.2, 56.1, 53.5, 32.7, 20.3, 14.3. [ $\alpha$ ] <sub>D</sub> <sup>20</sup> = 0.10 ( <i>c</i> = 1.9, MeOD). IR/cm <sup>-1</sup> : 3379, 2958, 2931, 2873, 2515, 1631, 1458, 1249, 1091, 1033. LC/MS analysis: <i>R</i> <sub>t</sub> 2.86 min (linear gradient 10-90% B), ES: = 308.2 [M+H] <sup>+</sup> . HRMS: calcd for [C <sub>14</sub> H <sub>29</sub> O <sub>6</sub> N+H] <sup>+</sup> 308.2073 found 308.2071 [M+H] <sup>+</sup> . |
| C201 | (2S,3R)-1-(5-(((3S,5S,7S)-adamantan-1-yl)methoxy)pentyl)-2-(hydroxymethyl)-1,2,3,6-tetrahydropyridin-3-ol               |  | 9                                                                                                                                                                                                                                                                                                                                                                                                                                                                                                                                                                                                                                                                                                                                                                                                                                                                                                                                                                                                                                                             |
| C202 | (2R,3S,4S,5S)-2-(hydroxymethyl)piperidine-3,4,5-triol                                                                   |  | 4                                                                                                                                                                                                                                                                                                                                                                                                                                                                                                                                                                                                                                                                                                                                                                                                                                                                                                                                                                                                                                                             |
| C203 | (2R,3R,4R,5S)-1-(4-(2-((3R,5R,7R)-adamantan-1-yl)ethoxy)butyl)-2-(hydroxymethyl)piperidine-3,4,5-triol                  |  | <sup>1</sup> H NMR (600 MHz, D <sub>2</sub> O) δ 3.98 (d, <i>J</i> = 12.6 Hz, 1H), 3.88 (d, <i>J</i> = 12.6 Hz, 1H), 3.73 - 3.69 (m, 1H), 3.56 (t, <i>J</i> = 9.6, 1H), 3.49 - 3.45 (m, 4H), 3.41 (dd, <i>J</i> = 9.6, 9.0, 1H), 3.35 (m, 1H), 3.16 (br m, 1H), 3.06 (br m, 1H), 2.86 (d, <i>J</i> = 9.6 Hz, 1H), 2.81 (t, <i>J</i> = 11.4 Hz, 1H), 1.90 (s, 3H), 1.67 - 1.52 (m, 10H), 1.51 (s,                                                                                                                                                                                                                                                                                                                                                                                                                                                                                                                                                                                                                                                              |



|      |                                                                                  |                                                                                     |                                                                                                                                                                                                                                                                                                                                                                                                                                                                                                                                                                                                                                                                                                          |
|------|----------------------------------------------------------------------------------|-------------------------------------------------------------------------------------|----------------------------------------------------------------------------------------------------------------------------------------------------------------------------------------------------------------------------------------------------------------------------------------------------------------------------------------------------------------------------------------------------------------------------------------------------------------------------------------------------------------------------------------------------------------------------------------------------------------------------------------------------------------------------------------------------------|
|      |                                                                                  |                                                                                     | 6H), 1.35 (t, $J = 7.2$ Hz). $^{13}\text{C}$ NMR (150 MHz, $\text{D}_2\text{O}$ ) $\delta$ 77.7, 71.1, 68.9, 67.9, 67.7, 66.3, 56.0, 54.9, 53.4, 44.1, 43.4, 38.1, 32.4, 27.7, 27.6, 20.7. IR/ $\text{cm}^{-1}$ : 3358, 2899, 2846, 1647, 1450, 1023. LC/MS analysis: $R_t$ 4.60 min (linear gradient 10-90% B), ES: = 398.2 $[\text{M}+\text{H}]^+$ . HRMS: calcd for $[\text{C}_{22}\text{H}_{39}\text{O}_5\text{N}+\text{H}]^+$ 398.2901, found 398.2899 $[\text{M}+\text{H}]^+$ .                                                                                                                                                                                                                    |
| C204 | (2R,3S,4S,5S)-1-butyl-2-(hydroxymethyl)piperidine-3,4,5-triol                    | 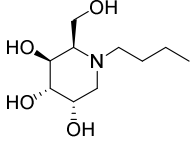   | $^1\text{H}$ NMR (400 MHz, MeOD) $\delta$ 4.20 (ddd, $J = 10.5, 5.6, 2.7$ Hz, 1H), 4.08 (dd, $J = 4.3, 1.7$ Hz, 1H), 4.01 - 3.85 (m, 3H), 3.46 - 3.44 (m, 1H), 3.30 - 3.11 (m, 4H), 1.89 - 1.63 (m, 2H), 1.41 (h, $J = 7.4$ Hz, 2H), 1.00 (t, $J = 7.4$ Hz, 3H). $^{13}\text{C}$ NMR (100 MHz, MeOD) $\delta$ 72.3, 70.0, 64.1, 61.8, 61.1, 54.9, 51.2, 25.2, 20.9, 13.9. $[\alpha]_{\text{D}}^{20} = -93.1$ ( $c = 0.08$ , MeOD). IR/ $\text{cm}^{-1}$ : 3653, 3002, 1669, 1429, 1184, 1131, 800, 722. HRMS: calcd for $[\text{C}_{10}\text{H}_{21}\text{NO}_4+\text{H}]^+$ 220.1543, found 220.1544 $[\text{M}+\text{H}]^+$ .                                                                          |
| C205 | (2R,3R,4R)-2-(hydroxymethyl)piperidine-3,4-diol                                  |  | 9                                                                                                                                                                                                                                                                                                                                                                                                                                                                                                                                                                                                                                                                                                        |
| C206 | (2R,3S,4S,5S)-2-(hydroxymethyl)-1-(5-(neopentyloxy)pentyl)piperidine-3,4,5-triol |  | $^1\text{H}$ NMR (400 MHz, MeOD) $\delta$ 4.20 (ddd, $J = 10.8, 5.3, 2.7$ Hz, 1H), 4.08 (dd, $J = 4.4, 1.8$ Hz, 1H), 4.00 - 3.82 (m, 3H), 3.46 - 3.43 (m, 1H), 3.44 (t, $J = 6.2$ Hz, 2H), 3.30 - 3.11 (m, 4H), 3.08 (s, 2H), 1.91 - 1.69 (m, 2H), 1.65 (q, $J = 7.3$ Hz, 2H), 1.47 (q, $J = 7.3$ Hz, 2H), 0.90 (s, 9H). $^{13}\text{C}$ NMR (100 MHz, MeOD) $\delta$ 82.5, 72.3, 72.1, 70.1, 64.1, 61.8, 61.2, 55.0, 51.2, 30.2, 27.1, 24.6, 23.1. $[\alpha]_{\text{D}}^{20} = -14.6$ ( $c = 0.49$ , MeOD). IR/ $\text{cm}^{-1}$ : 3648, 2954, 1669, 1184, 1135, 839, 799, 722. HRMS: calcd for $[\text{C}_{16}\text{H}_{33}\text{NO}_5+\text{H}]^+$ 320.2431, found 320.2431 $[\text{M}+\text{H}]^+$ . |
| C207 | (2R,3S,4R)-2-(hydroxymethyl)piperidine-3,4-diol                                  |  | 9                                                                                                                                                                                                                                                                                                                                                                                                                                                                                                                                                                                                                                                                                                        |

|      |                                                                                                        |  |                                                                                                                                                                                                                                                                                                                                                                                                                                                                                                                                                                                                                                                                                                                                                                                                                                                                      |
|------|--------------------------------------------------------------------------------------------------------|--|----------------------------------------------------------------------------------------------------------------------------------------------------------------------------------------------------------------------------------------------------------------------------------------------------------------------------------------------------------------------------------------------------------------------------------------------------------------------------------------------------------------------------------------------------------------------------------------------------------------------------------------------------------------------------------------------------------------------------------------------------------------------------------------------------------------------------------------------------------------------|
| C208 | (2R,3S,4S,5S)-1-(5-(((3R,5R,7R)-adamantan-1-yl)methoxy)pentyl)-2-(hydroxymethyl)piperidine-3,4,5-triol |  | <sup>1</sup> H NMR (400 MHz, MeOD) δ 4.20 (ddd, <i>J</i> = 9.3, 6.2, 2.7 Hz, 1H), 4.07 (dd, <i>J</i> = 4.5, 1.9 Hz, 1H), 3.96 (d, <i>J</i> = 4.7 Hz, 2H), 3.88 (dd, <i>J</i> = 4.6, 2.7 Hz, 1H), 3.48 (dt, <i>J</i> = 5.1, 2.5 Hz, 1H), 3.41 (t, <i>J</i> = 6.1 Hz, 2H), 3.28 (dd, <i>J</i> = 7.2, 4.1 Hz, 2H), 3.20 (d, <i>J</i> = 9.9 Hz, 2H), 2.98 (s, 2H), 1.96 - 1.94 (m, 3H), 1.83 - 1.60 (m, 10H), 1.57 - 1.56 (m, 6H), 1.46 (q, <i>J</i> = 7.4 Hz, 2H). <sup>13</sup> C NMR (100 MHz, MeOD) δ 83.1, 72.1, 71.9, 70.1, 64.0, 62.0, 60.6, 54.6, 51.2, 40.8, 38.3, 35.1, 31.1, 30.1, 29.7, 24.6. [α] <sub>D</sub> <sup>20</sup> = - 12.2 (c = 0.53, MeOD). IR/cm <sup>-1</sup> : 3668 - 2902, 1669, 1186, 1136, 800, 722, 611. HRMS: calcd for [C <sub>22</sub> H <sub>39</sub> NO <sub>5</sub> +H] <sup>+</sup> 398.2901, found: 398.2887 [M+H] <sup>+</sup> . |
| C209 | (2R,3S,4S)-1-butyl-2-(hydroxymethyl)piperidine-3,4-diol                                                |  | <sup>9</sup>                                                                                                                                                                                                                                                                                                                                                                                                                                                                                                                                                                                                                                                                                                                                                                                                                                                         |
| C210 | (2R,3S,4S,5S)-1-(5-([1,1'-biphenyl]-4-ylmethoxy)pentyl)-2-(hydroxymethyl)piperidine-3,4,5-triol        |  | <sup>1</sup> H NMR (400 MHz, MeOD) δ 7.61 (d, <i>J</i> = 8.4 Hz, 4H), 7.43 (d, <i>J</i> = 8.4 Hz, 4H), 7.38 - 7.29 (m, 1H), 4.55 (s, 2H), 4.19 (ddd, <i>J</i> = 11.1, 5.2, 2.8 Hz, 1H), 4.07 (dd, <i>J</i> = 4.4, 1.8 Hz, 1H), 4.01 - 3.84 (m, 3H), 3.56 (t, <i>J</i> = 6.2 Hz, 2H), 3.46 - 3.44 (m, 1H), 3.32 - 3.21 (m, 2H), 3.23 - 3.07 (m, 2H), 1.95 - 1.61 (m, 4H), 1.50 (q, <i>J</i> = 8.1 Hz, 2H). <sup>13</sup> C NMR (100 MHz, MeOD) δ 142.1, 141.9, 138.9, 129.9, 129.4, 128.4, 128.0, 127.9, 73.7, 72.4, 71.0, 70.1, 64.1, 61.7, 61.1, 55.0, 51.2, 30.2, 24.6, 23.0. [α] <sub>D</sub> <sup>20</sup> = - 10.0 (c = 0.20, MeOH). IR/cm <sup>-1</sup> : 3718, 2989, 1673, 1179, 1134. HRMS: calcd for [C <sub>24</sub> H <sub>33</sub> NO <sub>5</sub> +H] <sup>+</sup> 416.2431, found 416.2430 [M+H] <sup>+</sup> .                                        |
| C211 | (2R,3R,4R)-1-butyl-2-(hydroxymethyl)piperidine-3,4-diol                                                |  | <sup>9</sup>                                                                                                                                                                                                                                                                                                                                                                                                                                                                                                                                                                                                                                                                                                                                                                                                                                                         |
| C212 | (2R,3S,4S,5S)-2-(hydroxymethyl)-1-nonylpiperidine-3,4,5-triol                                          |  | <sup>1</sup> H NMR (400 MHz, MeOD) δ 4.20 (ddd, <i>J</i> = 10.4, 5.4, 2.7 Hz, 1H), 4.08 (dd, <i>J</i> = 4.4, 1.8 Hz, 1H), 4.01 - 3.81 (m, 3H), 3.46 (d, <i>J</i> = 4.8 Hz, 1H), 3.29 - 3.06 (m, 4H), 1.89 - 1.60 (m, 2H), 1.46 - 1.26 (m, 12H), 0.90 (t, <i>J</i> = 8.0 Hz,                                                                                                                                                                                                                                                                                                                                                                                                                                                                                                                                                                                          |

|      |                                                                                                                                                                   |  |                                                                                                                                                                                                                                                                                                                                                                                                                                                                                                                                                                                                                                                           |
|------|-------------------------------------------------------------------------------------------------------------------------------------------------------------------|--|-----------------------------------------------------------------------------------------------------------------------------------------------------------------------------------------------------------------------------------------------------------------------------------------------------------------------------------------------------------------------------------------------------------------------------------------------------------------------------------------------------------------------------------------------------------------------------------------------------------------------------------------------------------|
|      |                                                                                                                                                                   |  | 3H). $^{13}\text{C}$ NMR (100 MHz, MeOD) $\delta$ 72.3, 70.1, 64.1, 61.7, 61.1, 55.1, 51.2, 33.0, 30.5, 30.3, 30.2, 27.7, 23.7, 23.2, 14.4. $[\alpha]_D^{20} = -15.4$ ( $c = 0.59$ , MeOD). IR/cm $^{-1}$ : 3685 - 2927, 1668, 1184, 1135, 838, 799, 722. HRMS: calcd for $[\text{C}_{15}\text{H}_{31}\text{NO}_4 + \text{H}]^+$ 290.2326, found 290.2323 $[\text{M} + \text{H}]^+$ .                                                                                                                                                                                                                                                                     |
| C213 | (2R,3R,4S)-1-(5-(((3R,5R,7R)-adamantan-1-yl)methoxy)pentyl)-2-(hydroxymethyl)piperidine-3,4-diol                                                                  |  | 9                                                                                                                                                                                                                                                                                                                                                                                                                                                                                                                                                                                                                                                         |
| C214 | (2S,3S,4S)-1-(5-(((3S,5S,7S)-adamantan-1-yl)methoxy)pentyl)-2-(hydroxymethyl)piperidine-3,4-diol                                                                  |  | 9                                                                                                                                                                                                                                                                                                                                                                                                                                                                                                                                                                                                                                                         |
| C215 | (2S,3R,4R,5S)-2-(hydroxymethyl)-1-(2-(2-(neopentyloxy)ethoxy)ethyl)piperidine-3,4,5-triol                                                                         |  | $^1\text{H}$ NMR (400 MHz, $\text{CDCl}_3$ ) $\delta$ 3.99-3.83 (m, 6H), 3.77 (br s, 1H), 3.69-3.67 (m, 2H), 3.63 - 3.59 (br m, 3H), 3.57 - 3.38 (br m, 4H $^*$ ), 3.14 (s, 2H neopentyl), 0.92 (s, 9H neopentyl). $^{13}\text{C}$ NMR (100 MHz, $\text{CDCl}_3$ ) $\delta$ 82.9, 71.9, 71.7, 71.3, 69.4, 69.0, 66.4, 64.3, 59.6, 54.2, 54.1, 27.1. IR/cm $^{-1}$ : 3394, 2954, 2515, 1674, 1458, 1199, 1134, 1091. LC/MS analysis: $R_t$ 3.88 min (linear gradient 10-90% B), ES: = 322.3 $[\text{M} + \text{H}]^+$ . HRMS: calcd for $[\text{C}_{15}\text{H}_{31}\text{O}_6\text{N} + \text{H}]^+$ 322.2230, found 322.2230 $[\text{M} + \text{H}]^+$ . |
| C216 | (2S,2'S,3R,3'R,4R,4'R,5S,5'S)-1,1'-((((1R,3R,5S,7S)-adamantane-1,3-diyl)bis(methylene))bis(oxy))bis(pentane-5,1-diyl)bis(2-(hydroxymethyl)piperidine-3,4,5-triol) |  | 12                                                                                                                                                                                                                                                                                                                                                                                                                                                                                                                                                                                                                                                        |
| C217 | (2S,3R,4R,5R)-1-(5-(((3S,5S,7S)-adamantan-1-yl)methoxy)pentyl)-2-(hydroxymethyl)piperidine-3,4,5-triol                                                            |  | $^1\text{H}$ NMR (400 MHz, MeOD) $\delta$ 3.98 (ddd, $J = 3.3, 4.4, 9.7$ Hz, 1H), 3.92 (dd, $J = 2.6, 4.7$ Hz, 1H), 3.84 (dd, $J = 5.3, 11.5$ Hz, 1H), 3.79 (dd, $J = 4.7, 11.5$ Hz, 1H), 3.76 (dd, $J = 3.3, 4.7$ Hz, 1H), 3.39 (t, $J = 6.4$ Hz, 2H), 2.97 (s, 2H), 2.79 - 2.76 (m, 1H), 2.75 - 2.69 (m, 2H), 2.66 - 2.57 (m, 2H), 1.95 (s, 3H), 1.72 (dd, $J = 11.7, 30.9$ Hz, 6H), 1.63 - 1.50 (m, 10H), 1.39 - 1.27 (m, 2H). $^{13}\text{C}$ NMR (100 MHz, MeOD) $\delta$ 83.2, 73.1, 72.7, 72.3, 67.6, 61.7, 60.9, 55.0,                                                                                                                            |

|      |                                                                                                                              |  |                                                                                                                                                                                                                                                                                                                                                                                                                                                                                                                                                                                                                                                                                                                                                                                                                             |
|------|------------------------------------------------------------------------------------------------------------------------------|--|-----------------------------------------------------------------------------------------------------------------------------------------------------------------------------------------------------------------------------------------------------------------------------------------------------------------------------------------------------------------------------------------------------------------------------------------------------------------------------------------------------------------------------------------------------------------------------------------------------------------------------------------------------------------------------------------------------------------------------------------------------------------------------------------------------------------------------|
|      |                                                                                                                              |  | 53.2, 41.0, 38.5, 35.3, 30.7, 29.9, 25.5, 25.4. $[\alpha]_D^{20} = +24.5$ (c = 0.4, MeOH). IR/cm <sup>-1</sup> : 3359, 2902, 2848, 1453, 1065, 1057. HRMS: calcd for [C <sub>22</sub> H <sub>39</sub> O <sub>5</sub> N+H] <sup>+</sup> 398.2901, found 398.2899 [M+H] <sup>+</sup> .                                                                                                                                                                                                                                                                                                                                                                                                                                                                                                                                        |
| C218 | (2R,3R,4R,5S)-1-((5-(((3R,5R,7R)-adamantan-1-yl)methoxy)pentyl)oxy)-2-(hydroxymethyl)piperidine-3,4,5-triol                  |  | <sup>1</sup> H NMR (400 MHz, MeOD) δ 3.93 (dd, <i>J</i> = 3.1, 11.2 Hz, 1H), 3.87 - 3.78 (m, 1H), 3.75 (t, <i>J</i> = 6.3 Hz, 2H), 3.50 - 3.44 (m, 1H), 3.47 (dd, <i>J</i> = 4.5, 11.4 Hz, 1H), 3.39 (t, <i>J</i> = 6.3 Hz, 2H), 3.19 (dd, <i>J</i> = 8.9 Hz, 1H), 2.97 (s, 2H), 2.50 - 2.36 (m, 1H), 1.95 (s, 3H), 1.72 (dd, <i>J</i> = 11.6, 30.4 Hz, 6H), 1.63 - 1.52 (m, 10H), 1.47 - 1.38 (m, 2H). <sup>13</sup> C NMR (100 MHz, MeOD) δ 83.2, 80.4, 74.0, 72.7, 70.6, 69.2, 61.4, 60.2, 41.0, 38.5, 35.3, 30.7, 29.8, 29.9, 24.3. $[\alpha]_D^{20} = +1.0$ (c = 0.4, MeOH). IR/cm <sup>-1</sup> : 3359, 2902, 2849, 1453, 1105, 1043. HRMS: calcd for [C <sub>22</sub> H <sub>39</sub> O <sub>6</sub> N+H] <sup>+</sup> 414.2850, found 414.2848 [M+H] <sup>+</sup> .                                                 |
| C219 | (2R,3S,4R,5R)-1-butyl-2-(hydroxymethyl)piperidine-3,4,5-triol                                                                |  | <sup>1</sup> H NMR (400 MHz, D <sub>2</sub> O) δ 4.29 - 4.24 (m, 1H), 4.22 (s, 1H), 3.99 (qd, <i>J</i> = 12.9, 5.0 Hz, 2H), 3.83 (t, <i>J</i> = 3.4 Hz, 1H), 3.55 (dd, <i>J</i> = 13.5, 3.3 Hz, 1H), 3.45 (m, 1H), 3.42 - 3.33 (dd, <i>J</i> = 13.5, 1.2 Hz, 1H), 3.28 (m, Hz, 2H), 1.70 (m, 2H), 1.35 (h, <i>J</i> = 7.4 Hz, 2H), 0.91 (t, <i>J</i> = 7.4 Hz, 3H). <sup>13</sup> C NMR (100 MHz, D <sub>2</sub> O) δ 69.95, 66.93, 66.85, 64.44, 59.20, 55.40, 53.17, 23.88, 19.31, 12.78. $[\alpha]_D^{20} = -13.5$ (c = 0.6, MeOH). IR/cm <sup>-1</sup> : 3310, 2967, 2878, 1671, 1420, 1200, 1130, 1103, 1065. LCMS: 0-20, <i>R</i> <sub>t</sub> 2.11 min, [M+H] <sup>+</sup> = 220.00. HRMS: calcd for [C <sub>10</sub> H <sub>21</sub> NO <sub>4</sub> +H] <sup>+</sup> 220.1543, found 220.1547 [M+H] <sup>+</sup> . |
| C220 | (2S,3S,4S,5R,6R)-N-(5-(((3S,5S,7S)-adamantan-1-yl)methoxy)pentyl)-3,4,5-trihydroxy-6-(hydroxymethyl)piperidine-2-carboxamide |  | 6                                                                                                                                                                                                                                                                                                                                                                                                                                                                                                                                                                                                                                                                                                                                                                                                                           |

|      |                                                                                                                                      |                                                                                     |                                                                                                                                                                                                                                                                                                                                                                                                                                                                                                                                                                                                                                                                                                                                                                                                                                                                       |
|------|--------------------------------------------------------------------------------------------------------------------------------------|-------------------------------------------------------------------------------------|-----------------------------------------------------------------------------------------------------------------------------------------------------------------------------------------------------------------------------------------------------------------------------------------------------------------------------------------------------------------------------------------------------------------------------------------------------------------------------------------------------------------------------------------------------------------------------------------------------------------------------------------------------------------------------------------------------------------------------------------------------------------------------------------------------------------------------------------------------------------------|
| C221 | (2R,3S,4R,5R)-2-(hydroxymethyl)-1-nonylpiperidine-3,4,5-triol                                                                        | 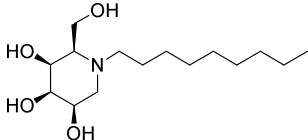   | $^1\text{H NMR}$ (400 MHz, $\text{D}_2\text{O}$ ) $\delta$ 4.25 (s, 1H), 4.20 (s, 1H), 3.97 (m, 2H), 3.82 (t, $J = 3.1$ Hz, 1H), 3.51 (dd, $J = 13.4$ , 2.8 Hz, 1H), 3.42 (s, 1H), 3.35 (d, $J = 12.8$ Hz, 1H), 3.29 - 3.21 (m, 2H), 1.70 (m, 2H), 1.27 (m, 12H), 0.86 - 0.78 (m, 3H). $^{13}\text{C NMR}$ (100 MHz, $\text{D}_2\text{O}$ ) $\delta$ 70.0, 66.9, 66.9, 64.5, 59.3, 55.5, 53.4, 31.3, 28.7, 28.6, 28.4, 25.9, 22.2, 21.8, 13.50. $[\alpha]_{\text{D}}^{20} = -15.8$ (c = 0.5, MeOH). IR/ $\text{cm}^{-1}$ : 3310, 2995, 2928, 2859, 1670, 1420, 1200, 1185, 1130, 1069. HRMS: calcd for $[\text{C}_{15}\text{H}_{31}\text{NO}_4 + \text{H}]^+$ 290.2326, found 290.2332 $[\text{M} + \text{H}]^+$ .                                                                                                                                                    |
| C222 | (2S,3S,4S,5R,6R)-1-(5-(((3S,5S,7S)-adamantan-1-yl)methoxy)pentyl)-3,4,5-trihydroxy-6-(hydroxymethyl)piperidine-2-carboxamide         |    | <sup>6</sup>                                                                                                                                                                                                                                                                                                                                                                                                                                                                                                                                                                                                                                                                                                                                                                                                                                                          |
| C223 | (2S,3R,4S,5R)-1-butyl-2-(hydroxymethyl)piperidine-3,4,5-triol                                                                        |   | $^1\text{H NMR}$ (400 MHz, $\text{D}_2\text{O}$ ) $\delta$ 4.27 (s, 1H), 4.08 (td, $J = 11.0$ , 5.2 Hz, 1H), 3.98 (m, 2H), 3.60 (dd, $J = 9.8$ , 3.0 Hz, 1H), 3.52 (dd, $J = 12.2$ , 5.2 Hz, 1H), 3.45 (t, $J = 4.1$ Hz, 1H), 3.29 (dt, $J = 11.7$ , 6.5 Hz, 1H), 3.21 (td, $J = 13.4$ , 12.5, 5.4 Hz, 1H), 2.98 (t, $J = 11.8$ Hz, 1H), 1.74 - 1.64 (m, 2H), 1.41 - 1.32 (m, 2H), 0.92 (t, $J = 7.4$ Hz, 3H). $^{13}\text{C NMR}$ (100 MHz, $\text{D}_2\text{O}$ ) $\delta$ 72.6, 69.9, 64.5, 63.9, 59.1, 53.3, 53.2, 23.8, 19.3, 12.7. $[\alpha]_{\text{D}}^{20} = -6.9$ (c = 0.5, MeOH). IR/ $\text{cm}^{-1}$ : 3333, 2970, 2940, 2878, 1674, 1420, 1200, 1134, 1084. LCMS: 0-20, $R_t$ 1.91 min, $[\text{M} + \text{H}]^+ = 220.07$ . HRMS: calcd for $[\text{C}_{10}\text{H}_{21}\text{NO}_4 + \text{H}]^+$ 220.1543, found 220.1547 $[\text{M} + \text{H}]^+$ . |
| C224 | (2S,3S,4S,5R,6R)-N-(5-(((3S,5S,7S)-adamantan-1-yl)methoxy)pentyl)-1-butyl-3,4,5-trihydroxy-6-(hydroxymethyl)piperidine-2-carboxamide |  | <sup>6</sup>                                                                                                                                                                                                                                                                                                                                                                                                                                                                                                                                                                                                                                                                                                                                                                                                                                                          |
| C225 | (2S,3R,4S,5R)-2-(hydroxymethyl)-1-nonylpiperidine-3,4,5-triol                                                                        |  | $^1\text{H NMR}$ (400 MHz, $\text{D}_2\text{O}$ ) $\delta$ 4.23 (m, 1H), 4.04 (td, $J = 10.6$ , 5.1 Hz, 1H), 3.94 (d, $J = 4.4$ Hz, 2H), 3.56 (dd, $J = 9.7$ , 2.9 Hz, 1H), 3.47 (dd, $J = 12.2$ , 5.1 Hz, 1H), 3.41 (t, $J = 4.2$ Hz, 1H), 3.21 (m, 2H), 2.94 (t, $J = 11.8$ Hz, 1H), 1.77                                                                                                                                                                                                                                                                                                                                                                                                                                                                                                                                                                           |

|      |                                                                                                                                   |  |                                                                                                                                                                                                                                                                                                                                                                                                                                                                                                                                                                                                                                                                                                                                                                                                                                |
|------|-----------------------------------------------------------------------------------------------------------------------------------|--|--------------------------------------------------------------------------------------------------------------------------------------------------------------------------------------------------------------------------------------------------------------------------------------------------------------------------------------------------------------------------------------------------------------------------------------------------------------------------------------------------------------------------------------------------------------------------------------------------------------------------------------------------------------------------------------------------------------------------------------------------------------------------------------------------------------------------------|
|      |                                                                                                                                   |  | - 1.57 (m, 2H), 1.38 - 1.16 (m, 12H - H <sub>2</sub> -8), 0.80 (t, <i>J</i> = 6.4 Hz, 3H). <sup>13</sup> C NMR (100 MHz, D <sub>2</sub> O) δ 72.6, 69.9, 64.5, 63.8, 59.1, 53.4, 53.3, 31.1, 28.4, 28.3, 28.1, 25.6, 22.0, 21.6, 13.4. [α] <sup>20</sup> <sub>D</sub> = - 0.5 (c = 0.6, MeOH). IR/cm <sup>-1</sup> : 3333, 2928, 2855, 1674, 1204, 1184, 1134, 1080. LCMS: 0-50, R <sub>t</sub> 8.96 min, [M+H] <sup>+</sup> = 290.20. HRMS: calcd for [C <sub>15</sub> H <sub>31</sub> NO <sub>4</sub> +H] <sup>+</sup> 290.2326, found 290.2331 [M+H] <sup>+</sup> .                                                                                                                                                                                                                                                         |
| C226 | (2S,3S,4S,5R,6R)-N,1-bis(5-(((3S,5S,7S)-adamantan-1-yl)methoxy)pentyl)-3,4,5-trihydroxy-6-(hydroxymethyl)piperidine-2-carboxamide |  | 6                                                                                                                                                                                                                                                                                                                                                                                                                                                                                                                                                                                                                                                                                                                                                                                                                              |
| C227 | (2S,3R,4S,5R)-1-(5-(((3S,5S,7S)-adamantan-1-yl)methoxy)pentyl)-2-(hydroxymethyl)piperidine-3,4,5-triol                            |  | <sup>1</sup> H NMR (400 MHz, D <sub>2</sub> O) δ 4.24 (s, 1H), 4.06 (td, <i>J</i> = 10.5, 4.9 Hz, 1H), 3.95 (d <i>J</i> = 4.0 Hz, 2H), 3.58 (d, <i>J</i> = 7.9 Hz, 1H), 3.58 - 3.41 (m, 4H), 3.30 - 3.19 (m, 2H), 3.01 (s, 2H), 2.94 (t, <i>J</i> = 11.6 Hz, 1H), 1.90 (s, 3H, CH), 1.72 - 1.54 (m, 10H), 1.48 (s, 6H), 1.43 - 1.28 (m, 2H). <sup>13</sup> C NMR (100 MHz, D <sub>2</sub> O) δ 81.6, 72.5, 71.3, 69.8, 64.4, 64.1, 59.2, 53.4, 53.2, 39.2, 36.8, 33.6, 28.1, 28.0, 22.6, 21.7. [α] <sup>20</sup> <sub>D</sub> = -5.7 (c = 0.4, MeOH). IR/cm <sup>-1</sup> : 3310, 2901, 2847, 1674, 1454, 1204, 1184, 1334. LCMS: 10-50, R <sub>t</sub> 9.59 min, [M+H] <sup>+</sup> = 398.33. HRMS: calcd for [C <sub>22</sub> H <sub>39</sub> NO <sub>5</sub> +H] <sup>+</sup> 398.2901, found 398.2901 [M+H] <sup>+</sup> . |
| C228 | (2S,3S,4S,5R,6S)-3,4,5-trihydroxy-6-(hydroxymethyl)-N-pentylpiperidine-2-carboxamide                                              |  | 6                                                                                                                                                                                                                                                                                                                                                                                                                                                                                                                                                                                                                                                                                                                                                                                                                              |
| C229 | (2S,3S,4R,5R)-1-butyl-2-(hydroxymethyl)piperidine-3,4,5-triol                                                                     |  | <sup>1</sup> H NMR (400 MHz, D <sub>2</sub> O) δ 4.15 (s, 1H), 4.08 - 3.90 (m, 3H), 3.85 (dd, <i>J</i> = 10.7, 2.4 Hz, 1H), 3.41 - 3.10 (m, 5H), 1.82 - 1.57 (m, 2H), 1.40 - 1.32 (m, 2H), 0.90 (t, <i>J</i> = 7.4 Hz, 3H). <sup>13</sup> C NMR (100 MHz, D <sub>2</sub> O) δ 69.6, 64.8, 63.9, 60.2, 53.4, 53.2, 48.8, 24.4, 19.3, 12.8. [α] <sup>20</sup> <sub>D</sub> = +4.2 (c = 0.6, MeOH). IR/cm <sup>-1</sup> : 3333, 2970, 2940, 2882, 1674, 1435, 1200, 1134, 1080, 1045. LCMS: 0-20, R <sub>t</sub> 2.21 min, [M+H] <sup>+</sup> = 220.07. HRMS: calcd for [C <sub>10</sub> H <sub>21</sub> NO <sub>4</sub> +H] <sup>+</sup> 220.1543,                                                                                                                                                                               |

|      |                                                                                                                                       |  |                                                                                                                                                                                                                                                                                                                                                                                                                                                                                                                                                                                                                                                                                          |
|------|---------------------------------------------------------------------------------------------------------------------------------------|--|------------------------------------------------------------------------------------------------------------------------------------------------------------------------------------------------------------------------------------------------------------------------------------------------------------------------------------------------------------------------------------------------------------------------------------------------------------------------------------------------------------------------------------------------------------------------------------------------------------------------------------------------------------------------------------------|
|      |                                                                                                                                       |  | found 220.1547 [M+H] <sup>+</sup> .                                                                                                                                                                                                                                                                                                                                                                                                                                                                                                                                                                                                                                                      |
| C230 | (2S,3S,4S,5R,6S)-1-butyl-3,4,5-trihydroxy-6-(hydroxymethyl)-N-pentylpiperidine-2-carboxamide                                          |  | 6                                                                                                                                                                                                                                                                                                                                                                                                                                                                                                                                                                                                                                                                                        |
| C231 | (2S,3S,4R,5R)-2-(hydroxymethyl)-1-nonylpiperidine-3,4,5-triol                                                                         |  | <sup>1</sup> H NMR (400 MHz, D <sub>2</sub> O) δ 4.13 (s, 1H), 4.08 - 3.93 (m, 2H), 3.93 - 3.78 (m, 2H), 3.35 - 3.07 (m, 5H), 1.68 (s, 2H), 1.26 (m, 12H), 0.82 (t, <i>J</i> = 6.6 Hz, 3H). <sup>13</sup> C NMR (100 MHz, D <sub>2</sub> O) δ 69.6, 64.8, 63.9, 60.2, 53.6, 53.2, 48.9, 31.6, 29.2, 28.9, 28.8, 26.2, 22.4, 13.7. [α] <sub>D</sub> <sup>20</sup> = 5.2 (c = 0.9, MeOH). IR/cm <sup>-1</sup> : 3310, 2928, 2859, 1670, 1420, 1184, 1130, 1076, 1045. LCMS: 0-50, R <sub>t</sub> 8.81 min, [M+H] <sup>+</sup> = 290.13. HRMS: calcd for [C <sub>15</sub> H <sub>31</sub> NO <sub>4</sub> +H] <sup>+</sup> 290.2326, found 290.2332 [M+H] <sup>+</sup> .                    |
| C232 | (2S,3S,4S,5R,6S)-1-(5-(((3S,5S,7S)-adamantan-1-yl)methoxy)pentyl)-3,4,5-trihydroxy-6-(hydroxymethyl)-N-pentylpiperidine-2-carboxamide |  | 6                                                                                                                                                                                                                                                                                                                                                                                                                                                                                                                                                                                                                                                                                        |
| C233 | (2R,3R)-2-(hydroxymethyl)piperidin-3-ol                                                                                               |  | 9                                                                                                                                                                                                                                                                                                                                                                                                                                                                                                                                                                                                                                                                                        |
| C234 | (2R,3R,4R,5R)-2-(hydroxymethyl)-1-(5-(neopentyloxy)pentyl)piperidine-3,4,5-triol                                                      |  | <sup>1</sup> H NMR (400 MHz, MeOD) δ 4.16 - 4.02 (m, 2H), 4.01 - 3.85 (m, 2H), 3.59 - 3.50 (m, 1H), 3.45 (t, <i>J</i> = 6.2 Hz, 2H), 3.44 - 3.43 (m, 1H), 3.32 - 3.28 (m, 3H), 3.29 (s, 2H), 3.05 - 2.96 (m, 1H), 1.81 - 1.74 (m, 2H), 1.65 (q, <i>J</i> = 8.2 Hz, 2H), 1.47 (q, <i>J</i> = 8.2 Hz, 2H), 0.90 (s, 9H). <sup>13</sup> C NMR (100 MHz, MeOD) δ 82.5, 74.3, 72.0, 67.8, 67.2, 67.0, 56.1, 54.5, 32.9, 30.2, 27.1, 24.6. [α] <sub>D</sub> <sup>20</sup> = -21.2 (c = 0.15, MeOD). IR/cm <sup>-1</sup> : 3634, 2956, 1669, 1172, 1204, 1113. HRMS : calcd for [C <sub>16</sub> H <sub>33</sub> NO <sub>5</sub> +H] <sup>+</sup> 320.2431, found 320.2429 [M+H] <sup>+</sup> . |

|      |                                                                                                           |  |                                                                                                                                                                                                                                                                                                                                                                                                                                                                                                                                                                                                                                                                                                                                                                                                                                                                                                 |
|------|-----------------------------------------------------------------------------------------------------------|--|-------------------------------------------------------------------------------------------------------------------------------------------------------------------------------------------------------------------------------------------------------------------------------------------------------------------------------------------------------------------------------------------------------------------------------------------------------------------------------------------------------------------------------------------------------------------------------------------------------------------------------------------------------------------------------------------------------------------------------------------------------------------------------------------------------------------------------------------------------------------------------------------------|
| C235 | (2R,3S)-1-(5-(((3R,5R,7R)-adamantan-1-yl)methoxy)pentyl)-2-(hydroxymethyl)-1,2,3,6-tetrahydropyridin-3-ol |  | 9                                                                                                                                                                                                                                                                                                                                                                                                                                                                                                                                                                                                                                                                                                                                                                                                                                                                                               |
| C236 | (2R,3R,4R,5R)-1-(5-(((3R,5R,7R)-adamantan-1-yl)methoxy)pentyl)-2-(hydroxymethyl)piperidine-3,4,5-triol    |  | <sup>1</sup> H NMR (400 MHz, MeOD) δ 4.16 - 4.00 (m, 2H), 4.01 - 3.87 (m, 2H), 3.55 (dd, <i>J</i> = 9.1, 3.0 Hz, 1H), 3.50 - 3.35 (m, 4H), 3.12 - 2.99 (m, 1H), 2.98 (s, 2H), 1.95 (s, 3H), 1.83 - 1.60 (m, 10H), 1.57 - 1.55 (m, 6H), 1.46 (q, <i>J</i> = 8.2 Hz, 2H). <sup>13</sup> C NMR (100 MHz, MeOD) δ 83.1, 74.2, 72.1, 67.8, 67.2, 66.9, 56.0, 54.5, 40.9, 38.3, 35.1, 30.2, 29.8, 24.6, 23.5. [ $\alpha$ ] <sub>D</sub> <sup>20</sup> = -16.8 (c = 0.19, MeOD). IR/cm <sup>-1</sup> : 3685, 2997, 1669, 1200, 1129, 831, 800, 719. HRMS: calcd for [C <sub>22</sub> H <sub>39</sub> NO <sub>5</sub> +H] <sup>+</sup> 298.2901, found 298.2891 [M+H] <sup>+</sup> .                                                                                                                                                                                                                    |
| C237 | (2R,3R)-1-butyl-2-(hydroxymethyl)-1,2,3,6-tetrahydropyridin-3-ol                                          |  | 9                                                                                                                                                                                                                                                                                                                                                                                                                                                                                                                                                                                                                                                                                                                                                                                                                                                                                               |
| C238 | (2S,3R,4R,5S)-1-(4-(2-((3S,5S,7S)-adamantan-1-yl)ethoxy)butyl)-2-(hydroxymethyl)piperidine-3,4,5-triol    |  | <sup>1</sup> H NMR (600 MHz, D <sub>2</sub> O) δ 3.82 - 3.79 (m, 2H), 3.68 (dd, <i>J</i> = 8.4, 4.8 Hz, 1H), (ddd, <i>J</i> = 10.2, 9.0, 5.4 Hz, 1H), 3.47 (t, <i>J</i> = 7.2 Hz, 2H), 3.41 (br s, 2H), 3.37 (dd, <i>J</i> = 8.4, 7.8 Hz, 1H), 3.02 (m, 1H), 2.80 - 2.75 (m, 2H), 2.66 (br m, 1H), 2.57 (dd, <i>J</i> = 12.0, 10.2 Hz, 1H), 1.92 (s, 3H), 1.75 - 1.66 (m, 6H), 1.56 - 1.35 (m, 10H), 1.35 (t, <i>J</i> = 7.2 Hz, 2H). <sup>13</sup> C NMR (150 MHz, MeOD) δ 75.8, 72.8, 71.7, 71.3, 67.8, 64.4, 57.7, 55.3, 52.8, 44.8, 43.9, 38.2, 32.8, 30.2, 28.5, 25.4. IR/cm <sup>-1</sup> : 3342, 2899, 2846, 1654, 1450, 1062. LC/MS analysis: <i>R</i> <sub>t</sub> 7.27 min (linear gradient 10-90% B), ES: = 398.2 [M+H] <sup>+</sup> . HRMS: calcd for [C <sub>22</sub> H <sub>39</sub> O <sub>5</sub> N <sub>1</sub> +H] <sup>+</sup> 398.2901, found 398.2899 [M+H] <sup>+</sup> . |
| C239 | (2R,3R,4R,5R)-2-(hydroxymethyl)-1-nonylpiperidine-3,4,5-triol                                             |  | <sup>1</sup> H NMR (400 MHz, MeOD) δ 4.15 - 4.03 (m, 2H), 4.02 - 3.82 (m, 2H), 3.59 - 3.49 (m, 1H), 3.44 (dd, <i>J</i> = 12.8, 3.8 Hz, 1H), 3.34 - 3.32 (m, 3H), 3.03 - 3.0 (m, 1H), 1.83 - 1.60 (m, 2H), 1.54 - 1.13 (m, 12H), 0.90 (t, <i>J</i> = 8.2 Hz, 3H). <sup>13</sup> C NMR (100 MHz, MeOD) δ 74.2, 67.8, 67.2, 67.0, 56.0, 54.6, 33.0, 30.5,                                                                                                                                                                                                                                                                                                                                                                                                                                                                                                                                          |



|      |                                                                                                  |  |                                                                                                                                                                                                                                                                                                                                                                                                                                                                                                                                    |
|------|--------------------------------------------------------------------------------------------------|--|------------------------------------------------------------------------------------------------------------------------------------------------------------------------------------------------------------------------------------------------------------------------------------------------------------------------------------------------------------------------------------------------------------------------------------------------------------------------------------------------------------------------------------|
|      |                                                                                                  |  | 30.3, 30.2, 27.6, 23.7. $[\alpha]_D^{20} = -20.8$ (c = 0.17, MeOH). IR/cm <sup>-1</sup> : 3560, 2924, 1669, 1207, 1175, 1127. HRMS: calcd for [C <sub>15</sub> H <sub>31</sub> NO <sub>4</sub> +H] <sup>+</sup> 290.2326, found: 290.2328 [M+H] <sup>+</sup> .                                                                                                                                                                                                                                                                     |
| C240 | (2R,3R,4R)-1-(5-(((3R,5R,7R)-adamantan-1-yl)methoxy)pentyl)-2-(hydroxymethyl)piperidine-3,4-diol |  | 9                                                                                                                                                                                                                                                                                                                                                                                                                                                                                                                                  |
| C241 | (2R,3R,4R,5R)-2-(hydroxymethyl)piperidine-3,4,5-triol                                            |  | <sup>1</sup> H NMR (600 MHz, D <sub>2</sub> O) δ 4.17 (s, 1H), 3.91 (d, J = 12.6 Hz, 1H), 3.80 - 3.74 (m, 2H), 3.61 (d, J = 9.3 Hz, 1H), 3.33 (d, J = 13.5 Hz, 1H), 3.17 (d, J = 13.5 Hz, 1H), 3.09 - 3.06 (m, 1H). <sup>13</sup> C NMR (150 MHz, D <sub>2</sub> O) δ 73.2, 66.6, 61.2, 58.9, 48.4. $[\alpha]_D^{20} = -2.1$ (c = 0.17 MeOH). IR/cm <sup>-1</sup> : 3678, 2619, 1629, 1442, 1033. HRMS: calcd for [C <sub>6</sub> H <sub>13</sub> NO <sub>4</sub> + H] <sup>+</sup> 164.0917, found: 164.0916 [M+H] <sup>+</sup> . |
| C242 | (2R,3R,4S)-1-butyl-2-(hydroxymethyl)piperidine-3,4-diol                                          |  | 9                                                                                                                                                                                                                                                                                                                                                                                                                                                                                                                                  |
| C243 | (2R,3R,4R,5R)-1-(2-hydroxyethyl)-2-(hydroxymethyl)piperidine-3,4,5-triol                         |  | <sup>1</sup> H NMR (600 MHz, MeOD) δ 4.15 - 4.06 (m, 2H), 4.01 - 3.98 (m, 2H), 3.97 - 3.93 (m, 2H), 3.64 - 3.52 (m, 3H), 3.46 - 3.44 (m, 1H), 3.37 - 3.35 (m, 1H), 3.18 - 3.17 (m, 1H). <sup>13</sup> C NMR (150 MHz, MeOD) δ 74.2, 68.6, 67.1, 67.0, 56.6, 56.4, 55.9, 55.7. $[\alpha]_D^{20} = -20.7$ (c = 0.05, MeOD). IR/cm <sup>-1</sup> : 3741 - 2786, 1635, 1084, 611. HRMS: calcd for [C <sub>8</sub> H <sub>17</sub> NO <sub>5</sub> +H] <sup>+</sup> 208.1185, found 208.1180 [M+H] <sup>+</sup> .                       |
| C244 | (2R,3S,4R)-1-butyl-2-(hydroxymethyl)piperidine-3,4-diol                                          |  | 9                                                                                                                                                                                                                                                                                                                                                                                                                                                                                                                                  |

|      |                                                                                         |                                                                                     |                                                                                                                                                                                                                                                                                                                                                                                                                                                                                                                                                                                                                                                                                                                                                                                                                                                  |
|------|-----------------------------------------------------------------------------------------|-------------------------------------------------------------------------------------|--------------------------------------------------------------------------------------------------------------------------------------------------------------------------------------------------------------------------------------------------------------------------------------------------------------------------------------------------------------------------------------------------------------------------------------------------------------------------------------------------------------------------------------------------------------------------------------------------------------------------------------------------------------------------------------------------------------------------------------------------------------------------------------------------------------------------------------------------|
| C245 | (2R,3R,4S,5S)-2-(hydroxymethyl)piperidine-3,4,5-triol                                   | 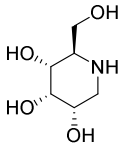   | <sup>1</sup> H NMR (600 MHz, D <sub>2</sub> O) δ 4.02 (s, 1H), 3.85 (ddd, <i>J</i> = 11.8, 4.8, 2.3 Hz, 1H), 3.79 (dd, <i>J</i> = 12.7, 2.9 Hz, 1H), 3.75 - 3.64 (m, 2H), 3.22 - 3.15 (m, 1H), 3.12 (dd, <i>J</i> = 11.8, 4.8 Hz, 1H), 2.98 (t, <i>J</i> = 11.8 Hz, 1H). <sup>13</sup> C NMR (150 MHz, D <sub>2</sub> O) δ 70.7, 66.1, 65.3, 58.4, 55.5, 42.3. [α] <sub>D</sub> <sup>20</sup> = + 8.2 (c = 0.12, MeOH). IR/cm <sup>-1</sup> : 3690, 3018, 1634, 1061, 1033, 1015. HRMS: calcd for [C <sub>6</sub> H <sub>13</sub> NO <sub>4</sub> +H] <sup>+</sup> 164.0917, found 164.0916 [M+H] <sup>+</sup> .                                                                                                                                                                                                                                 |
| C246 | (2R,3S)-1-butyl-2-(hydroxymethyl)-1,2,3,6-tetrahydropyridin-3-ol                        |    | 9                                                                                                                                                                                                                                                                                                                                                                                                                                                                                                                                                                                                                                                                                                                                                                                                                                                |
| C247 | (2R,3R,4S,5S)-2-(hydroxymethyl)-1-(5-(nonyloxy)pentyl)piperidine-3,4,5-triol            |    | <sup>1</sup> H NMR (400 MHz, MeOD) δ 4.05 - 4.02 (m, 2H), 3.91 (dd, <i>J</i> = 12.4, 3.2 Hz, 1H), 3.83 (ddd, <i>J</i> = 9.4, 7.1, 2.4 Hz, 1H), 3.75 (dd, <i>J</i> = 10.3, 2.4 Hz, 1H), 3.47 - 3.41 (m, 4H), 3.28 - 3.22 (m, 1H), 3.18 - 3.11 (m, 4H), 1.86 - 1.65 (m, 2H), 1.63 (q, <i>J</i> = 6.7 Hz, 2H), 1.55 (q, <i>J</i> = 6.8 Hz, 2H), 1.46 (dt, <i>J</i> = 11.4, 7.8 Hz, 2H), 1.38 - 1.14 (m, 12H), 0.90 (t, <i>J</i> = 8.0 Hz, 3H). <sup>13</sup> C NMR (100 MHz, MeOD) δ 72.1, 71.5, 67.1, 66.1, 62.2, 55.6, 54.1, 50.9, 33.1, 30.8, 30.7, 30.6, 30.4, 30.2, 27.3, 24.6, 24.2, 23.7, 14.5. [α] <sub>D</sub> <sup>20</sup> = - 8.6 (c = 0.17, MeOD). IR/cm <sup>-1</sup> : 3663, 3016, 1668, 1185, 1116. HRMS: calcd for [C <sub>20</sub> H <sub>41</sub> NO <sub>5</sub> +H] <sup>+</sup> 376.3057, found 376.3058 [M+H] <sup>+</sup> . |
| C248 | (2S,3R)-1-butyl-2-(hydroxymethyl)piperidin-3-ol                                         |  | 9                                                                                                                                                                                                                                                                                                                                                                                                                                                                                                                                                                                                                                                                                                                                                                                                                                                |
| C249 | (2S,3S,4R)-2-(hydroxymethyl)piperidine-3,4-diol                                         |  | 9                                                                                                                                                                                                                                                                                                                                                                                                                                                                                                                                                                                                                                                                                                                                                                                                                                                |
| C250 | (2S,3R,4S)-2-(hydroxymethyl)piperidine-3,4-diol                                         |  | 9                                                                                                                                                                                                                                                                                                                                                                                                                                                                                                                                                                                                                                                                                                                                                                                                                                                |
| C251 | (2R,3S,4R,5S)-1-(5-(((3R,5R,7R)-adamantan-1-yl)methoxy)pentyl)-2-(hydroxymethyl)piperid |  | 3                                                                                                                                                                                                                                                                                                                                                                                                                                                                                                                                                                                                                                                                                                                                                                                                                                                |

|      |                                                                                                                                                       |  |                                                                                                                                                                                                                                                                                                                                                                                                                                                                                                                                                                                                                                                                                                                                                                                 |
|------|-------------------------------------------------------------------------------------------------------------------------------------------------------|--|---------------------------------------------------------------------------------------------------------------------------------------------------------------------------------------------------------------------------------------------------------------------------------------------------------------------------------------------------------------------------------------------------------------------------------------------------------------------------------------------------------------------------------------------------------------------------------------------------------------------------------------------------------------------------------------------------------------------------------------------------------------------------------|
|      | ine-3,4,5-triol                                                                                                                                       |  |                                                                                                                                                                                                                                                                                                                                                                                                                                                                                                                                                                                                                                                                                                                                                                                 |
| C252 | 1-((2R,3S,4S,5R,6S)-1-(5-(((3R,5R,7R)-adamantan-1-yl)methoxy)pentyl)-3,4,5-trihydroxy-6-(hydroxymethyl)piperidin-2-yl)-3,3,5,5-tetramethylhexan-1-one |  | 6                                                                                                                                                                                                                                                                                                                                                                                                                                                                                                                                                                                                                                                                                                                                                                               |
| C253 | (2R,3R,4S,5S)-1-(5-(((3R,5R,7R)-adamantan-1-yl)methoxy)pentyl)-2-(hydroxymethyl)piperidine-3,4,5-triol                                                |  | <sup>1</sup> H NMR (400 MHz, D <sub>2</sub> O) δ 4.15 (s, 1H), 4.08 - 3.95 (m, 2H), 3.95 - 3.83 (m, 2H), 3.39 (t, <i>J</i> = 6.2 Hz, 2H), 3.35 - 3.09 (m, 5H), 2.98 (s, 2H), 1.91 (s, 3H), 1.65 (m, 10H), 1.50 (s, 6H), 1.43 - 1.29 (m, 2H). <sup>13</sup> C NMR (100 MHz, D <sub>2</sub> O) δ 81.8, 71.5, 69.6, 64.8, 63.9, 60.4, 53.7, 53.0, 49.0, 39.5, 37.1, 33.9, 28.6, 28.3, 22.9, 22.4. [α] <sub>D</sub> <sup>20</sup> = +2.8 (c = 1.2, MeOH). IR/cm <sup>-1</sup> : 3333, 2901, 2847, 1674, 1454, 1204, 1134, 1080, 1053. LCMS: 0-50, <i>R</i> <sub>t</sub> 10.36 min, [M+H] <sup>+</sup> = 398.33. HRMS: calcd for [C <sub>22</sub> H <sub>39</sub> NO <sub>5</sub> +H] <sup>+</sup> 398.2901, found 398.2901 [M+H] <sup>+</sup> .                                     |
| C254 | (2R,3S,4S,5R,6S)-N-(5-(((3R,5R,7R)-adamantan-1-yl)methoxy)pentyl)-3,4,5-trihydroxy-6-(hydroxymethyl)piperidine-2-carboxamide                          |  | 6                                                                                                                                                                                                                                                                                                                                                                                                                                                                                                                                                                                                                                                                                                                                                                               |
| C255 | (2S,3R,4S,5S)-1-(5-(((3S,5S,7S)-adamantan-1-yl)methoxy)pentyl)-2-(hydroxymethyl)piperidine-3,4,5-triol                                                |  | <sup>1</sup> H NMR (400 MHz, D <sub>2</sub> O) δ 4.25 (s, 1H), 4.21 (s, 1H), 3.98 (m, 2H), 3.82 (s, 1H), 3.52 (d, <i>J</i> = 11.6 Hz, 1H), 3.41 (m, 3H), 3.35 (d, <i>J</i> = 13.2 Hz, 1H), 3.28 (m, 2H), 2.99 (s, 2H), 1.91 (s, 3H), 1.81 - 1.52 (m, 10H), 1.49 (s, 6H), 1.36 (m, 2H). <sup>13</sup> C NMR (100 MHz, D <sub>2</sub> O) δ 81.7, 71.4, 70.0, 66.9, 66.8, 64.7, 59.4, 55.5, 53.2, 39.3, 36.9, 33.7, 28.3, 28.1, 22.7, 21.8. [α] <sub>D</sub> <sup>20</sup> = 12.5 (c = 0.6, MeOH). IR/cm <sup>-1</sup> : 3368, 2901, 2847, 1674, 1539, 1184, 1130, 1069. LCMS: 10-50, <i>R</i> <sub>t</sub> 9.47 min, [M+H] <sup>+</sup> = 398.33. HRMS: calcd for [C <sub>22</sub> H <sub>39</sub> NO <sub>5</sub> +H] <sup>+</sup> 398.2901, found 398.2901 [M+H] <sup>+</sup> . |

|      |                                                                                                                                  |  |                                                                                                                                                                                                                                                                                                                                                                                                                                                                                                                                                                                                                                        |
|------|----------------------------------------------------------------------------------------------------------------------------------|--|----------------------------------------------------------------------------------------------------------------------------------------------------------------------------------------------------------------------------------------------------------------------------------------------------------------------------------------------------------------------------------------------------------------------------------------------------------------------------------------------------------------------------------------------------------------------------------------------------------------------------------------|
| C256 | (2R,3R,4S,5R)-1-(2-(benzyloxy)ethyl)-2-(hydroxymethyl)piperidine-3,4,5-triol                                                     |  | $^1\text{H NMR}$ (400 MHz, $\text{D}_2\text{O}$ ) $\delta$ 7.99 - 7.10 (m, 5H), 4.60 (s, 2H), 4.14 (d, $J = 7.9$ Hz, 1H), 4.12 - 4.05 (m, 1H), 4.05 - 3.94 (m, 3H), 3.91 (s, 2H), 3.67 - 3.40 (m, 4H), 3.33 (d, $J = 14.1$ Hz, 1H). $^{13}\text{C NMR}$ (100 MHz, $\text{D}_2\text{O}$ ) $\delta$ 136.7, 128.7, 128.4, 73.0, 67.9, 65.7, 63.0, 62.7, 62.1, 54.0, 52.3, 51.9. $[\alpha]_{\text{D}}^{20} = +2.5$ ( $c = 0.8$ , MeOH). IR/ $\text{cm}^{-1}$ : 3356, 1674, 1520, 1454, 1200, 1134, 1072, 1026. HRMS: calcd for $[\text{C}_{15}\text{H}_{23}\text{NO}_5 + \text{H}]^+$ 298.1649, found 298.1656 $[\text{M} + \text{H}]^+$ . |
| C257 | (2R,3S,4R,5S)-2-(hydroxymethyl)-1-nonylpiperidine-3,4,5-triol                                                                    |  | 8                                                                                                                                                                                                                                                                                                                                                                                                                                                                                                                                                                                                                                      |
| C258 | (2S,3S,4S,5R,6R)-1-butyl-3,4,5-trihydroxy-6-(hydroxymethyl)piperidine-2-carboxylic acid                                          |  | 6                                                                                                                                                                                                                                                                                                                                                                                                                                                                                                                                                                                                                                      |
| C259 | (2R,3S,4R,5S)-1-(5-([1,1'-biphenyl]-4-ylmethoxy)pentyl)-2-(hydroxymethyl)piperidine-3,4,5-triol                                  |  | 10                                                                                                                                                                                                                                                                                                                                                                                                                                                                                                                                                                                                                                     |
| C260 | (2S,3S,4S,5R,6S)-1-butyl-3,4,5-trihydroxy-6-(hydroxymethyl)piperidine-2-carboxamide                                              |  | 6                                                                                                                                                                                                                                                                                                                                                                                                                                                                                                                                                                                                                                      |
| C261 | (2S,3S,4R,5S)-1-(5-(((3S,5S,7S)-adamantan-1-yl)methoxy)pentyl)-2-(hydroxymethyl)piperidine-3,4,5-triol                           |  | 3                                                                                                                                                                                                                                                                                                                                                                                                                                                                                                                                                                                                                                      |
| C262 | (2S,3S,4S,5R,6S)-1-butyl-3,4,5-trihydroxy-6-(hydroxymethyl)piperidine-2-carboxylic acid                                          |  | 6                                                                                                                                                                                                                                                                                                                                                                                                                                                                                                                                                                                                                                      |
| C263 | (2S,3S,4S,5R,6S)-1-(5-(((3S,5S,7S)-adamantan-1-yl)methoxy)pentyl)-3,4,5-trihydroxy-6-(hydroxymethyl)piperidine-2-carboxylic acid |  | 6                                                                                                                                                                                                                                                                                                                                                                                                                                                                                                                                                                                                                                      |

|      |                                                                                                 |  |                                                                                                                                                                                                                                                                                                                                                                                                                                                                                                                                                                                                                                                                                                                                                                                                                                                                                                                                                               |
|------|-------------------------------------------------------------------------------------------------|--|---------------------------------------------------------------------------------------------------------------------------------------------------------------------------------------------------------------------------------------------------------------------------------------------------------------------------------------------------------------------------------------------------------------------------------------------------------------------------------------------------------------------------------------------------------------------------------------------------------------------------------------------------------------------------------------------------------------------------------------------------------------------------------------------------------------------------------------------------------------------------------------------------------------------------------------------------------------|
| C264 | (2R,3R,4S,5S)-1-(5-([1,1'-biphenyl]-4-ylmethoxy)pentyl)-2-(hydroxymethyl)piperidine-3,4,5-triol |  | <sup>1</sup> H NMR (400 MHz, D <sub>2</sub> O) δ 7.07 (dd, <i>J</i> = 7.5, 3.8 Hz, 4H), 6.92 (d, <i>J</i> = 8.0 Hz, 2H), 6.86 (t, <i>J</i> = 7.4 Hz, 2H), 6.78 (t, <i>J</i> = 7.2 Hz, 1H), 4.11 (s, 1H), 4.08 (s, 2HPh), 3.99 - 3.85 (m, 2H), 3.80 (dd, <i>J</i> = 10.7, 1.9 Hz, 1H), 3.69 (d, <i>J</i> = 12.0 Hz, 1H), 3.18 - 2.91 (m, 6H), 2.90 - 2.76 (m, 1H), 1.57 - 1.35 (m, 2H), 1.35 - 1.17 (m, 2H), 1.11 - 0.88 (m, 2H). <sup>13</sup> C NMR (100 MHz, D <sub>2</sub> O) δ 139.9, 139.5, 137.0, 128.6, 128.2, 127.1, 126.5, 71.8, 69.6, 69.4, 64.6, 63.7, 60.2, 53.4, 52.7, 48.8, 28.4, 22.6, 22.1. [α] <sub>D</sub> <sup>20</sup> = -3.5 (c = 1.1, MeOH). IR/cm <sup>-1</sup> : 3310, 3028, 2936, 1674, 1539, 1508, 1458, 1204, 1134, 1057. LCMS: 0-50, <i>R</i> <sub>t</sub> 9.82 min, [M+H] <sup>+</sup> = 416.20. HRMS: calcd for [C <sub>24</sub> H <sub>33</sub> NO <sub>5</sub> +H] <sup>+</sup> 416.2432, found 416.2334 [M+H] <sup>+</sup> . |
| C265 | (2S,3S,4S,5R,6S)-3,4,5-trihydroxy-6-(hydroxymethyl)-N-pentylpiperidine-2-carboxamide            |  | 6                                                                                                                                                                                                                                                                                                                                                                                                                                                                                                                                                                                                                                                                                                                                                                                                                                                                                                                                                             |
| C266 | (2R,3R,4S,5S)-1-(2-(benzyloxy)ethyl)-2-(hydroxymethyl)piperidine-3,4,5-triol                    |  | <sup>1</sup> H NMR (400 MHz, MeOD) δ 7.54 - 7.17 (m, 5H), 4.53 (s, 2H), 4.07 - 3.99 (m, 2H), 3.93 (dd, <i>J</i> = 10.6, 2.0 Hz, 1H), 3.88 - 3.78 (m, 3H), 3.75 (d, <i>J</i> = 10.4 Hz, 1H), 3.58 (d, <i>J</i> = 14.0 Hz, 1H), 3.46 (d, <i>J</i> = 14.0 Hz, 1H), 3.37 - 3.18 (m, 3H). <sup>13</sup> C NMR (100 MHz, MeOD) δ 139.9, 130.9, 130.4, 130.3, 75.7, 72.6, 67.8, 66.9, 65.9, 64.3, 56.2, 55.2, 52.6. [α] <sub>D</sub> <sup>20</sup> = +7.6 (c = 1.0, MeOH). IR/cm <sup>-1</sup> : 3333, 2909, 2886, 1674, 1454, 1420, 1200, 1134, 1080, 1045. LCMS: 0-20, <i>R</i> <sub>t</sub> 7.90 min, [M+H] <sup>+</sup> = 298.07. HRMS: calcd for [C <sub>15</sub> H <sub>23</sub> NO <sub>5</sub> +H] <sup>+</sup> 298.1649, found 298.1657 [M+H] <sup>+</sup> .                                                                                                                                                                                                |
| C267 | (2S,3S,4S,5R,6S)-1-butyl-3,4,5-trihydroxy-6-(hydroxymethyl)-N-pentylpiperidine-2-carboxamide    |  | 6                                                                                                                                                                                                                                                                                                                                                                                                                                                                                                                                                                                                                                                                                                                                                                                                                                                                                                                                                             |
| C268 | (2R,3R,4R,5S)-2-(hydroxymethyl)-1-(5-(neopentyloxy)pentyl)piperidine-3,4,5-triol                |  | <sup>1</sup> H NMR (400 MHz, MeOD) δ 4.01 (dd, <i>J</i> = 12.3, 2.0 Hz, 1H), 3.89 (dd, <i>J</i> = 12.3, 3.0 Hz, 1H), 3.62 (ddd, <i>J</i> = 10.8, 9.2, 4.9 Hz, 1H), 3.52 (t, <i>J</i> = 9.6 Hz, 1H), 3.44 (t, <i>J</i> = 6.2 Hz, 2H), 3.32 - 3.24 (m, 2H), 3.17 (td, <i>J</i> = 12.1, 11.5, 5.5                                                                                                                                                                                                                                                                                                                                                                                                                                                                                                                                                                                                                                                                |

|      |                                                                                                                                       |  |                                                                                                                                                                                                                                                                                                                                                                                                                                                                                                                                                                                                                                                                                                                                                                                                                                                                                                                                      |
|------|---------------------------------------------------------------------------------------------------------------------------------------|--|--------------------------------------------------------------------------------------------------------------------------------------------------------------------------------------------------------------------------------------------------------------------------------------------------------------------------------------------------------------------------------------------------------------------------------------------------------------------------------------------------------------------------------------------------------------------------------------------------------------------------------------------------------------------------------------------------------------------------------------------------------------------------------------------------------------------------------------------------------------------------------------------------------------------------------------|
|      |                                                                                                                                       |  | <p>Hz, 1H), 3.08 (s, 2H), 3.00 (td, <math>J = 12.7, 12.0, 5.4</math> Hz, 1H), 2.78 - 2.70 (m, 1H), 2.72 (t, <math>J = 11.4</math> Hz, 1H), 1.69 - 1.65 (m, 4H), 1.44 (ddd, <math>J = 17.2, 9.0, 5.9</math> Hz, 2H), 0.91 (s, 9H). <math>^{13}\text{C}</math> NMR (100 MHz, <math>\text{CDCl}_3</math>) <math>\delta</math> 82.5, 79.0, 72.1, 69.9, 68.8, 67.4, 56.5, 55.7, 54.0, 32.9, 30.4, 27.1, 24.8, 24.4. IR/<math>\text{cm}^{-1}</math>: 3284, 2347, 2326, 1018. LC/MS analysis: <math>R_t</math> 4.89 min (linear gradient 10-90% B), ES: = 320.3 <math>[\text{M}+\text{H}]^+</math>. HRMS: calcd for <math>[\text{C}_{16}\text{H}_{33}\text{O}_5\text{N}+\text{H}]^+</math> 320.2432 found 320.2431 <math>[\text{M}+\text{H}]^+</math>.</p>                                                                                                                                                                                  |
| C269 | (2S,3S,4S,5R,6S)-1-(5-(((3S,5S,7S)-adamantan-1-yl)methoxy)pentyl)-3,4,5-trihydroxy-6-(hydroxymethyl)-N-pentylpiperidine-2-carboxamide |  | 6                                                                                                                                                                                                                                                                                                                                                                                                                                                                                                                                                                                                                                                                                                                                                                                                                                                                                                                                    |
| C270 | (2S,3R,4R,5S)-1-(5-(2-((3S,5S,7S)-adamantan-1-yl)ethoxy)pentyl)-2-(hydroxymethyl)piperidine-3,4,5-triol                               |  | 3                                                                                                                                                                                                                                                                                                                                                                                                                                                                                                                                                                                                                                                                                                                                                                                                                                                                                                                                    |
| C271 | (2R,3S,4S,5S)-2-(hydroxymethyl)-1-(5-(nonyloxy)pentyl)piperidine-3,4,5-triol                                                          |  | <p><math>^1\text{H}</math> NMR (600 MHz, MeOD) <math>\delta</math> 4.22 - 4.06 (m, 1H), 4.06 - 3.96 (m, 1H), 3.97 - 3.88 (m, 2H), 3.85 (dd, <math>J = 4.6, 2.8</math> Hz, 1H), 3.46 - 3.42 (m, 5 H), 3.22 - 3.13 (m, 2H), 3.13 - 3.03 (m, 2H), 1.86 - 1.67 (m, 2H), 1.55 (q, <math>J = 7.5</math> Hz, 2H), 1.55 (q, <math>J = 7.5</math> Hz, 2H), 1.43 (q, <math>J = 7.5</math> Hz, 2H), 1.38 - 1.22 (m, 12H), 0.90 (t, <math>J = 7.0</math> Hz, 3H). <math>^{13}\text{C}</math> NMR (150 MHz, MeOD) <math>\delta</math> 72.1, 72.1, 71.5, 70.6, 64.8, 61.7, 61.6, 54.9, 51.5, 33.1, 30.8, 30.8, 30.7, 30.6, 30.4, 30.3, 27.3, 24.7, 23.8, 14.5. <math>[\alpha]_D^{20} = -35.8</math> (<math>c = 0.06</math>, MeOD). IR/<math>\text{cm}^{-1}</math>: 3666 - 2994, 1672, 1201, 1127. HRMS: calcd for <math>[\text{C}_{20}\text{H}_{41}\text{NO}_5+\text{H}]^+</math> 376.3057, found 376.3059 <math>[\text{M}+\text{H}]^+</math>.</p> |
| C272 | (2S,3R,4R,5S)-2-(hydroxymethyl)-1-(5-(nonyloxy)pentyl)piperidine-3,4,5-triol                                                          |  | 8                                                                                                                                                                                                                                                                                                                                                                                                                                                                                                                                                                                                                                                                                                                                                                                                                                                                                                                                    |
| C273 | (2S,3R,4R,5S)-1-(2-hydroxyethyl)-2-(hydroxymethyl)piperidine-3,4,5-triol                                                              |  | 14                                                                                                                                                                                                                                                                                                                                                                                                                                                                                                                                                                                                                                                                                                                                                                                                                                                                                                                                   |

|      |                                                                                  |  |                                                                                                                                                                                                                                                                                                                                                                                                                                                                                                                                                                                                                                                                                          |
|------|----------------------------------------------------------------------------------|--|------------------------------------------------------------------------------------------------------------------------------------------------------------------------------------------------------------------------------------------------------------------------------------------------------------------------------------------------------------------------------------------------------------------------------------------------------------------------------------------------------------------------------------------------------------------------------------------------------------------------------------------------------------------------------------------|
| C274 | (2S,3R,4R,5S)-2-(hydroxymethyl)-1-(5-(octyloxy)pentyl)piperidine-3,4,5-triol     |  | 8                                                                                                                                                                                                                                                                                                                                                                                                                                                                                                                                                                                                                                                                                        |
| C275 | (2R,3R,4R,5R)-1-butyl-2-(hydroxymethyl)piperidine-3,4,5-triol                    |  | 15                                                                                                                                                                                                                                                                                                                                                                                                                                                                                                                                                                                                                                                                                       |
| C276 | (2R,3R,4R,5S)-1-(5-(heptyloxy)pentyl)-2-(hydroxymethyl)piperidine-3,4,5-triol    |  | 8                                                                                                                                                                                                                                                                                                                                                                                                                                                                                                                                                                                                                                                                                        |
| C277 | (2R,3R,4R,5R)-2-(hydroxymethyl)-1-(5-(neopentyloxy)pentyl)piperidine-3,4,5-triol |  | <sup>1</sup> H NMR (400 MHz, MeOD) δ 4.16 - 4.02 (m, 2H), 4.01 - 3.85 (m, 2H), 3.59 - 3.50 (m, 1H), 3.45 (t, <i>J</i> = 6.2 Hz, 2H), 3.44 - 3.43 (m, 1H), 3.32 - 3.28 (m, 3H), 3.29 (s, 2H), 3.05 - 2.96 (m, 1H), 1.81 - 1.74 (m, 2H), 1.65 (q, <i>J</i> = 8.2 Hz, 2H), 1.47 (q, <i>J</i> = 8.2 Hz, 2H), 0.90 (s, 9 H). <sup>13</sup> C NMR (100 MHz, MeOD) δ 82.5, 74.3, 72.0, 67.8, 67.2, 67.0, 56.1, 54.5, 32.9, 30.2, 27.1, 24.6. [α] <sub>D</sub> <sup>20</sup> = -21.2 (c = 0.15, MeOD). IR/cm <sup>-1</sup> : 3634, 2956, 1669, 1172, 1204, 1113. HRMS: calcd for [C <sub>16</sub> H <sub>33</sub> NO <sub>5</sub> +H] <sup>+</sup> 320.2431, found 320.2429 [M+H] <sup>+</sup> . |
| C278 | (2S,3R,4R,5S)-2-(hydroxymethyl)-1-(5-(pentyloxy)pentyl)piperidine-3,4,5-triol    |  | 8                                                                                                                                                                                                                                                                                                                                                                                                                                                                                                                                                                                                                                                                                        |
| C279 | (2R,3R,4R,5R)-2-(hydroxymethyl)-1-(5-(nonyloxy)pentyl)piperidine-3,4,5-triol     |  | <sup>1</sup> H NMR (400 MHz, MeOD) δ 4.15 - 4.03 (m, 2H), 4.02 - 3.82 (m, 2H), 3.59 - 3.49 (m, 1H), 3.44 (dd, <i>J</i> = 12.8, 3.8 Hz, 1H), 3.34 - 3.32 (m, 3H), 3.03 - 3.0 (m, 1H), 1.83 - 1.60 (m, 2H), 1.54 - 1.13 (m, 12H), 0.90 (t, <i>J</i> = 8.2 Hz, 3H). <sup>13</sup> C NMR (100 MHz, MeOD) δ 74.2, 67.8, 67.2, 67.0, 56.0, 54.6, 33.0, 30.5, 30.3, 30.2, 27.6, 23.7. [α] <sub>D</sub> <sup>20</sup> = -20.8 (c = 0.17, MeOD). IR/cm <sup>-1</sup> : 3560, 2924, 1669, 1207, 1175, 1127. HRMS: calcd for [C <sub>15</sub> H <sub>31</sub> NO <sub>4</sub> +H] <sup>+</sup> 290.2326, found 290.2328 [M+H] <sup>+</sup> .                                                        |
| C280 | (2R,3R,4S,5S)-2-(hydroxymethyl)-1-(5-(neopentyloxy)pentyl)piperidine-3,4,5-triol |  | <sup>1</sup> H NMR (400 MHz, MeOD) δ 4.14 - 4.01 (m, 2H), 3.92 (dd, <i>J</i> = 12.5, 3.1 Hz, 1H), 3.87 (d, <i>J</i> = 2.4 Hz, 1H), 3.82 - 3.75 (m, 1H), 3.45 (t, <i>J</i> = 6.1 Hz, 2H), 3.33 - 3.31 (m, 1H), 3.28 - 3.13 (m, 4H), 3.08 (s,                                                                                                                                                                                                                                                                                                                                                                                                                                              |

|      |                                                                               |                                                                                     |                                                                                                                                                                                                                                                                                                                                                                                                                                                          |
|------|-------------------------------------------------------------------------------|-------------------------------------------------------------------------------------|----------------------------------------------------------------------------------------------------------------------------------------------------------------------------------------------------------------------------------------------------------------------------------------------------------------------------------------------------------------------------------------------------------------------------------------------------------|
|      |                                                                               |                                                                                     | 2H), 1.90 - 1.70 (m, 2H), 1.70 - 1.59 (m, 2H), 1.50 - 1.48 (m, 2H), 0.91 (s, 9 H). <sup>13</sup> C NMR (100 MHz, MeOD) δ 82.5, 72.0, 71.4, 66.6, 65.7, 62.2, 55.0, 54.0, 50.7, 32.9, 30.2, 27.1, 24.6, 24.1. [α] <sub>D</sub> <sup>20</sup> = -3.5 (c = 0.23, MeOD). IR/cm <sup>-1</sup> : 3692, 2995, 1671, 1207, 1128. HRMS: calcd for [C <sub>16</sub> H <sub>33</sub> NO <sub>5</sub> +H] <sup>+</sup> 320.2431, found 320.2429 [M+H] <sup>+</sup> . |
| C281 | (2R,3R,4R,5S)-2-(hydroxymethyl)-1-(5-(pentyloxy)pentyl)piperidine-3,4,5-triol | 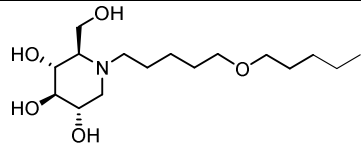   | 8                                                                                                                                                                                                                                                                                                                                                                                                                                                        |
| C282 | (2S,3R,4S,5R)-2-methylpiperidine-3,4,5-triol                                  |    | 16                                                                                                                                                                                                                                                                                                                                                                                                                                                       |
| C283 | (2R,3R,4R,5S)-1-(5-butoxypentyl)-2-(hydroxymethyl)piperidine-3,4,5-triol      |    | 8                                                                                                                                                                                                                                                                                                                                                                                                                                                        |
| C284 | (2R,3R,4S,5R)-2-methylpiperidine-3,4,5-triol                                  |   | 16                                                                                                                                                                                                                                                                                                                                                                                                                                                       |
| C285 | (2S,3S,4R,5S)-2-methylpiperidine-3,4,5-triol                                  |  | 16                                                                                                                                                                                                                                                                                                                                                                                                                                                       |
| C286 | (2R,3R,4R,5S)-2-(hydroxymethyl)-1-octylpiperidine-3,4,5-triol                 |  | 8                                                                                                                                                                                                                                                                                                                                                                                                                                                        |
| C287 | (2S,3S,4R,5R)-2-methylpiperidine-3,4,5-triol                                  |  | 16                                                                                                                                                                                                                                                                                                                                                                                                                                                       |
| C288 | (2S,3R,4R,5S)-2-(hydroxymethyl)-1-octylpiperidine-3,4,5-triol                 |  | 8                                                                                                                                                                                                                                                                                                                                                                                                                                                        |
| C289 | (2R,3R,4S,5S)-2-methylpiperidine-3,4,5-triol                                  |  | 16                                                                                                                                                                                                                                                                                                                                                                                                                                                       |



|      |                                                                                                             |  |    |
|------|-------------------------------------------------------------------------------------------------------------|--|----|
| C290 | (2R,3R,4R,5S)-1-heptyl-2-(hydroxymethyl)piperidine-3,4,5-triol                                              |  | 8  |
| C291 | (2S,3R,4S,5R)-2-methylpiperidine-3,4,5-triol                                                                |  | 16 |
| C292 | (2R,3S,4R,5S)-2-methylpiperidine-3,4,5-triol                                                                |  | 16 |
| C293 | (2R,3R,4R,5S)-1-hexyl-2-(hydroxymethyl)piperidine-3,4,5-triol                                               |  | 8  |
| C294 | (2S,3R,4S,5S)-2-methylpiperidine-3,4,5-triol                                                                |  | 16 |
| C295 | (2S,3R,4R,5S)-1-hexyl-2-(hydroxymethyl)piperidine-3,4,5-triol                                               |  | 8  |
| C296 | (2R,3S,4R,5R)-2-methylpiperidine-3,4,5-triol                                                                |  | 16 |
| C297 | (2R,3R,4R,5S)-2-(hydroxymethyl)-1-pentylpiperidine-3,4,5-triol                                              |  | 8  |
| C298 | (2S,3R,4R,5S)-2-(hydroxymethyl)-1-pentylpiperidine-3,4,5-triol                                              |  | 8  |
| C299 | (2R,3S,4S,5R)-2-(hydroxymethyl)piperidine-3,4,5-triol                                                       |  | 4  |
| C300 | (2S,3R)-2-(hydroxymethyl)-1,2,3,6-tetrahydropyridin-3-ol                                                    |  | 9  |
| C301 | (2R,3R,4R,5S)-2-(hydroxymethyl)-1-(5-((4'-methyl-[1,1'-biphenyl]-4-yl)methoxy)pentyl)piperidine-3,4,5-triol |  | 10 |

|      |                                                                                                                              |  |    |
|------|------------------------------------------------------------------------------------------------------------------------------|--|----|
| C302 | (2R,3R,4R,5S)-2-(hydroxymethyl)-1-(5-((3'-methyl-[1,1'-biphenyl]-4-yl)methoxy)pentyl)piperidine-3,4,5-triol                  |  | 10 |
| C303 | (2R,3R,4R,5S)-1-(5-((4-(benzo[d][1,3]dioxol-5-yl)benzyl)oxy)pentyl)-2-(hydroxymethyl)piperidine-3,4,5-triol                  |  | 10 |
| C304 | (2R,3R,4R,5S)-1-(5-((4-(3,4-dihydro-2H-benzo[b][1,4]dioxepin-7-yl)benzyl)oxy)pentyl)-2-(hydroxymethyl)piperidine-3,4,5-triol |  | 10 |
| C305 | (2R,3R,4R,5S)-2-(hydroxymethyl)-1-(5-((4'-methoxy-[1,1'-biphenyl]-4-yl)methoxy)pentyl)piperidine-3,4,5-triol                 |  | 10 |
| C306 | (2R,3R,4R,5S)-2-(hydroxymethyl)-1-(5-((3'-methoxy-[1,1'-biphenyl]-4-yl)methoxy)pentyl)piperidine-3,4,5-triol                 |  | 10 |
| C307 | (2R,3R,4R,5S)-2-(hydroxymethyl)-1-(5-((4'-(trifluoromethyl)-[1,1'-biphenyl]-4-yl)methoxy)pentyl)piperidine-3,4,5-triol       |  | 10 |
| C308 | (2R,3R,4R,5S)-1-(5-((3',5'-bis(trifluoromethyl)-[1,1'-biphenyl]-4-yl)methoxy)pentyl)-2-(hydroxymethyl)piperidine-3,4,5-triol |  | 10 |
| C309 | 4'-(((5-((2R,3R,4R,5S)-3,4,5-trihydroxy-2-(hydroxymethyl)piperidin-1-yl)pentyl)oxy)methyl)-[1,1'-biphenyl]-4-carbonitrile    |  | 10 |
| C310 | 4'-(((5-((2R,3R,4R,5S)-3,4,5-trihydroxy-2-(hydroxymethyl)piperidin-1-yl)pentyl)oxy)methyl)-[1,1'-biphenyl]-3-carbonitrile    |  | 10 |
| C311 | (2R,3R,4R,5S)-1-(5-((4'-fluoro-[1,1'-biphenyl]-4-yl)methoxy)pentyl)-2-(hydroxymethyl)piperidine-3,4,5-triol                  |  | 10 |

|      |                                                                                                             |  |    |
|------|-------------------------------------------------------------------------------------------------------------|--|----|
| C312 | (2R,3R,4R,5S)-1-(5-((3'-fluoro-[1,1'-biphenyl]-4-yl)methoxy)pentyl)-2-(hydroxymethyl)piperidine-3,4,5-triol |  | 10 |
| C313 | (2R,3R)-1-(5-(((3R,5R,7R)-adamantan-1-yl)methoxy)pentyl)-2-(hydroxymethyl)-1,2,3,6-tetrahydropyridin-3-ol   |  | 9  |
| C314 | (2R,3R,4R,5S)-1-(5-((4'-chloro-[1,1'-biphenyl]-4-yl)methoxy)pentyl)-2-(hydroxymethyl)piperidine-3,4,5-triol |  | 10 |
| C315 | (2S,3R,4S)-1-(5-(((3S,5S,7S)-adamantan-1-yl)methoxy)pentyl)-2-(hydroxymethyl)piperidine-3,4-diol            |  | 9  |
| C316 | (2R,3R,4R,5S)-2-(hydroxymethyl)-1-(5-((4-(pyridin-4-yl)benzyl)oxy)pentyl)piperidine-3,4,5-triol             |  | 10 |
| C317 | (2S,3S,4R)-1-butyl-2-(hydroxymethyl)piperidine-3,4-diol                                                     |  | 9  |
| C318 | (2R,3R,4R,5S)-2-(hydroxymethyl)-1-(5-((4-(pyridin-3-yl)benzyl)oxy)pentyl)piperidine-3,4,5-triol             |  | 10 |
| C319 | (2R,3R,4S)-2-(hydroxymethyl)piperidine-3,4-diol                                                             |  | 9  |
| C320 | (2R,3R,4R,5S)-2-(hydroxymethyl)-1-(5-((4-(pyrimidin-5-yl)benzyl)oxy)pentyl)piperidine-3,4,5-triol           |  | 10 |
| C321 | (2S,3R,4S)-1-butyl-2-(hydroxymethyl)piperidine-3,4-diol                                                     |  | 9  |
| C322 | (2R,3R,4R,5S)-1-(5-((4-(6-fluoropyridin-3-yl)benzyl)oxy)pentyl)-2-(hydroxymethyl)piperidine-3,4,5-triol     |  | 10 |

|      |                                                                                                                           |                                                                                     |    |
|------|---------------------------------------------------------------------------------------------------------------------------|-------------------------------------------------------------------------------------|----|
| C323 | (2R,3S,4S)-2-(hydroxymethyl)piperidine-3,4-diol                                                                           | 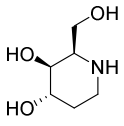   | 9  |
| C324 | (2R,3R,4R,5S)-1-(5-((4-(2,3-dihydrobenzo[b][1,4]dioxin-6-yl)benzyl)oxy)pentyl)-2-(hydroxymethyl)piperidine-3,4,5-triol    |    | 10 |
| C325 | (2R,3S,4R)-1-(5-(((3R,5R,7R)-adamantan-1-yl)methoxy)pentyl)-2-(hydroxymethyl)piperidine-3,4-diol                          |    | 9  |
| C326 | (2R,3R,4R,5S)-2-(hydroxymethyl)-1-(5-((2'-methyl-[1,1'-biphenyl]-4-yl)methoxy)pentyl)piperidine-3,4,5-triol               |    | 10 |
| C327 | (2S,3S,4S)-1-butyl-2-(hydroxymethyl)piperidine-3,4-diol                                                                   |   | 9  |
| C328 | 4'-((5-((2R,3R,4R,5S)-3,4,5-trihydroxy-2-(hydroxymethyl)piperidine-1-yl)pentyl)oxy)methyl)-[1,1'-biphenyl]-2-carbonitrile |  | 10 |
| C329 | (2R,3R)-1-butyl-2-(hydroxymethyl)piperidine-3-ol                                                                          |  | 9  |
| C330 | (2R,3R,4R,5S)-1-(5-((2'-fluoro-[1,1'-biphenyl]-4-yl)methoxy)pentyl)-2-(hydroxymethyl)piperidine-3,4,5-triol               |  | 10 |
| C331 | (2R,3R)-2-(hydroxymethyl)-1,2,3,6-tetrahydropyridin-3-ol                                                                  |  | 9  |
| C332 | (2R,3R,4R,5S)-2-(hydroxymethyl)-1-(5-((2'-methoxy-[1,1'-biphenyl]-4-yl)methoxy)pentyl)piperidine-3,4,5-triol              |  | 10 |

|      |                                                                                                         |  |    |
|------|---------------------------------------------------------------------------------------------------------|--|----|
| C333 | (2R,3S)-2-(hydroxymethyl)piperidin-3-ol                                                                 |  | 9  |
| C334 | (2R,3R,4R,5S)-1-(5-((4-(2-fluoropyridin-4-yl)benzyl)oxy)pentyl)-2-(hydroxymethyl)piperidine-3,4,5-triol |  | 10 |
| C335 | (2S,3S,4S)-2-(hydroxymethyl)piperidine-3,4-diol                                                         |  | 9  |
| C336 | (2R,3R,4R,5S)-2-(hydroxymethyl)-1-(5-(5-phenylpyridin-2-yl)methoxy)pentyl)piperidine-3,4,5-triol        |  | 10 |
| C337 | (2S,3S)-2-(hydroxymethyl)-1,2,3,6-tetrahydropyridin-3-ol                                                |  | 9  |
| C338 | (2R,3R)-1-(5-(((3R,5R,7R)-adamantan-1-yl)methoxy)pentyl)-2-(hydroxymethyl)piperidin-3-ol                |  | 9  |
| C339 | (2R,3R,4R,5S)-1-(5-([1,1'-biphenyl]-2-ylmethoxy)pentyl)-2-(hydroxymethyl)piperidine-3,4,5-triol         |  | 10 |
| C340 | (2R,3S)-2-(hydroxymethyl)-1,2,3,6-tetrahydropyridin-3-ol                                                |  | 9  |
| C341 | (2R,3R,4R,5S)-1-(5-([1,1'-biphenyl]-3-ylmethoxy)pentyl)-2-(hydroxymethyl)piperidine-3,4,5-triol         |  | 10 |
| C342 | (2S,3S,4R)-1-(5-(((3S,5S,7S)-adamantan-1-yl)methoxy)pentyl)-2-(hydroxymethyl)piperidine-3,4-diol        |  | 9  |
| C343 | (2R,3R,4R,5S)-1-(5-([1,1'-biphenyl]-4-ylmethoxy)pentyl)-2-(hydroxymethyl)piperidine-3,4,5-triol         |  | 10 |

|      |                                                                                                              |  |    |
|------|--------------------------------------------------------------------------------------------------------------|--|----|
| C344 | (2S,3S)-2-(hydroxymethyl)piperidine-3-ol                                                                     |  | 9  |
| C345 | (2R,3R,4R,5S)-1-(5-((R)-1-([1,1'-biphenyl]-4-yl)ethoxy)pentyl)-2-(hydroxymethyl)piperidine-3,4,5-triol       |  | 10 |
| C346 | (2S,3R)-1-(5-(((3S,5S,7S)-adamantan-1-yl)methoxy)pentyl)-2-(hydroxymethyl)piperidine-3-ol                    |  | 9  |
| C347 | (2R,3R,4R,5S)-1-(5-((S)-1-([1,1'-biphenyl]-4-yl)ethoxy)pentyl)-2-(hydroxymethyl)piperidine-3,4,5-triol       |  | 10 |
| C348 | (2R,3R,4R,5S)-1-(5-((4'-bromo-[1,1'-biphenyl]-4-yl)methoxy)pentyl)-2-(hydroxymethyl)piperidine-3,4,5-triol   |  | 10 |
| C349 | (2R,3R,4R,5S)-1-(5-([1,1'-biphenyl]-4-ylmethoxy)-4,4-difluoropentyl)-2-(hydroxymethyl)piperidine-3,4,5-triol |  | 10 |
| C350 | (2R,3R,4R,5S)-1-(5-([1,1'-biphenyl]-4-ylmethoxy)-2,2-difluoropentyl)-2-(hydroxymethyl)piperidine-3,4,5-triol |  | 10 |
| C351 | (2S,3R,4R,5S)-1-(5-([1,1'-biphenyl]-2-ylmethoxy)pentyl)-2-(hydroxymethyl)piperidine-3,4,5-triol              |  | 10 |
| C352 | (2S,3R,4R,5S)-1-(5-([1,1'-biphenyl]-3-ylmethoxy)pentyl)-2-(hydroxymethyl)piperidine-3,4,5-triol              |  | 10 |
| C353 | (2S,3R,4R,5S)-1-(5-([1,1'-biphenyl]-4-ylmethoxy)pentyl)-2-(hydroxymethyl)piperidine-3,4,5-triol              |  | 10 |

|      |                                                                                                              |  |    |
|------|--------------------------------------------------------------------------------------------------------------|--|----|
| C354 | (2S,3R,4R,5S)-1-(5-((R)-1-([1,1'-biphenyl]-4-yl)ethoxy)pentyl)-2-(hydroxymethyl)piperidine-3,4,5-triol       |  | 10 |
| C355 | (2S,3R,4R,5S)-1-(5-((S)-1-([1,1'-biphenyl]-4-yl)ethoxy)pentyl)-2-(hydroxymethyl)piperidine-3,4,5-triol       |  | 10 |
| C356 | (2S,3R,4R,5S)-1-(5-((4-bromobenzyl)oxy)pentyl)-2-(hydroxymethyl)piperidine-3,4,5-triol                       |  | 10 |
| C357 | (2S,3R,4R,5S)-1-(5-([1,1'-biphenyl]-4-ylmethoxy)-4,4-difluoropentyl)-2-(hydroxymethyl)piperidine-3,4,5-triol |  | 10 |
| C358 | (2S,3R,4R,5S)-1-(5-([1,1'-biphenyl]-4-ylmethoxy)-2,2-difluoropentyl)-2-(hydroxymethyl)piperidine-3,4,5-triol |  | 10 |

## S5 Additional Biochemical Data for ABP 4

### *Prolonged Imaging Experiment*

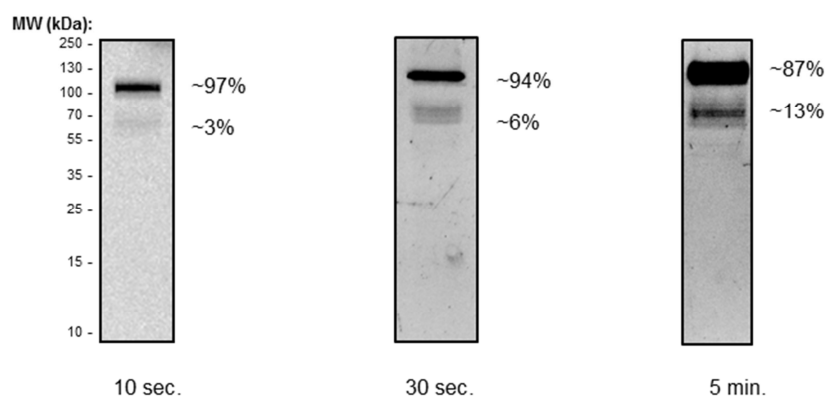

**Figure S1.** Prolonged fluorescent scanning showing ca. 87% of signal originates from probe bound to GBA2 (102kDa) and approximately 13% from probe bound to GBA1 (60kDa). Intensities of the bands were quantified using Image Lab v4.1.

### *Potency and Selectivity of ABP 4*

Potency ( $IC_{50}$ ) of ABP 4 on GCS was determined as described by method described in the experimental section. The inhibition constants ( $K_i$ ) of ABP 4 were determined by the method described in Witte et al.<sup>17</sup> Values in table S2 are given in  $\mu$ M.

**Table S2: Potency and selectivity of the probe on GCS, GBA1, GBA2 and GBA3**

| GCS <sup>a</sup> | GBA1 <sup>b</sup> | GBA2 <sup>b</sup> | GBA3 <sup>b</sup> | Ratio GCS/GBA2 | Ratio GBA1/GBA2 | Ratio GBA3/GBA2 |
|------------------|-------------------|-------------------|-------------------|----------------|-----------------|-----------------|
| >200             | 0.249             | 0.008             | 0.054             | >25000         | 31              | 7               |

(a) *in situ* (b) *in vitro*



## S6 FluoPol-ABPP - pH Experiments on Established Competitors

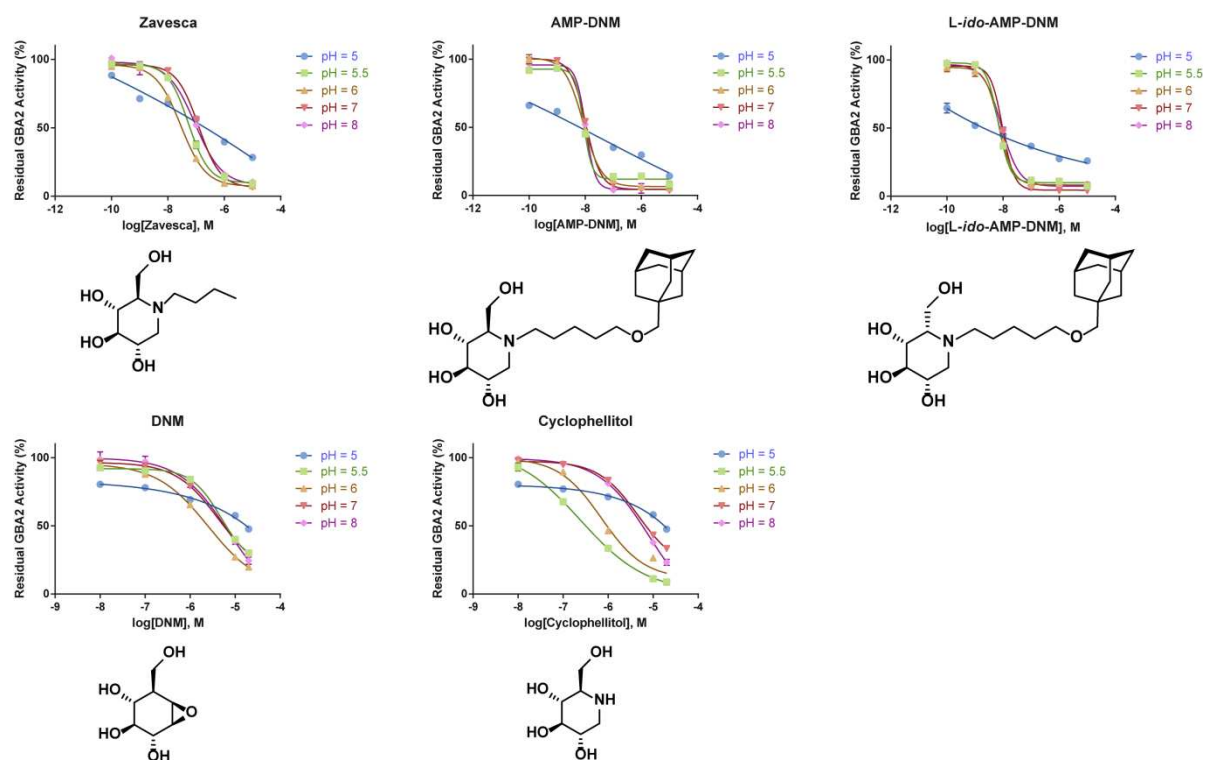

**Figure S2.** Inhibition by established inhibitors (1, 2, 6, 7 and 8) on GBA2 determined via FluoPol-ABPP. Curves represent experiments at a different pH, error bars represent standard error of the mean (SEM).

**Table S3: Inhibition values of established inhibitors on GBA2 determined via FluoPol-ABPP**

| pH  | Zavesca (1)   | AMP-DNM (2)     | L-ido-AMP-DNM (6) | DNM (7)      | Cyclophellitol (8) |
|-----|---------------|-----------------|-------------------|--------------|--------------------|
| 5.0 | 0.201 ± 0.006 | 0.0061 ± 0.0008 | 0.0027 ± 0.006    | 23.62 ± 0.76 | 26.70 ± 2.88       |
| 5.5 | 0.065 ± 0.003 | 0.0098 ± 0.0004 | 0.0072 ± 0.003    | 6.52 ± 0.40  | 0.35 ± 0.04        |
| 6.0 | 0.033 ± 0.002 | 0.0102 ± 0.0008 | 0.0072 ± 0.002    | 2.37 ± 0.08  | 1.16 ± 0.08        |
| 7.0 | 0.135 ± 0.001 | 0.0118 ± 0.0001 | 0.0095 ± 0.001    | 5.86 ± 0.24  | 7.48 ± 0.23        |
| 8.0 | 0.116 ± 0.001 | 0.106 ± 0.0004  | 0.0095 ± 0.001    | 5.54 ± 0.56  | 5.35 ± 0.01        |

## S7 FluoPol-ABPP Screen of the Iminosugar Library - Categorized based on Configuration

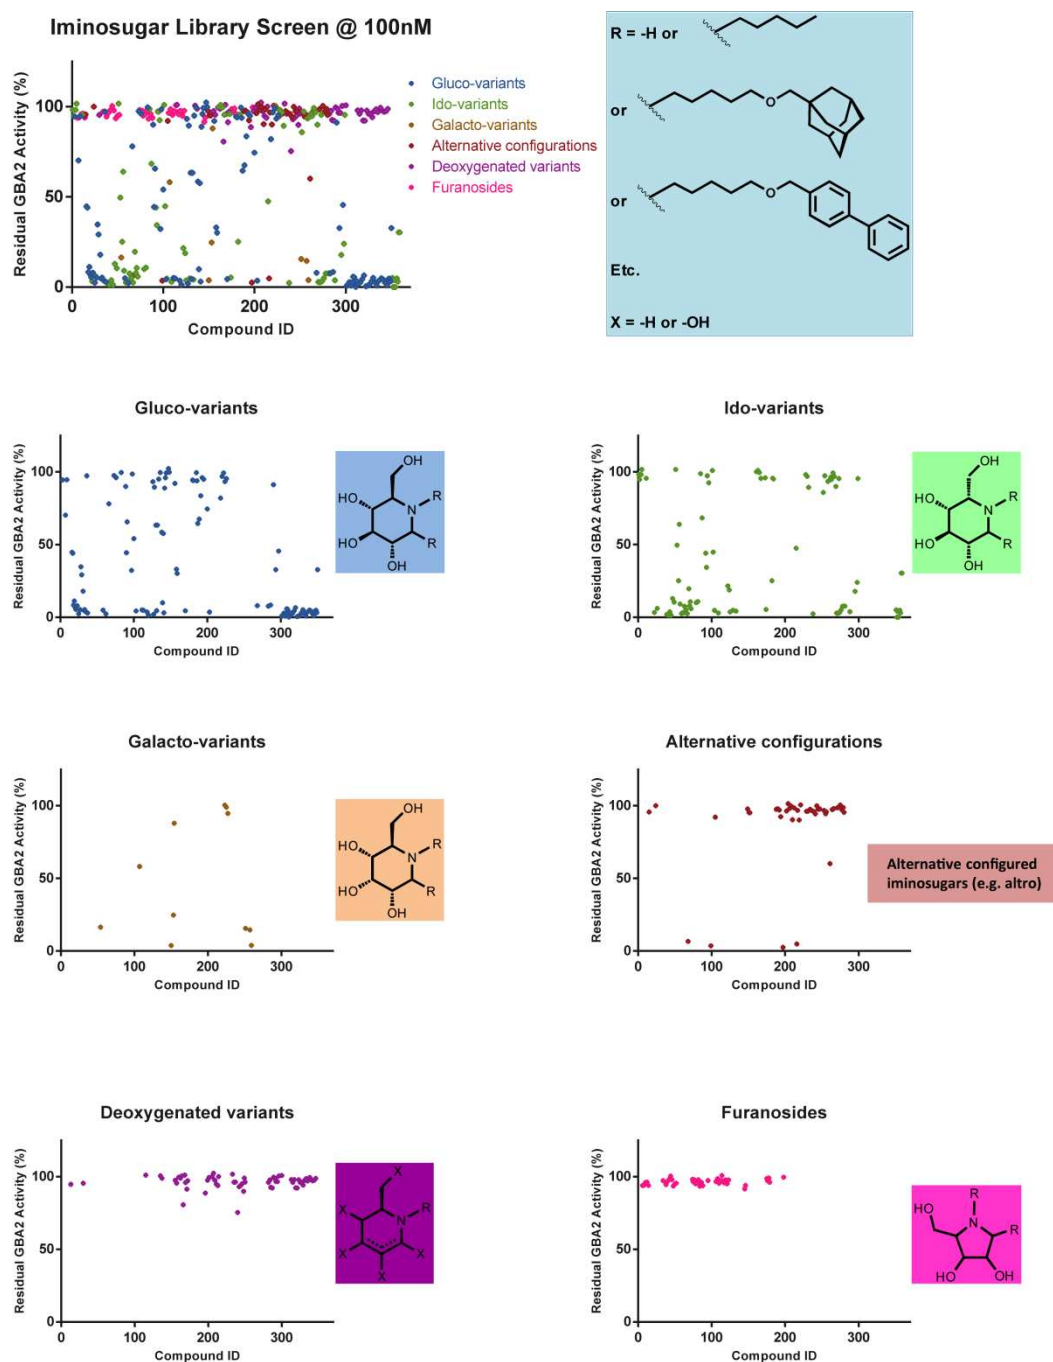

**Figure S3.** FluoPol-ABPP screen of the iminosugar library. Compounds are categorized based on its sugar configuration (*gluco*, *ido*, *galacto* and others are classified as ‘alternative configurations’), deoxygenated variants and furanosides.

## S8 Potency and Selectivity Assessment for D-gluco- and L-ido-deoxynojirimycins

The potency of D-gluco- and L-ido-deoxynojirimycins on GCS, GBA1 and GBA2 were determined by the method described in the manuscript. The data set displayed here is composed of published IC<sub>50</sub>-values which were confirmed in our experiments and for unknowns experimentally determined. Calculated ratios GCS/GBA2 and GBA1/GBA2 are colored in green. A stronger shade of green stands for a higher ratio and thus selectivity.

### Iminosugar Library

Table S4: Inhibition values of iminosugar library compounds on GCS, GBA1 and GBA2

| Entry: | GBA2 Inhibition (%) FluoPol | IC <sub>50</sub> on GCS (in situ) in $\mu$ M | IC <sub>50</sub> on GBA1 (in vitro) in $\mu$ M | IC <sub>50</sub> on GBA2 (in vitro) in $\mu$ M | Ratio GCS/GBA2 | Ratio GBA1/GBA2 |
|--------|-----------------------------|----------------------------------------------|------------------------------------------------|------------------------------------------------|----------------|-----------------|
| C16    | 44.7                        | 2.9                                          | 2.17                                           | 0.025                                          | 116            | 87              |
| C17    | 44.1                        | 9.53                                         | 500                                            | 0.400                                          | 24             | 1250            |
| C18    | 8.4                         | 1                                            | 0.50                                           | 0.009                                          | 111            | 56              |
| C19    | 11.2                        | 4                                            | 30                                             | 0.060                                          | 67             | 500             |
| C20    | 6.9                         | 2                                            | 705                                            | 0.040                                          | 50             | 17625           |
| C21    | 5.5                         | 1                                            | 205                                            | 0.008                                          | 125            | 25625           |
| C22    | 3.3                         | 1                                            | 15                                             | 0.020                                          | 50             | 750             |
| C23    | 8.0                         | 0.3                                          | 1.75                                           | 0.015                                          | 20             | 117             |
| C25    | 2.4                         | 0.2                                          | 0.50                                           | 0.010                                          | 20             | 50              |
| C26    | 6.1                         | 2.77                                         | 100                                            | 0.007                                          | 413            | 14925           |
| C27    | 5.3                         | 0.1                                          | 0.50                                           | 0.040                                          | 3              | 13              |
| C28    | 34.7                        | 50                                           | 0.35                                           | 0.068                                          | 735            | 5               |
| C29    | 29.2                        | 20                                           | 80                                             | 0.110                                          | 182            | 727             |
| C31    | 18.0                        | 20                                           | 18.5                                           | 0.045                                          | 444            | 411             |
| C32    | 4.7                         | 40.03                                        | 0.06                                           | 0.010                                          | 4003           | 6               |
| C33    | 5.3                         | 4                                            | 4                                              | 0.020                                          | 200            | 200             |
| C35    | 3.6                         | 0.025                                        | 0.25                                           | 0.00008                                        | 313            | 3125            |
| C37    | 3.0                         | 0.025                                        | 0.20                                           | 0.00008                                        | 313            | 2500            |
| C39    | 1.9                         | 0.003                                        | 5                                              | 0.0001                                         | 30             | 50000           |
| C41    | 1.5                         | 0.003                                        | 6                                              | 0.0001                                         | 30             | 60000           |
| C43    | 3.8                         | 0.005                                        | 8                                              | 0.0004                                         | 13             | 20000           |
| C45    | 1.4                         | 0.0025                                       | 6                                              | 0.0006                                         | 4              | 10000           |
| C54    | 16.4                        | 1.94                                         | 100                                            | 0.0027                                         | 719            | 37037           |
| C55    | 25.2                        | 15                                           | 1000                                           | 0.250                                          | 60             | 4000            |
| C57    | 9.1                         | 2                                            | 1000                                           | 1.000                                          | 2              | 1000            |
| C58    | 4.9                         | 0.003                                        | 1                                              | 0.001                                          | 3              | 1000            |
| C59    | 2.5                         | 0.15                                         | 100                                            | 0.015                                          | 10             | 6667            |
| C60    | 3.1                         | 0.003                                        | 50                                             | 0.001                                          | 3              | 50000           |
| C61    | 3.1                         | 0.1                                          | 95                                             | 0.025                                          | 4              | 3800            |
| C62    | 2.3                         | 0.05                                         | 0.40                                           | 0.002                                          | 25             | 200             |
| C63    | 7.5                         | 0.05                                         | 40                                             | 0.015                                          | 3              | 2667            |
| C64    | 3.2                         | 0.008                                        | 20                                             | 0.003                                          | 3              | 6667            |
| C65    | 5.3                         | 0.05                                         | 15                                             | 0.015                                          | 3              | 1000            |

|      |      |       |       |         |      |       |
|------|------|-------|-------|---------|------|-------|
| C67  | 2.5  | 0.05  | 12    | 0.045   | 1    | 267   |
| C68  | 6.6  | 10    | 5     | 0.150   | 67   | 33    |
| C69  | 19.6 | 40    | 1000  | 0.140   | 286  | 7143  |
| C70  | 7.9  | 0.4   | 40    | 0.015   | 27   | 2667  |
| C71  | 10.7 | 4     | 700   | 0.040   | 100  | 17500 |
| C72  | 35.0 | 21.4  | 35.95 | 0.031   | 690  | 1160  |
| C73  | 5.9  | 4     | 25    | 0.020   | 200  | 1250  |
| C79  | 10.1 | 0.75  | 0.30  | 0.001   | 750  | 300   |
| C81  | 10.8 | 0.2   | 10    | 0.003   | 67   | 3333  |
| C90  | 44.4 | 0.5   | 1.5   | 0.004   | 125  | 375   |
| C92  | 44.1 | 2.5   | 50    | 0.100   | 25   | 500   |
| C93  | 34.3 | 20    | 1000  | 1.000   | 20   | 1000  |
| C97  | 32.2 | 50    | 0.07  | 0.300   | 167  | 0     |
| C99  | 3.6  | 20    | 0.34  | 0.010   | 2000 | 34    |
| C102 | 44.8 | 1.9   | 100   | 0.0058  | 328  | 17241 |
| C103 | 4.3  | 4     | 1.5   | 0.007   | 571  | 214   |
| C104 | 4.7  | 2     | 50    | 0.010   | 200  | 5000  |
| C109 | 3.0  | 0.43  | 11.97 | 0.0015  | 287  | 7980  |
| C111 | 5.0  | 0.39  | 0.84  | 0.001   | 390  | 840   |
| C113 | 4.8  | 0.2   | 0.1   | 0.002   | 100  | 50    |
| C118 | 3.6  | 0.025 | 0.2   | 0.00012 | 208  | 1667  |
| C120 | 1.4  | 0.025 | 0.1   | 0.00008 | 313  | 1250  |
| C122 | 3.7  | 0.08  | 10    | 0.002   | 40   | 5000  |
| C127 | 2.0  | 0.5   | 1.5   | 0.004   | 125  | 375   |
| C129 | 4.8  | 0.07  | 60    | 0.006   | 12   | 10000 |
| C131 | 4.5  | 35.2  | 0.5   | 0.005   | 7040 | 100   |
| C133 | 4.2  | 14.35 | 12    | 0.008   | 1794 | 1500  |
| C139 | 9.9  | 0.75  | 0.3   | 0.001   | 750  | 300   |
| C141 | 3.1  | 0.3   | 0.1   | 0.002   | 150  | 50    |
| C158 | 33.1 | 50    | 0.07  | 0.034   | 1471 | 2     |
| C159 | 30.2 | 10    | 0.25  | 0.020   | 500  | 13    |
| C170 | 4.4  | 5     | 0.19  | 0.005   | 1000 | 38    |
| C174 | 5.4  | 0.1   | 2     | 0.001   | 100  | 2000  |
| C182 | 25.2 | 3.88  | 1000  | 0.190   | 20   | 5263  |
| C197 | 2.6  | 40    | 0.38  | 0.008   | 5000 | 48    |
| C203 | 3.6  | 3.63  | 1.29  | 0.00415 | 875  | 311   |
| C215 | 47.6 | 12.06 | 100   | 0.0023  | 5243 | 43478 |
| C216 | 4.8  | 10    | 6     | 0.013   | 769  | 462   |
| C238 | 2.3  | 1.34  | 33.89 | 0.00058 | 2310 | 58431 |
| C268 | 8.0  | 5.05  | 6.2   | 0.00495 | 1020 | 1253  |
| C270 | 2.9  | 5     | 2     | 0.006   | 833  | 333   |
| C272 | 2.8  | 0.05  | 12    | 0.045   | 1    | 267   |
| C274 | 3.3  | 0.05  | 15    | 0.015   | 3    | 1000  |
| C276 | 4.9  | 0.3   | 1.75  | 0.015   | 20   | 117   |

|      |      |       |      |         |      |        |
|------|------|-------|------|---------|------|--------|
| C278 | 7.6  | 0.15  | 100  | 0.015   | 10   | 6667   |
| C281 | 7.7  | 2     | 705  | 0.040   | 50   | 17625  |
| C283 | 7.7  | 4     | 30   | 0.060   | 67   | 500    |
| C286 | 8.4  | 4     | 4    | 0.020   | 200  | 200    |
| C288 | 3.8  | 4     | 25   | 0.020   | 200  | 1250   |
| C293 | 32.8 | 20    | 80   | 0.110   | 182  | 727    |
| C295 | 17.9 | 40    | 1000 | 0.140   | 286  | 7143   |
| C297 | 45.6 | 20    | 500  | 0.400   | 50   | 1250   |
| C298 | 24.0 | 15    | 1000 | 0.250   | 60   | 4000   |
| C301 | 0.7  | 0.1   | 0.25 | 0.003   | 33   | 83     |
| C302 | 1.4  | 0.1   | 0.25 | 0.002   | 50   | 125    |
| C303 | 1.2  | 0.025 | 0.5  | 0.002   | 13   | 250    |
| C304 | 2.8  | 0.025 | 3    | 0.015   | 2    | 200    |
| C305 | 1.9  | 0.025 | 2.5  | 0.010   | 3    | 250    |
| C306 | 0.9  | 0.15  | 2.5  | 0.020   | 8    | 125    |
| C307 | 2.5  | 0.025 | 0.4  | 0.001   | 25   | 400    |
| C308 | 5.8  | 0.02  | 0.8  | 0.015   | 1    | 53     |
| C309 | 5.6  | 0.15  | 0.35 | 0.003   | 50   | 117    |
| C310 | 0.6  | 0.05  | 0.7  | 0.002   | 25   | 350    |
| C311 | 0.2  | 0.025 | 0.4  | 0.001   | 25   | 400    |
| C312 | 3.4  | 0.025 | 0.03 | 0.001   | 25   | 25     |
| C314 | 1.8  | 0.025 | 0.5  | 0.002   | 13   | 250    |
| C316 | 2.8  | 2     | 2    | 0.010   | 200  | 200    |
| C318 | 4.4  | 2     | 3    | 0.010   | 200  | 300    |
| C320 | 6.5  | 2     | 10   | 0.025   | 80   | 400    |
| C322 | 0.5  | 0.75  | 3    | 0.005   | 150  | 600    |
| C324 | 0.9  | 0.04  | 0.25 | 0.030   | 1    | 8      |
| C326 | 1.4  | 0.025 | 0.07 | 0.001   | 50   | 140    |
| C328 | 3.1  | 0.15  | 0.6  | 0.005   | 30   | 120    |
| C330 | 5.2  | 0.075 | 0.6  | 0.002   | 38   | 300    |
| C332 | 2.5  | 0.05  | 0.6  | 0.003   | 17   | 200    |
| C334 | 0.9  | 0.15  | 2    | 0.004   | 38   | 500    |
| C336 | 3.5  | 0.2   | 1.5  | 0.003   | 67   | 500    |
| C339 | 4.9  | 0.05  | 1.25 | 0.003   | 17   | 417    |
| C341 | 4.2  | 0.075 | 0.3  | 0.002   | 38   | 150    |
| C343 | 2.5  | 0.05  | 0.4  | 0.002   | 25   | 200    |
| C345 | 1.0  | 0.06  | 300  | 0.003   | 20   | 100000 |
| C347 | 4.6  | 0.07  | 400  | 0.003   | 23   | 133333 |
| C348 | 4.7  | 0.33  | 2.55 | 0.00004 | 7500 | 57955  |
| C349 | 3.2  | 0.06  | 0.3  | 0.001   | 60   | 300    |
| C350 | 32.8 | 1.25  | 0.13 | 0.010   | 125  | 13     |
| C351 | 5.1  | 0.025 | 15   | 0.003   | 8    | 5000   |
| C352 | 0.1  | 0.07  | 20   | 0.002   | 35   | 10000  |
| C353 | 3.9  | 0.008 | 20   | 0.003   | 3    | 6667   |

|             |      |       |      |         |    |        |
|-------------|------|-------|------|---------|----|--------|
| <b>C354</b> | 0.1  | 0.03  | 10   | 0.001   | 30 | 10000  |
| <b>C355</b> | 0.2  | 0.04  | 10   | 0.002   | 20 | 5000   |
| <b>C356</b> | 4.8  | 0.021 | 100  | 0.00025 | 84 | 401606 |
| <b>C357</b> | 3.1  | 0.015 | 12.5 | 0.002   | 8  | 6250   |
| <b>C358</b> | 30.4 | 0.02  | 500  | 0.002   | 10 | 250000 |

### *Second Generation Library*

**Table S5: Inhibition values of the second generation library compounds on GCS, GBA1 and GBA2**

| <b>Entry:</b> | <b>IC<sub>50</sub> on GCS<br/>(in situ) in uM</b> | <b>IC<sub>50</sub> on GBA1<br/>(in vitro) in uM</b> | <b>IC<sub>50</sub> on GBA2<br/>(in vitro) in uM</b> | <b>Ratio<br/>GCS/GBA2</b> | <b>Ratio<br/>GBA1/GBA2</b> |
|---------------|---------------------------------------------------|-----------------------------------------------------|-----------------------------------------------------|---------------------------|----------------------------|
| <b>B44</b>    | 4                                                 | 23                                                  | 0.0009                                              | 4444                      | 25556                      |
| <b>B45</b>    | 6                                                 | 3                                                   | 0.004                                               | 1500                      | 750                        |
| <b>B46</b>    | 0.76                                              | 4                                                   | 0.005                                               | 152                       | 800                        |
| <b>B47</b>    | 53                                                | 156                                                 | 0.042                                               | 1262                      | 3714                       |
| <b>B48</b>    | 1                                                 | 1000                                                | 0.025                                               | 40                        | 40000                      |
| <b>B49</b>    | 7.2                                               | 51                                                  | 0.018                                               | 400                       | 2833                       |
| <b>B50</b>    | 0.64                                              | 13                                                  | 0.009                                               | 71                        | 1444                       |
| <b>B51</b>    | 0.12                                              | 13                                                  | 0.009                                               | 13                        | 1444                       |
| <b>B52</b>    | 0.35                                              | 11                                                  | 0.004                                               | 88                        | 2750                       |
| <b>B53</b>    | 0.38                                              | 6                                                   | 0.002                                               | 190                       | 3000                       |
| <b>B54</b>    | 10                                                | 63                                                  | 0.035                                               | 286                       | 1800                       |
| <b>B55</b>    | 50                                                | 325                                                 | 0.12                                                | 417                       | 2708                       |
| <b>B56</b>    | 0.729                                             | 100                                                 | 0.0006                                              | 1215                      | 166667                     |
| <b>B57</b>    | 2.5                                               | 1000                                                | 0.021                                               | 119                       | 47619                      |
| <b>B58</b>    | 0.1                                               | 176                                                 | 0.003                                               | 33                        | 58667                      |
| <b>B59</b>    | 5                                                 | 196                                                 | 0.006                                               | 833                       | 32667                      |
| <b>B60</b>    | 0.053                                             | 328                                                 | 0.007                                               | 8                         | 46857                      |
| <b>B61</b>    | 0.12                                              | 205                                                 | 0.001                                               | 120                       | 205000                     |

## S9 Crystallography

### *Gene Expression and Protein Purification for TxGH116*

TxGH116 was expressed from a pET-30a plasmid described previously.<sup>18</sup> Competent *E. Coli* BL21 (DE3) cells were transformed and grown in LB media (with 30 µg/mL kanamycin) at 37 °C until an OD<sub>600</sub> of 0.6 had been reached. Expression of the TxGH116 gene was then induced with 0.5 mM IPTG and the cells incubated at 16 °C for 18 hr. Cells were lysed by sonication at 14-18 Hz, four runs of 40-50 seconds exposure, in buffer “A” (20 mM NaPO<sub>4</sub> pH 7.4, 150 mM NaCl). Cell debris was removed by centrifugation for 15 minutes in a Sorvall SS-34 rotor at 38000 g.

The resulting supernatant was heated at 65 °C for 20 minutes and the resulting precipitated protein removed by centrifugation. The remaining soluble fraction (containing the heat resistant TxGH116) was loaded onto a 5 mL GE sciences (GE healthcare) crude HisTrap column, equilibrated with buffer A. Unbound material was removed by washing with three column volumes of buffer A. Bound protein was eluted with a gradient into buffer B (20 mM NaPO<sub>4</sub> pH 7.4, 150 mM NaCl, 500 mM imidazole) across twenty column volumes. The fractions containing TxGH116 were pooled, concentrated and buffer exchanged into “Digest buffer” (20 mM Tris pH 8, 150 mM NaCl). The protein was digested with enterokinase (New England Bio Labs) as per the manufacturer’s instructions overnight, in order to remove the cleaved N terminal His and “S” tags, and then buffer exchanged into GF buffer using a 50 kDa MWCO centrifugal filter (Millipore Corp). The protein was then purified over a Superdex S200 gel filtration column, which had been equilibrated with GF buffer (20 mM Tris pH 8, 500 mM NaCl) and the fractions containing TxGH116 pooled, concentrated to 20 mg/mL in a 50 kDa MW cut-off centrifugal filter (Millipore Corp) and flash frozen at -80 °C.

### *Crystallization, Structure Solution and Refinement of TxGH116 in Complex with 5.*

TxGH116 was diluted to ~2 mg/mL and crystallization trials were set up using 350 nL of protein solution and 350 nL of mother liquor (0.2 M ammonium sulfate, 20% PEG 3350, 0.1M BisTris pH 5.5 - 6.7) in 48-well plate format sitting drop plates at 18°C. Crystals of TxGH116 were soaked in compound **5** ligand residue resuspended in the corresponding mother liquor (0.2 M ammonium sulfate, 20% PEG 3350, 0.1M BisTris pH 6.7) overnight to allow covalent binding. A cryoprotectant of 25% (v/v) glycerol together with the mother liquor was used. Diffraction data for the crystals was collected on beamline I03 beamline at the Diamond Light Source.

Data were processed using XDS<sup>20</sup> and the Aimless data reduction pipeline through the CCP4i2 software.<sup>20</sup> The previous TxGH116C PDB structure (5BVU)<sup>18</sup> was used to determine the phases and solve the structure. Refinement of the structures was performed using REFMAC<sup>21</sup> and model building completed using COOT, both programs run through the CCP4i2 software.<sup>22</sup> Ligand coordinates and restraints were built using JLigand.<sup>23</sup> Crystal structure illustrations were generated using CCP4mg.<sup>24</sup> Data collection and refinement statistics are shown in Table S7.

Final refined coordinates, and observed structure factor amplitudes, have been deposited on the PDB with accession code 5NCX.

**Table S6: Data collection and Refinement Statistics for the TxGH116 structure in complex with 5**

| <b>TxGH116 with 5</b>                               |                                 |
|-----------------------------------------------------|---------------------------------|
| PDB Code                                            | 5NCX                            |
| <b>Data collection</b>                              |                                 |
| Space group                                         | P2 <sub>1</sub> 22 <sub>1</sub> |
| Cell dimensions                                     |                                 |
| <i>a, b, c</i> (Å)                                  | 53.62, 83.30, 177.48            |
| Resolution (Å)                                      | 60-1.70 (1.75 - 1.70) *         |
| <i>R</i> <sub>merge</sub>                           | 0.096 (1.00)                    |
| <i>R</i> <sub>pim</sub>                             | 0.044 (0.46)                    |
| CC(1/2)                                             | 0.998 (0.58)                    |
| <i>I</i> / $\sigma$ <i>I</i>                        | 12.4(1.7)                       |
| Completeness (%)                                    | 99.5(99.2)                      |
| Redundancy                                          | 5.7(5.6)                        |
| <b>Refinement</b>                                   |                                 |
| Resolution (Å)                                      | 88.90-1.70                      |
| No. reflections                                     | 87654/4371                      |
| <i>R</i> <sub>work</sub> / <i>R</i> <sub>free</sub> | 0.15/0.18                       |
| No. atoms                                           |                                 |
| Protein                                             | 6228                            |
| Ligand/ion                                          | 26                              |
| Water                                               | 371                             |
| <i>B</i> -factors (Å <sup>2</sup> )                 |                                 |
| Protein                                             | 20                              |
| Ligand/ion                                          | 34                              |
| Water                                               | 28                              |
| R.m.s. deviations                                   |                                 |
| Bond lengths (Å)                                    | 0.020                           |
| Bond angles (°)                                     | 1.99                            |

\*Values in parentheses are for highest-resolution shell.

**Accessibility of TxGH116 Binding Pocket**

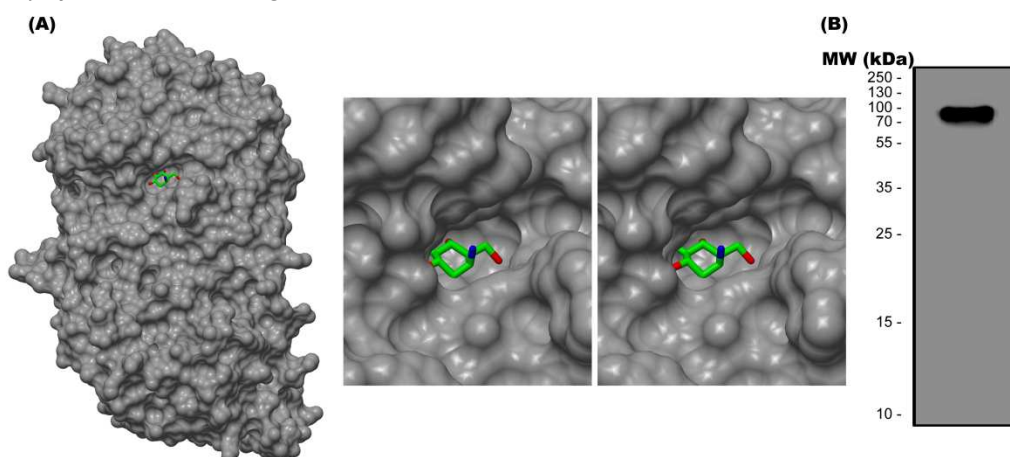

**Figure S4.** Accessibility of TxGH116 binding pocket to ABPs and other molecules (A) Surface view of TxGH116, with a divergent (wall-eyed) stereo image close up of the enzyme binding pocket containing bound **5** (green). The TxGH116 binding pocket is freely accessible to solvent and can accommodate ABPs with larger linker moieties such as **4**. (B) Fluorescent gel of 0.5 µg/µL TxGH116 (~90kDa) after reaction with 500nM ABP **4**, illustrating that tagged ABPs can readily react with this enzyme.



## References

- (1) Hansen, F. G., Bundgaard, E., Madsen, R., *J. Org. Chem.* **2005**, 70, 10139–10142.
- (2) Kallemeijn, W. W., Li, K.-Y., Witte, M. D., Marques, A. R. A., Aten, J., Scheij, S., Jiang, J., Willems, L. I., Voorn-Brouwer, T. M., van Roomen, C. P. A. A., Ottenhoff, R., Boot, R. G., van den Elst, H., Walvoort, M. T. C., Florea, B. I., Codée, J. D. C., van der Marel, G. A., Aerts, J. M. F. G., Overkleeft, H. S. *Angew. Chem. Int. Ed.* **2012**, 124, 12697–12701.
- (3) Wenekes, T., Meijer, A. J., Groen, A. K., Boot, R. G., Groener, J. E., Eijk, M. Van, Ottenhoff, R., Bijl, N., Ghauharali, K., Song, H., Shea, T. J. O., Liu, H., Yew, N., Copeland, D., van den Berg, R. J., van der Marel, G. A. Overkleeft, H. S., Aerts, J. M.F.G. *J. Med. Chem.* **2010**, 53, 689–698.
- (4) Takahata, H., Banba, Y., Ouchi, H., Nemoto, H. *Org. Lett.* **2003**, 5, 2527–2529.
- (5) Van den Nieuwendijk, A. M. C. H., van den Berg, R. J. B. H. N., Ruben, M., Witte, M. D., Brussee, J., Boot, R. G., van der Marel, G. A., Aerts, J. M. F. G., Overkleeft, H. S. *Eur. J. Org. Chem.* **2012**, 18, 3437–3446
- (6) Wenekes, T., Bongers, K. M., Vogel, K., van den Berg, R. J. B. H. N., Strijland, A., Donker-Koopman, W. E., Aerts, J. M. F. G., van der Marel, G. A., Overkleeft, H. S. *European J. Org. Chem.* **2012**, 32, 6420–6454.
- (7) Bongers, K. M., Wenekes, T., de Lavoie, S. V. P., Esposito, D., van den Berg, R. J. B. H. N., Litjens, R. E. J. N., van der Marel, G. A., Overkleeft, H. S. *QSAR Comb. Sci.* **2006**, 25, 491–503.
- (8) Ghisaidoobe, A. T., Bikker, P., de Bruijn, A. C. J., Godschalk, F. D., Rogaar, E., Guijt, M. C., Hagens, P., Halma, J. M., van het Hart, S. M., Luitjens, S. B., van Rixel, V. H. S., Wijzenbroek, M., Zweegers, T., Donker-Koopman, W. E., Strijland, A., Boot, R. G., van der Marel, G. A., Overkleeft, H. S., Aerts, J. M. F. G., van den Berg, R. J. B. H. N. *ACS Med. Chem. Lett.* **2011**, 2, 119–123.
- (9) Van den Berg, R. J. B. H. N., Wenekes, T., Ghisaidoobe, A. T., Donker-Koopman, W. E., Strijland, A., Boot, R. G., van der Marel, G. A., Aerts, J. M. F. G., Overkleeft, H. S. *ACS Med. Chem. Lett.* **2011**, 2, 519–522.
- (10) Ghisaidoobe, A. T., van den Berg, R. J. B. H. N., Butt, S. S., Strijland, A., Donker-Koopman, W. E., Scheij, S., van den Nieuwendijk, A. M. C. H., Koomen, G., van Loevezijn, A., Leemhuis, M., Wenekes, T., van der Stelt, M., van der Marel, G. A., van Boeckel, C. A. A., Aerts, J. M. F. G., Overkleeft, H. S. *J Med Chem* **2014**, 57, 9096–9104.
- (11) Wenekes, T., van den Berg, R. J. B. H. N., Boltje, T. J., Donker-Koopman, W. E., Kuijper, B., van der Marel, G. A., Strijland, A., Verhagen, C. P., Aerts, J. M. F. G., Overkleeft, H. S. *European J. Org. Chem.* **2010**, 7, 1258–1283.
- (12) Wenekes, T., van den Berg, R. J. B. H. N., Bongers, K. M., Donker-Koopman, W. E., Ghisaidoobe, A. T., van der Marel, G. A., Strijland, A., Aerts, J. M. F. G., Overkleeft, H. S. *Tetrahedron Asymmetry* **2009**, 20, 836–846.
- (13) Overkleeft, H. S., Renkema, G. H., Neele, J., Vianello, P., Hung, I. O., Strijland, A., van der Burg, A. M., Koomen, G., Pandit, U. K., Aerts, J. M. F. G. *J. Biol. Chem.* **1998**, 273, 26522–26527.
- (14) Chen, W., Zhao, K., Zhou, G., Nie, H. *Org. Biomol. Chem.* **2016**, 14, 9466–9471.
- (15) Concia, A., Lozano, C., Castillo, José A., Parella, T., Joglar, J., Clapés, P. *Chem. - A Eur. J.* **2009**, 15, 3808–3816.
- (16) Jiang, J., Kallemeijn, W. W., Wright, D. W., van den Nieuwendijk, A. M. C. H., Rohde, V. C., Folch, E. C., van den Elst, H., Florea, B. I., Scheij, S., Donker-Koopman, W. E., Verhoek, M., Li, N., Schürmann, M., Mink, D., Boot, R. G., Codée, J. D. C., van der Marel, G. A., Davies, G. J., Aerts, J. M. F. G., Overkleeft, H. S. *Chem. Sci.* **2015**, 6, 2782–2789.
- (17) Witte, M. D., Walvoort, M. T. C., Li, K.Y., Kallemeijn, W. W., Donker-Koopman, W. E., Boot, R. G., Aerts, J. M. F. G., Codée, J. D. C., van der Marel, G. A., Overkleeft, H. S. *ChemBioChem*, **2011**, 12: 1263–1269.
- (18) Charoenwattanasatien, R., Pengthaisong, S., Breen, I., Mutoh, R., Sansanya, S., Hua, Y., Tankrathok, A., Wu, L., Songsiriritthigul, C., Tanaka, H., Williams, S. J., Davies, G. J., Kurisu, G., and Cairns, J. R. *ACS Chem Biol.* **2016**, 11, 1891-1900.
- (19) Kabsch, W. *Acta Crystallogr D Biol Crystallogr.* **2010**, 66, 125-132.
- (20) Winn, M. D., Ballard, C. C., Cowtan, K. D., Dodson, E. J., Emsley, P., Evans, P. R., Keegan, R. M., Krissinel, E. B., Leslie, A. G., McCoy, A., McNicholas, S. J., Murshudov, G. N., Pannu, N. S., Potterton, E. A., Powell, H. R., Read, R. J., Vagin, A., and Wilson, K. S. *Acta Crystallogr D Biol Crystallogr.* **2011**, 67, 235-242.
- (21) Murshudov, G. N., Vagin, A. A., and Dodson, E. J. *Acta Crystallogr D Biol Crystallogr.* **1997**, 53, 240-255.
- (22) Emsley, P., Lohkamp, B., Scott, W. G., and Cowtan, K. *Acta Crystallogr D Biol Crystallogr.* **2010**, 66, 486-501.
- (23) Lebedev, A. A., Young P, Isupov, M. N., Moroz, O. V., Vagin, A. A., Murshudov, G. N., *Acta Crystallogr D Biol Crystallogr.* **2012**, 68, 431-440.
- (24) McNicholas, S., Potterton, E., Wilson K. S., Noble M. E. M., *Acta Crystallogr D Biol Crystallogr.* **2011**, 67, 386-394.

## Appendix: Copies of $^1\text{H}$ and $^{13}\text{C}$ NMR Spectra

$^1\text{H}$ -NMR and  $^{13}\text{C}$ -NMR of compound A6 in  $\text{CDCl}_3$ .

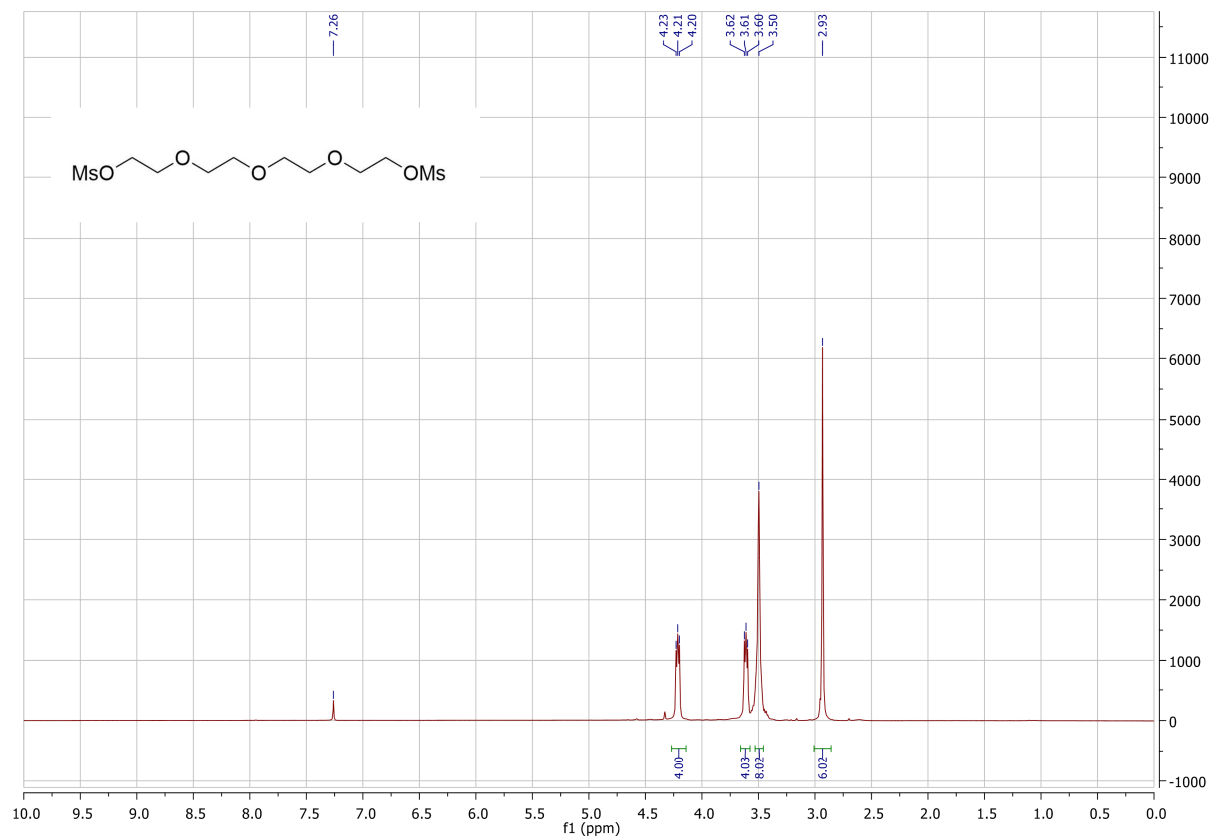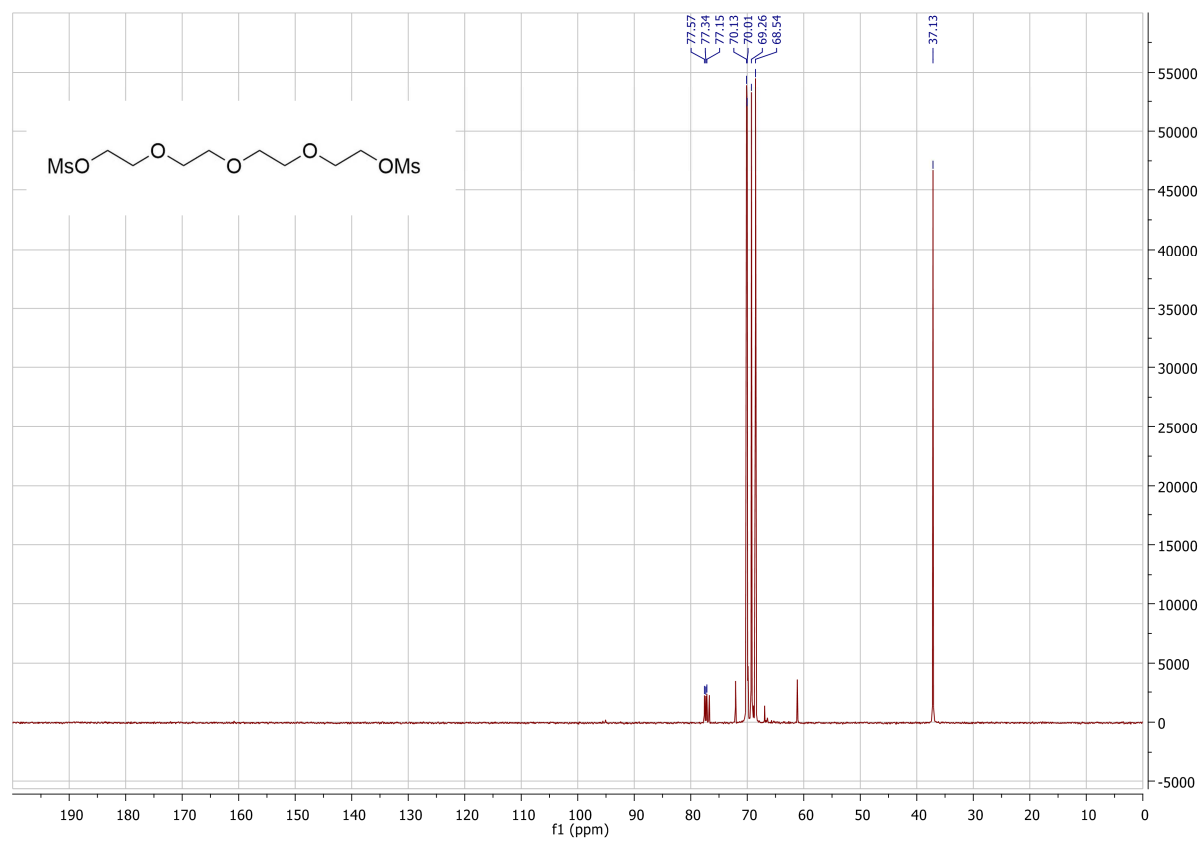

<sup>1</sup>H-NMR and <sup>13</sup>C-NMR of compound A7 in CDCl<sub>3</sub>.

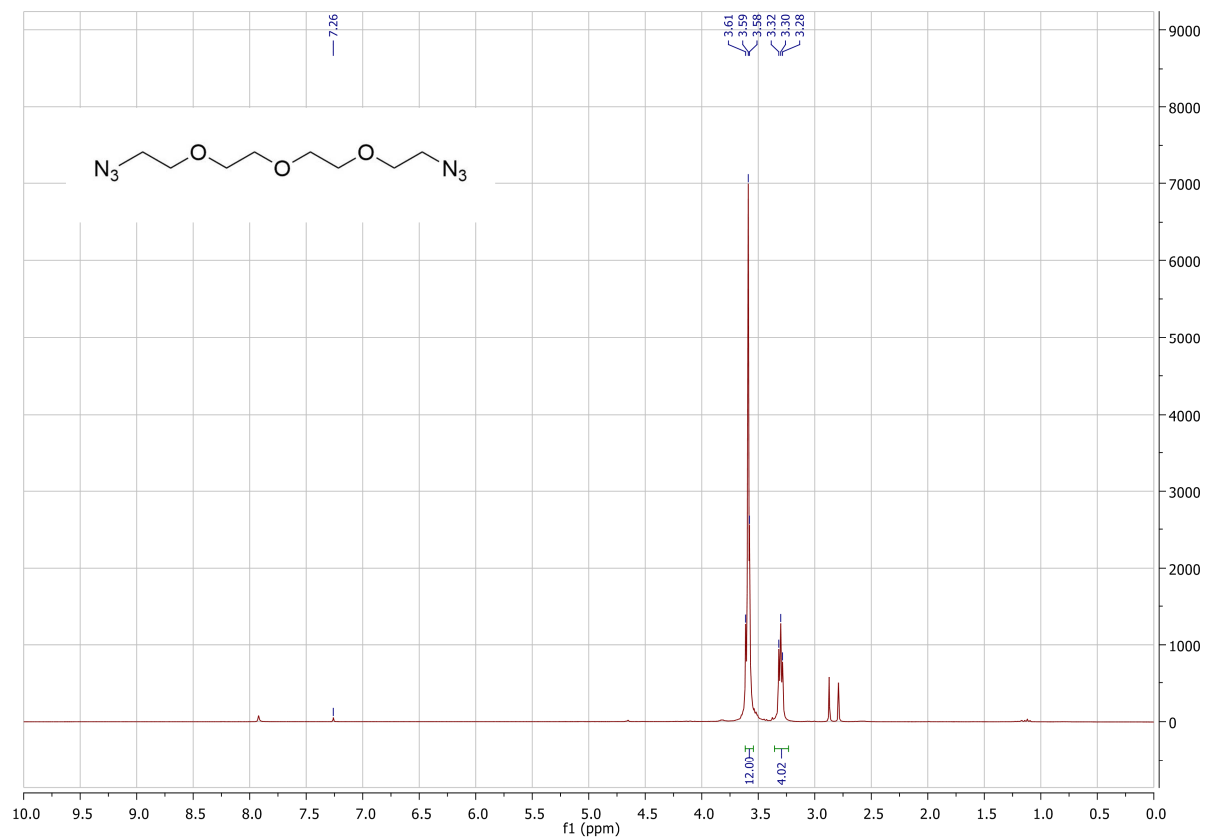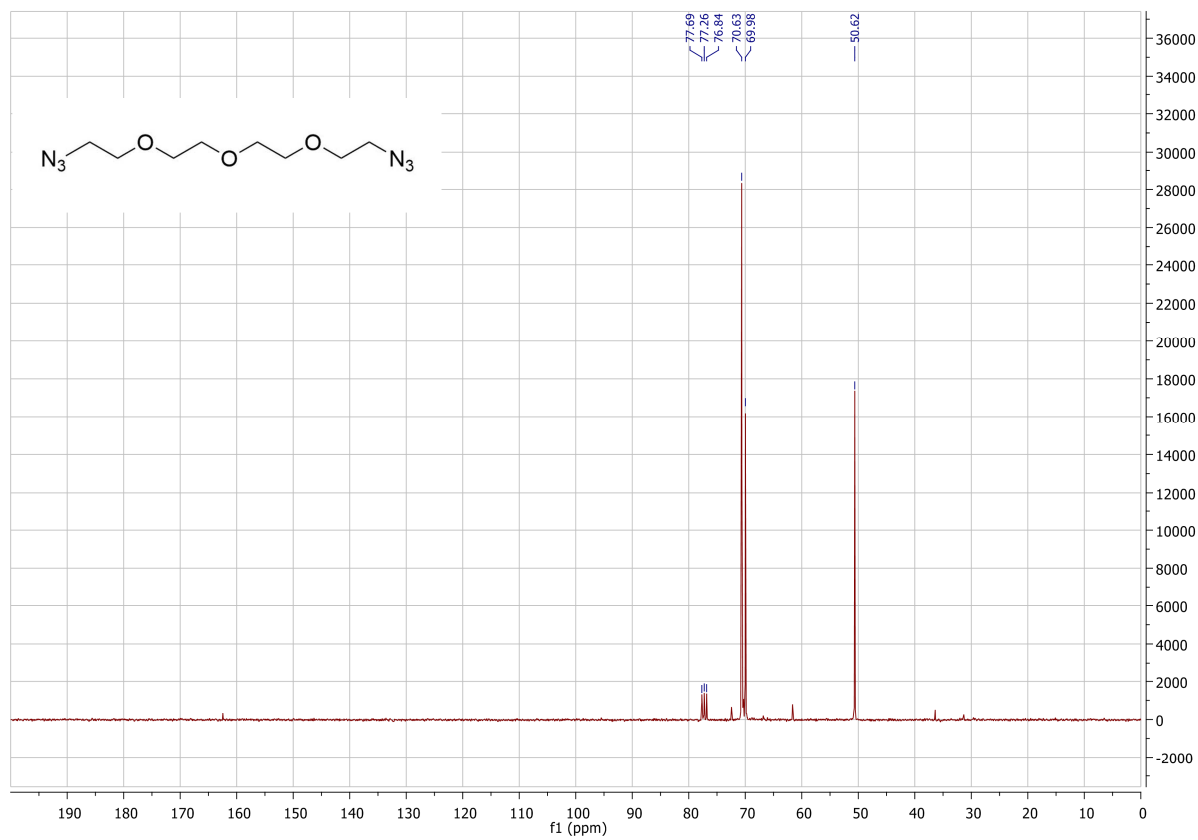

**<sup>1</sup>H-NMR and <sup>13</sup>C-NMR of compound A8 in CDCl<sub>3</sub>.**

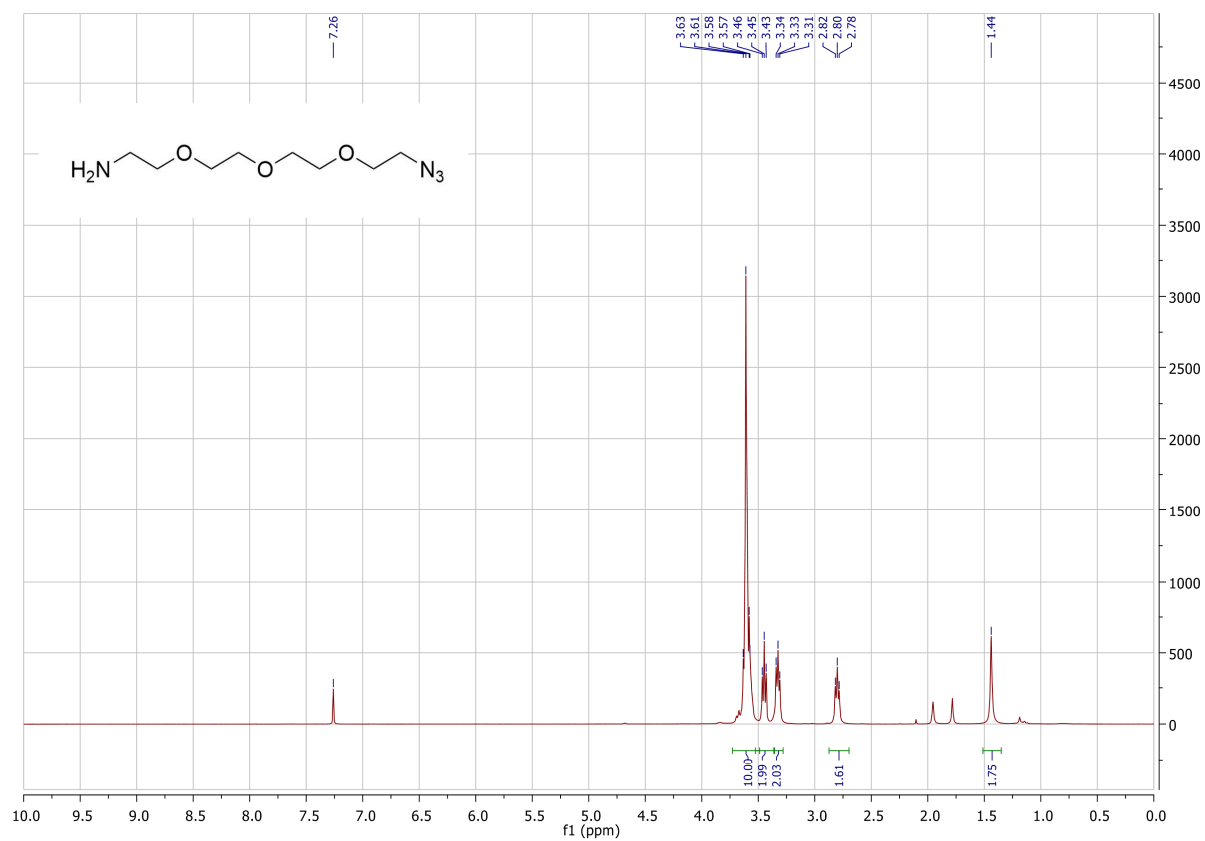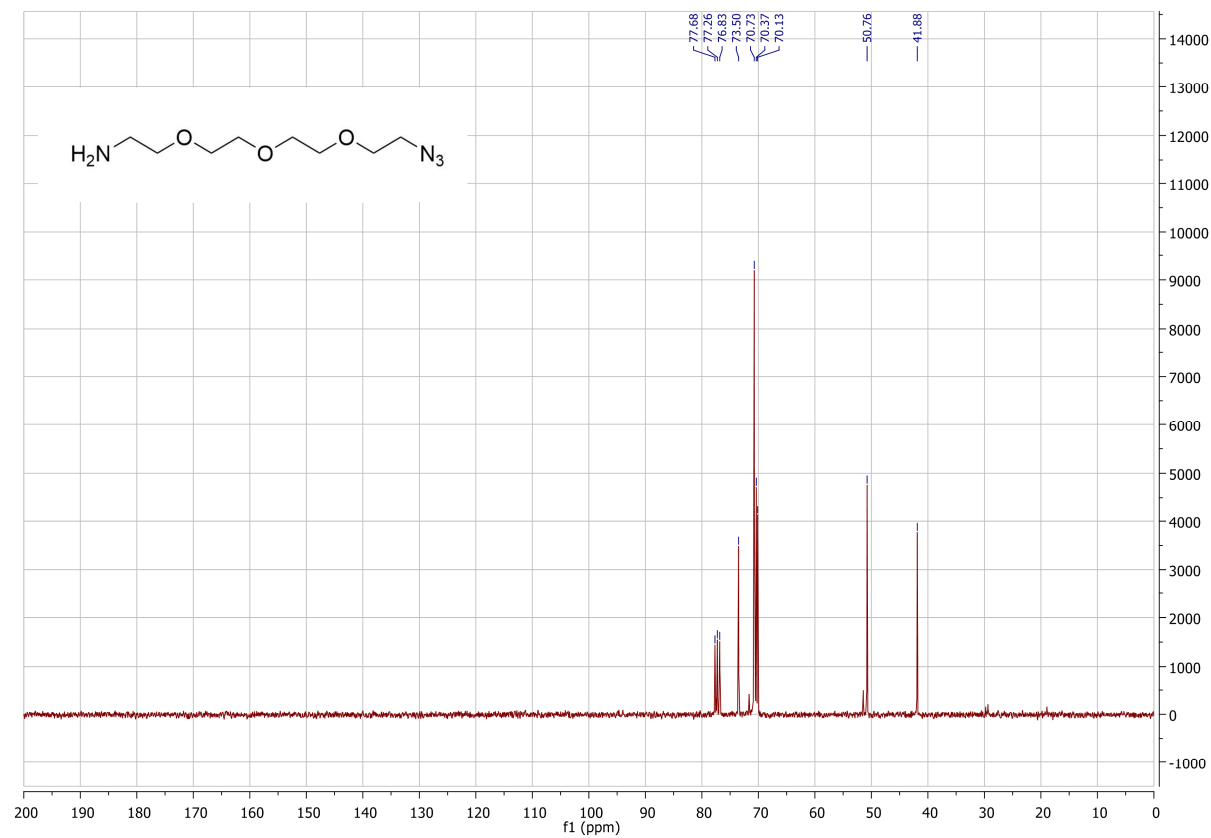



# <sup>1</sup>H-NMR and <sup>13</sup>C-NMR of compound ABP4 in CDCl<sub>3</sub>.

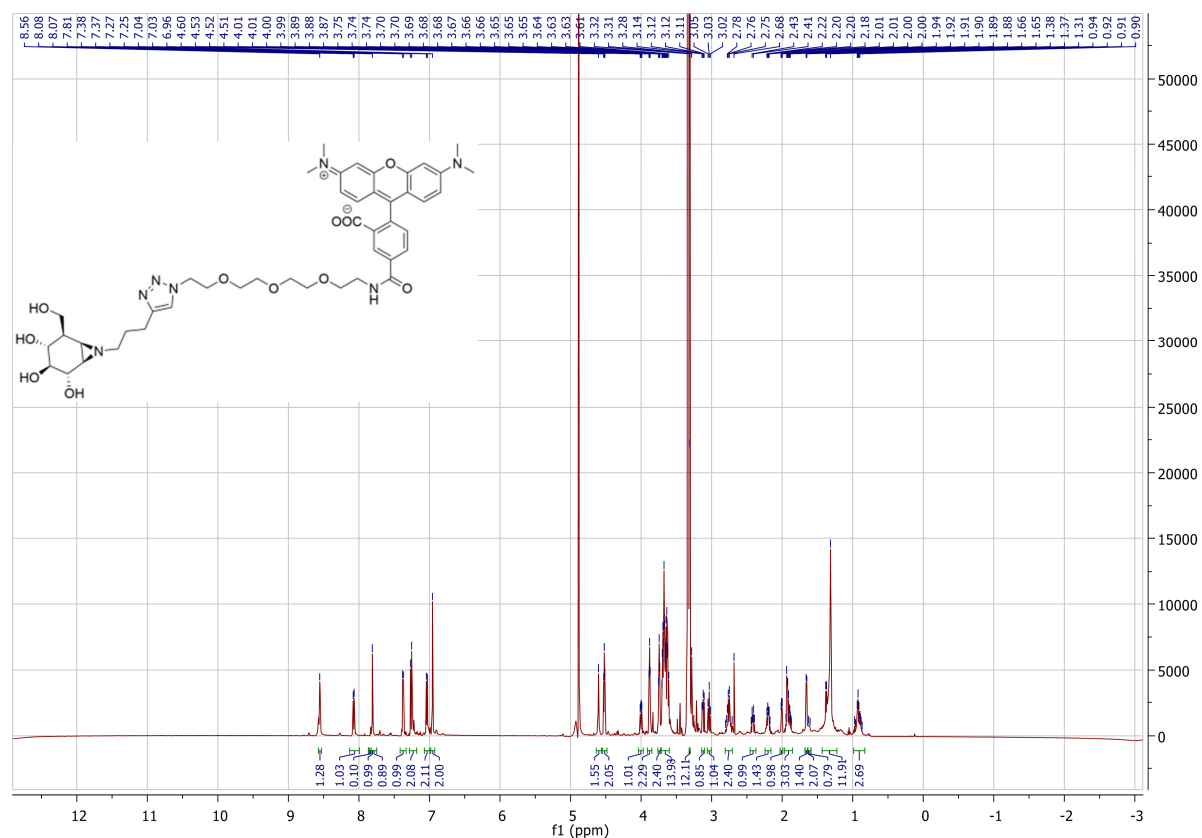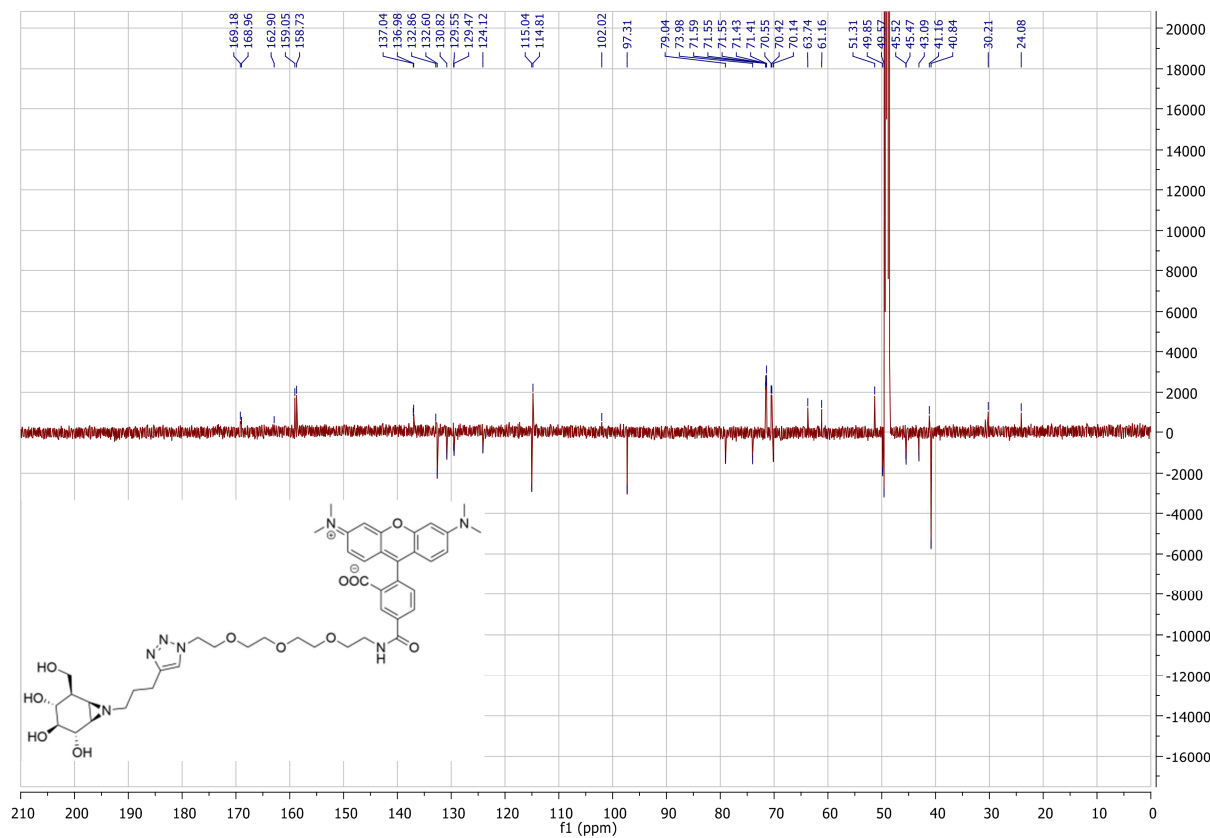

# $^1\text{H-NMR}$ and $^{13}\text{C-NMR}$ of compound B3 in $\text{CDCl}_3$ .

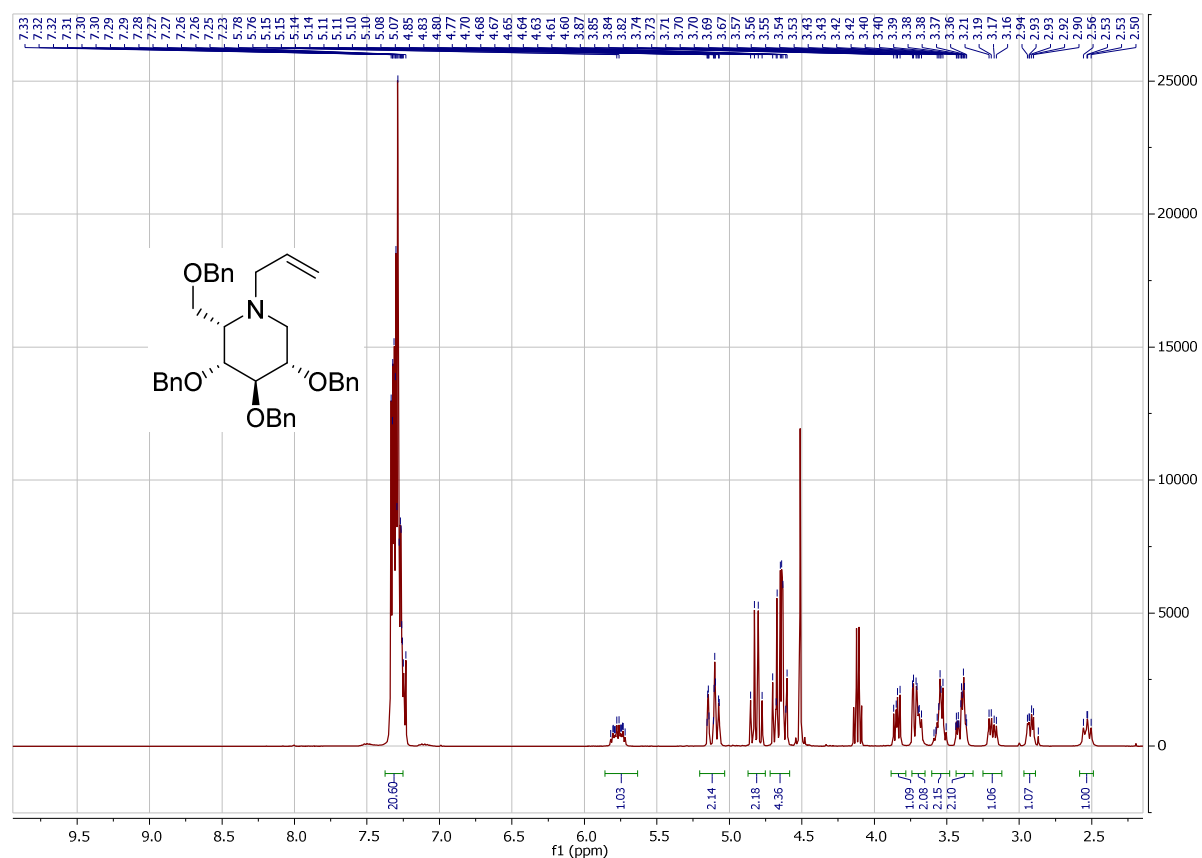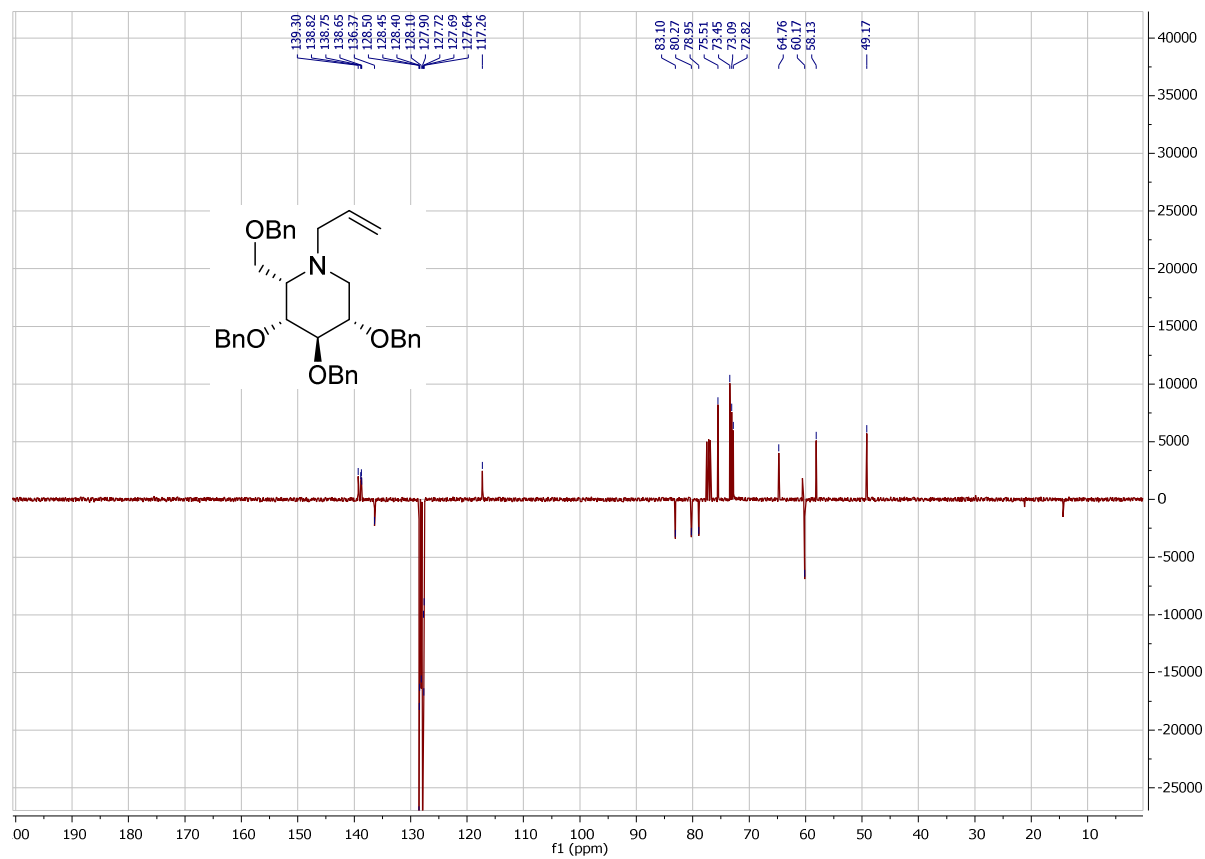

# $^1\text{H-NMR}$ and $^{13}\text{C-NMR}$ of compound B4 in $\text{CDCl}_3$ .

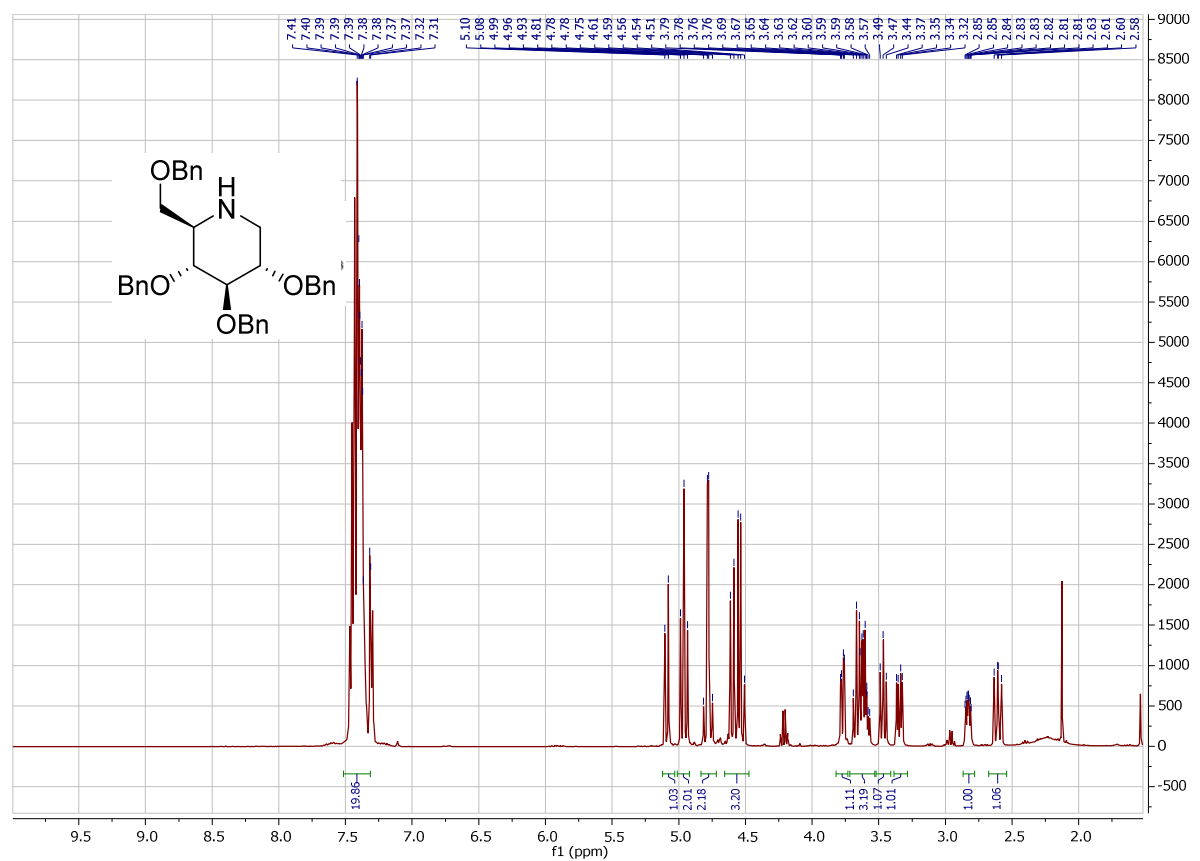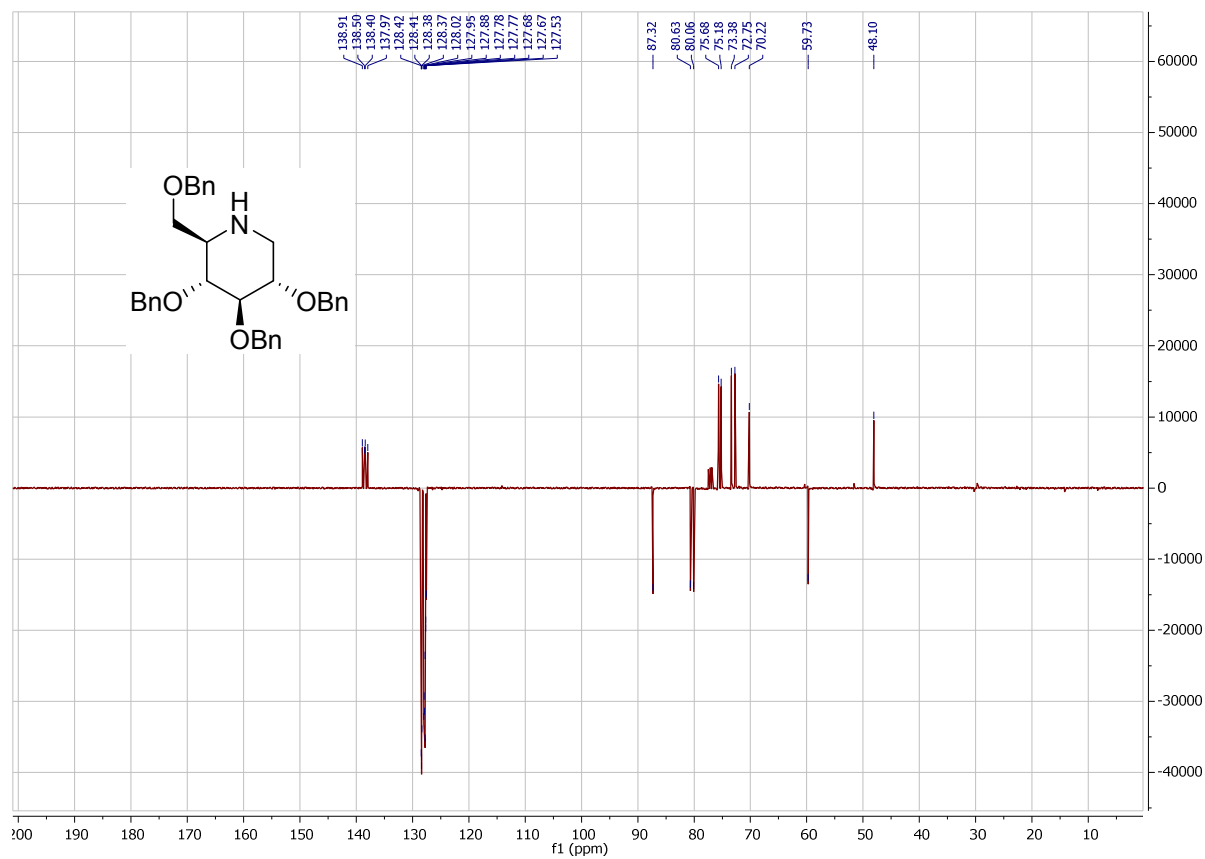



**$^1\text{H-NMR}$  and  $^{13}\text{C-NMR}$  of compound B5 in MeOD.**

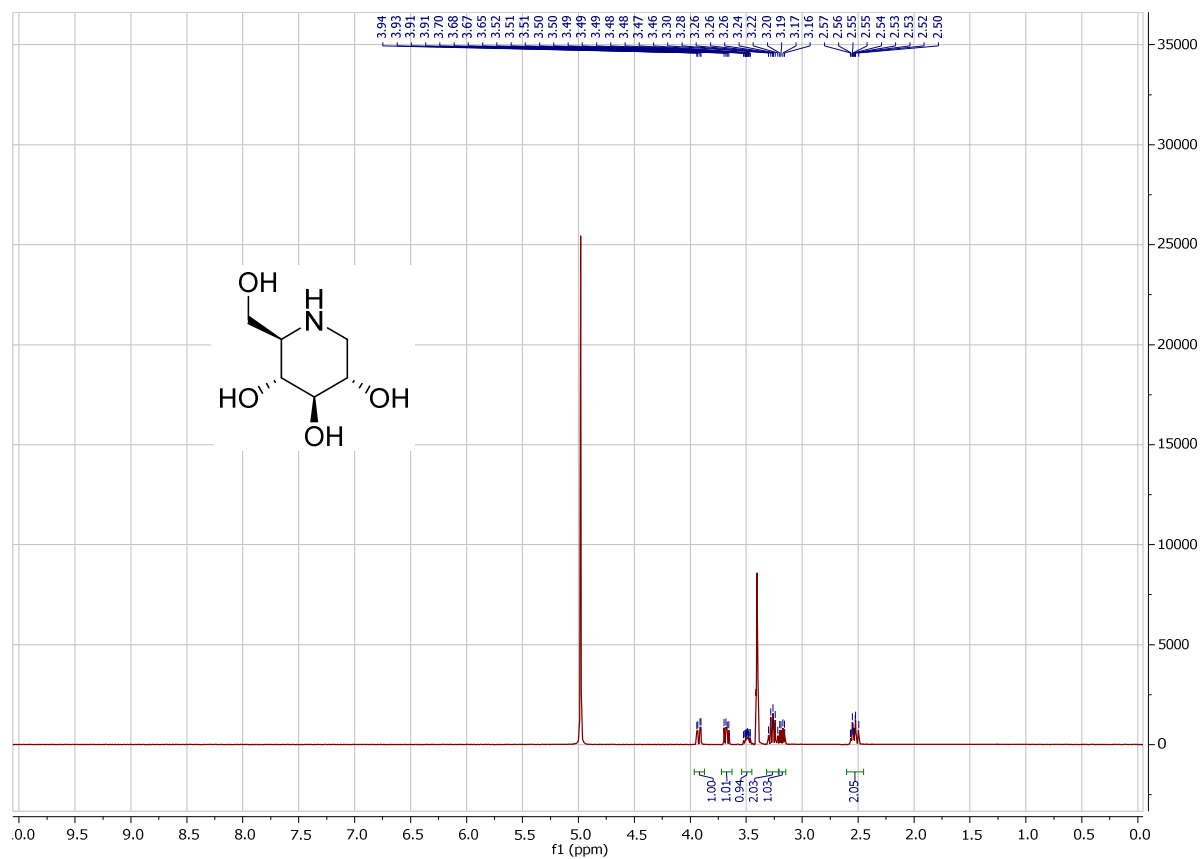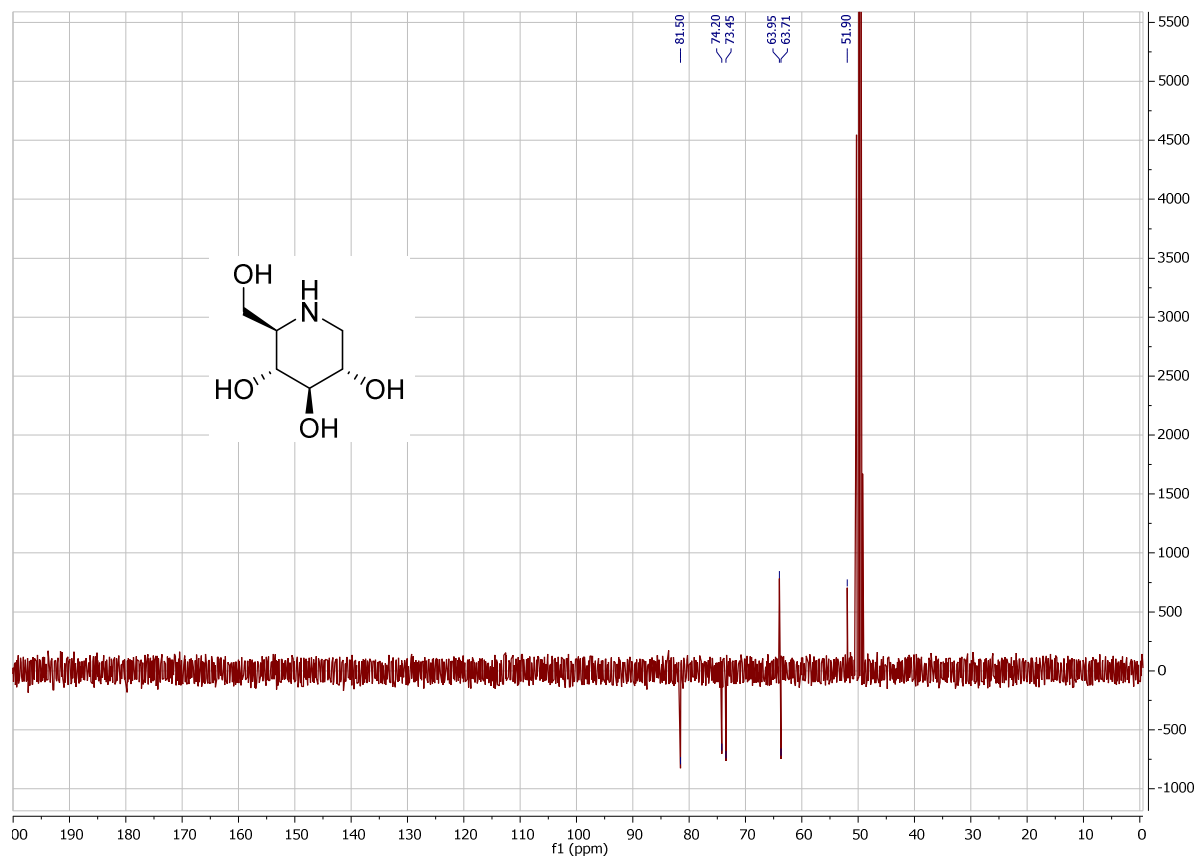

**$^1\text{H-NMR}$  and  $^{13}\text{C-NMR}$  of compound B6 in MeOD.**

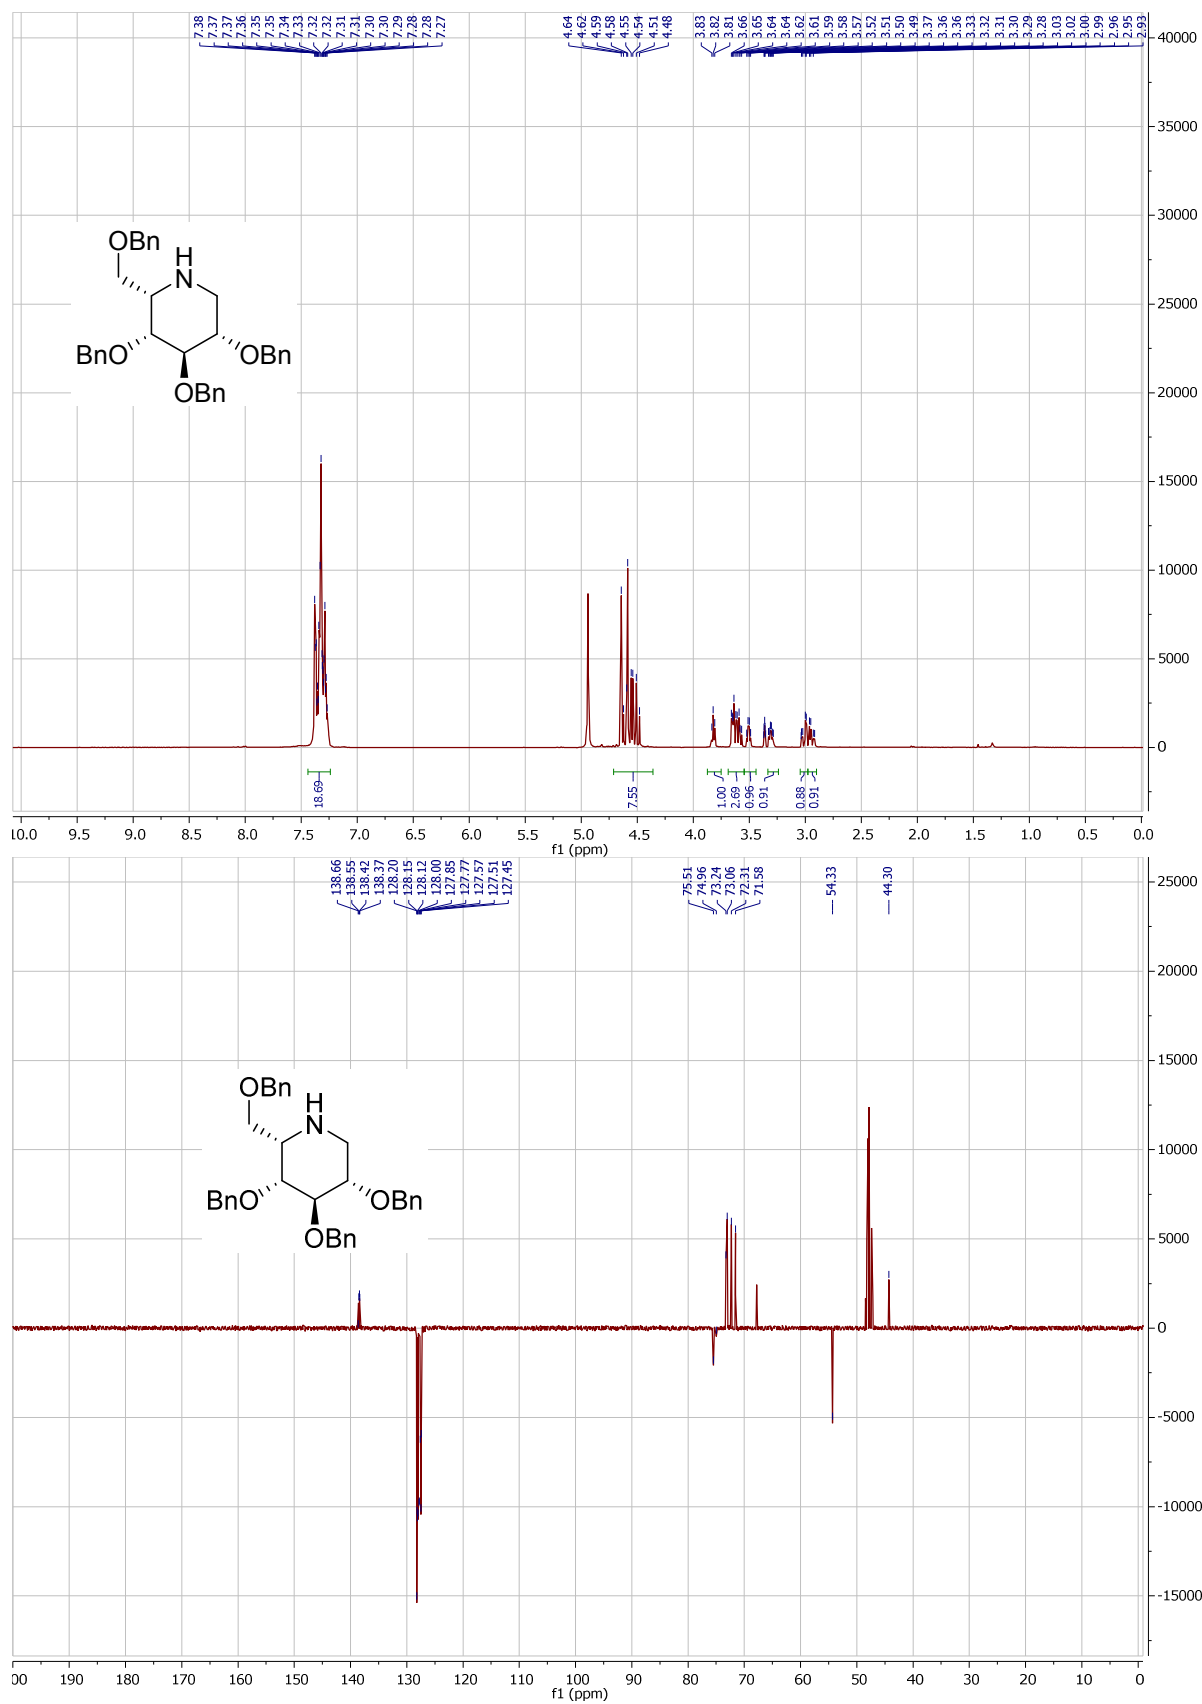

<sup>1</sup>H-NMR and <sup>13</sup>C-NMR of compound B7 in MeOD.

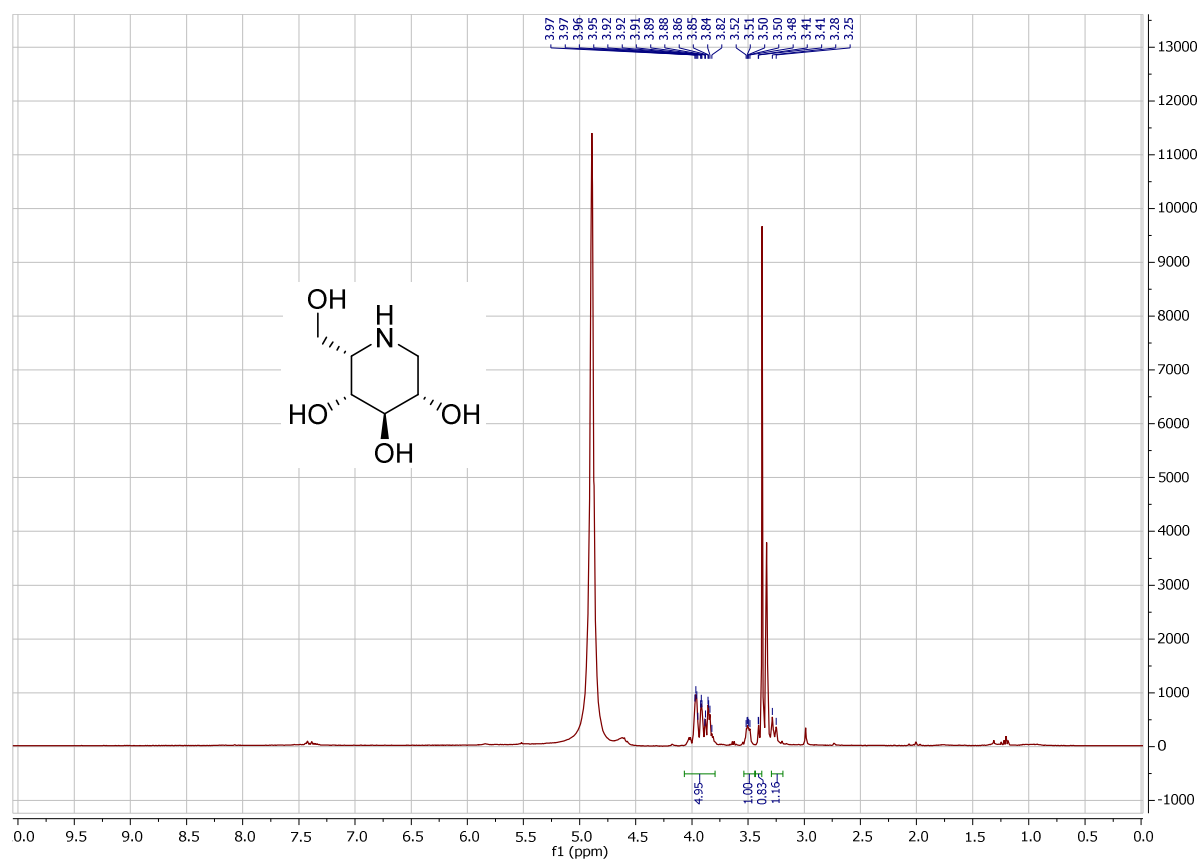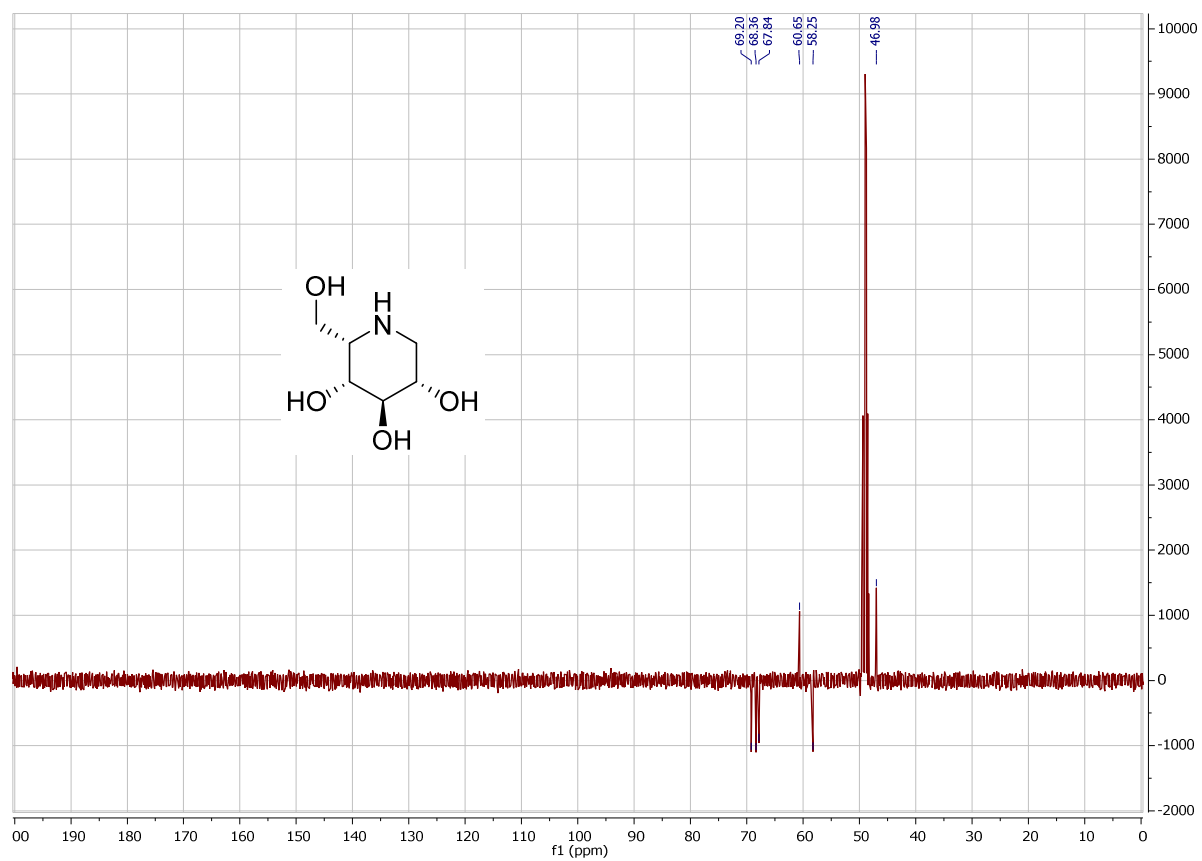

# $^1\text{H-NMR}$ and $^{13}\text{C-NMR}$ of compound B9 in $\text{CDCl}_3$ .

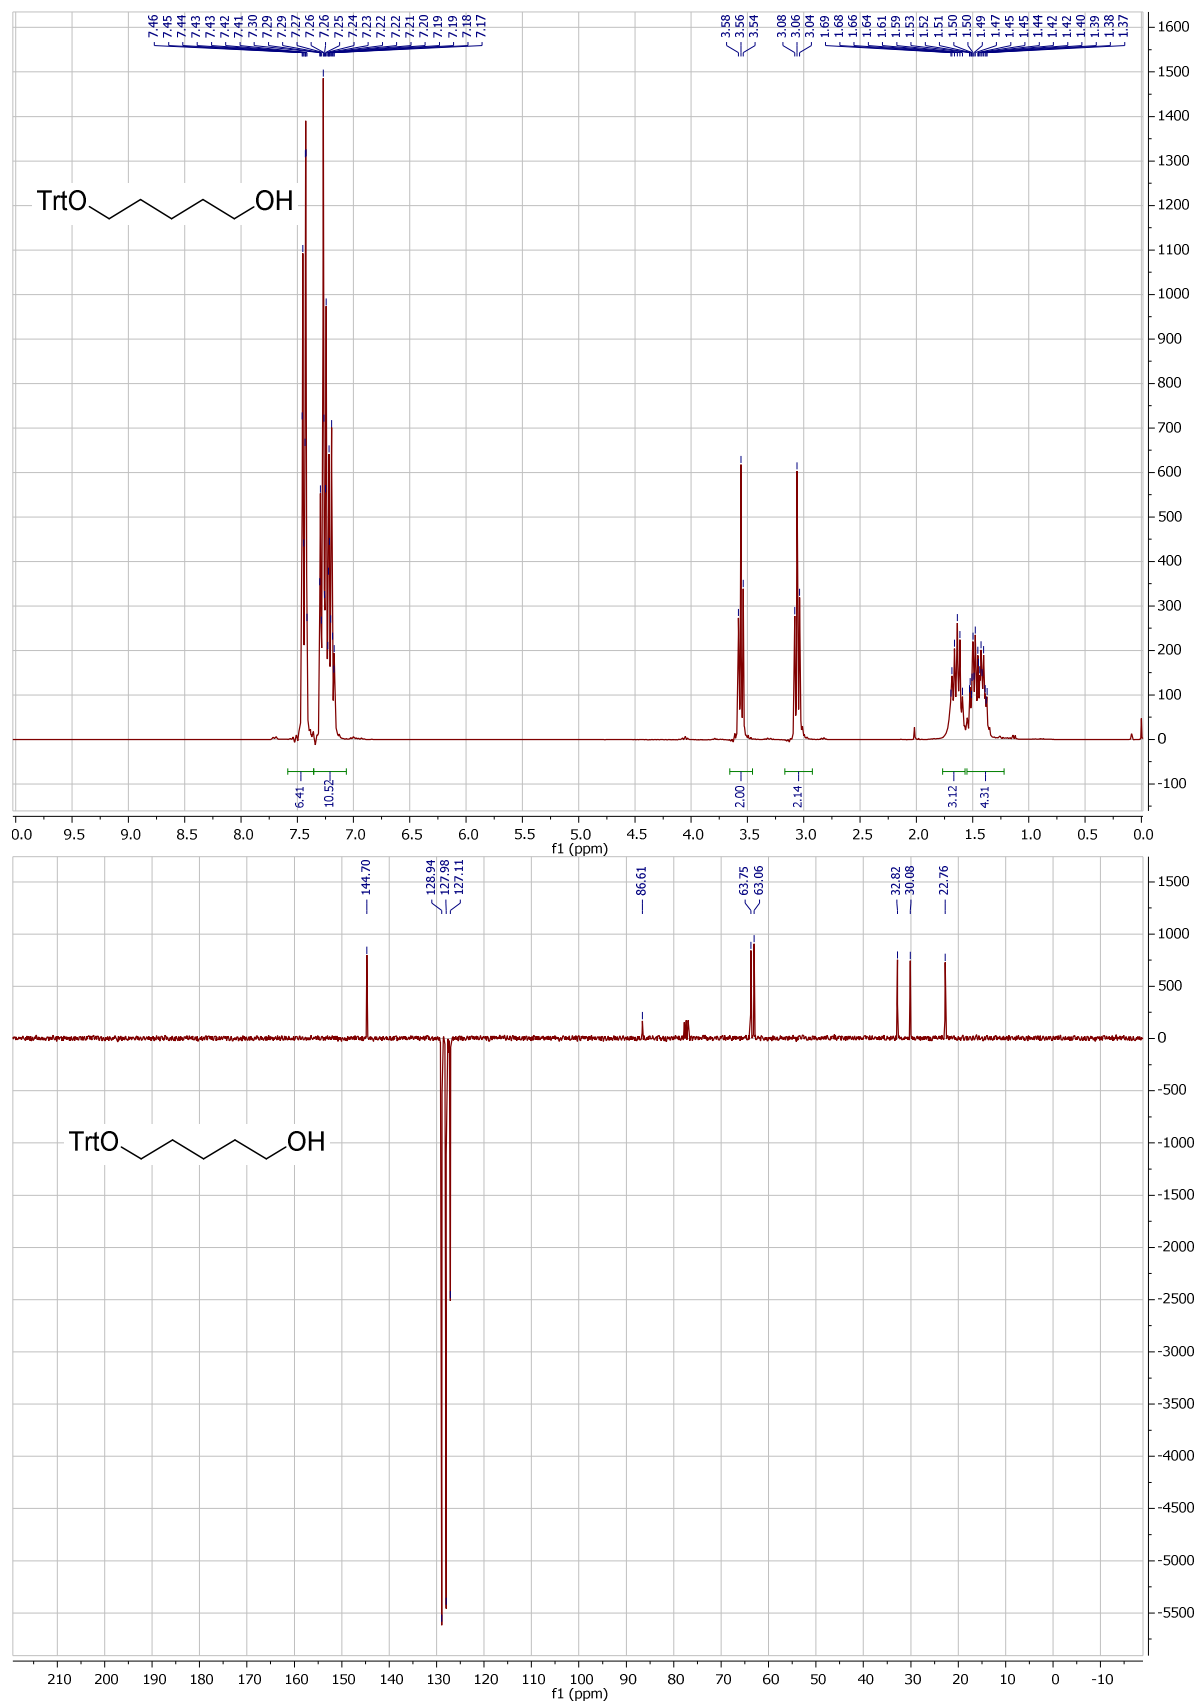

<sup>1</sup>H-NMR and <sup>13</sup>C-NMR of compound B10 in CDCl<sub>3</sub>.

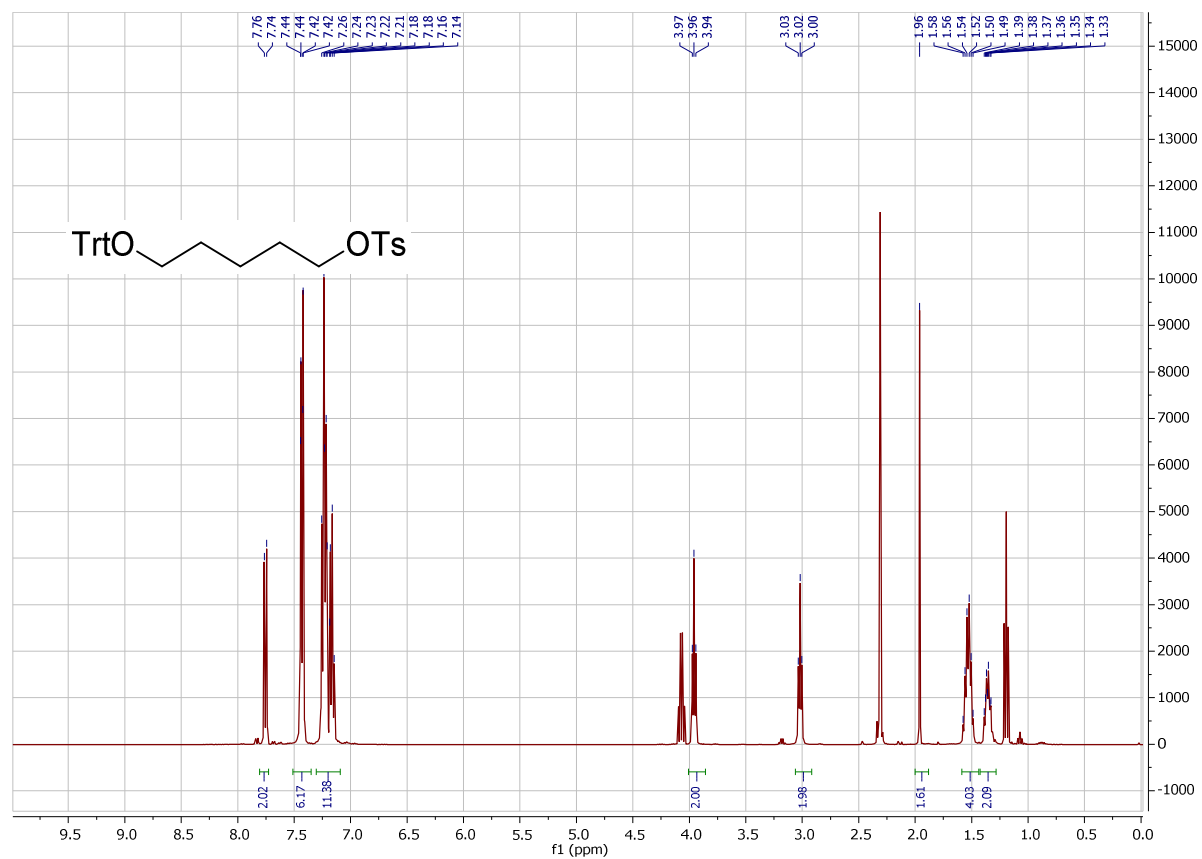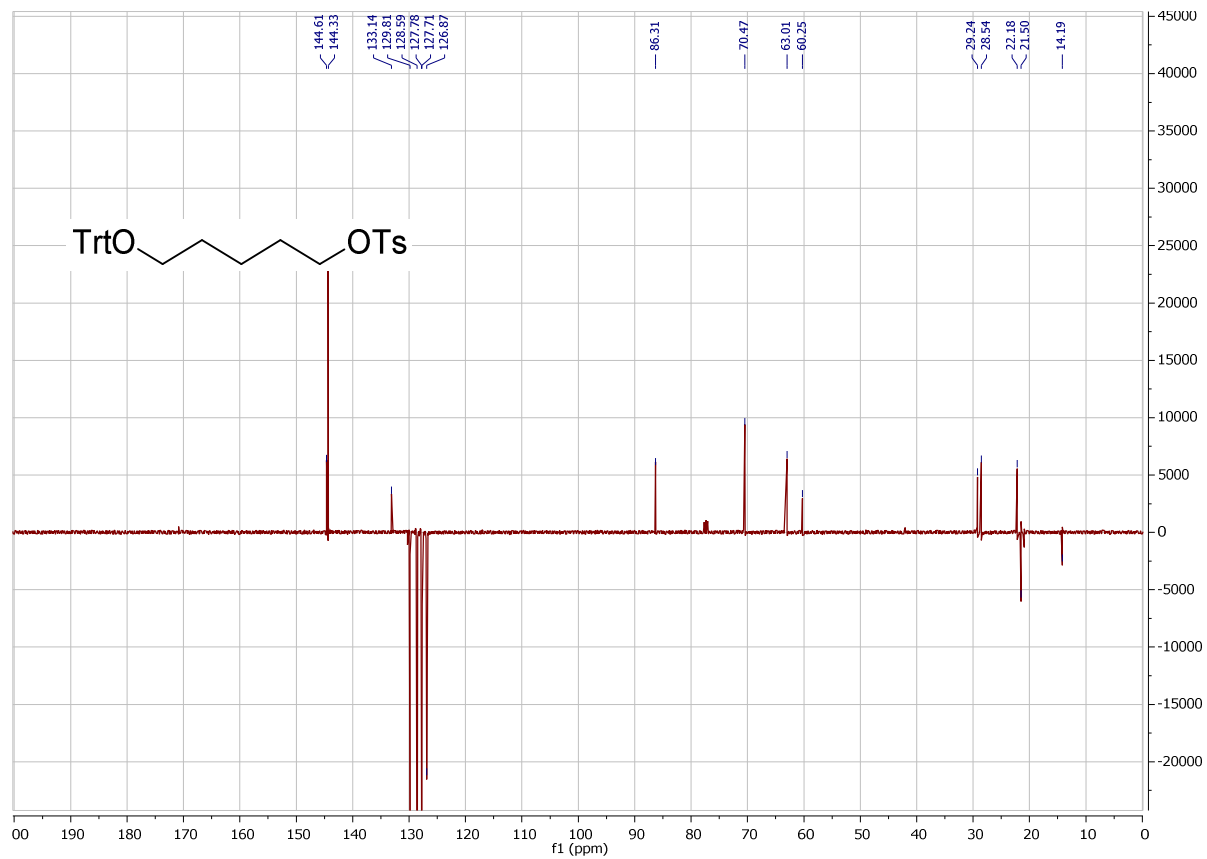

# $^1\text{H-NMR}$ and $^{13}\text{C-NMR}$ of compound B11 in $\text{CDCl}_3$ .

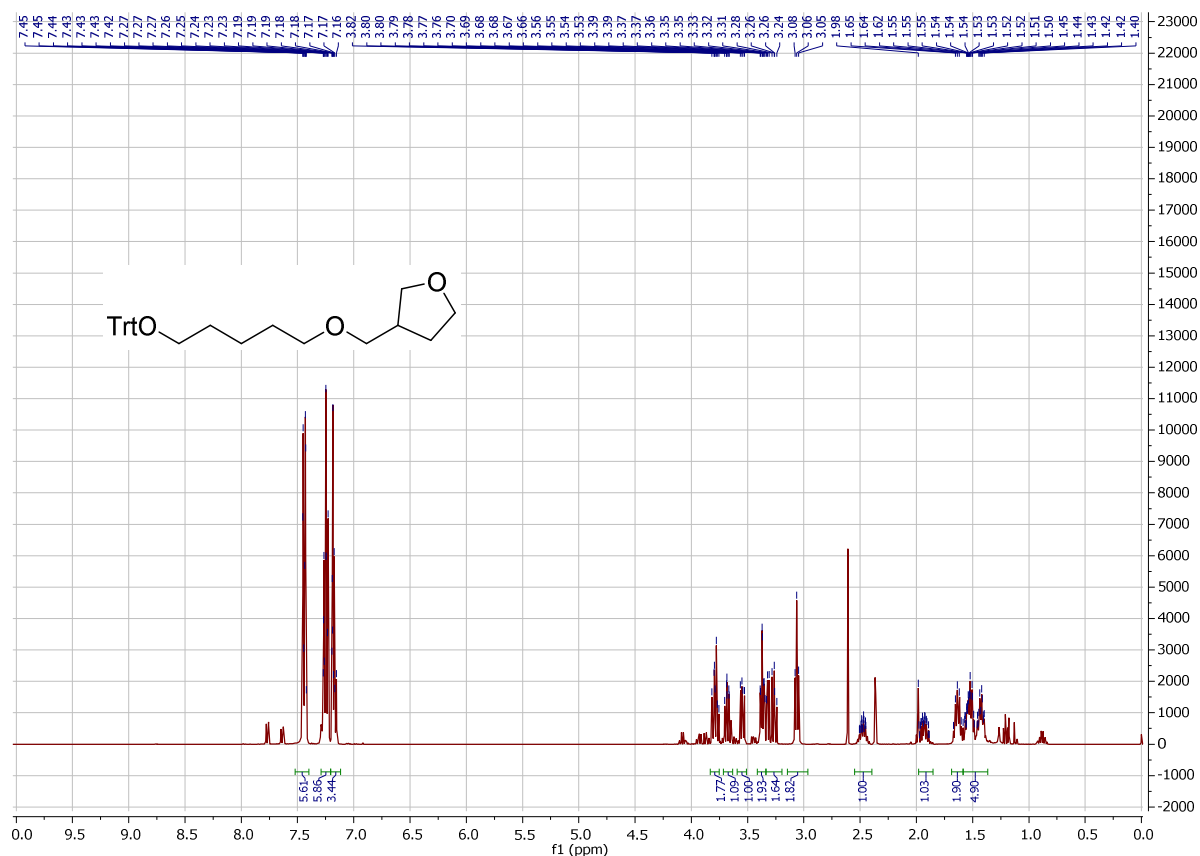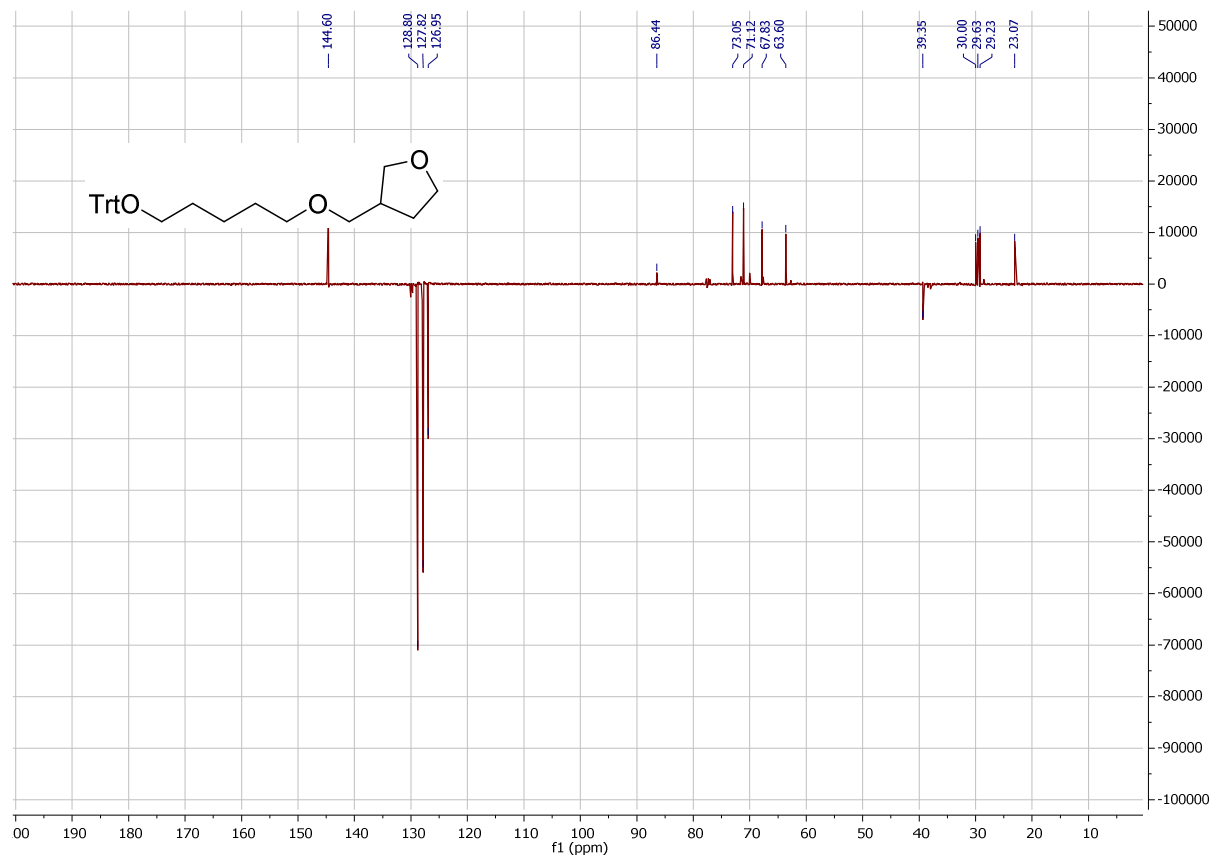

# $^1\text{H-NMR}$ and $^{13}\text{C-NMR}$ of compound B12 in $\text{CDCl}_3$ .

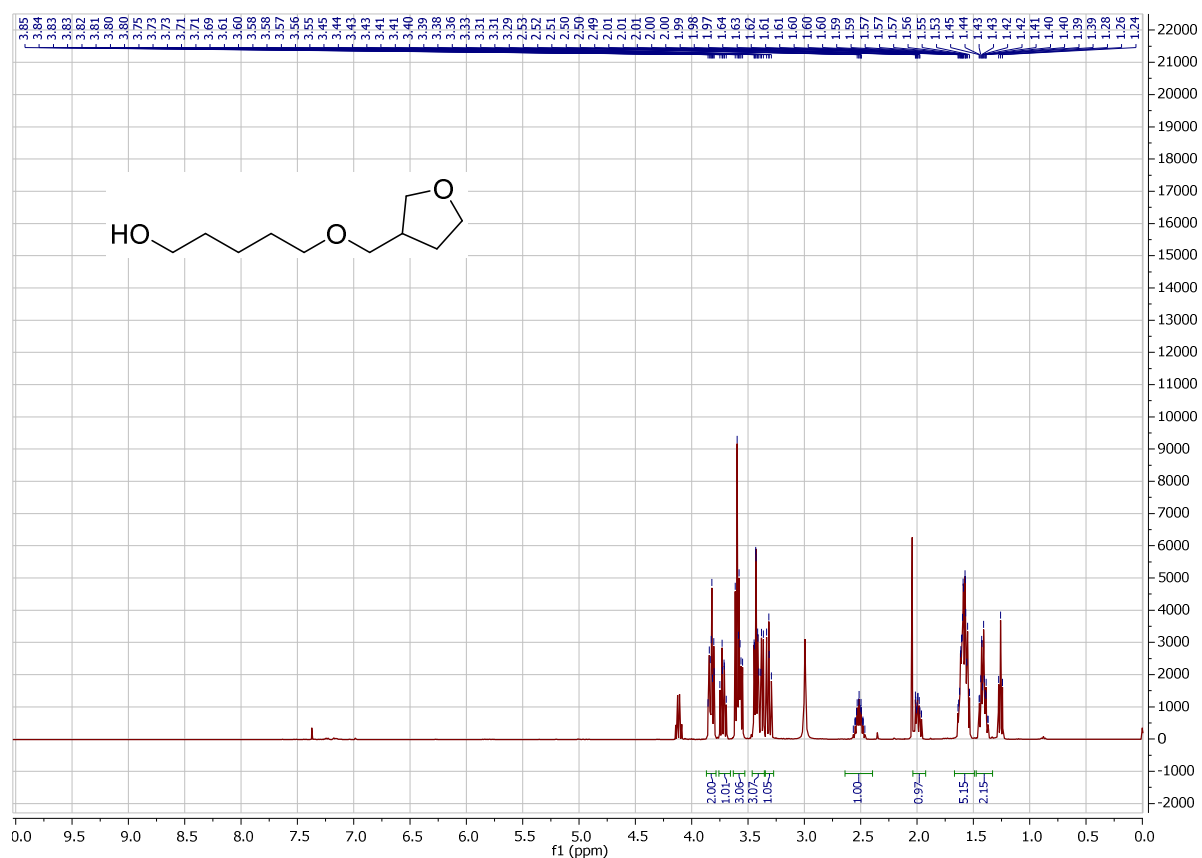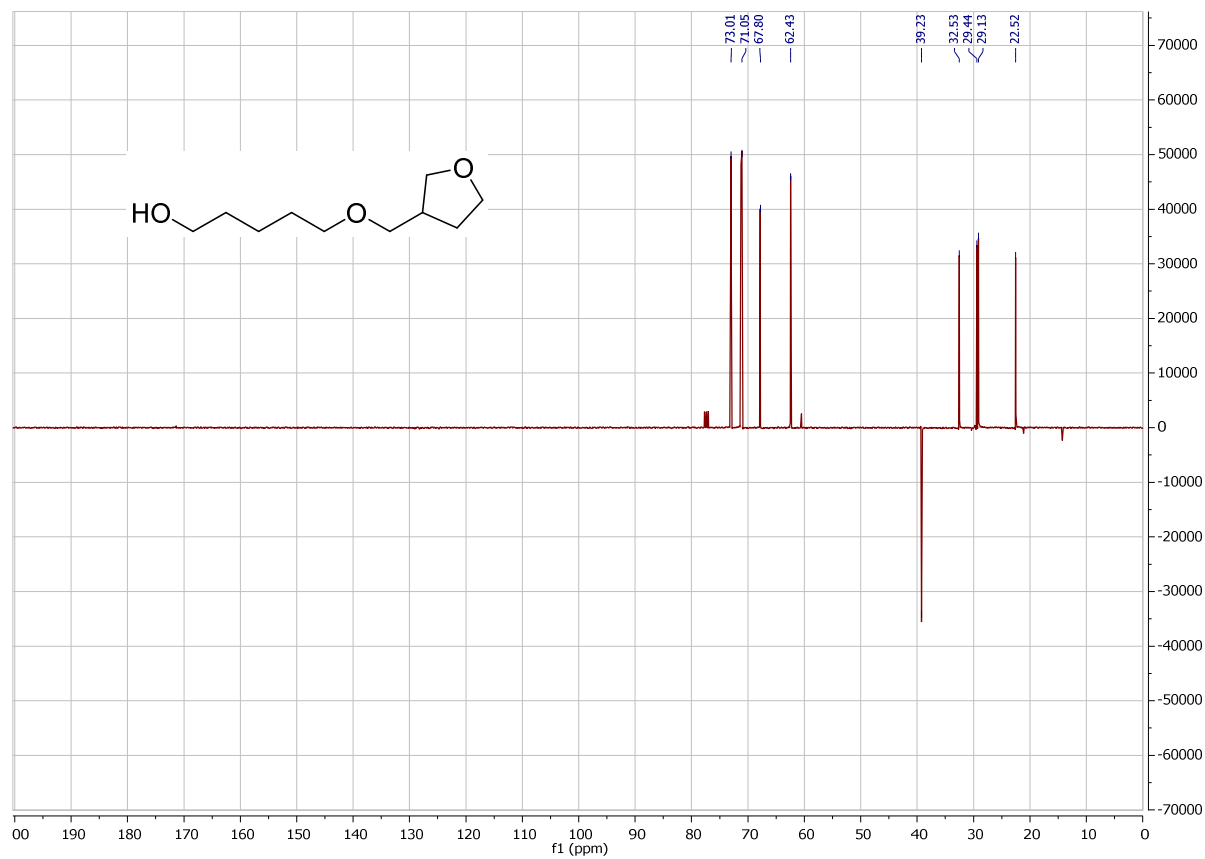

<sup>1</sup>H-NMR and <sup>13</sup>C-NMR of compound B13 in CDCl<sub>3</sub>.

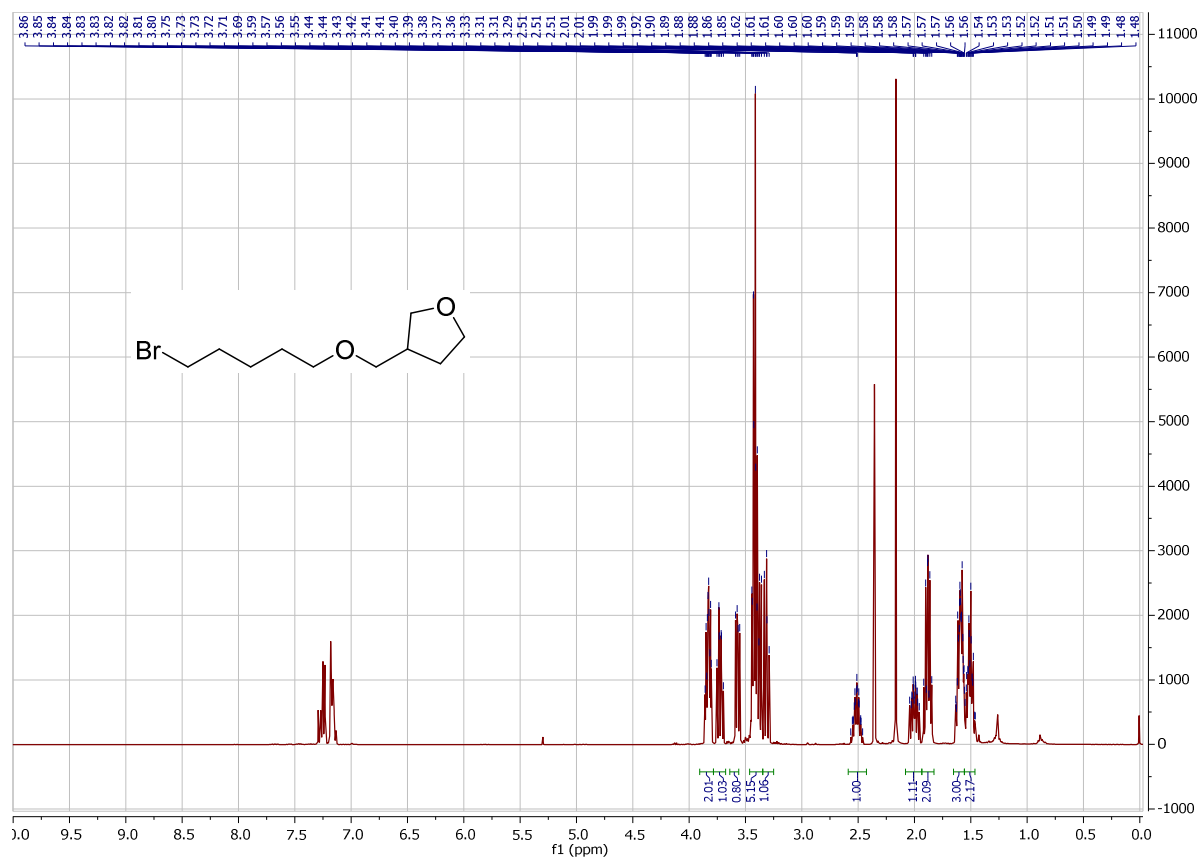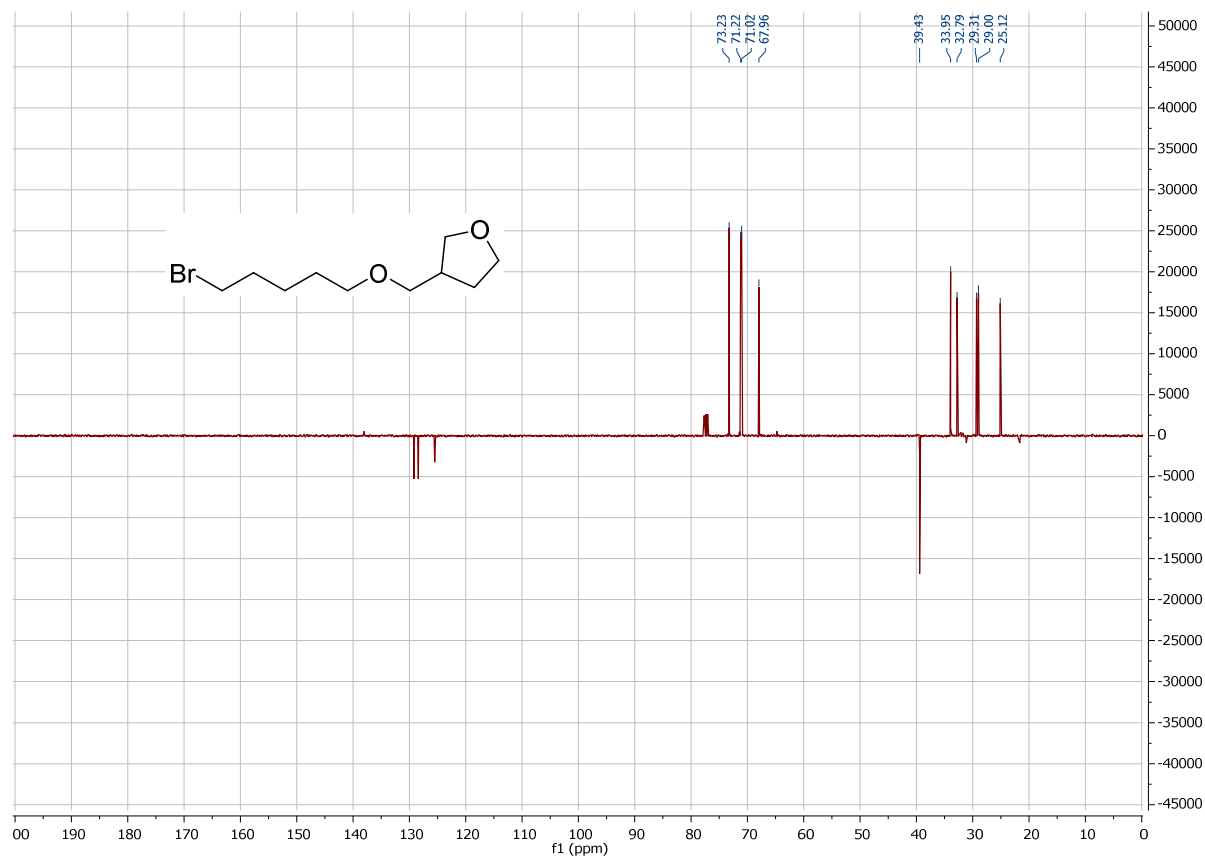







<sup>1</sup>H-NMR and <sup>13</sup>C-NMR of compound B16 in CDCl<sub>3</sub>.

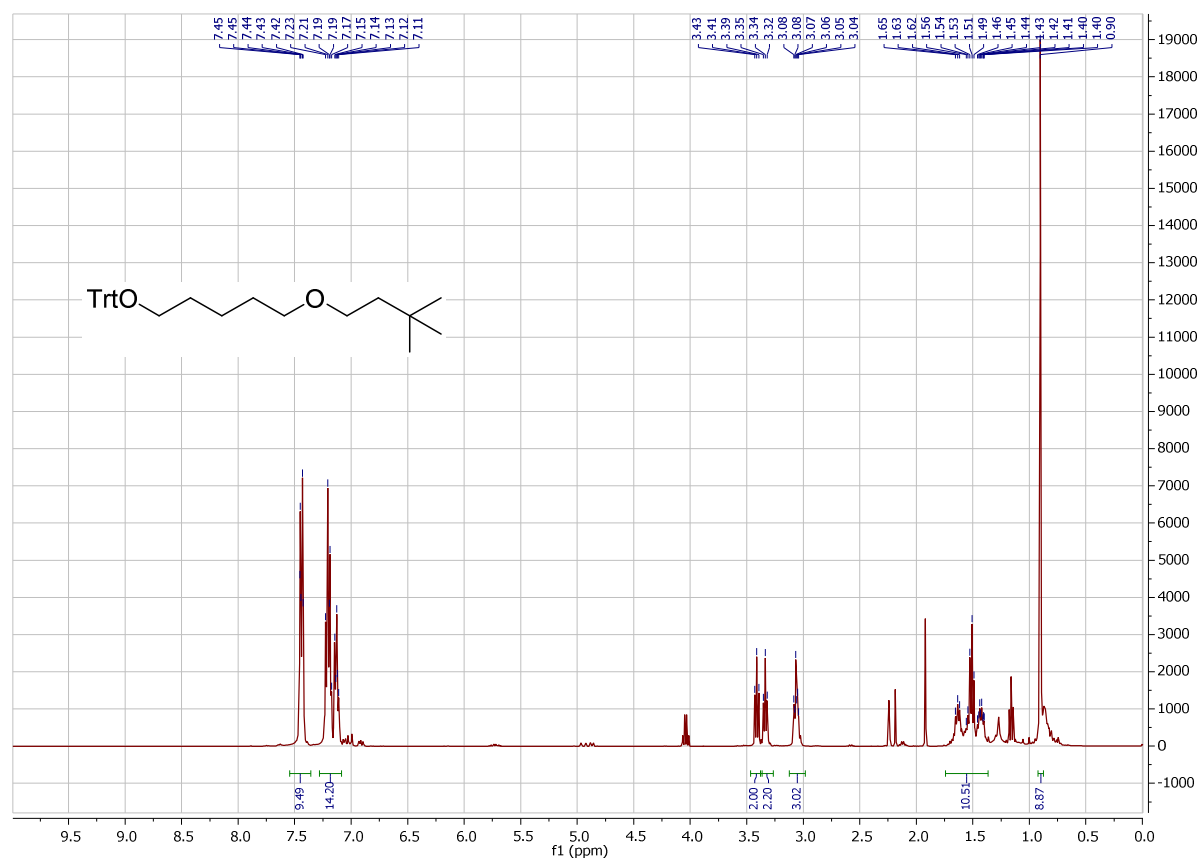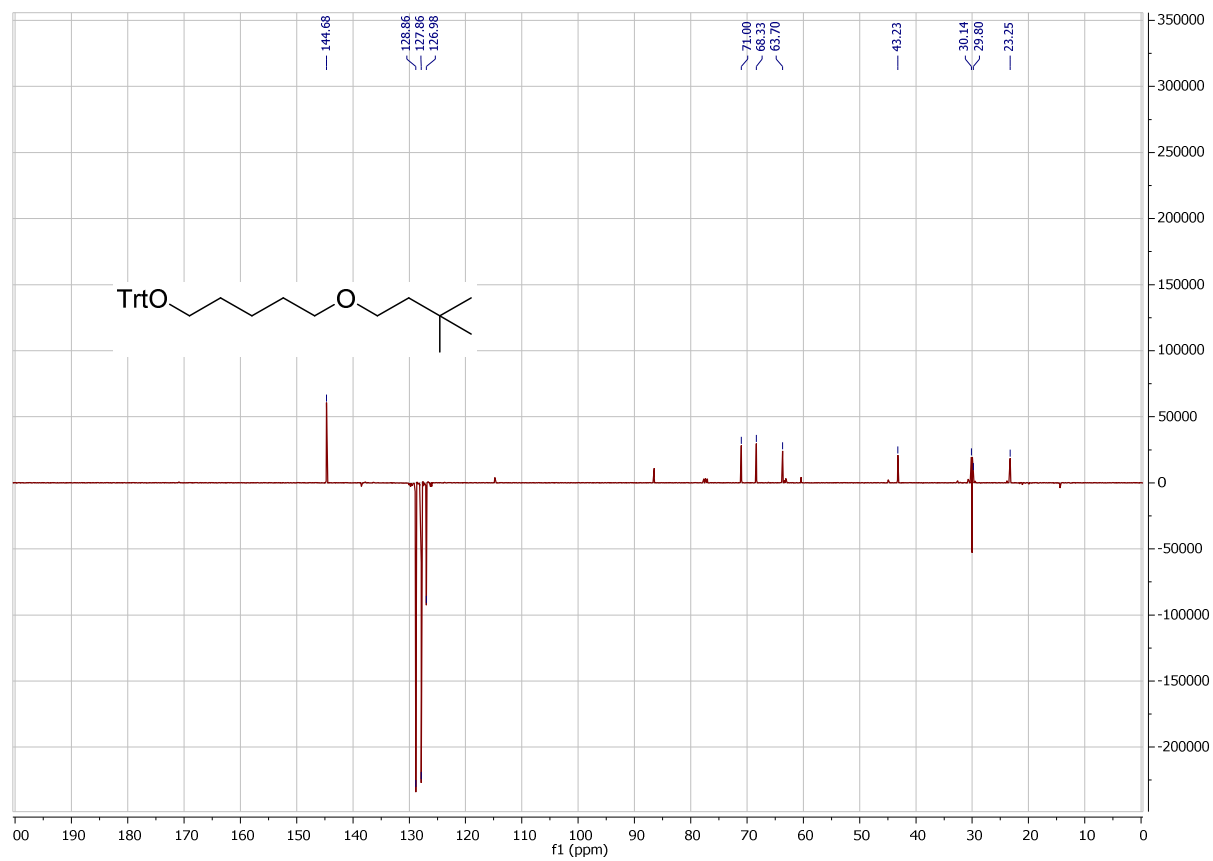

# $^1\text{H-NMR}$ and $^{13}\text{C-NMR}$ of compound B17 in $\text{CDCl}_3$ .

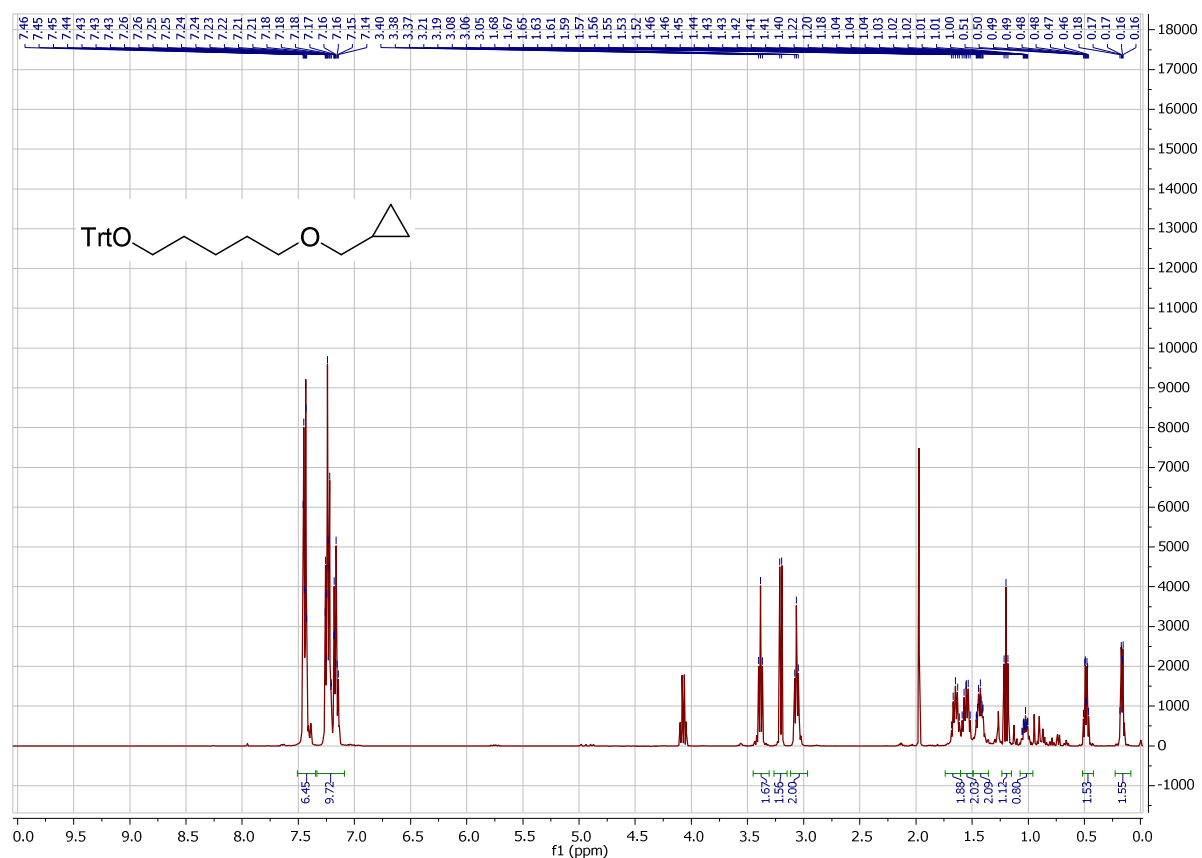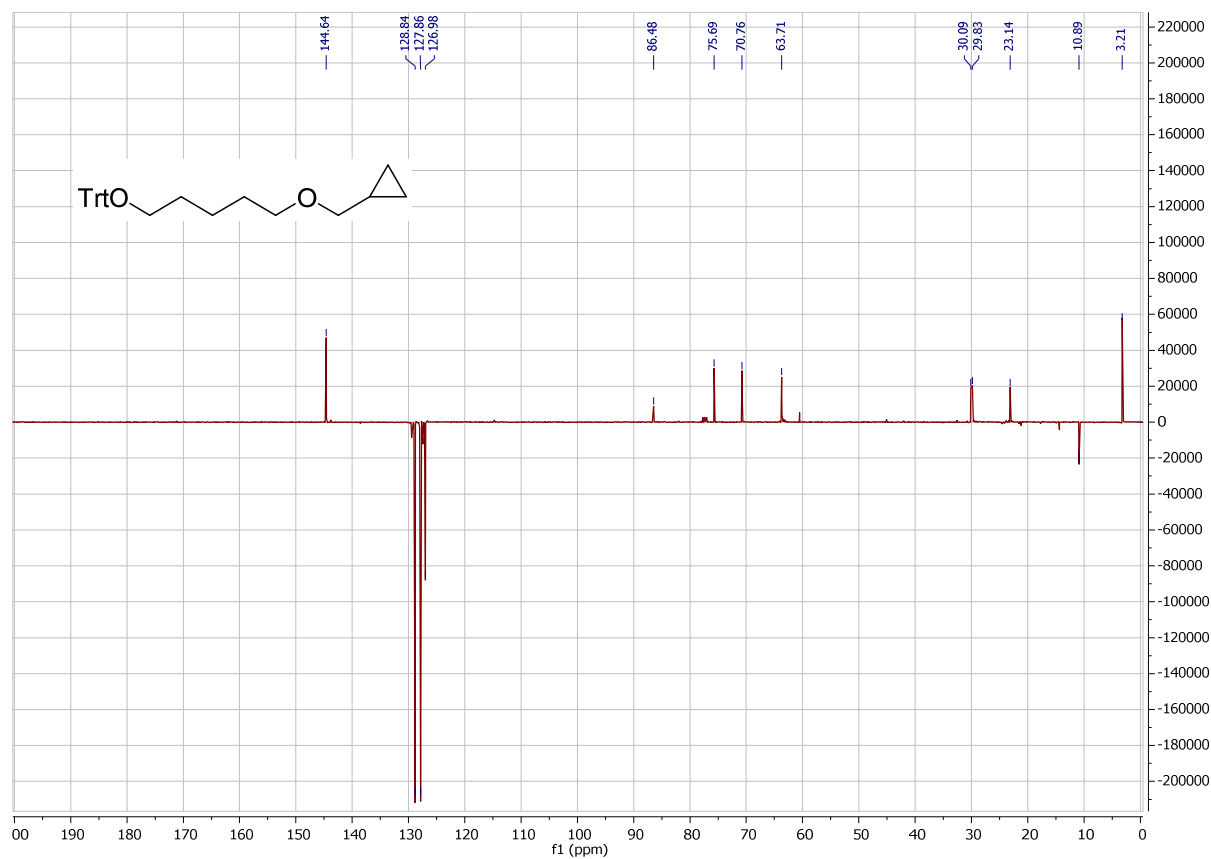

# $^1\text{H-NMR}$ and $^{13}\text{C-NMR}$ of compound B18 in $\text{CDCl}_3$ .

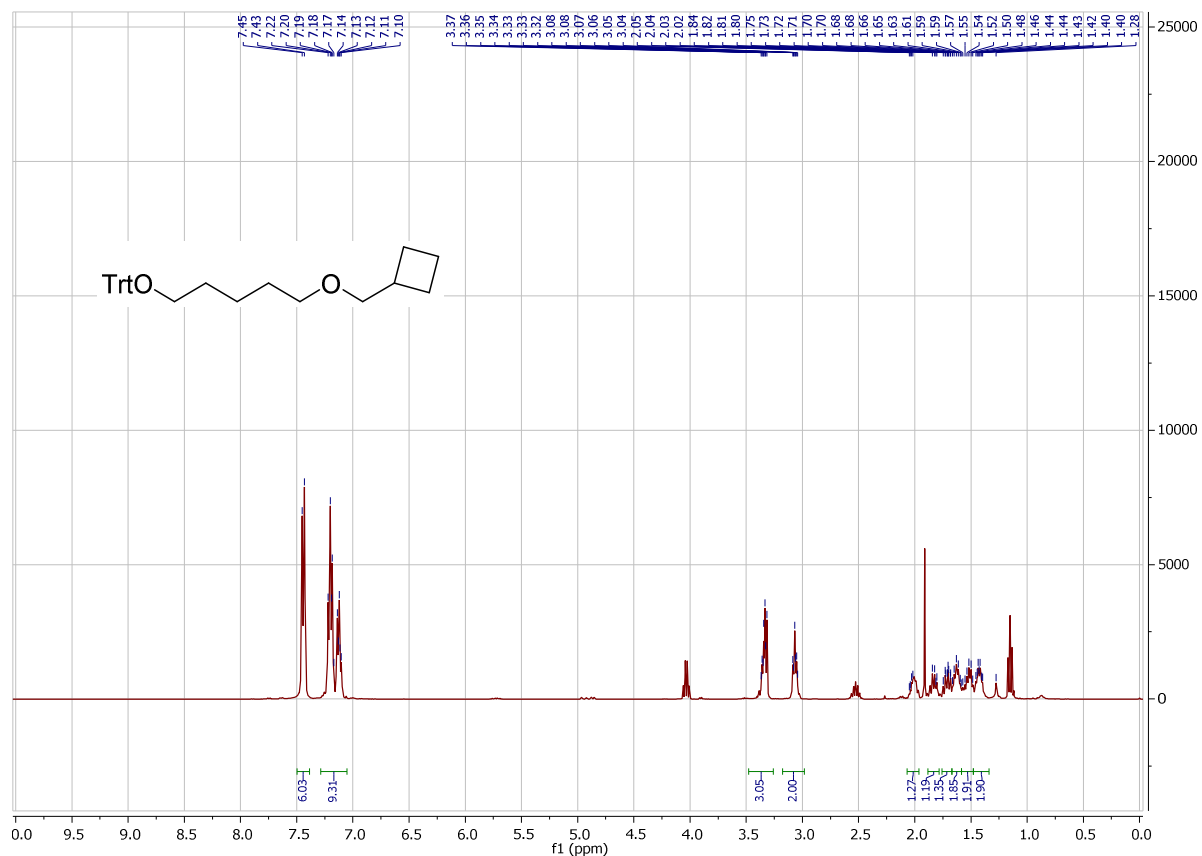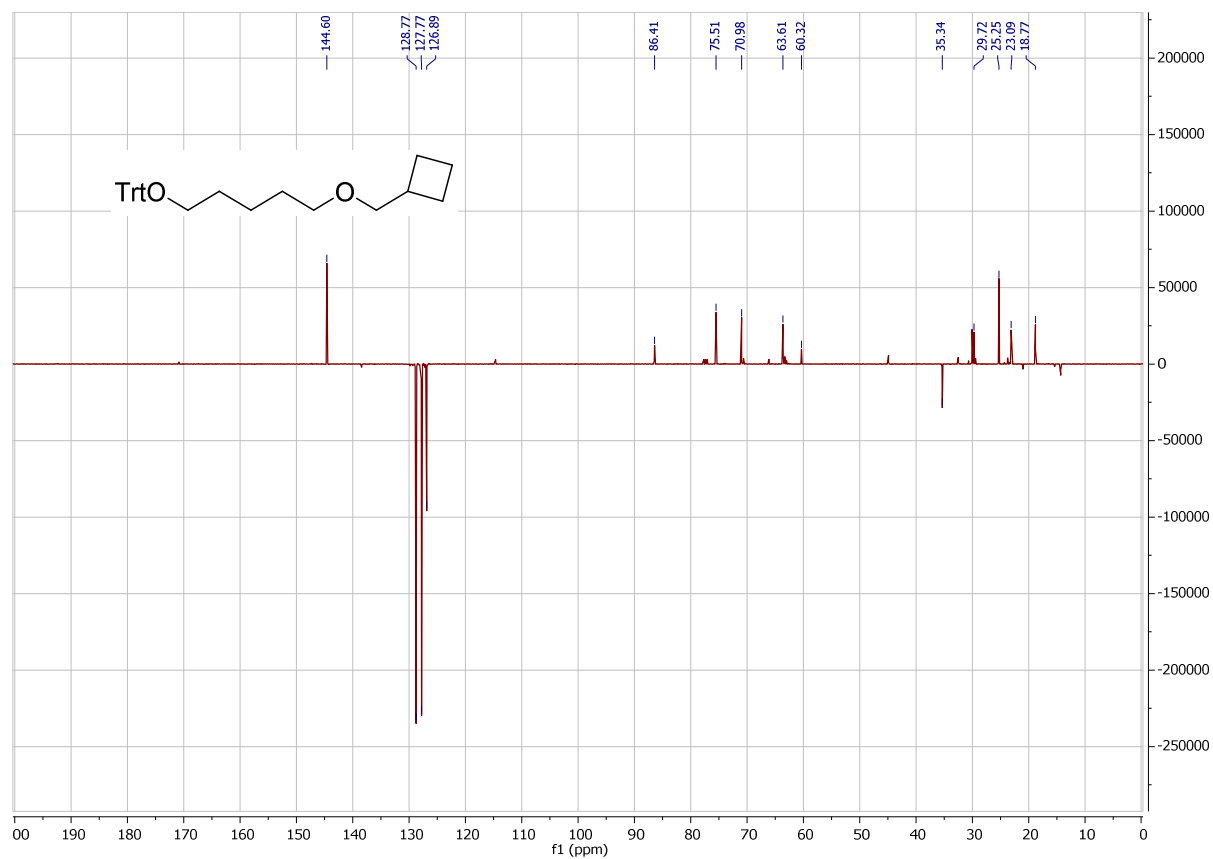



# $^1\text{H-NMR}$ and $^{13}\text{C-NMR}$ of compound B20 in $\text{CDCl}_3$ .

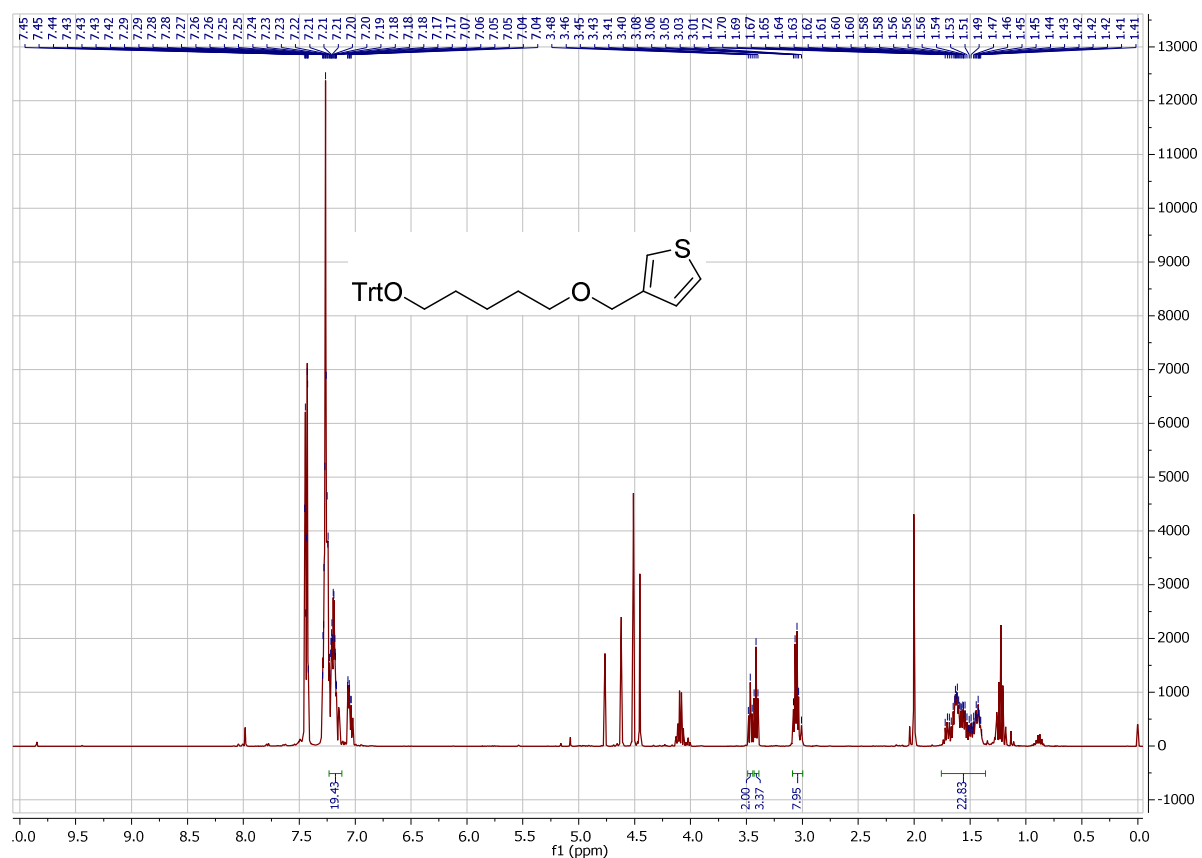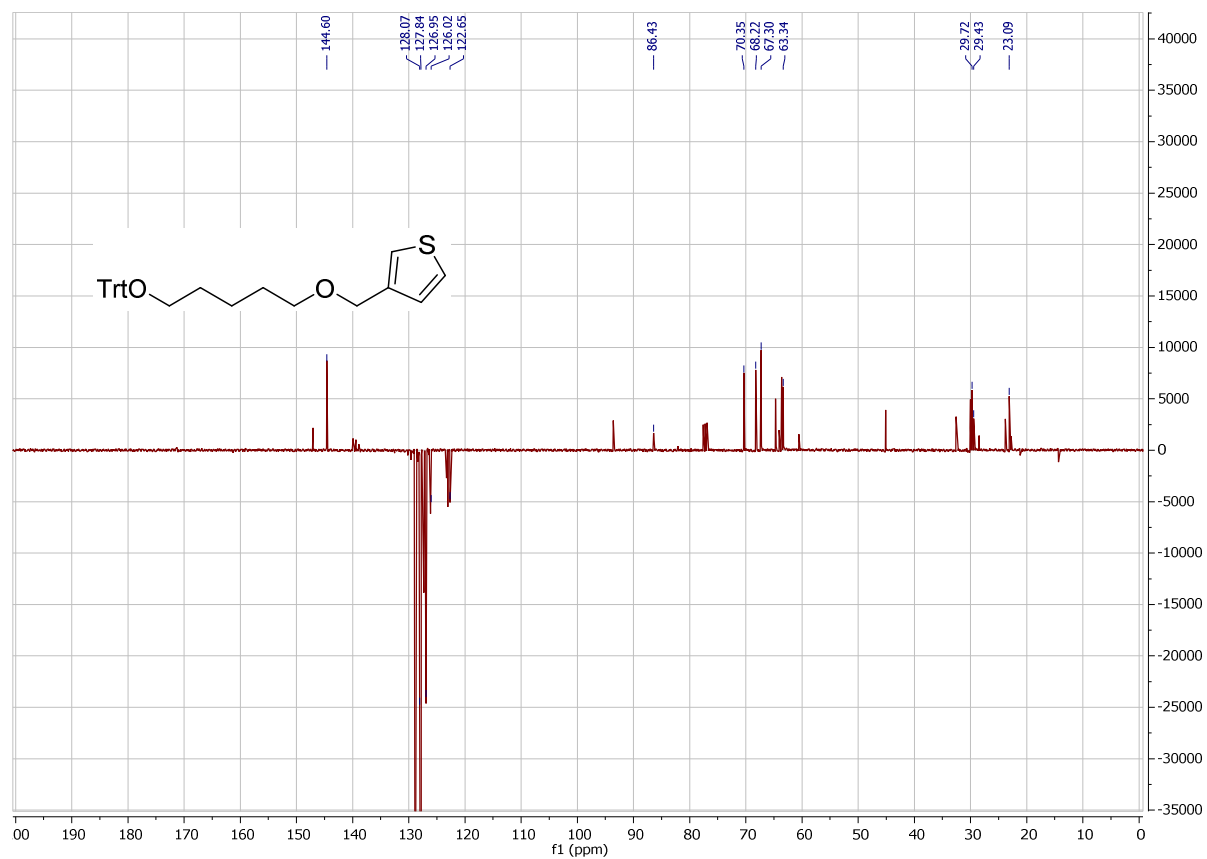

**$^1\text{H-NMR}$  and  $^{13}\text{C-NMR}$  of compound B21 in  $\text{CDCl}_3$ .**

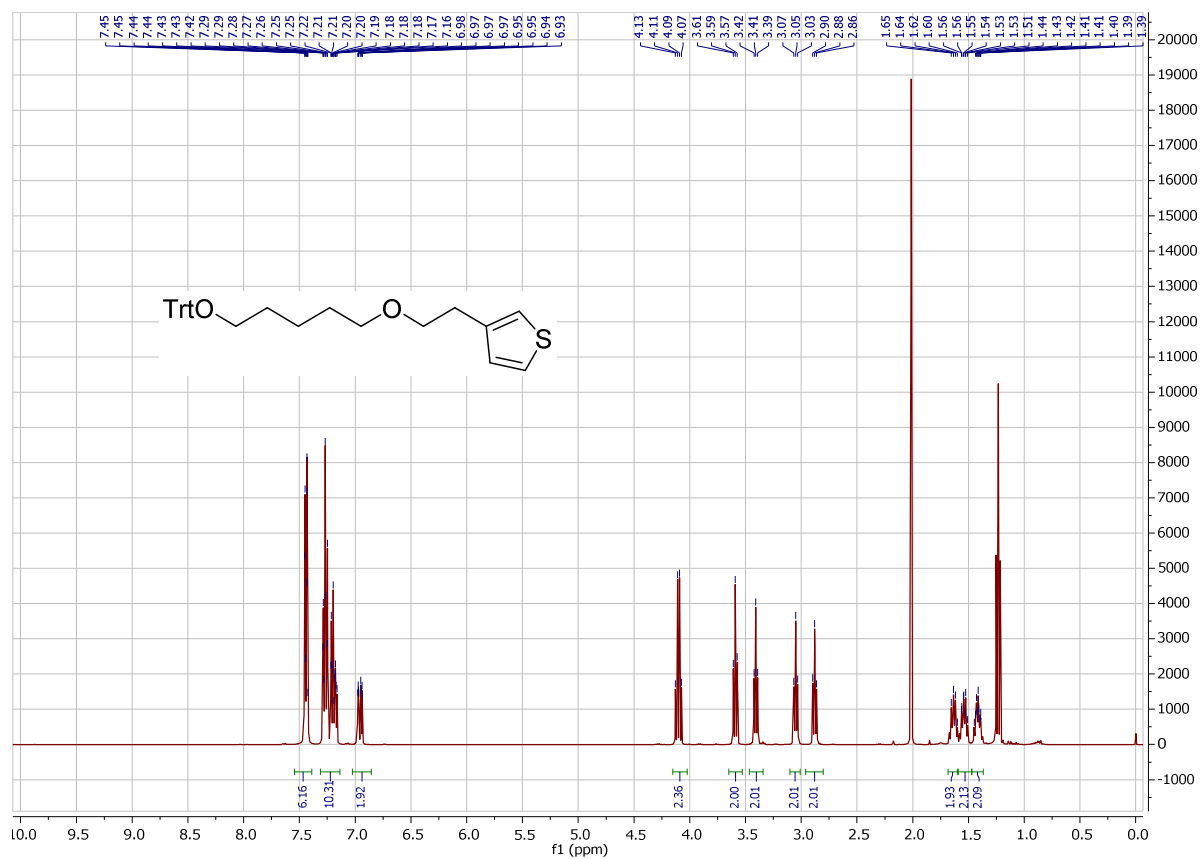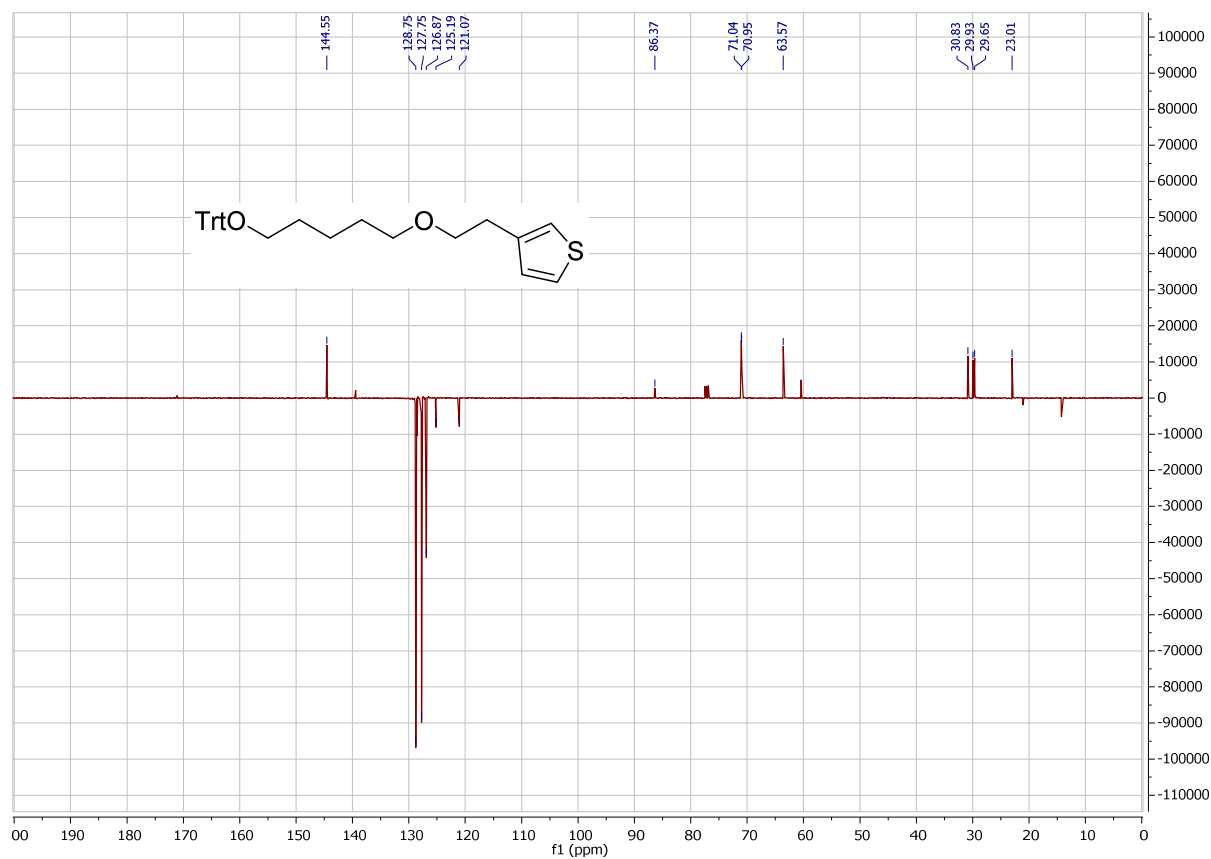



# $^1\text{H-NMR}$ and $^{13}\text{C-NMR}$ of compound B22 in $\text{CDCl}_3$ .

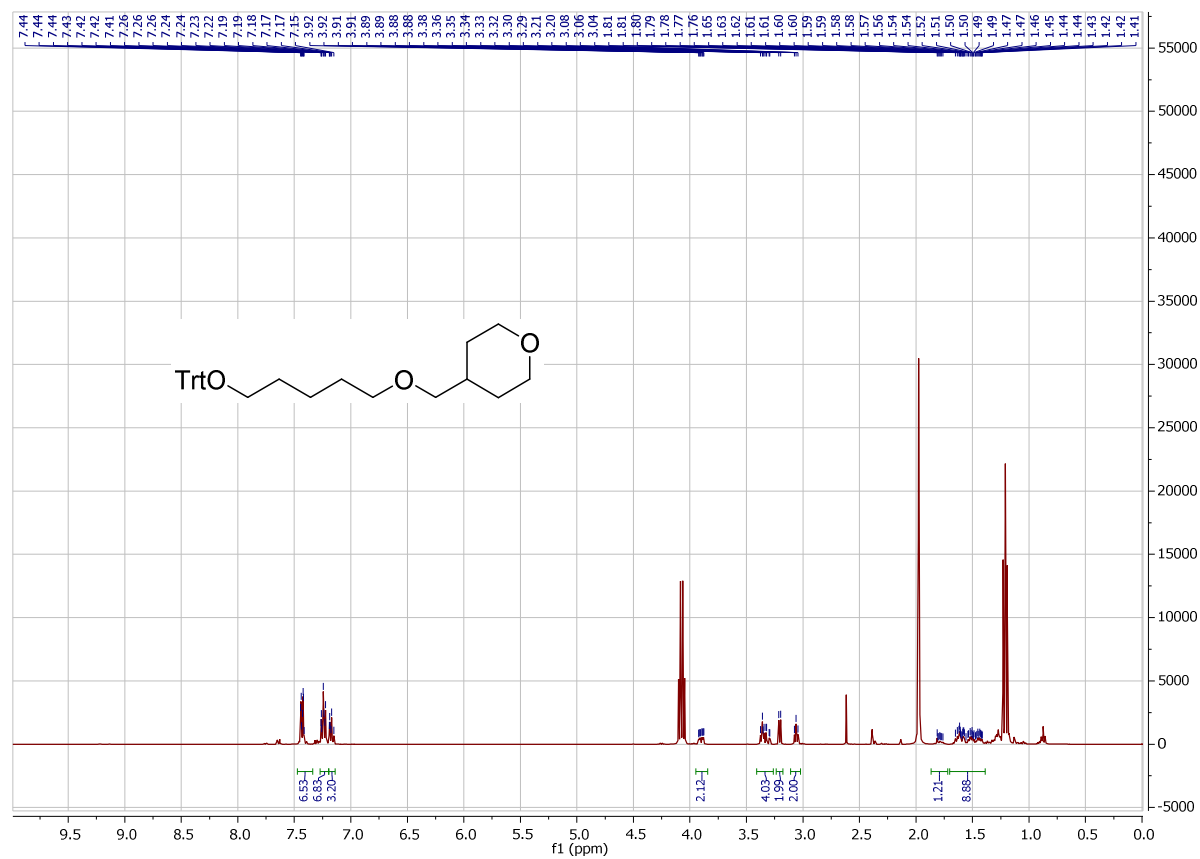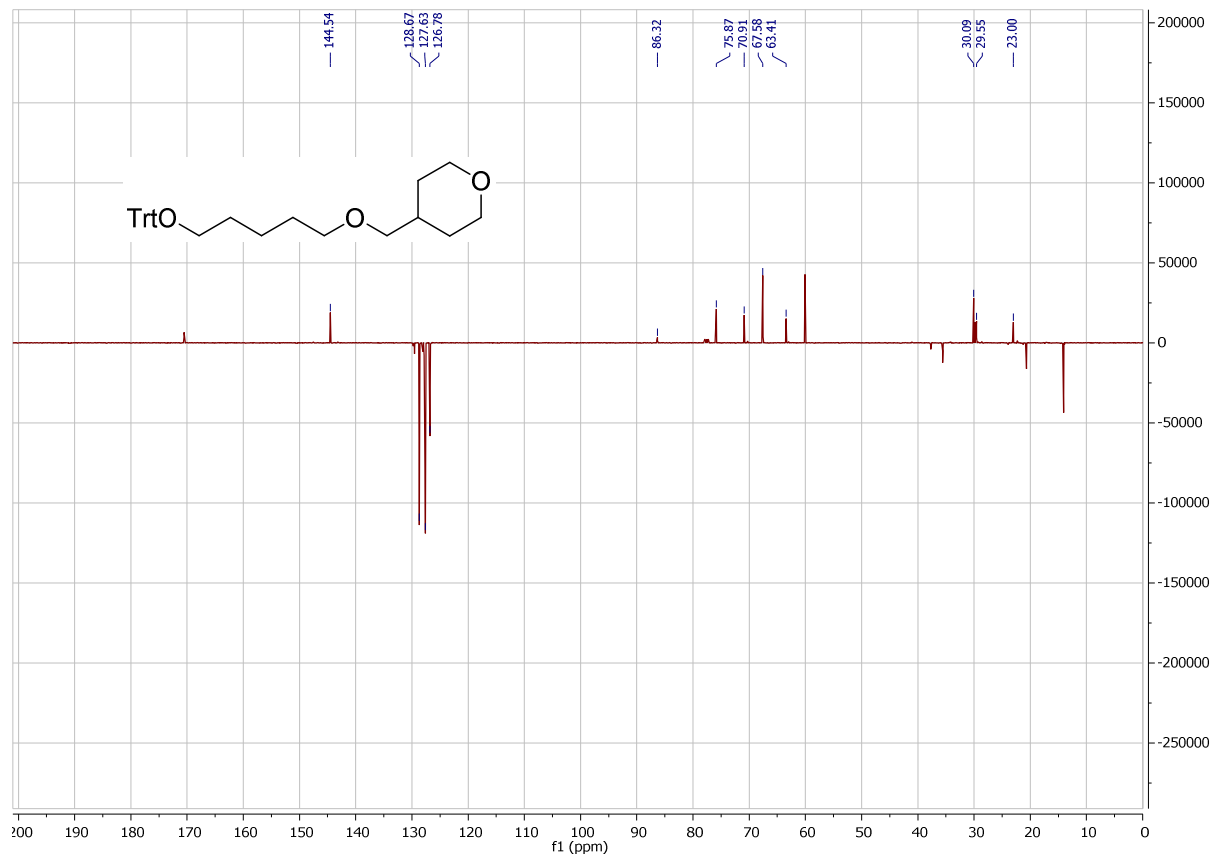



**<sup>1</sup>H-NMR and <sup>13</sup>C-NMR of compound B24 in CDCl<sub>3</sub>.**

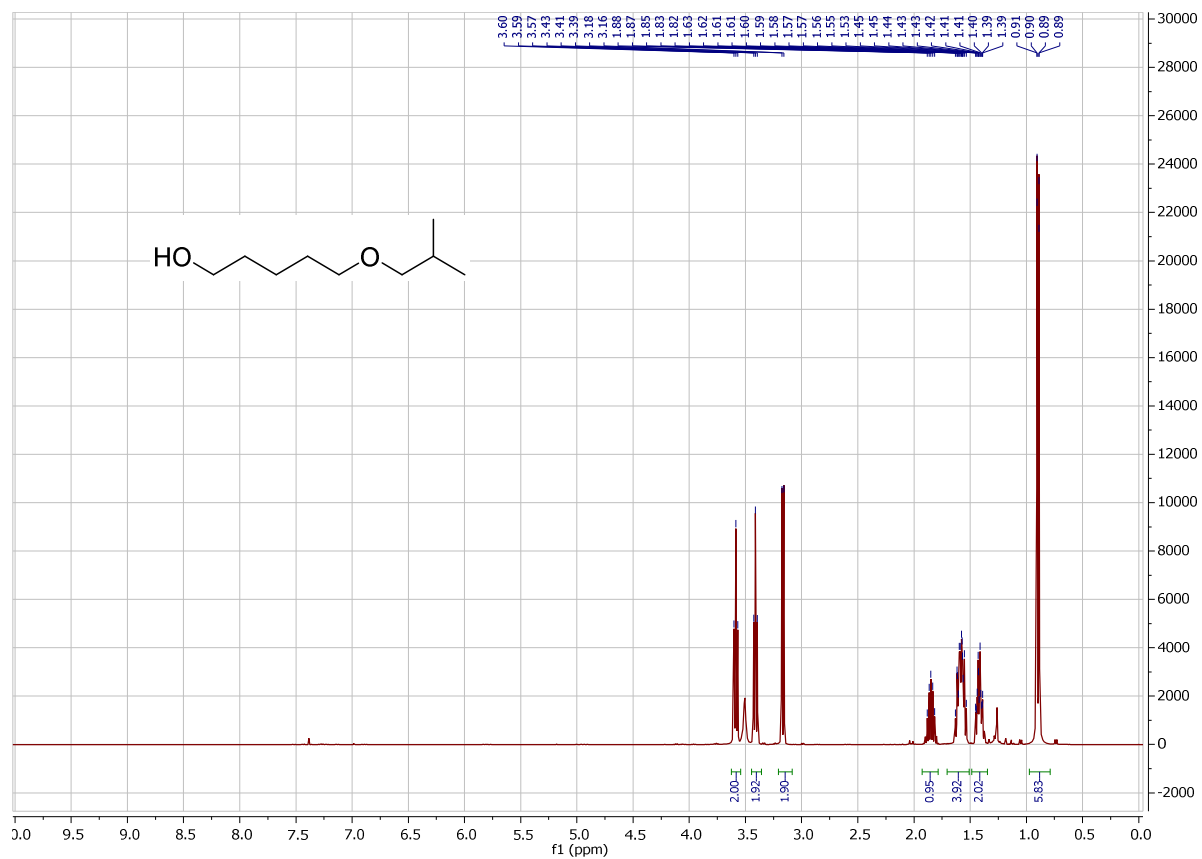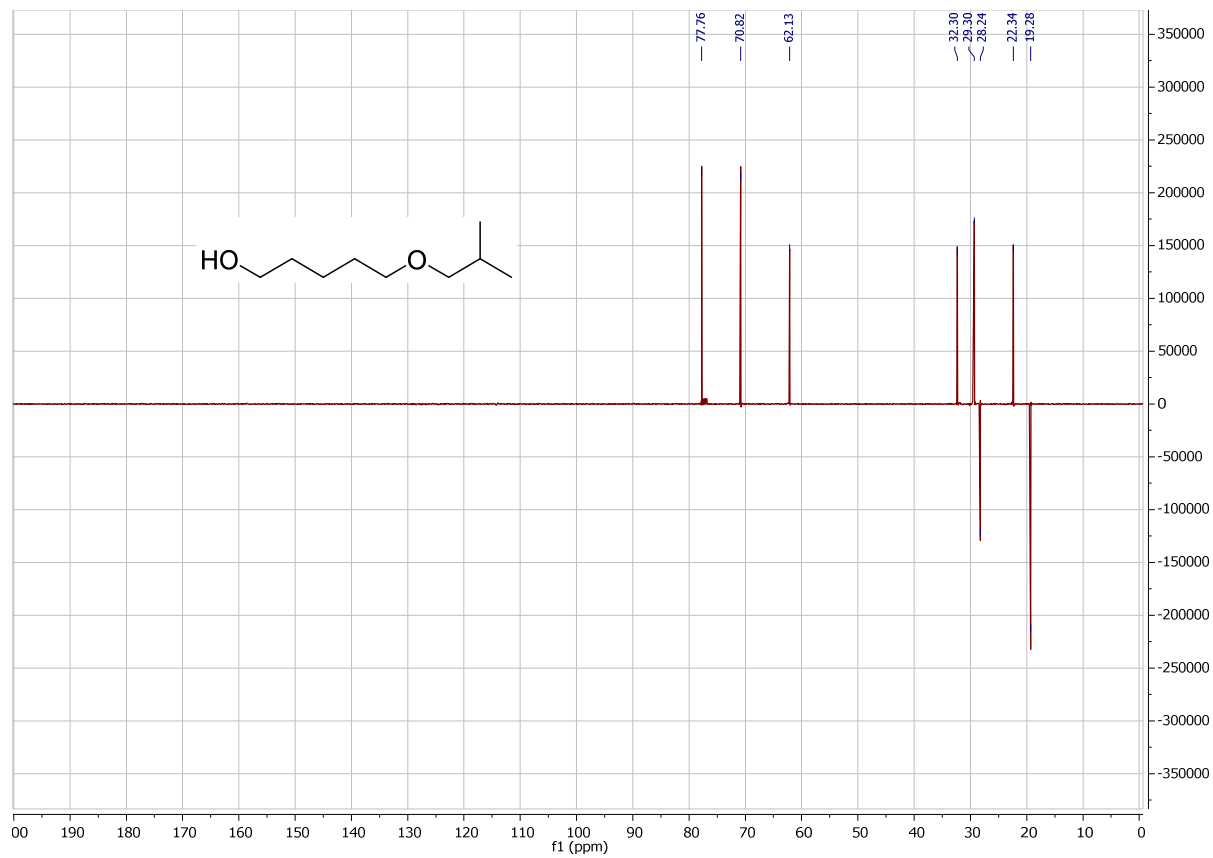

<sup>1</sup>H-NMR and <sup>13</sup>C-NMR of compound B25 in CDCl<sub>3</sub>.

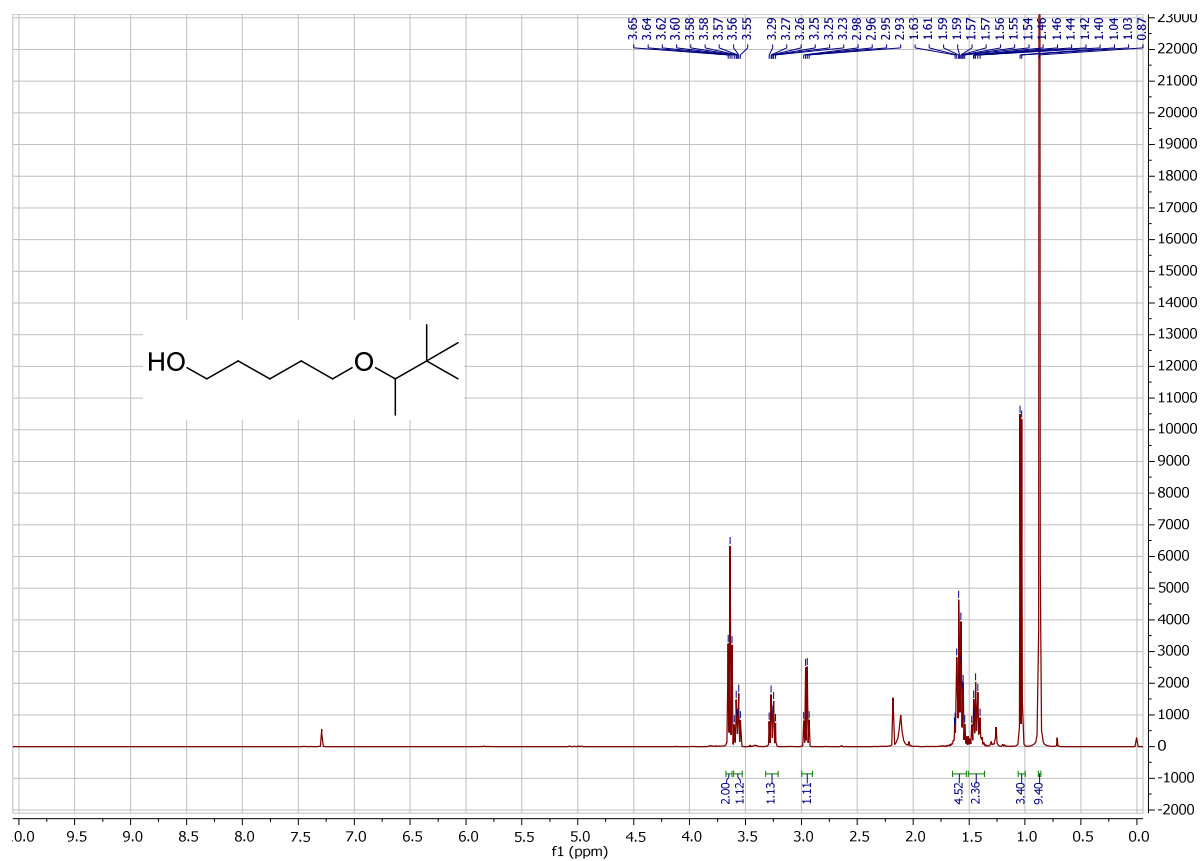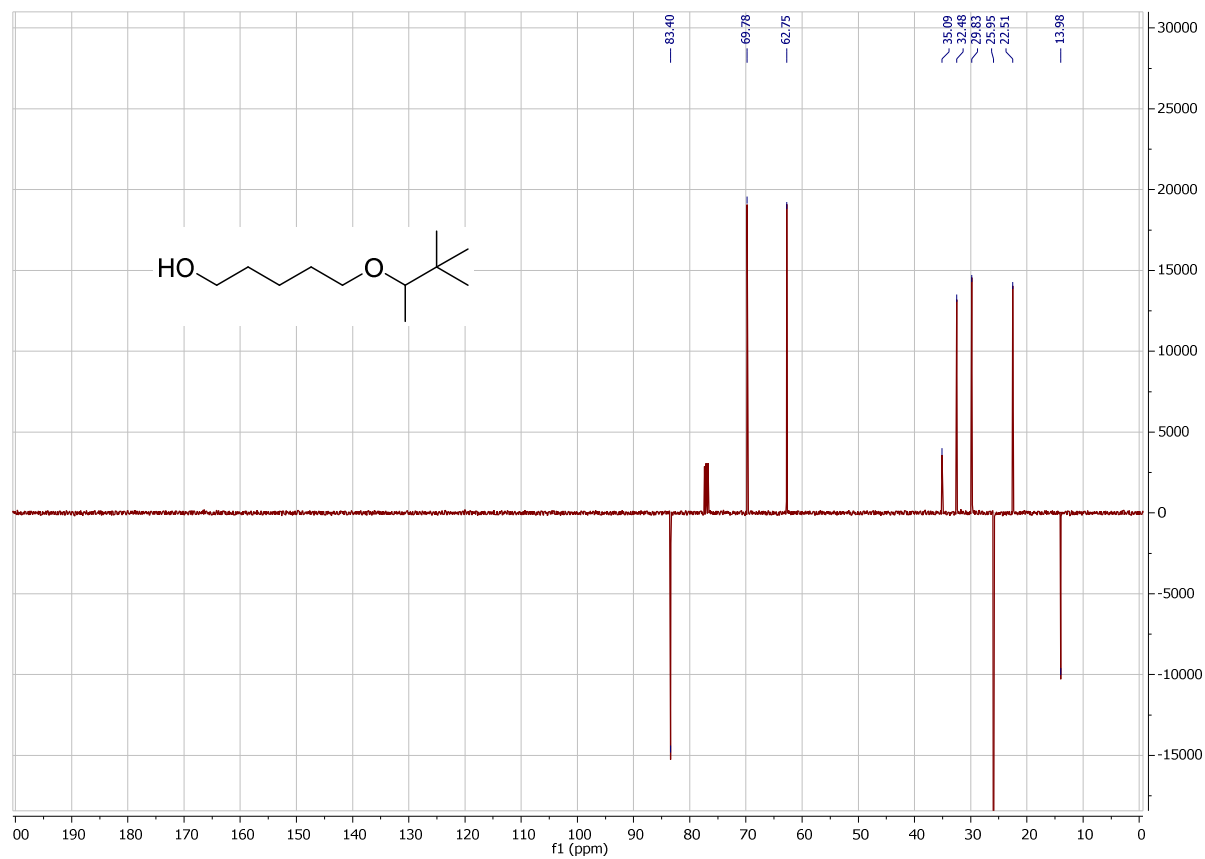

<sup>1</sup>H-NMR and <sup>13</sup>C-NMR of compound B26 in CDCl<sub>3</sub>.

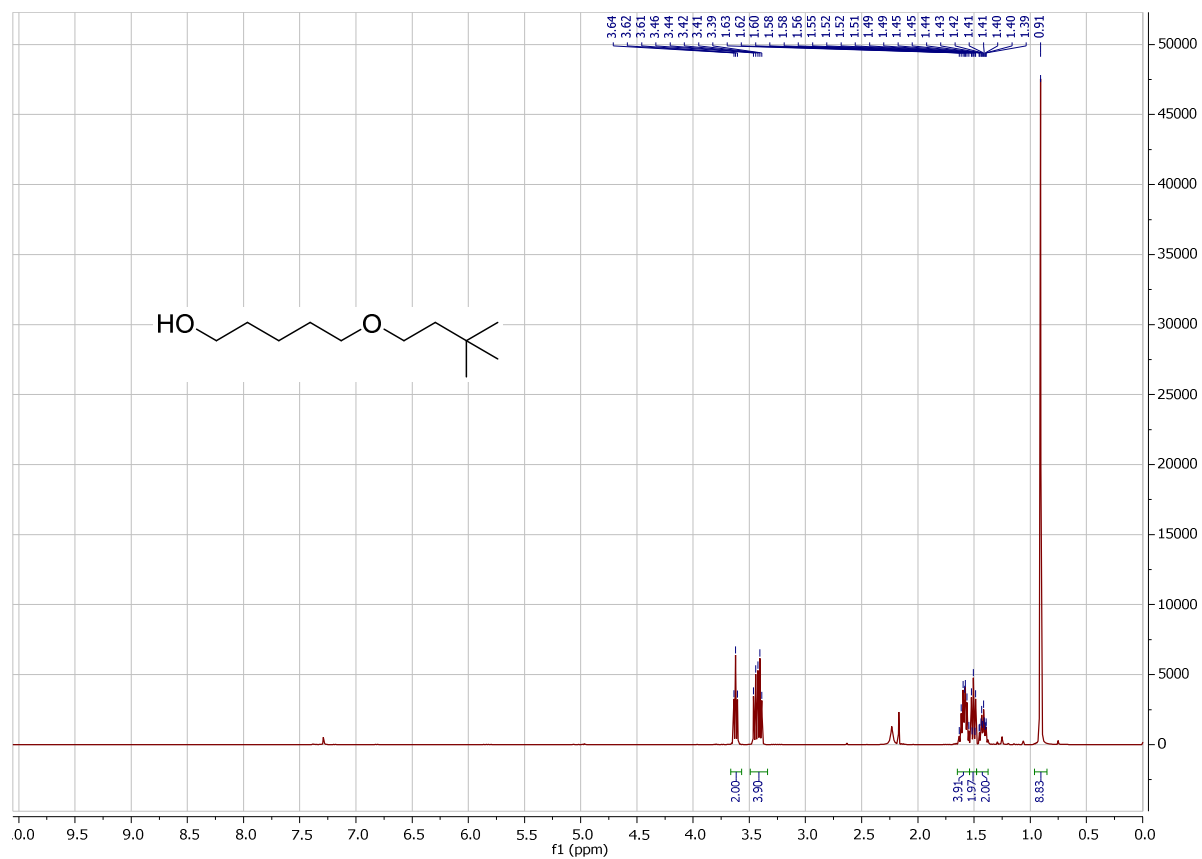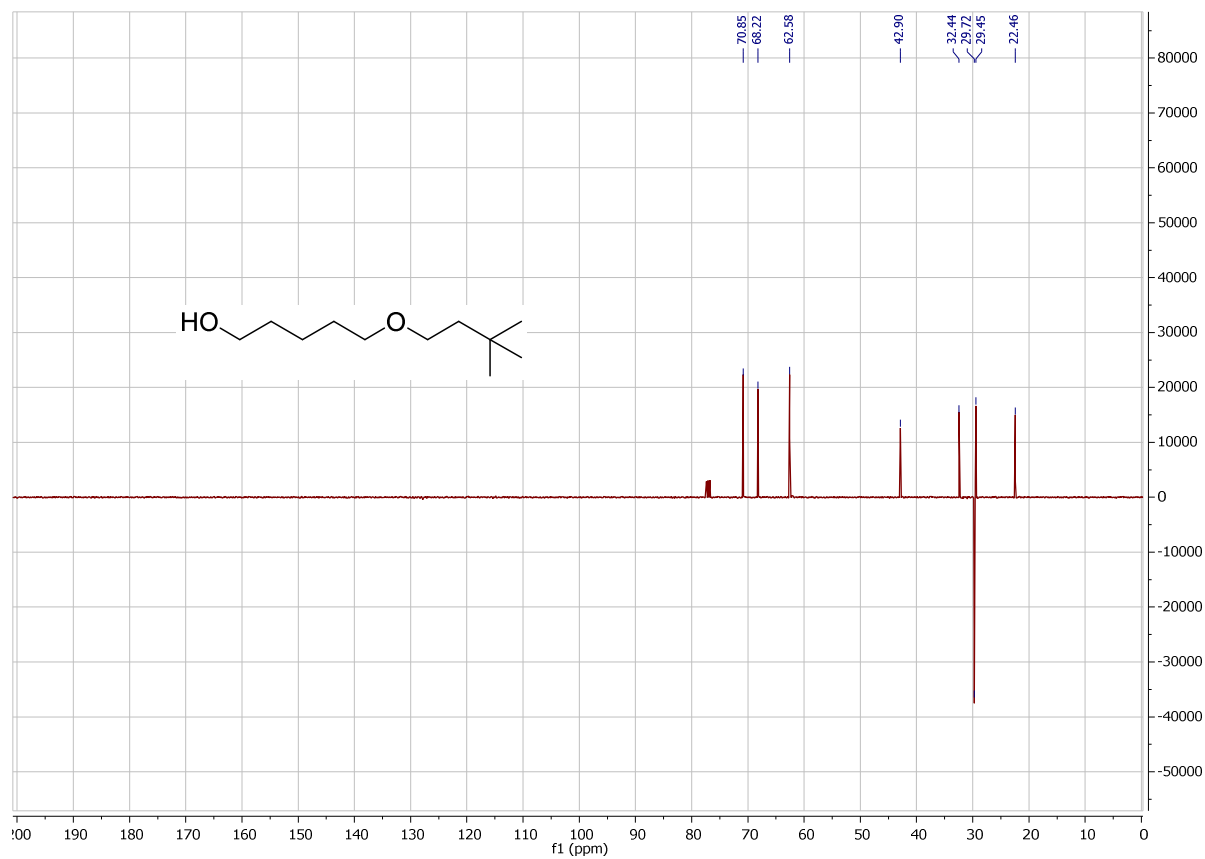

# $^1\text{H-NMR}$ and $^{13}\text{C-NMR}$ of compound B27 in $\text{CDCl}_3$ .

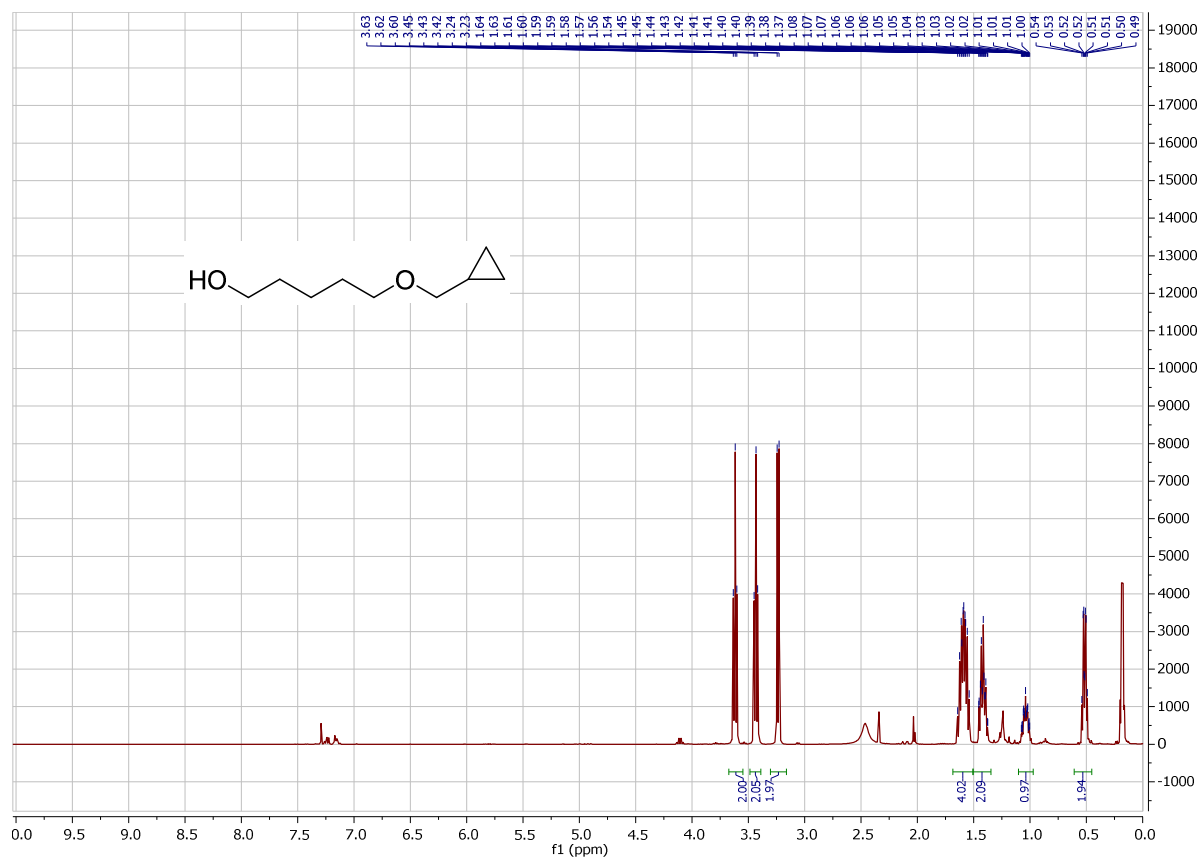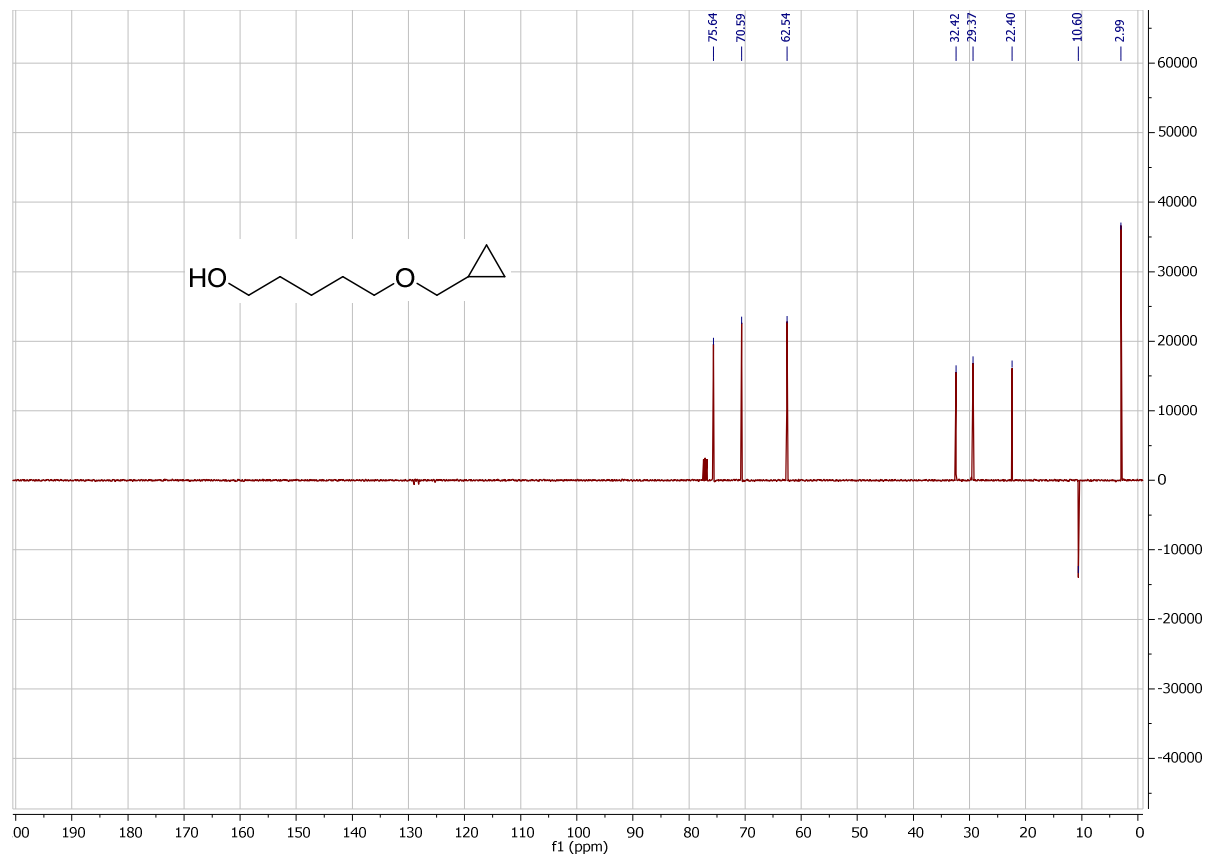

<sup>1</sup>H-NMR and <sup>13</sup>C-NMR of compound B28 in CDCl<sub>3</sub>.

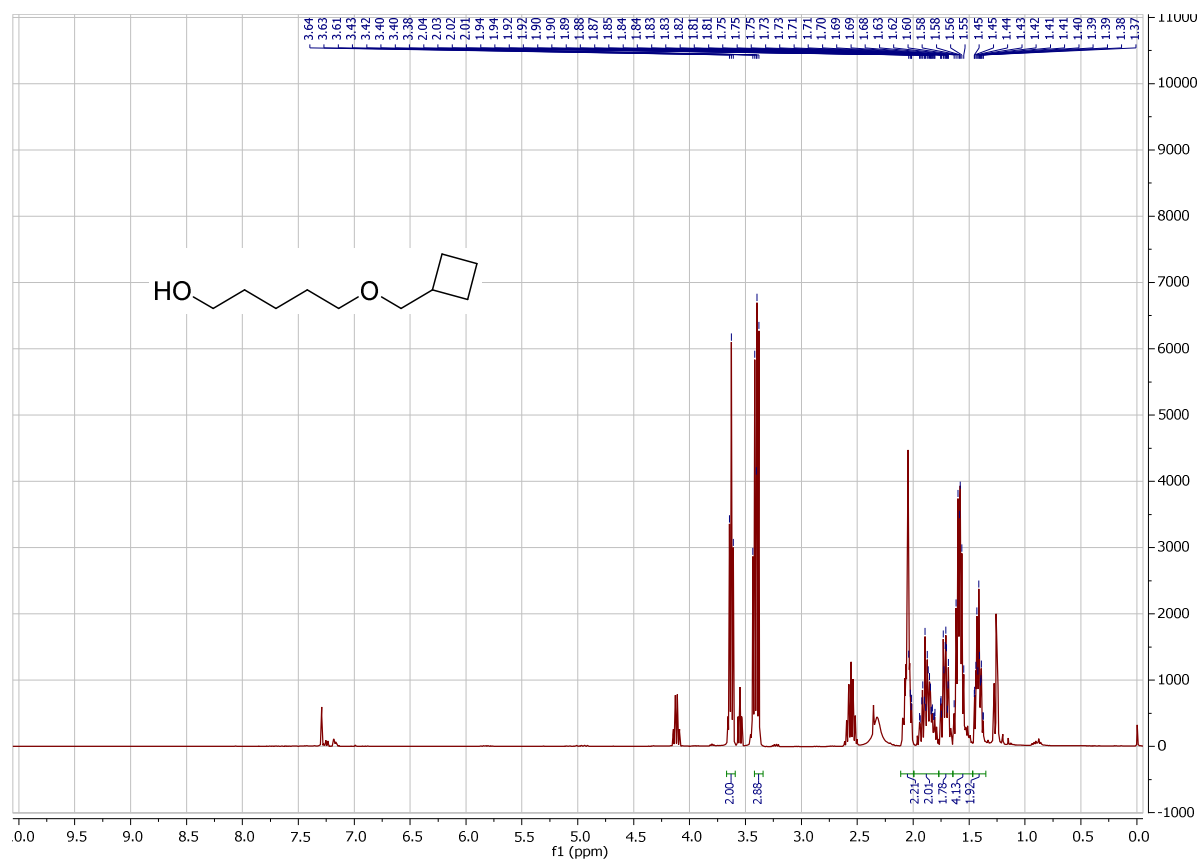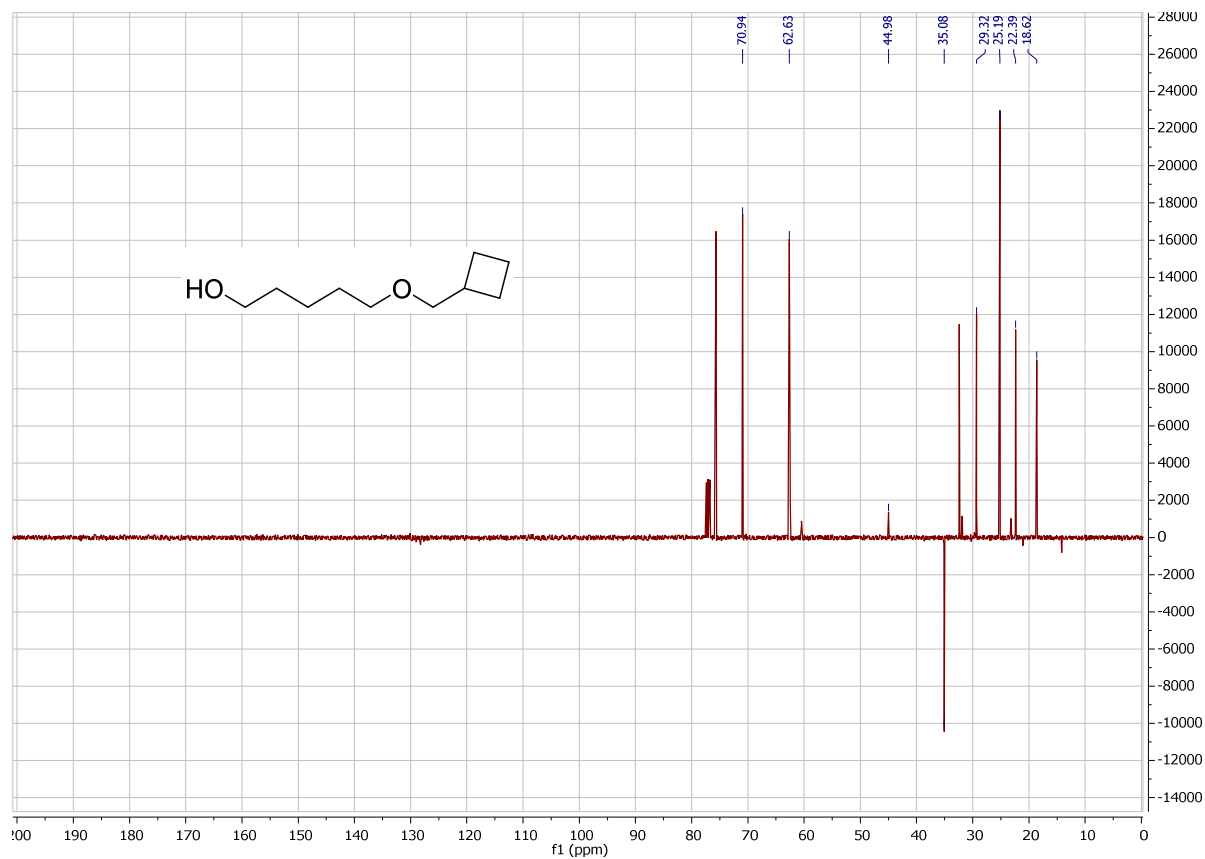

<sup>1</sup>H-NMR and <sup>13</sup>C-NMR of compound B29 in CDCl<sub>3</sub>.

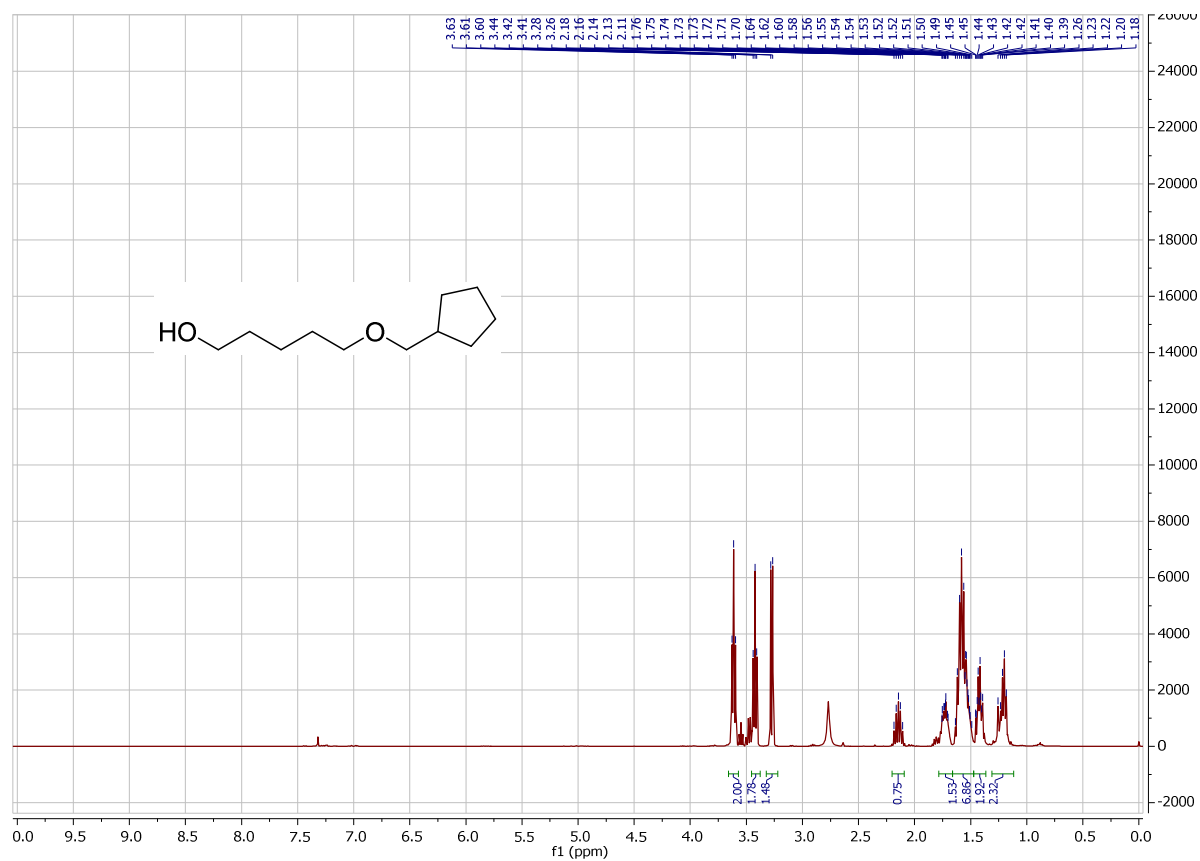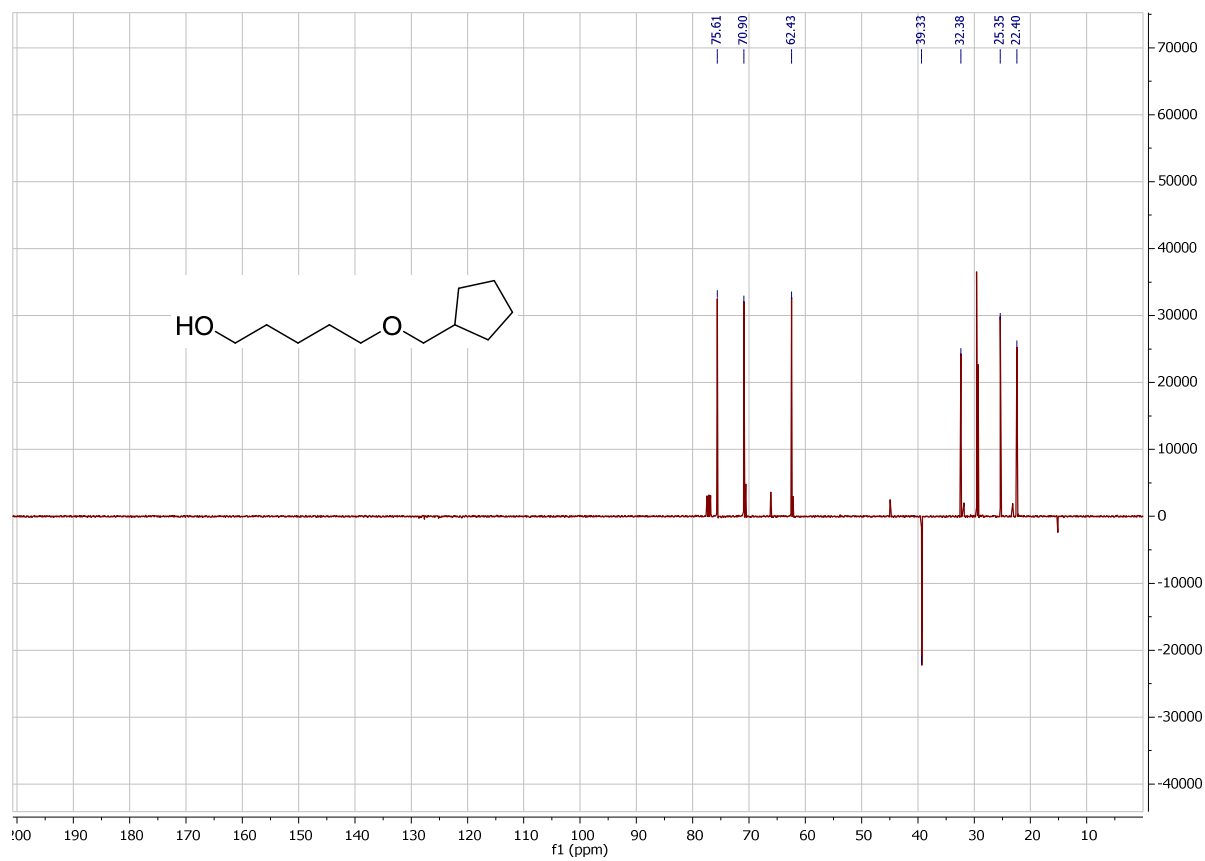



# $^1\text{H-NMR}$ and $^{13}\text{C-NMR}$ of compound B30 in $\text{CDCl}_3$ .

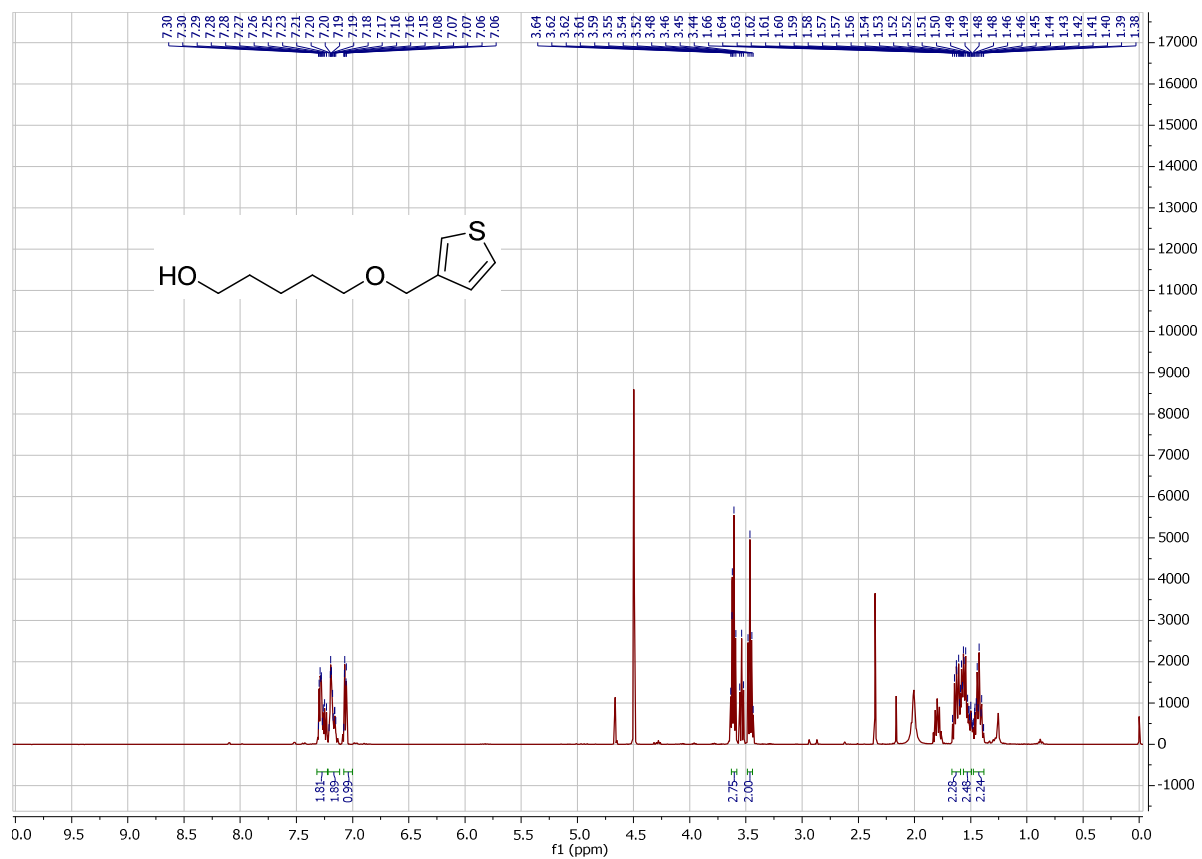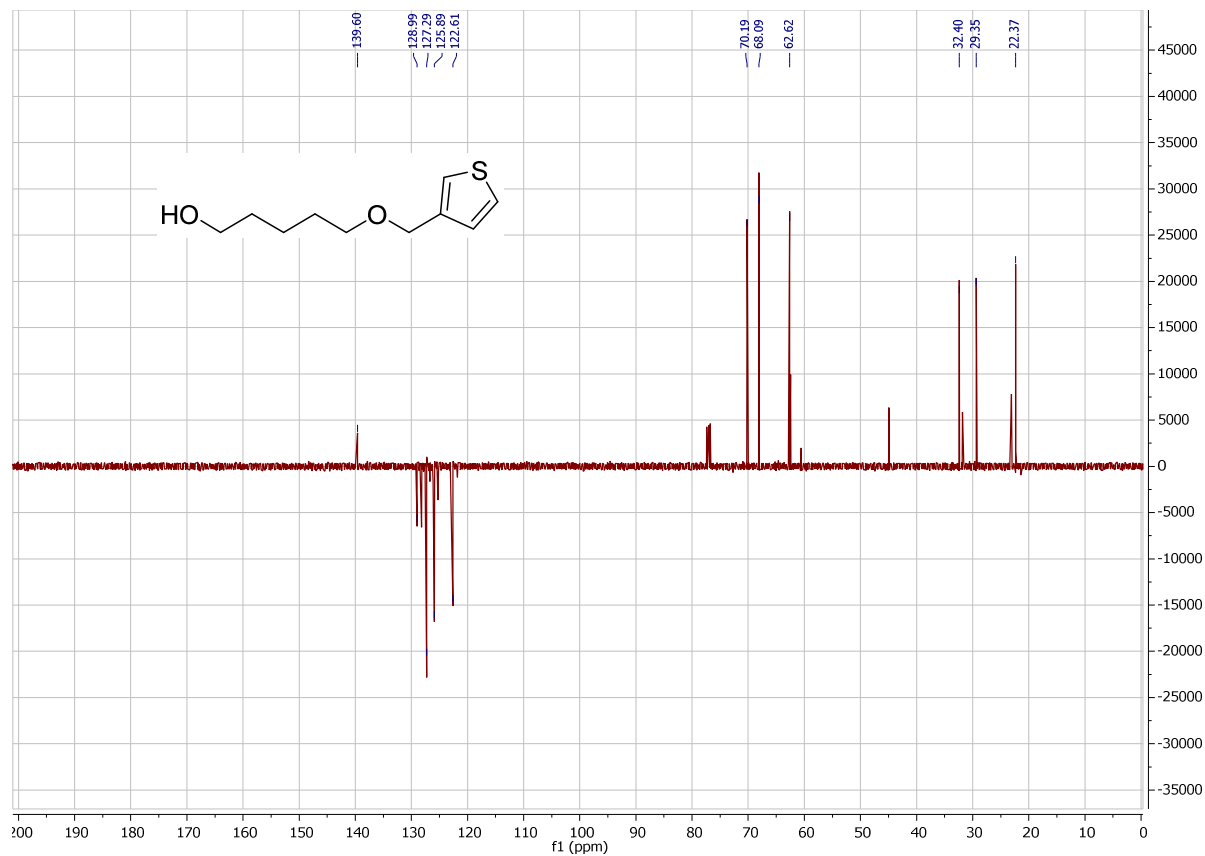

# $^1\text{H-NMR}$ and $^{13}\text{C-NMR}$ of compound B31 in $\text{CDCl}_3$ .

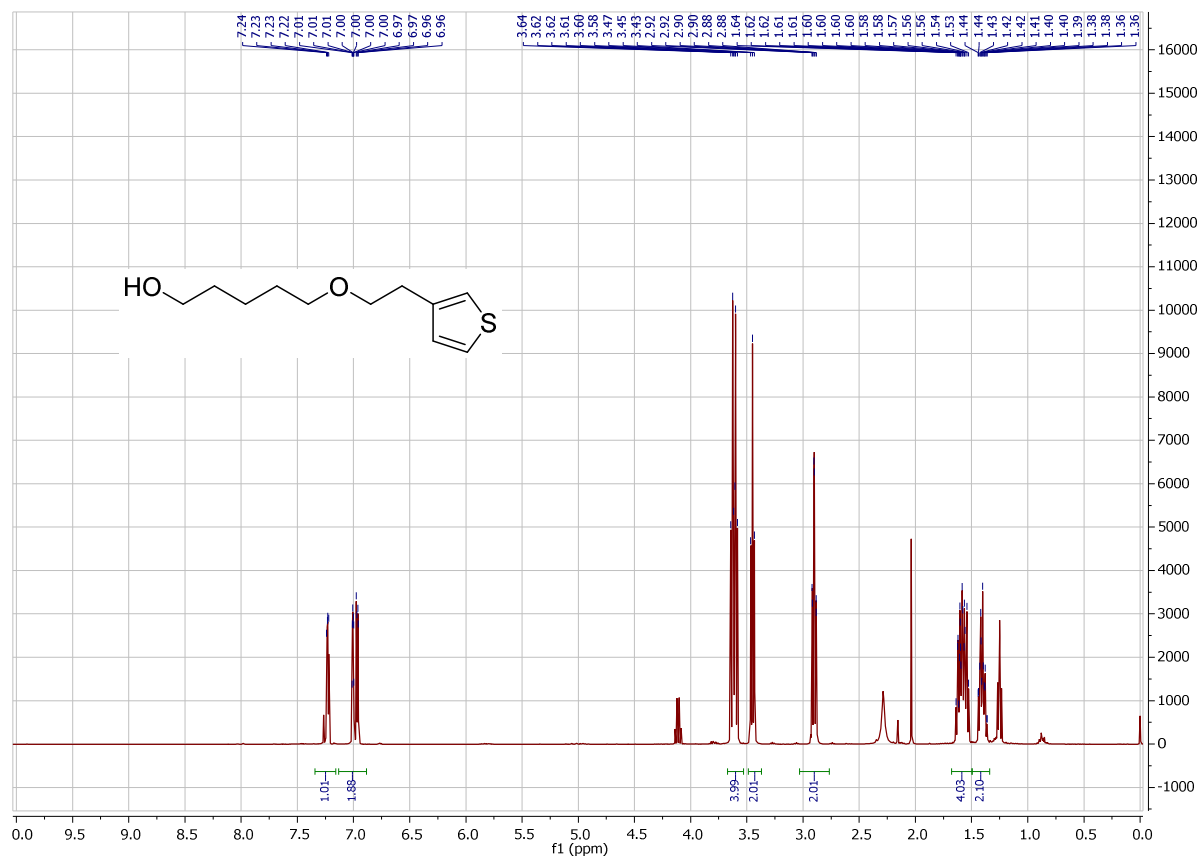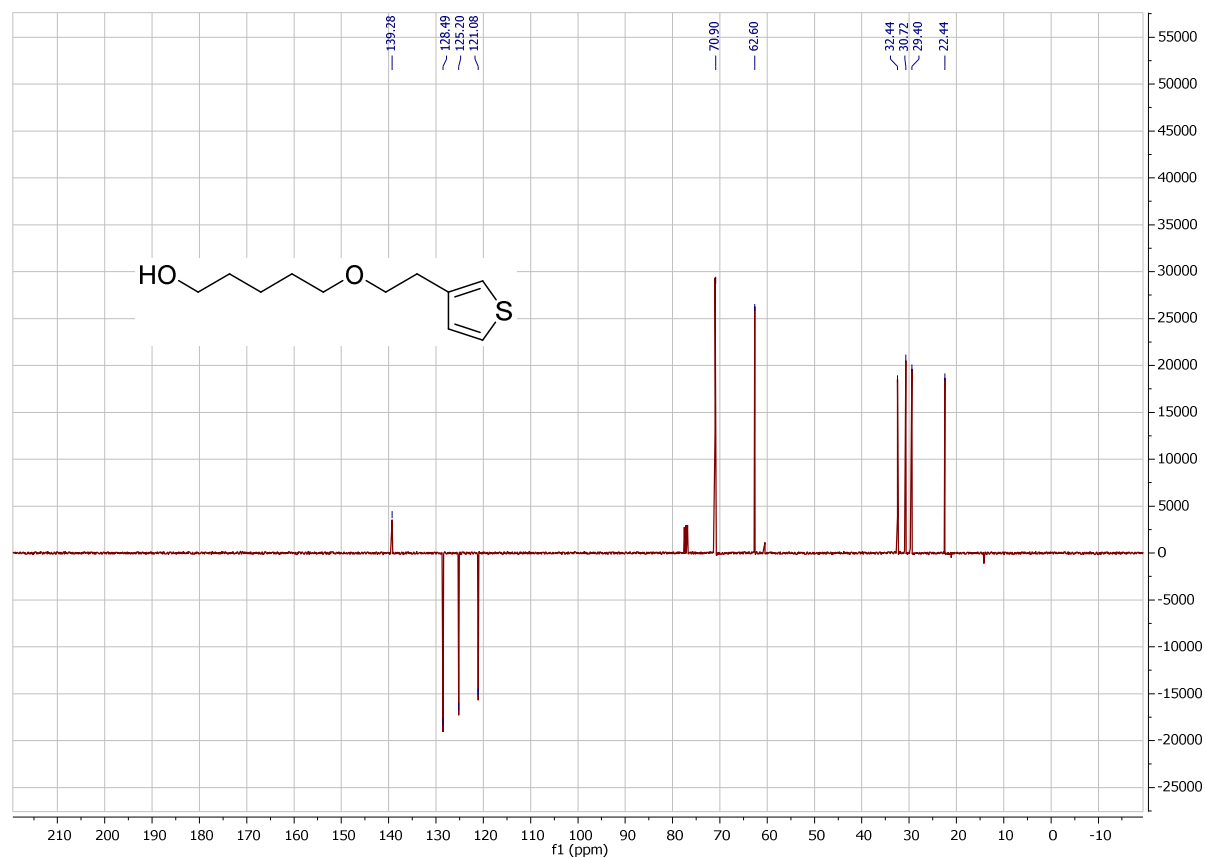

# $^1\text{H-NMR}$ and $^{13}\text{C-NMR}$ of compound B32 in $\text{CDCl}_3$ .

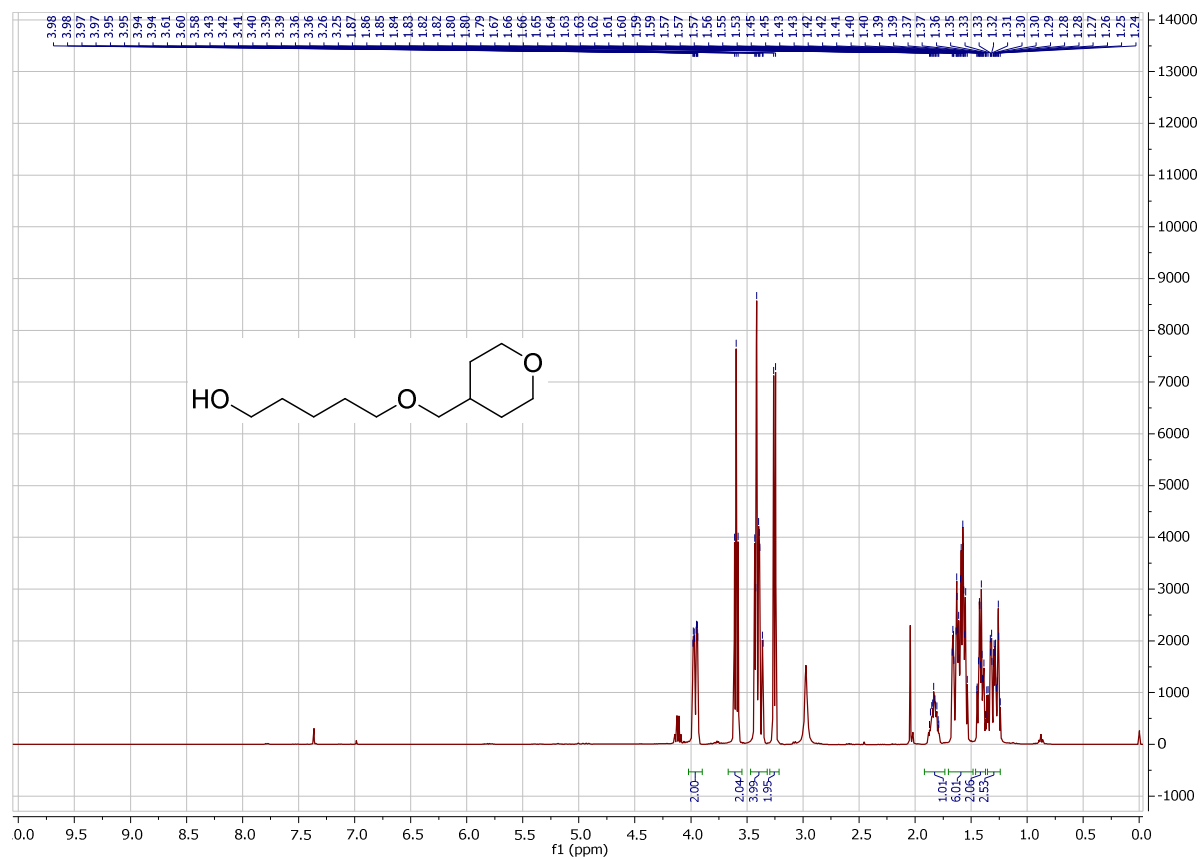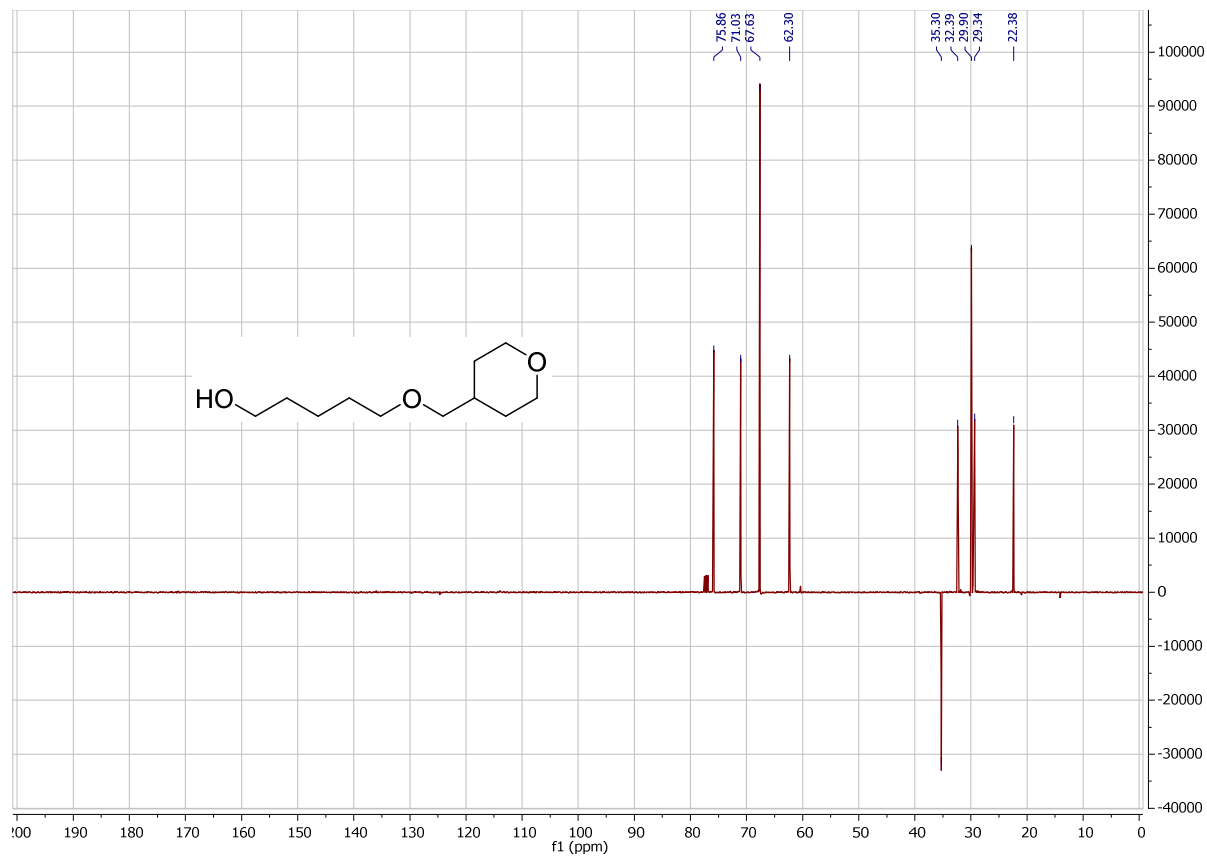

**$^1\text{H-NMR}$  and  $^{13}\text{C-NMR}$  of compound B33 in  $\text{CDCl}_3$ .**

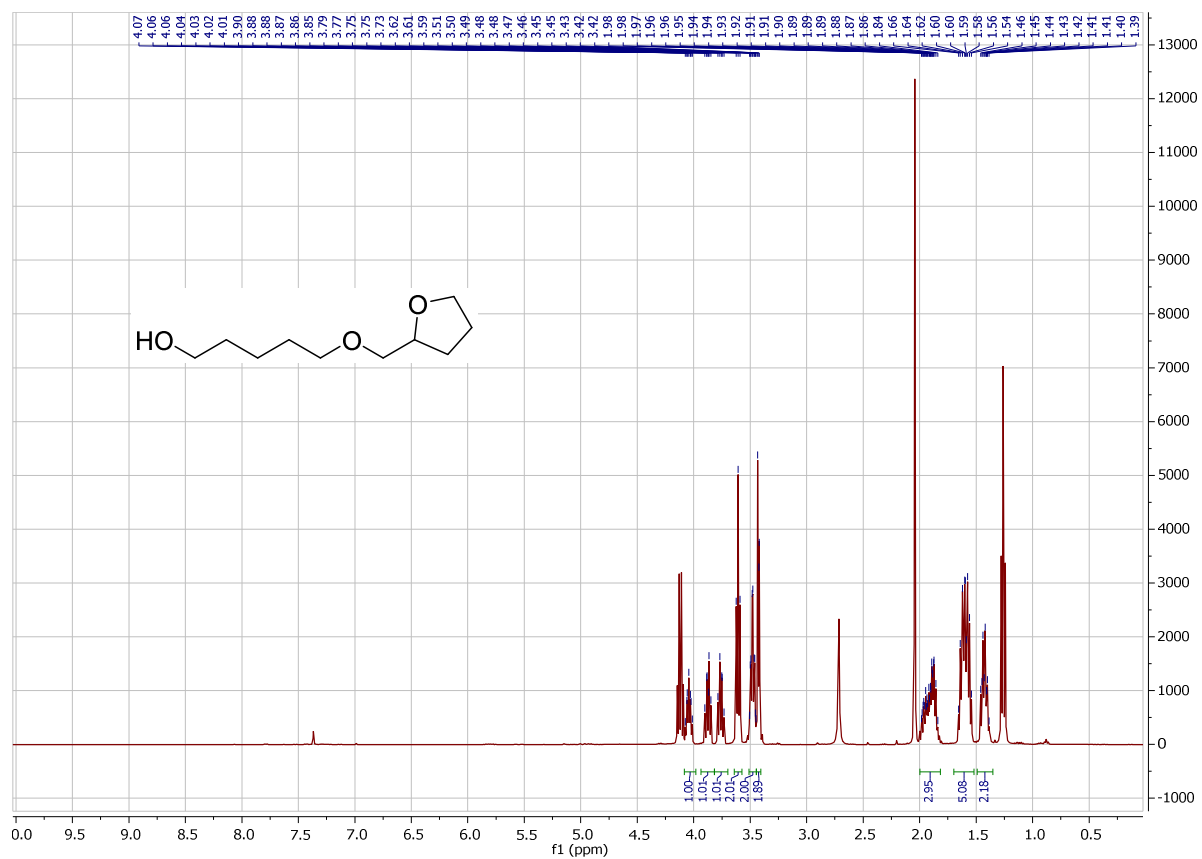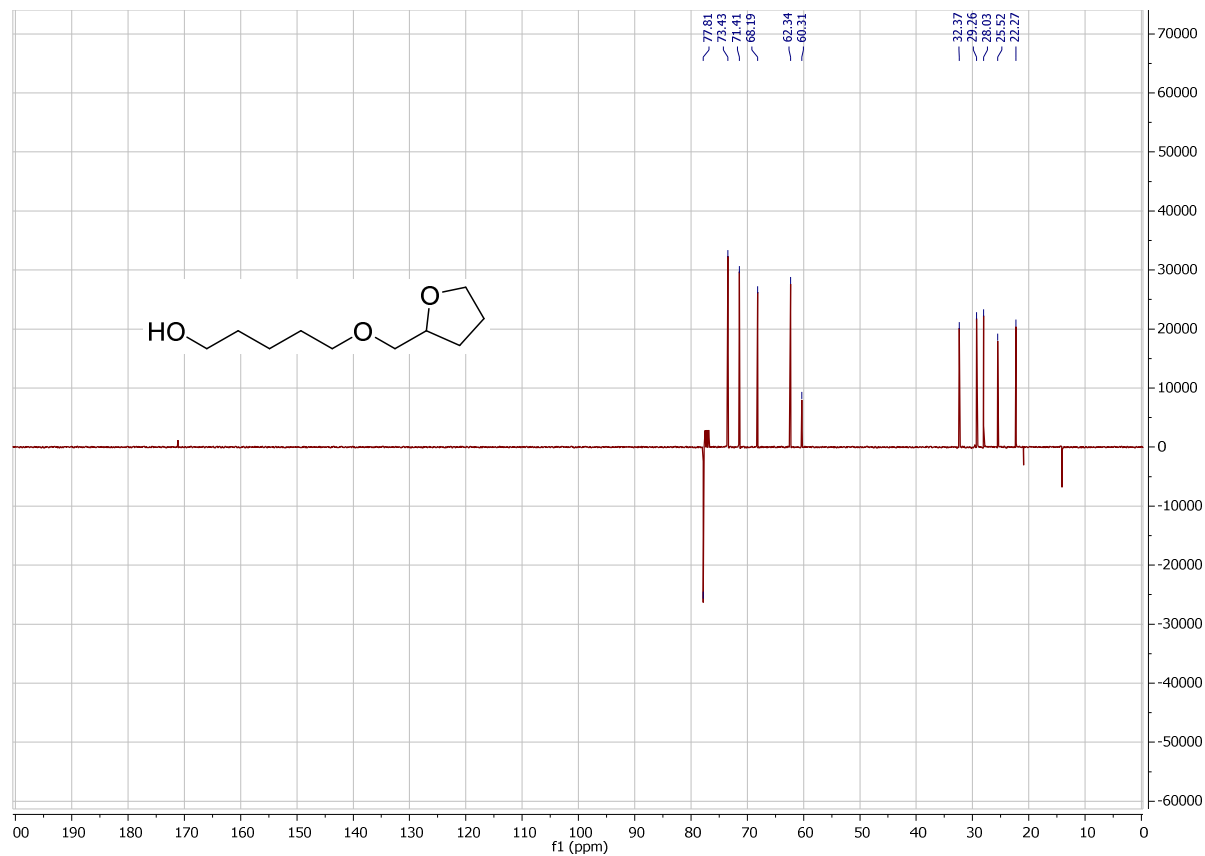

**$^1\text{H-NMR}$  and  $^{13}\text{C-NMR}$  of compound B34 in  $\text{CDCl}_3$ .**

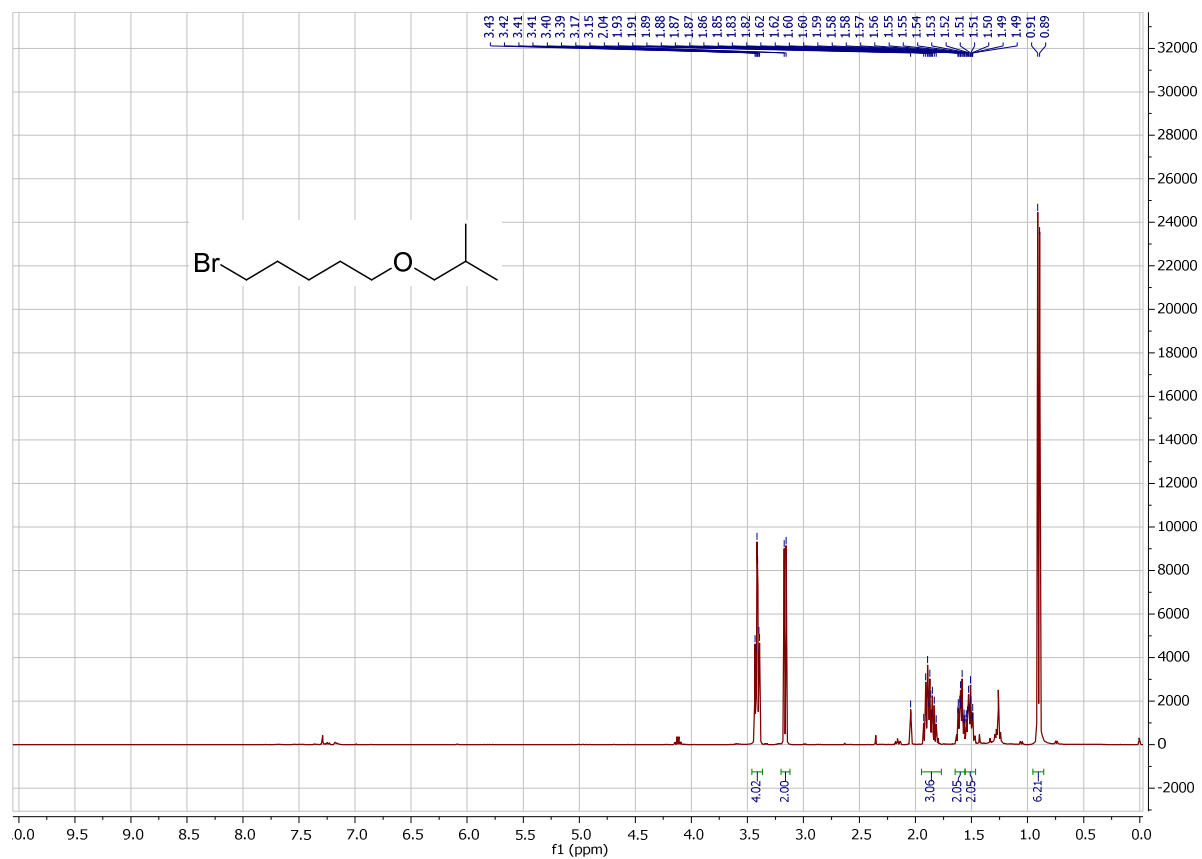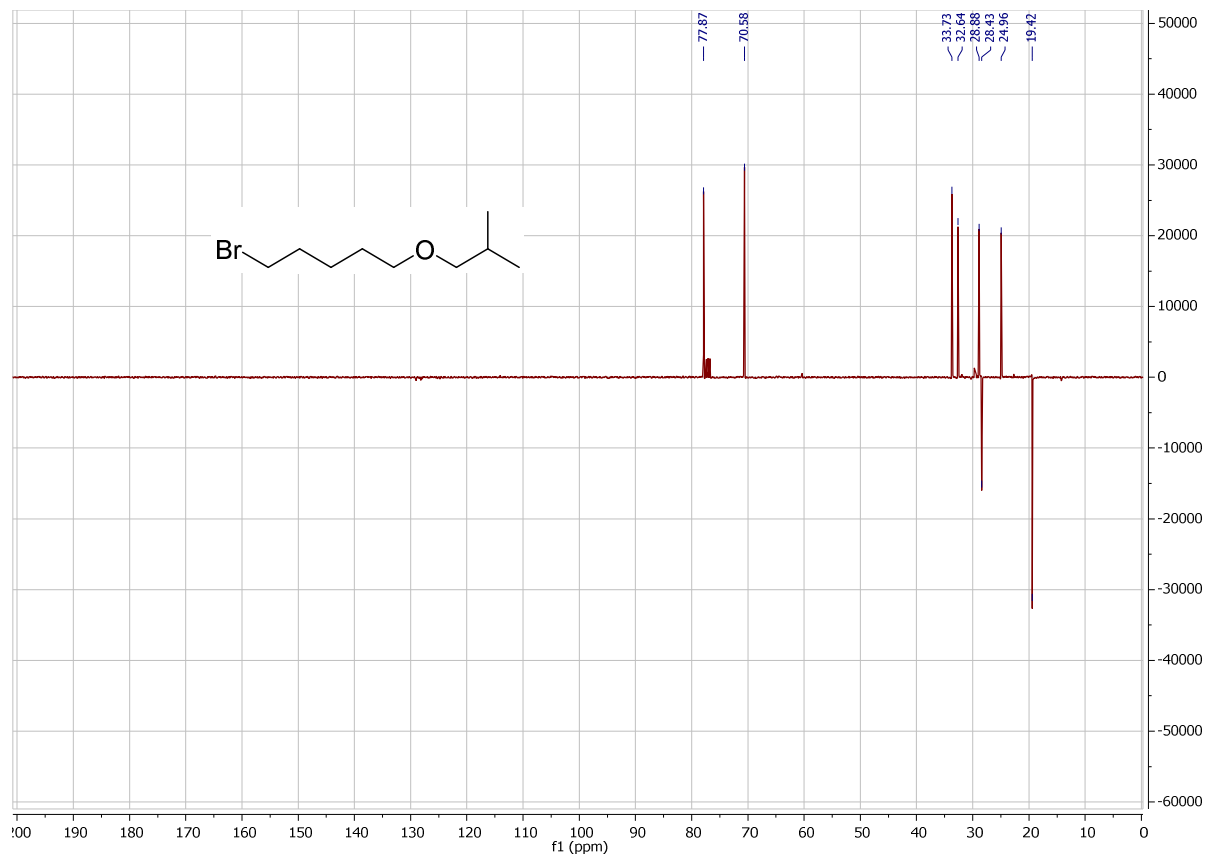



<sup>1</sup>H-NMR and <sup>13</sup>C-NMR of compound B36 in CDCl<sub>3</sub>.

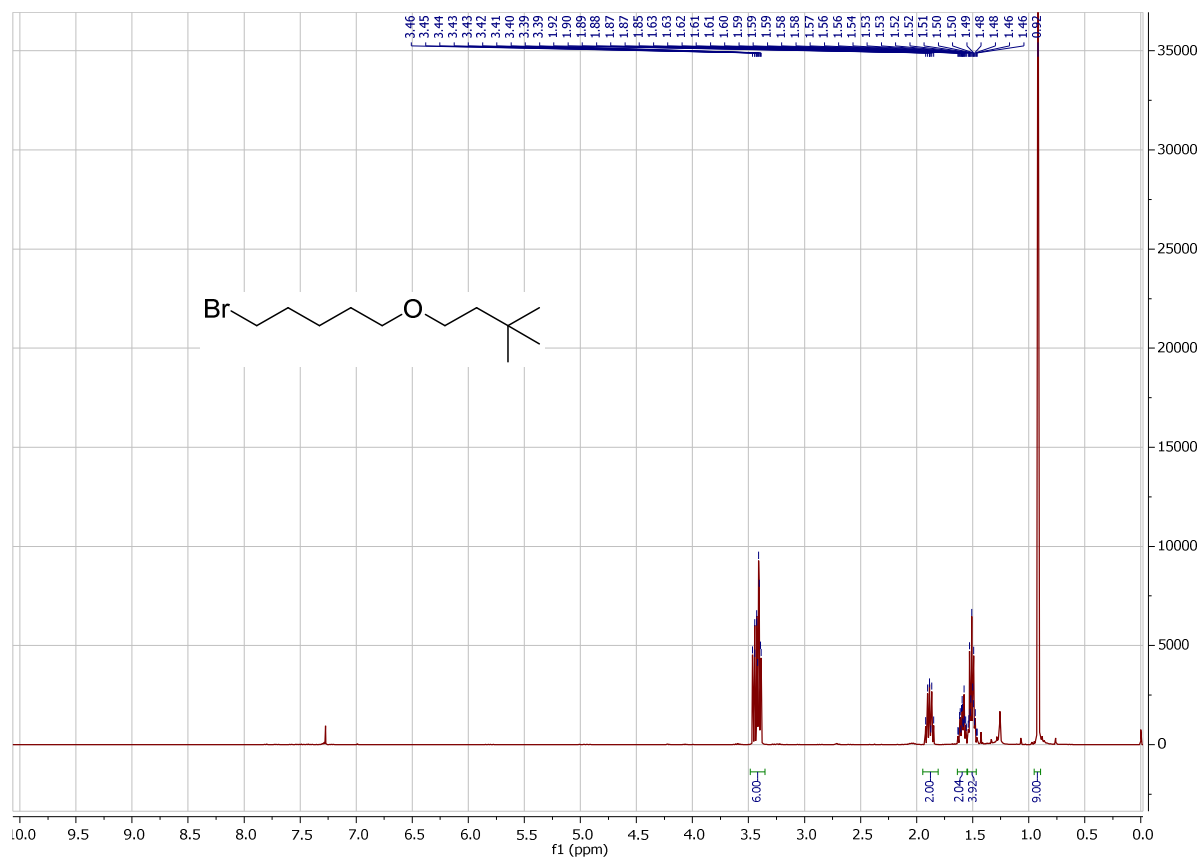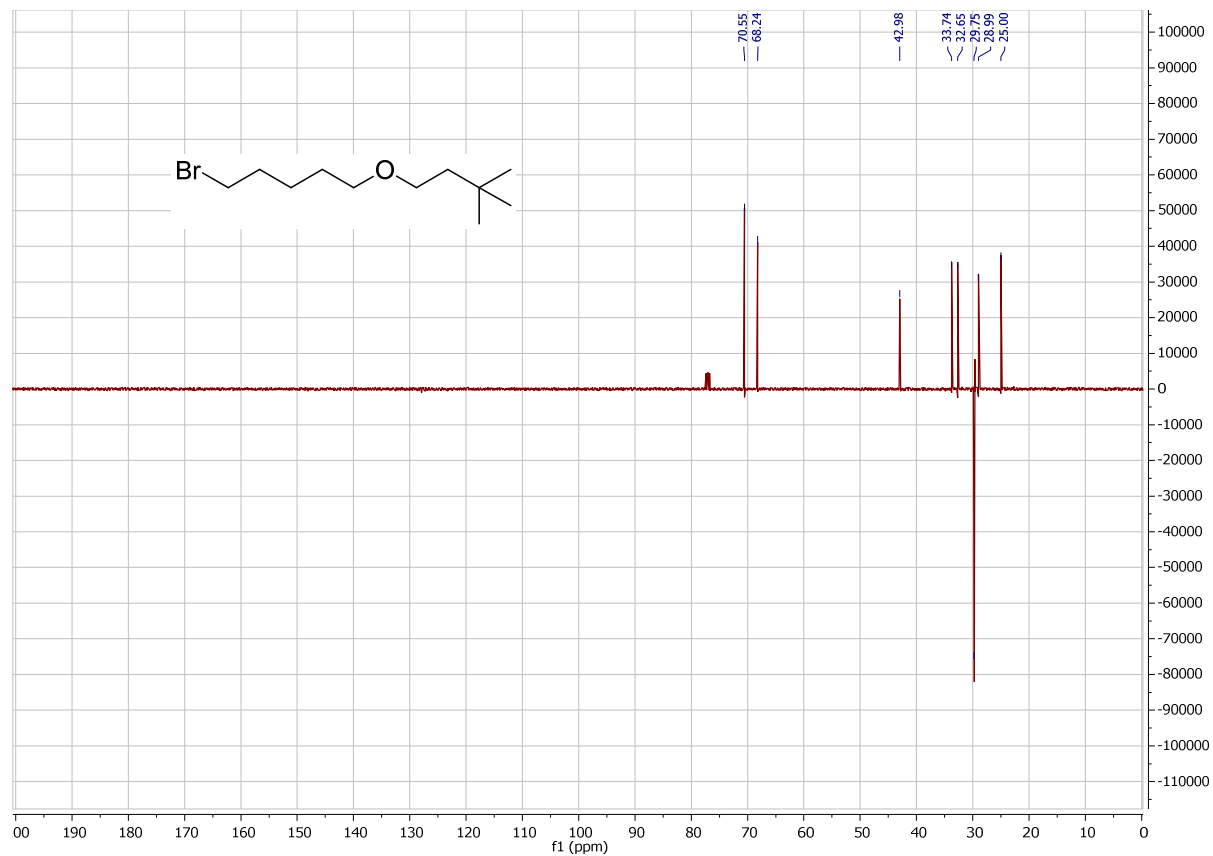

**$^1\text{H-NMR}$  and  $^{13}\text{C-NMR}$  of compound B37 in  $\text{CDCl}_3$ .**

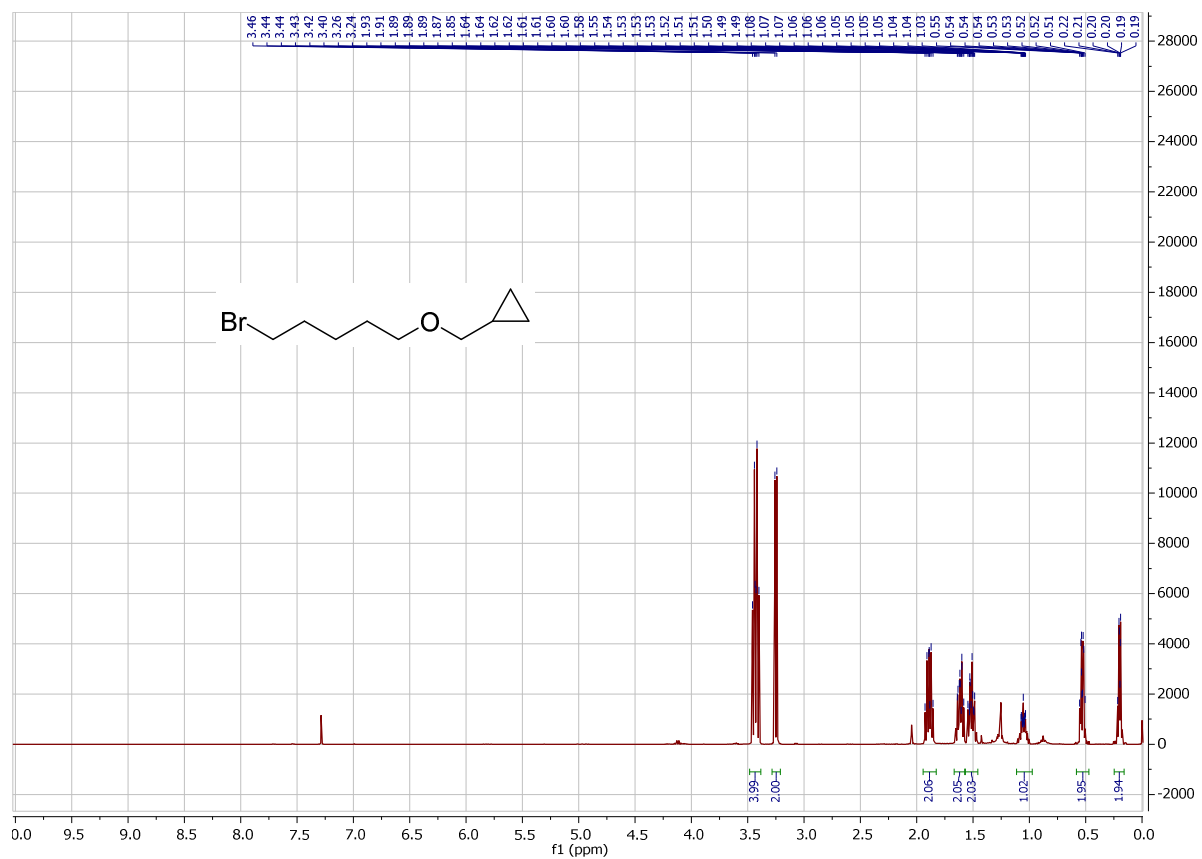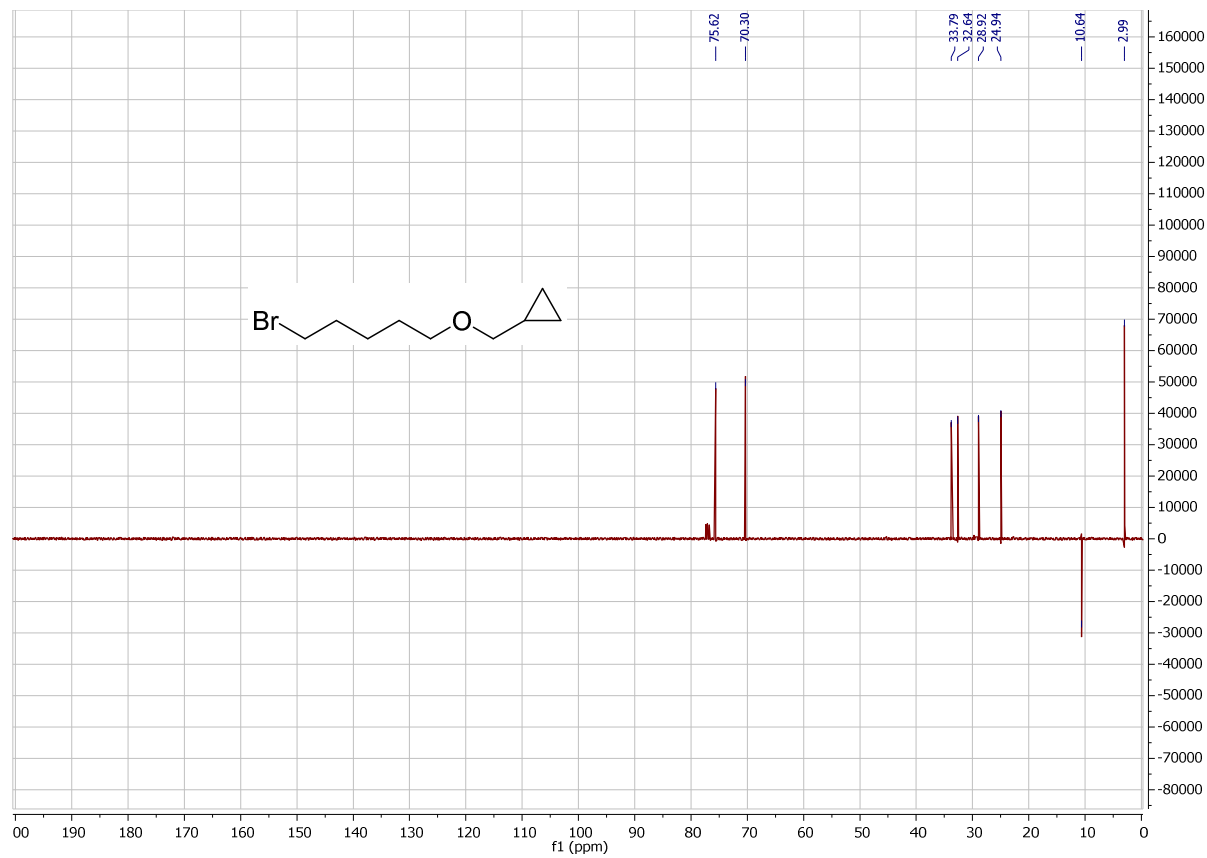



**$^1\text{H-NMR}$  and  $^{13}\text{C-NMR}$  of compound B38 in  $\text{CDCl}_3$ .**

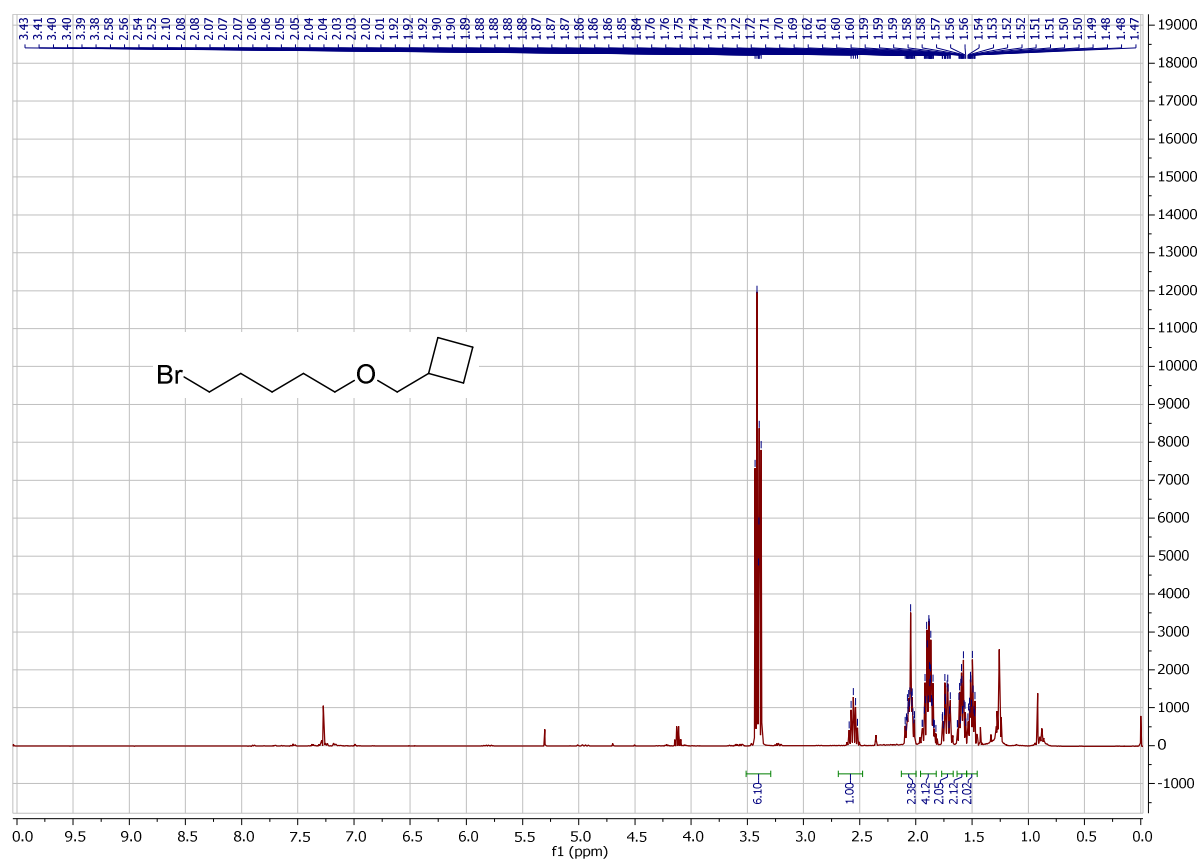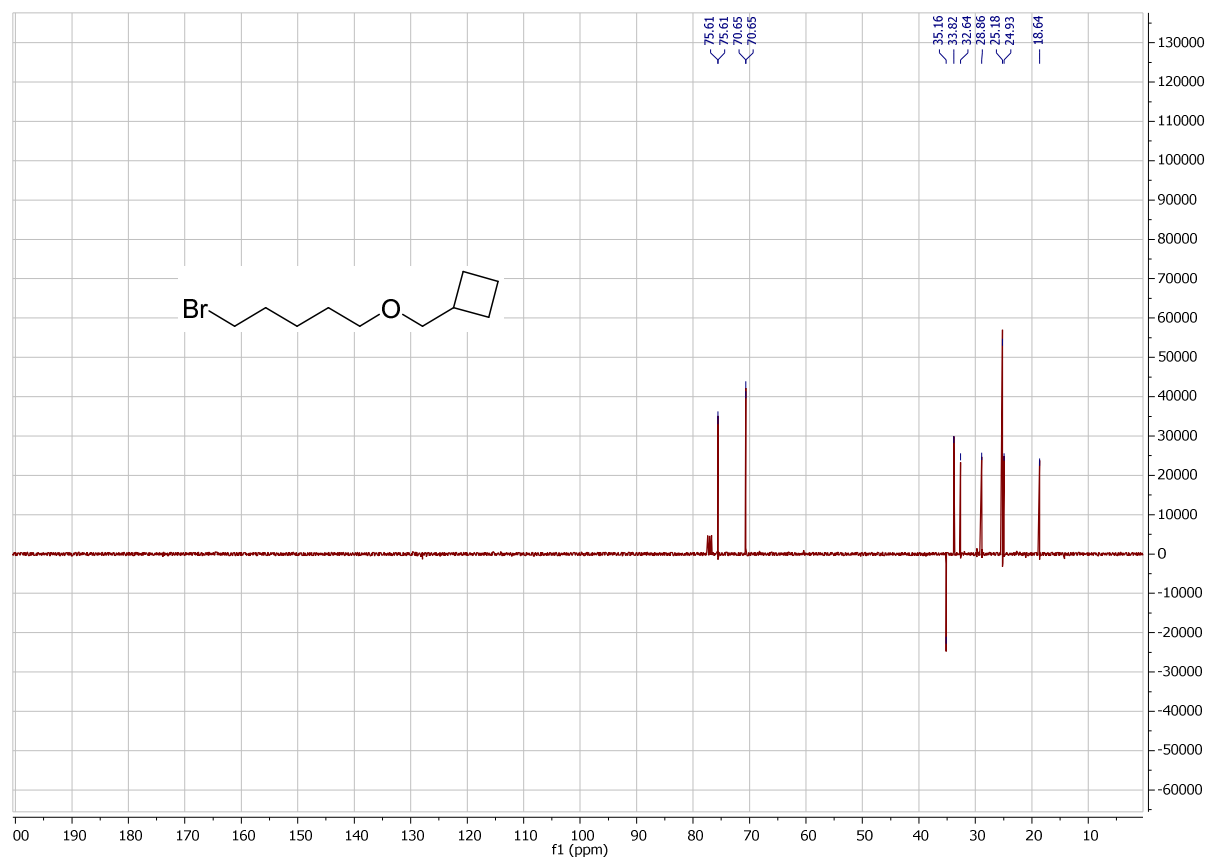



# $^1\text{H-NMR}$ and $^{13}\text{C-NMR}$ of compound B40 in $\text{CDCl}_3$ .

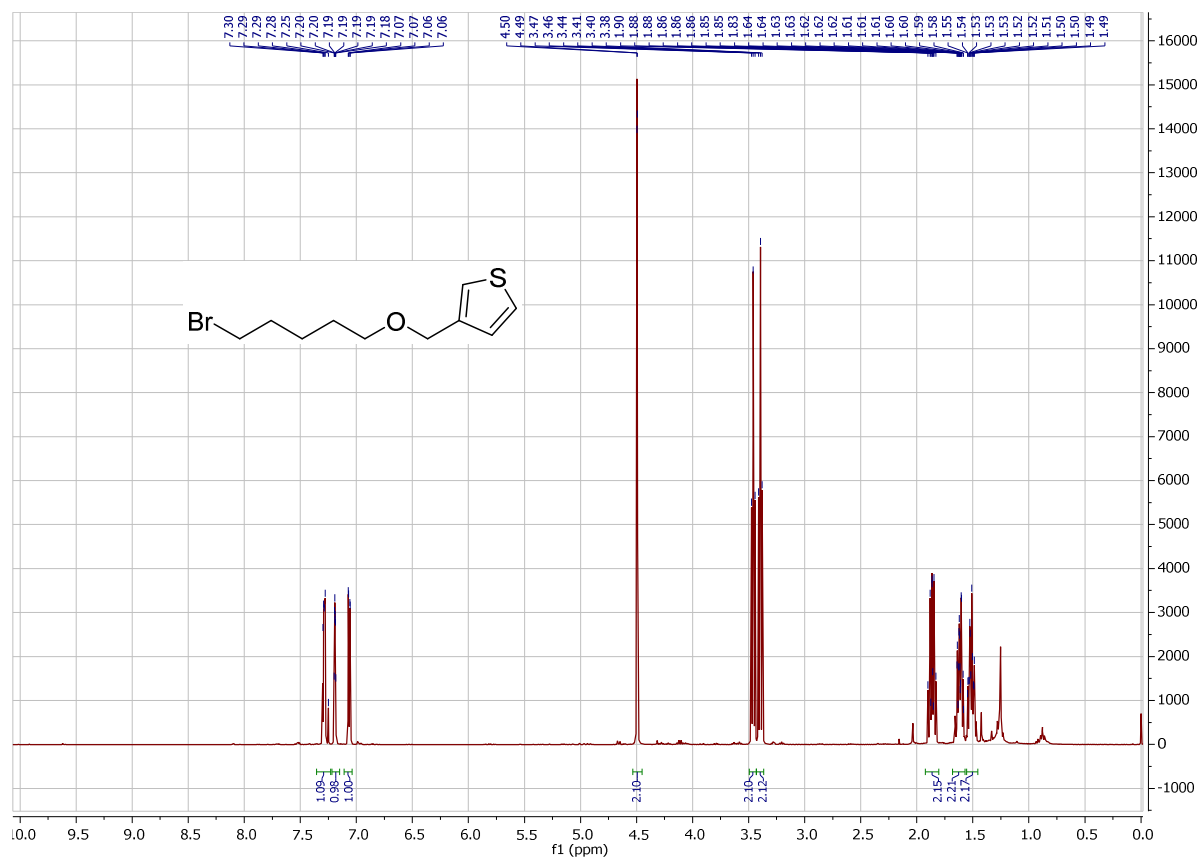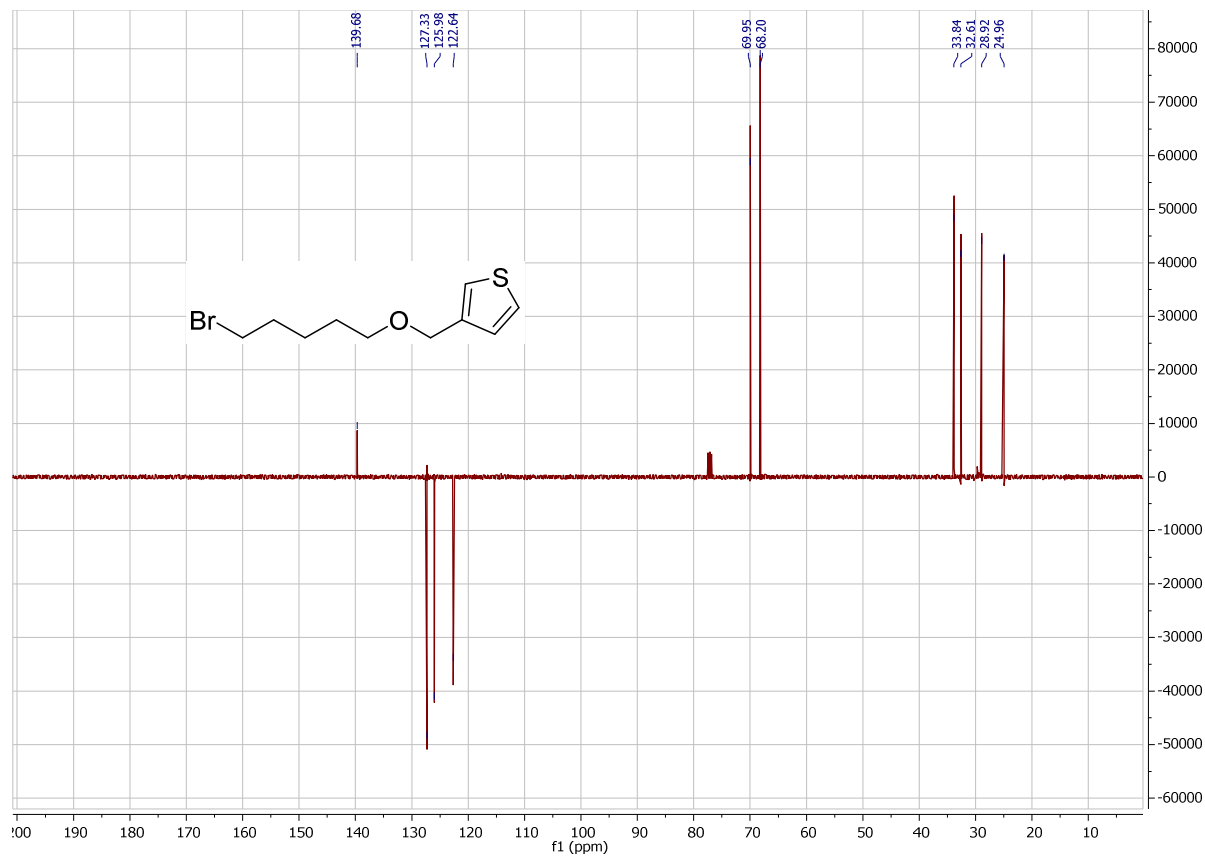

**$^1\text{H-NMR}$  and  $^{13}\text{C-NMR}$  of compound B41 in  $\text{CDCl}_3$ .**

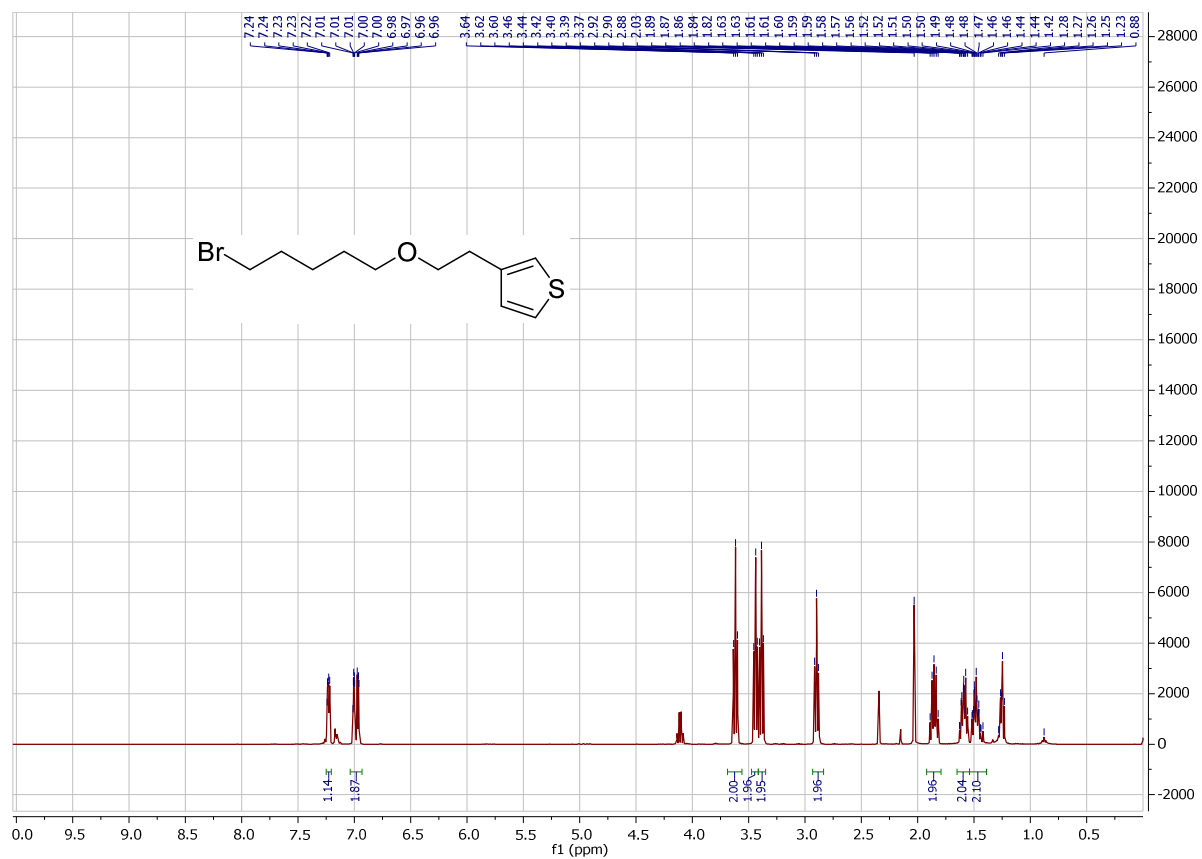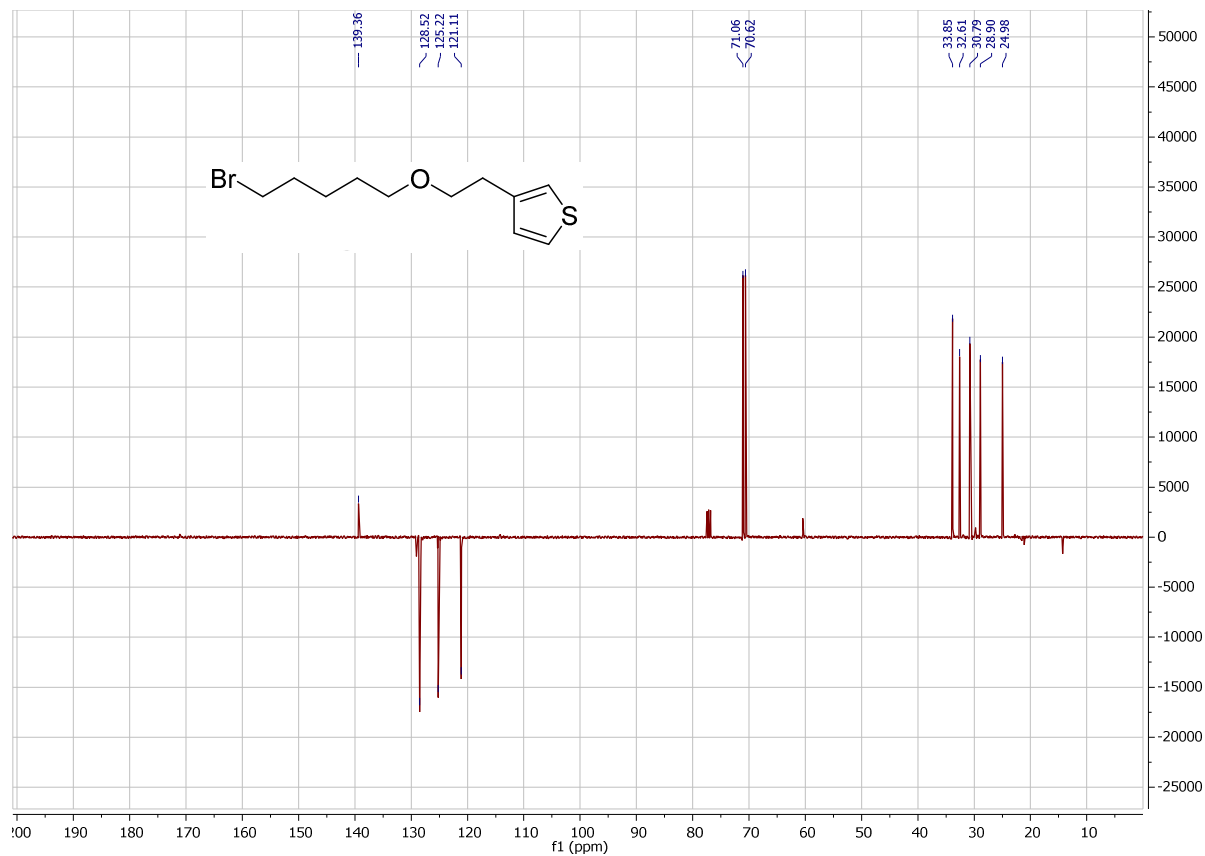

# $^1\text{H-NMR}$ and $^{13}\text{C-NMR}$ of compound B42 in $\text{CDCl}_3$ .

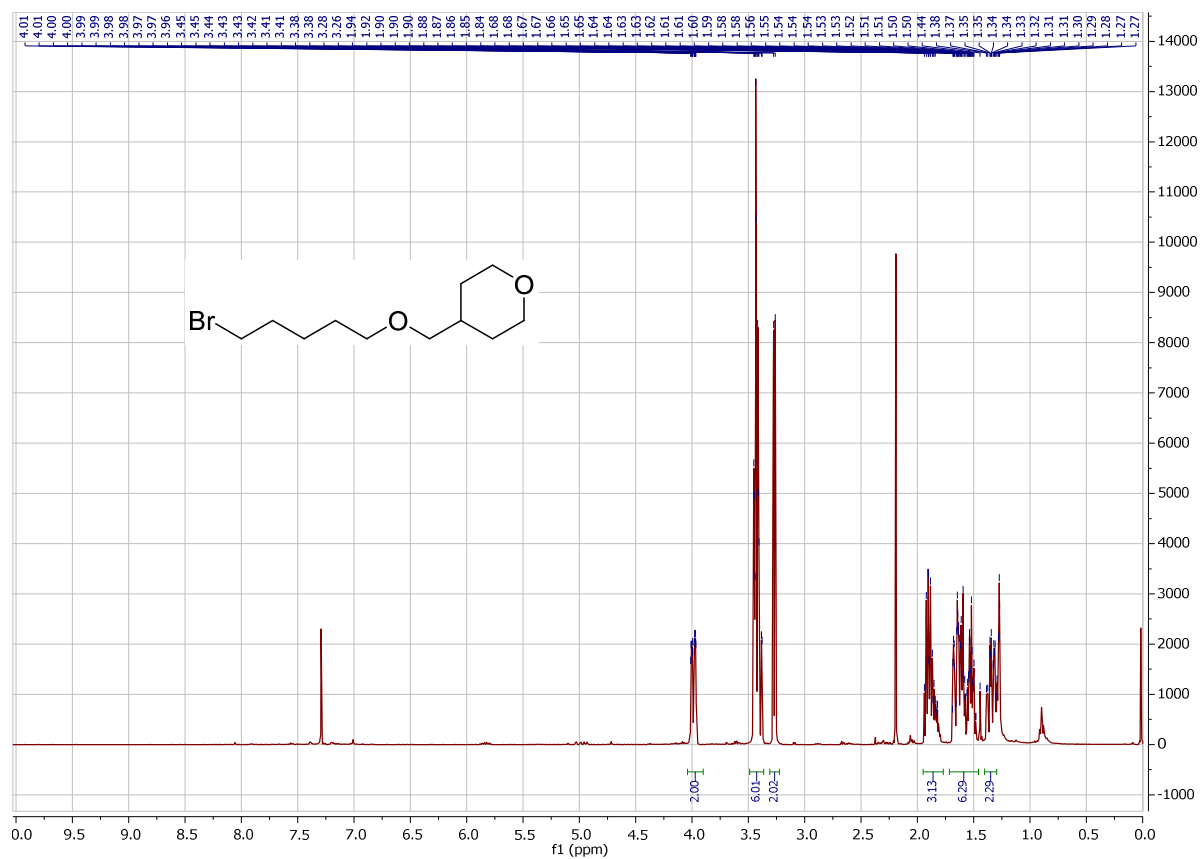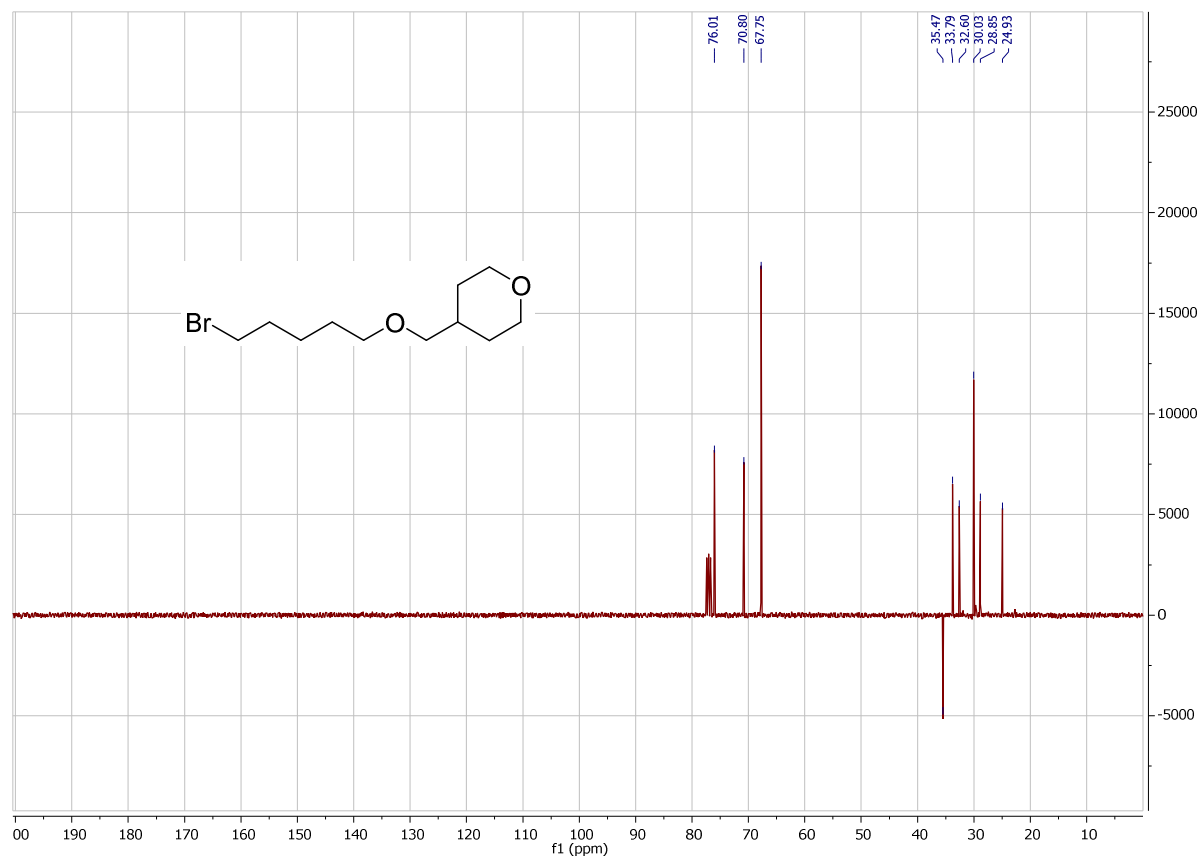

<sup>1</sup>H-NMR and <sup>13</sup>C-NMR of compound B43 in CDCl<sub>3</sub>.

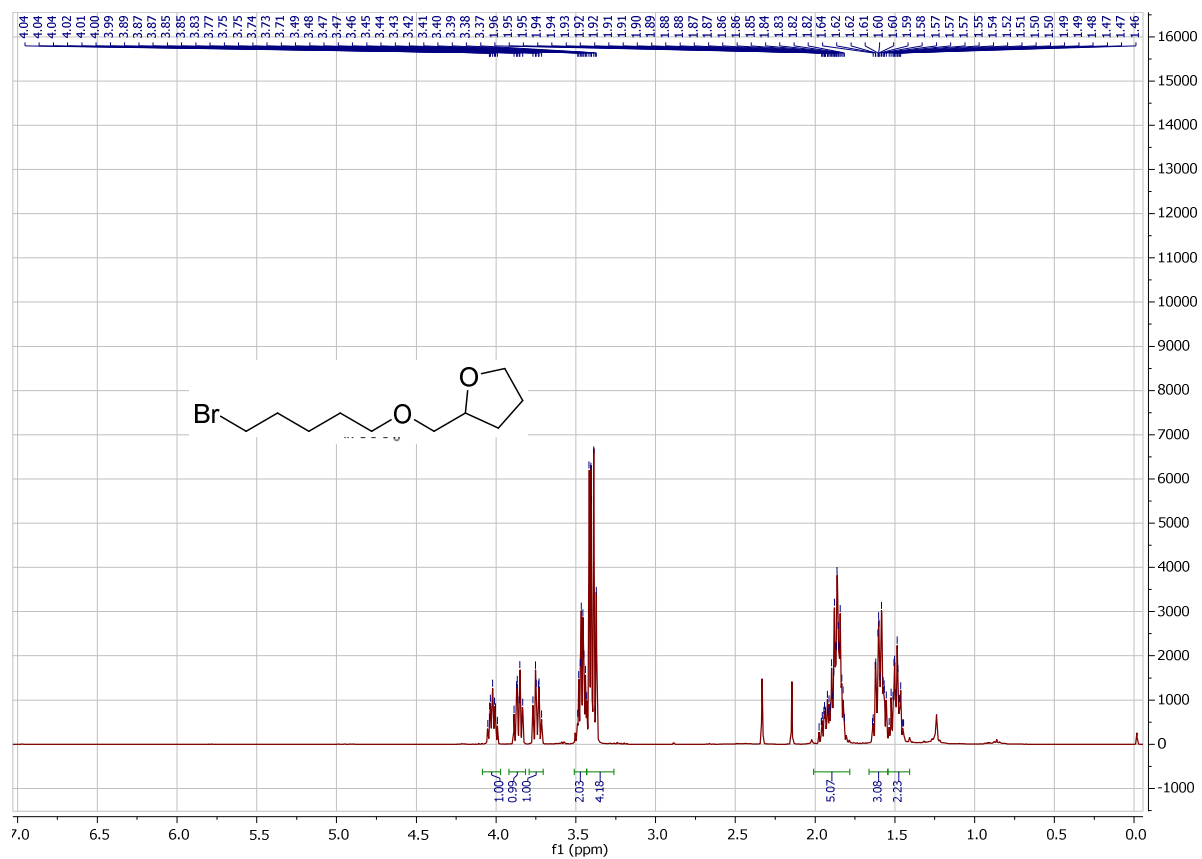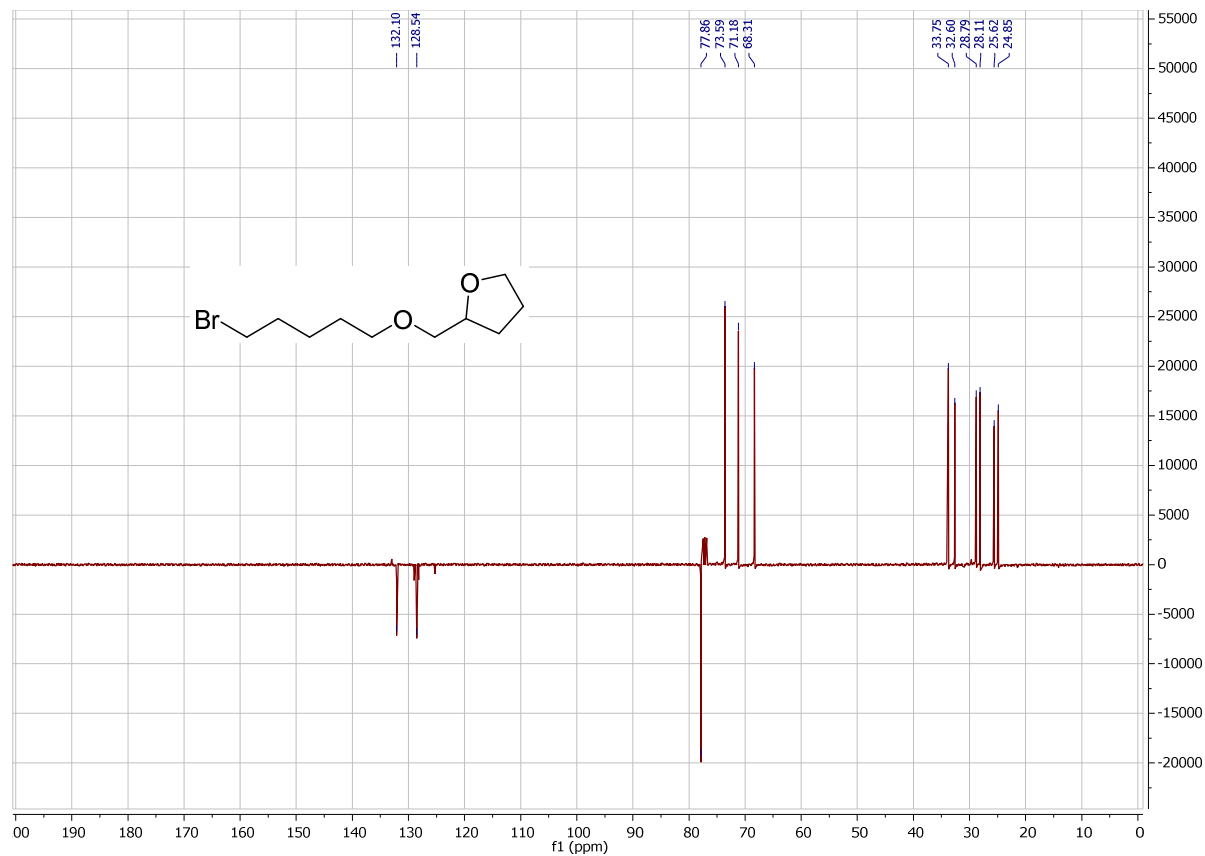

**$^1\text{H-NMR}$  and  $^{13}\text{C-NMR}$  of compound B44/11 in MeOD.**

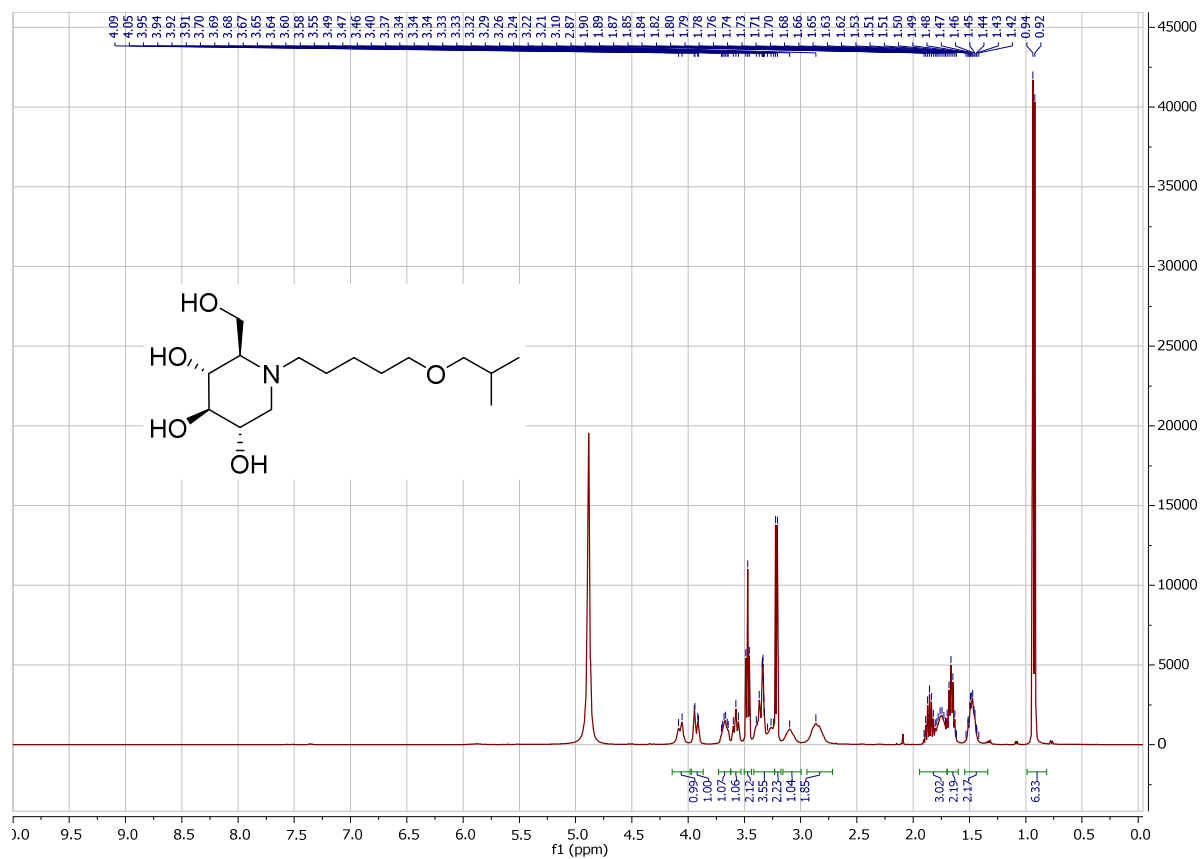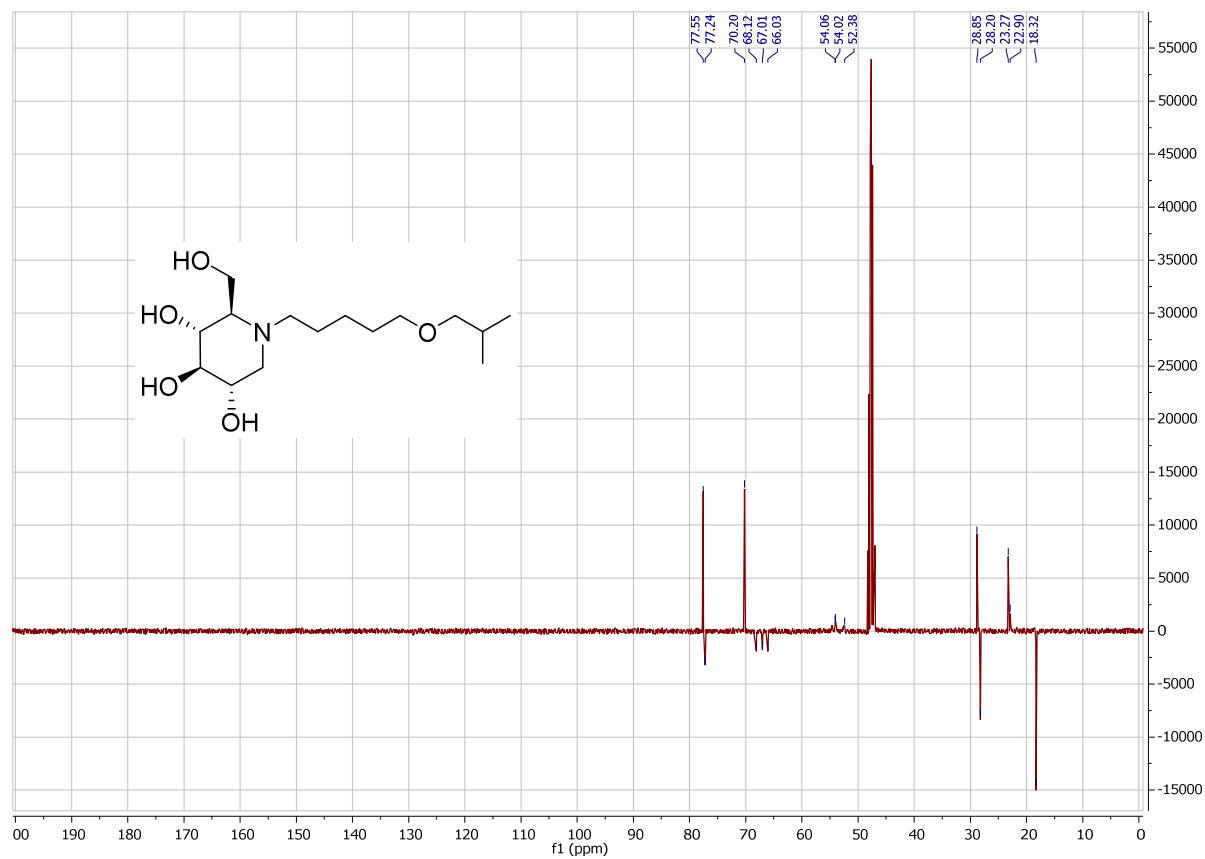

**$^1\text{H-NMR}$  and  $^{13}\text{C-NMR}$  of compound B45/13 in MeOD.**

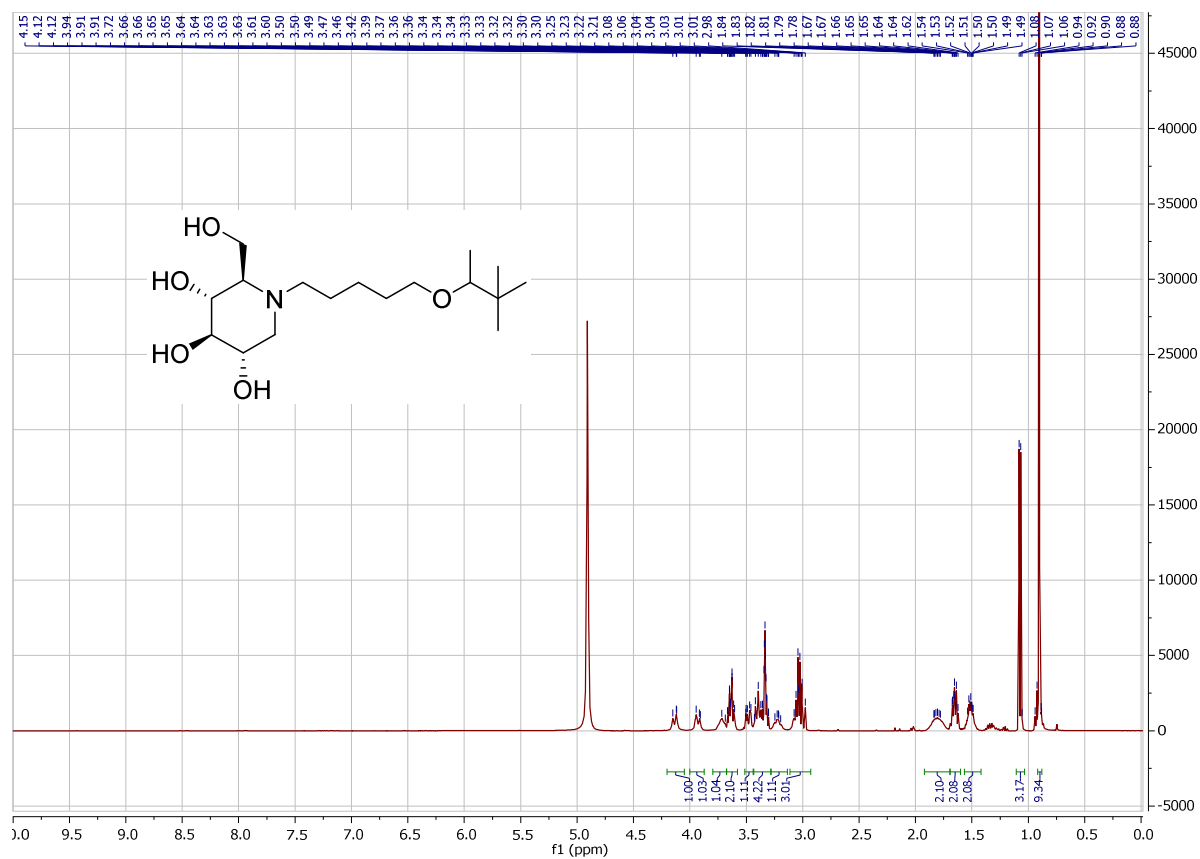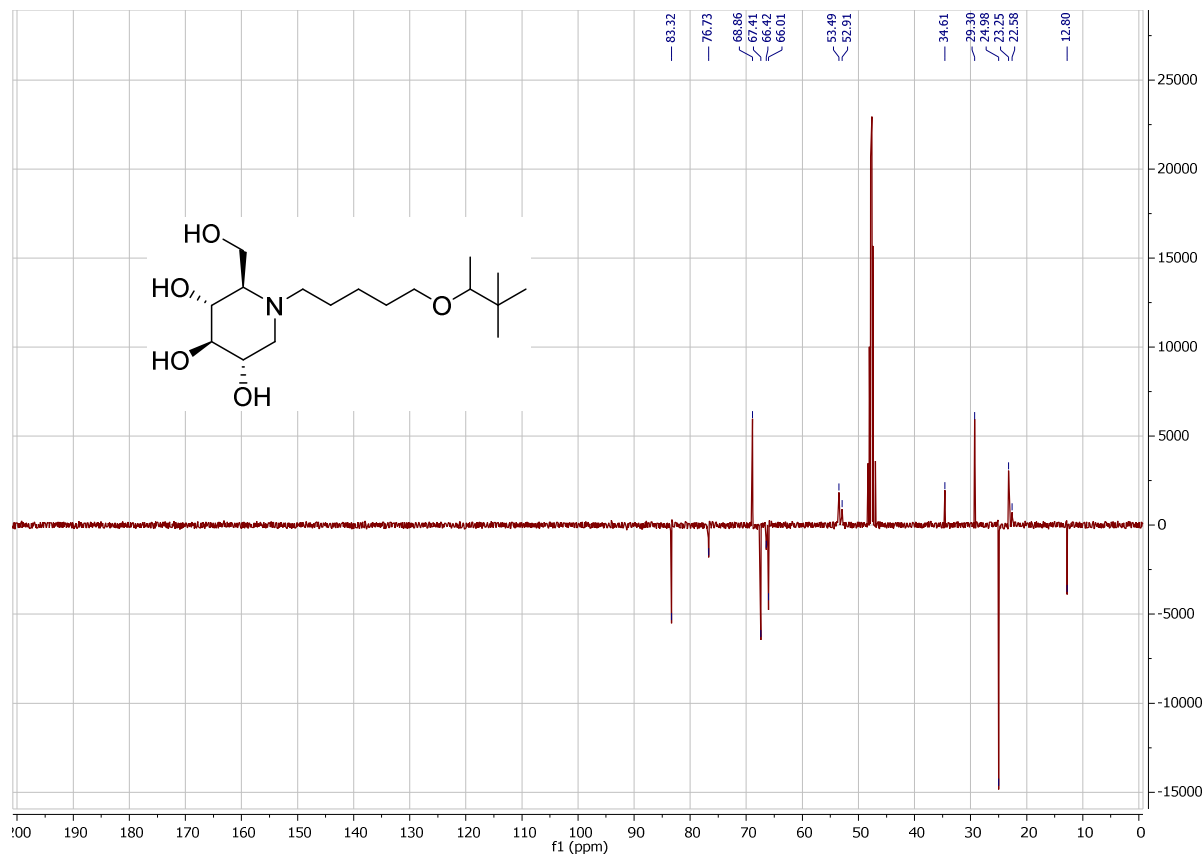



# <sup>1</sup>H-NMR and <sup>13</sup>C-NMR of compound B46 in MeOD.

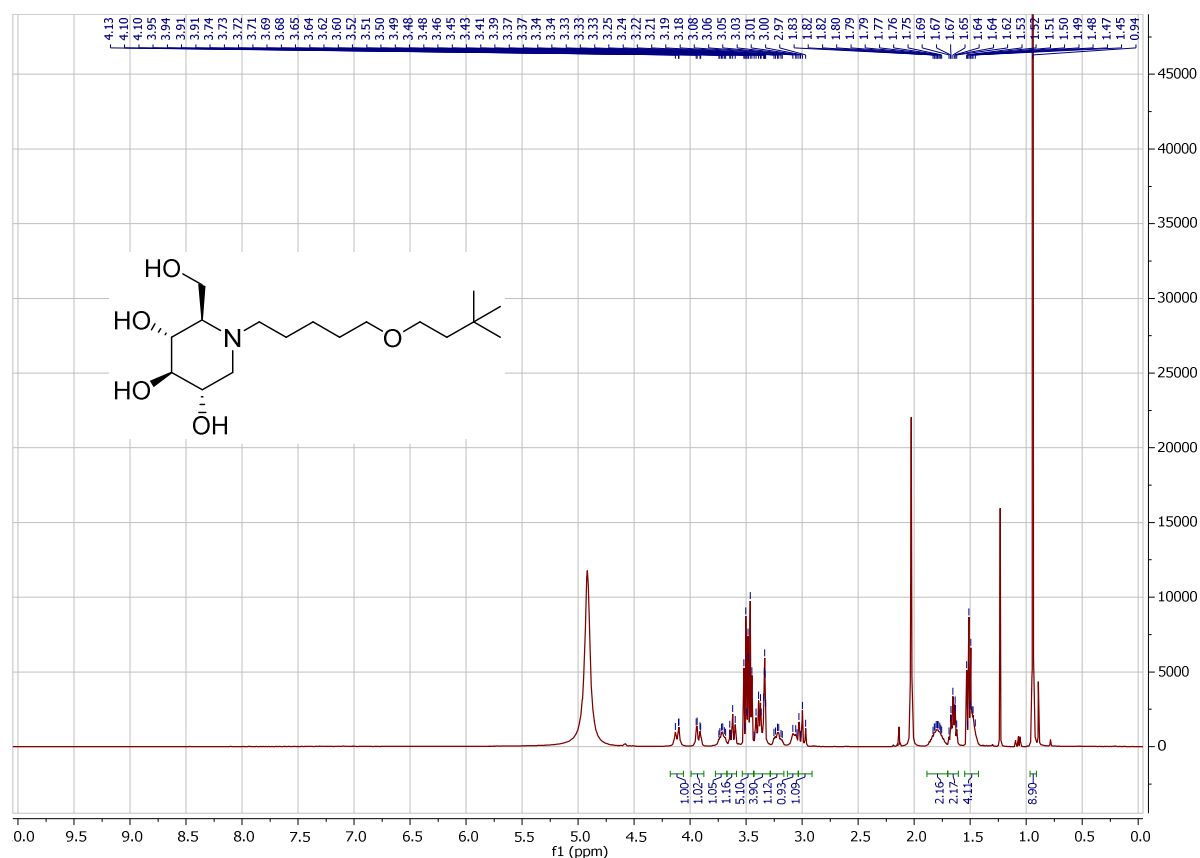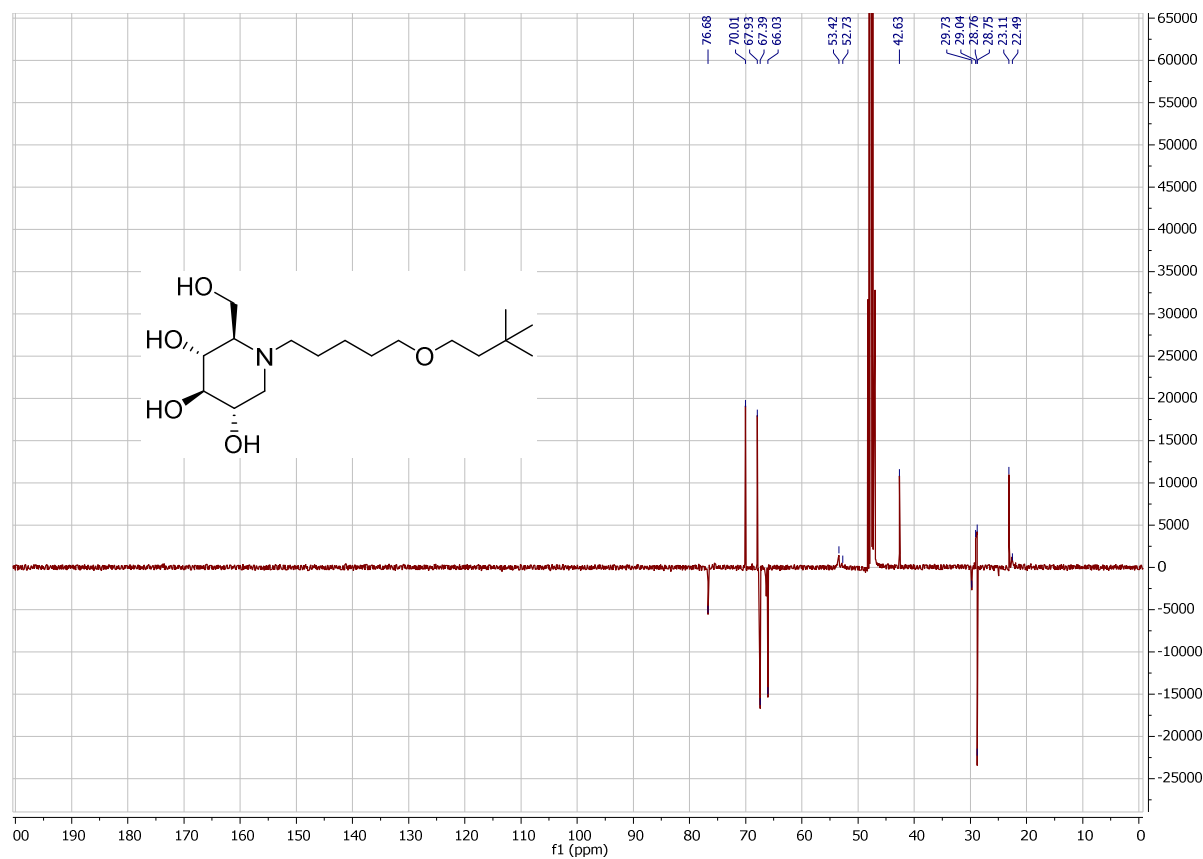





# $^1\text{H-NMR}$ and $^{13}\text{C-NMR}$ of compound B49 in MeOD.

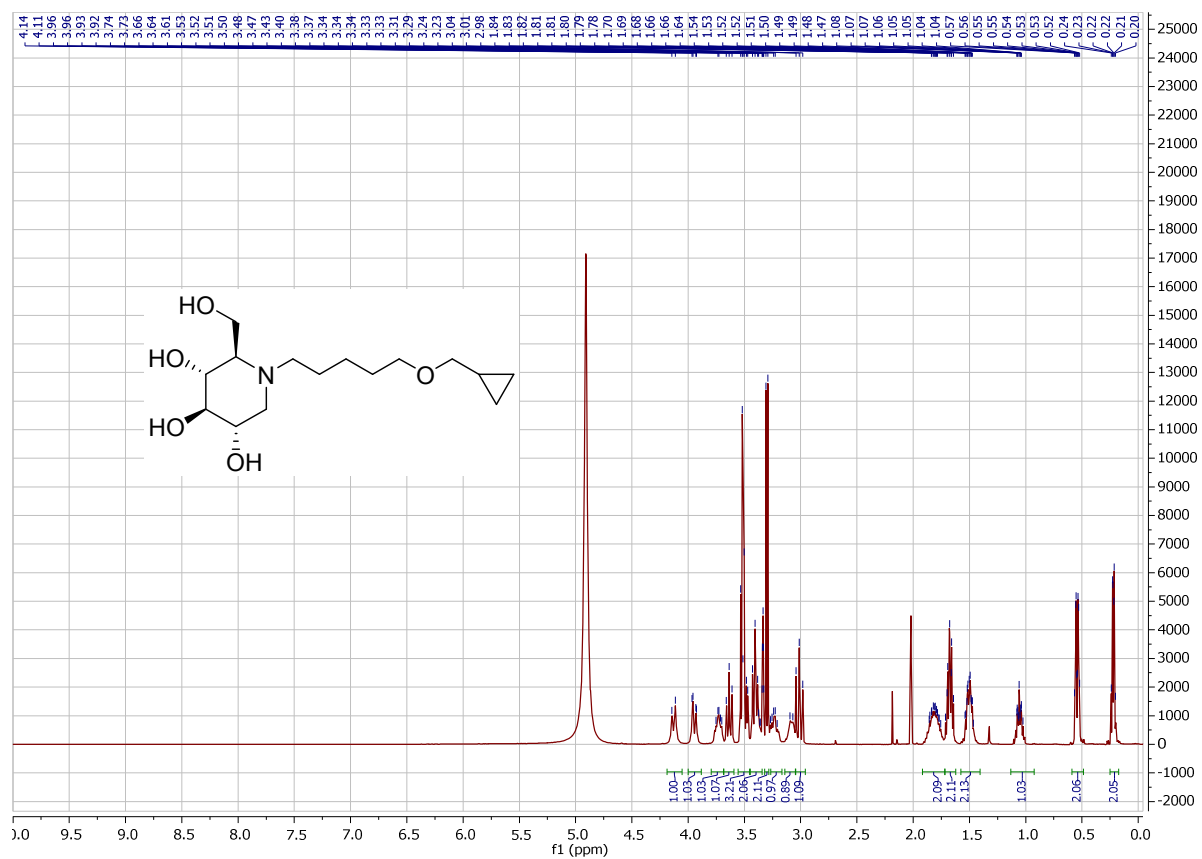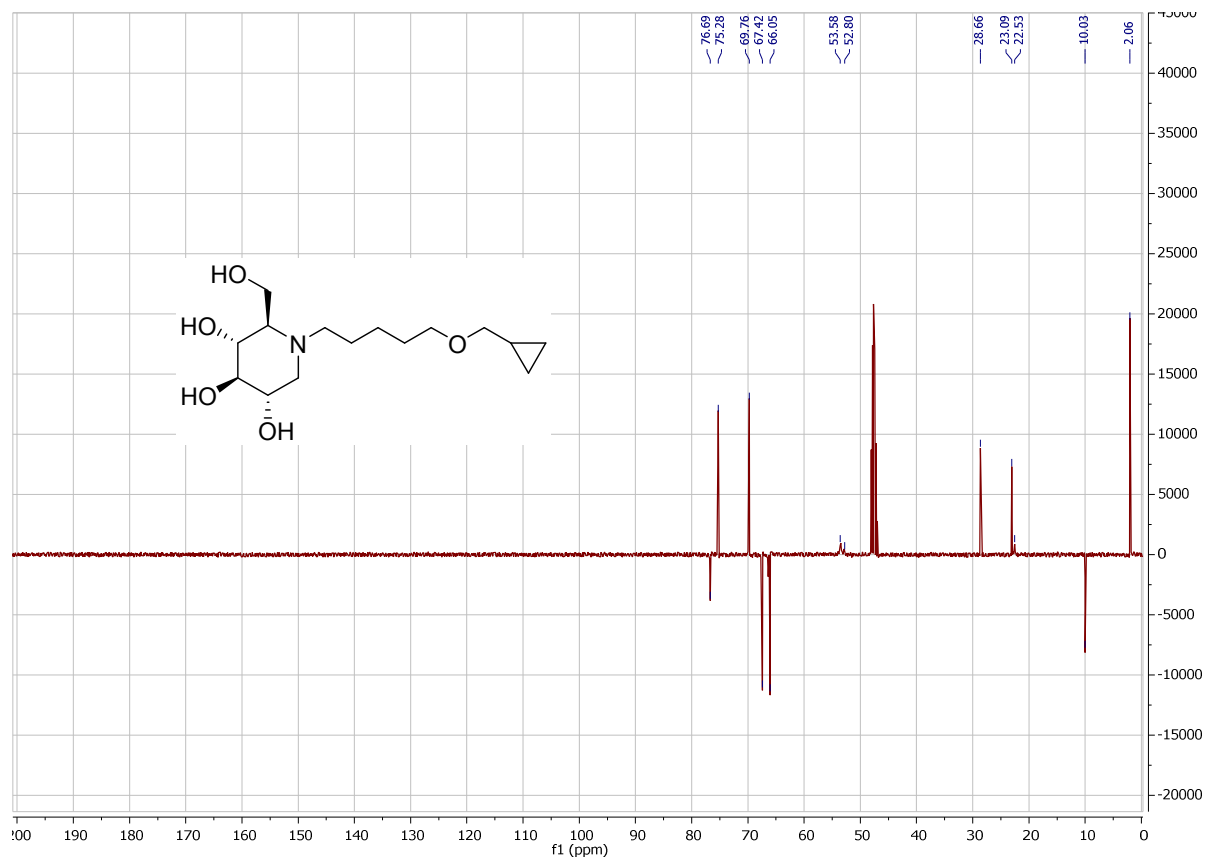

# $^1\text{H-NMR}$ and $^{13}\text{C-NMR}$ of compound B50 in MeOD.

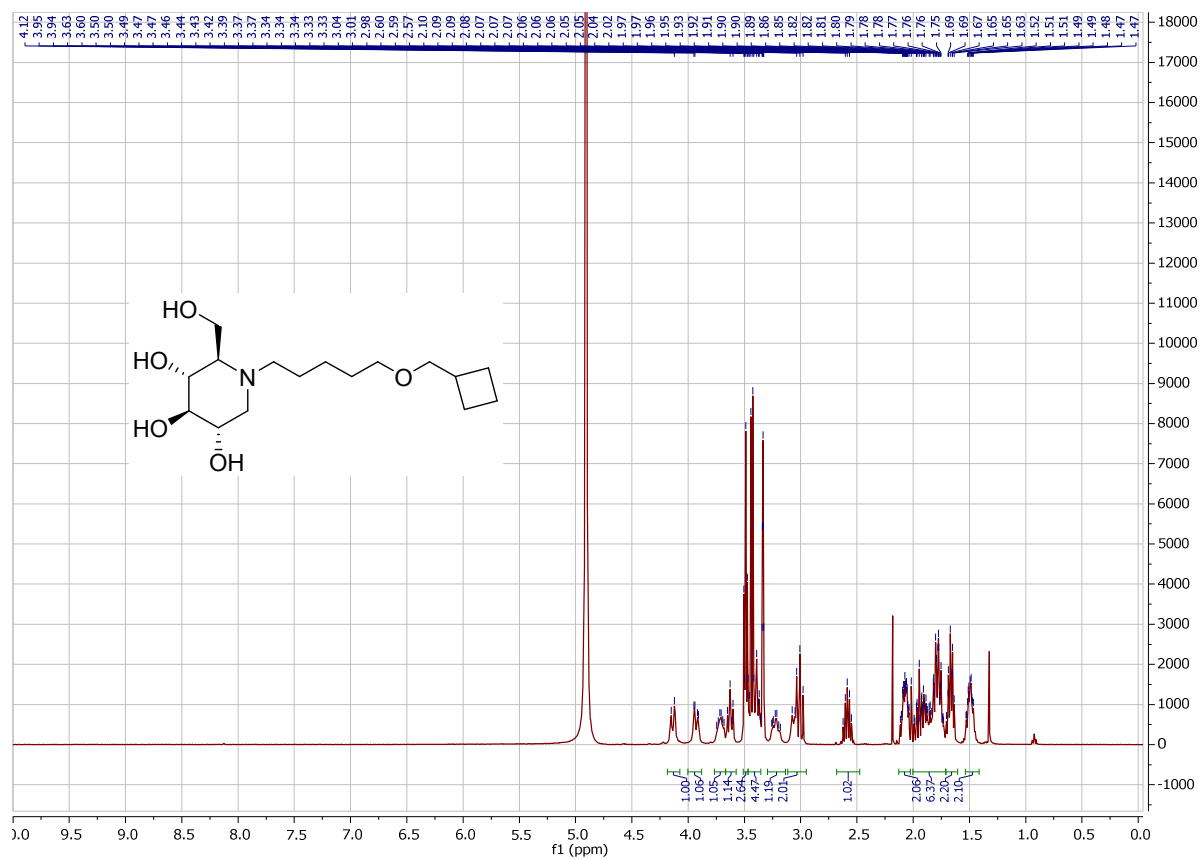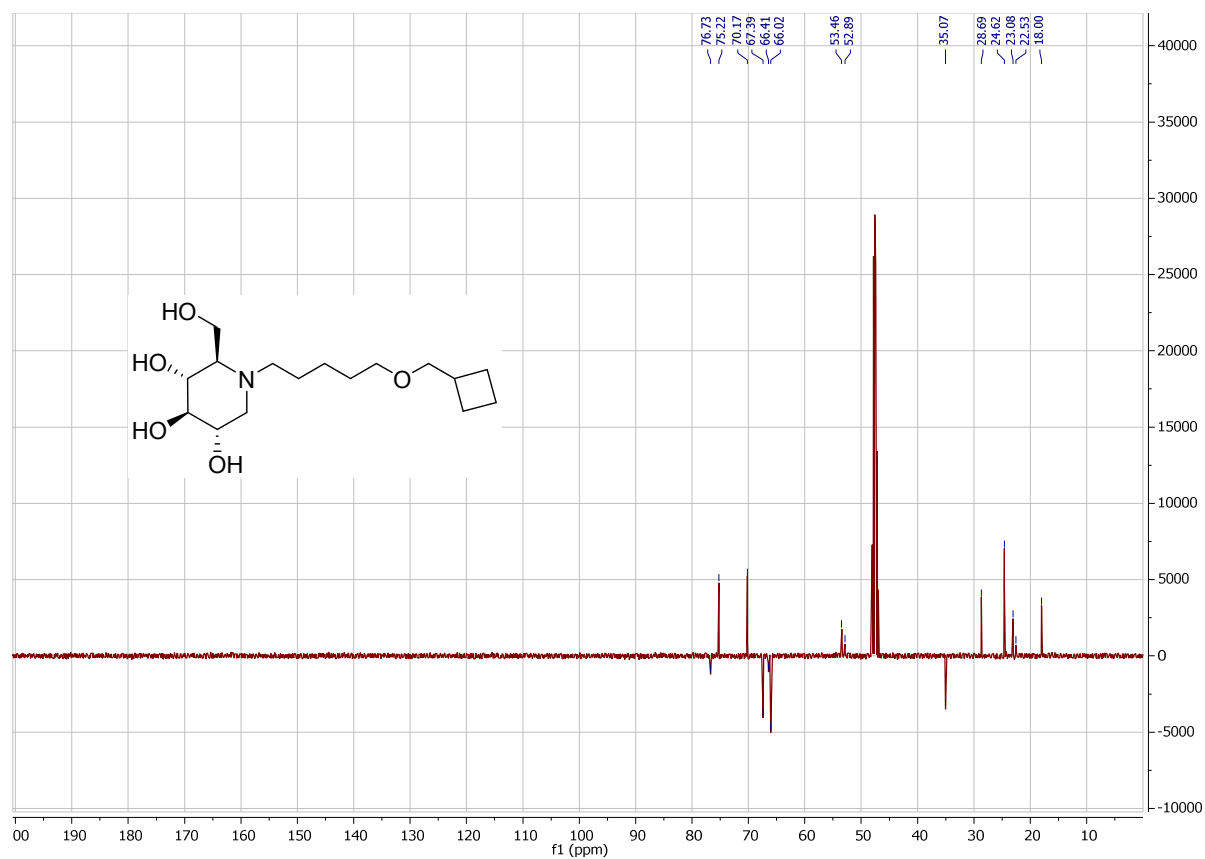

# <sup>1</sup>H-NMR and <sup>13</sup>C-NMR of compound B51 in MeOD.

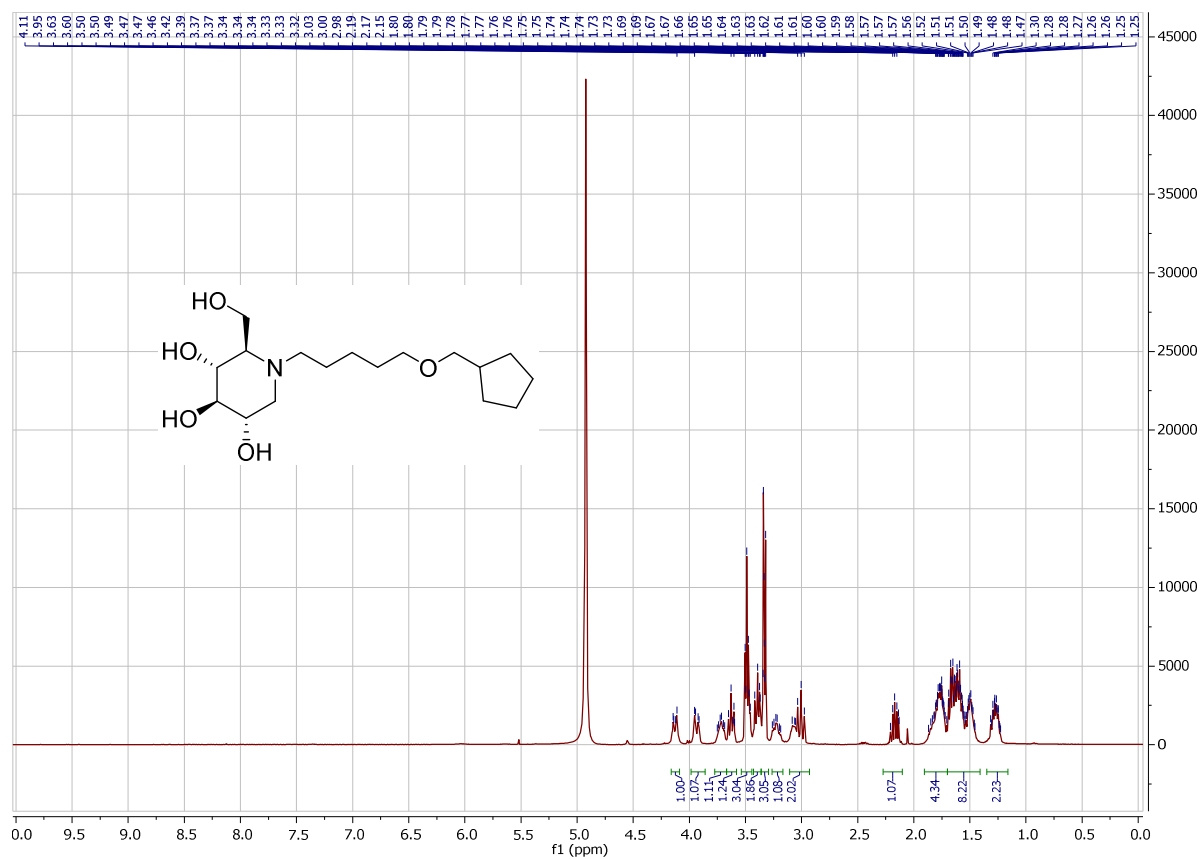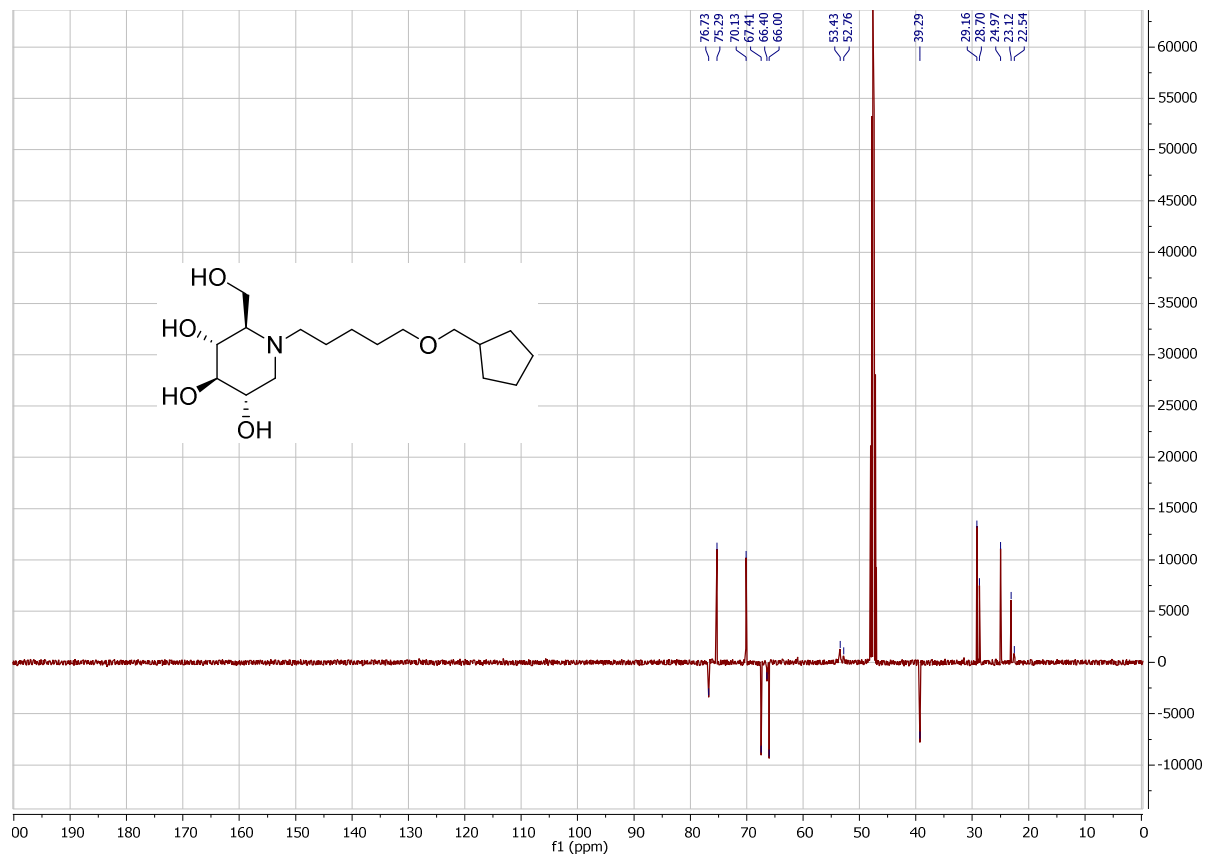

# $^1\text{H-NMR}$ and $^{13}\text{C-NMR}$ of compound B52 in MeOD.

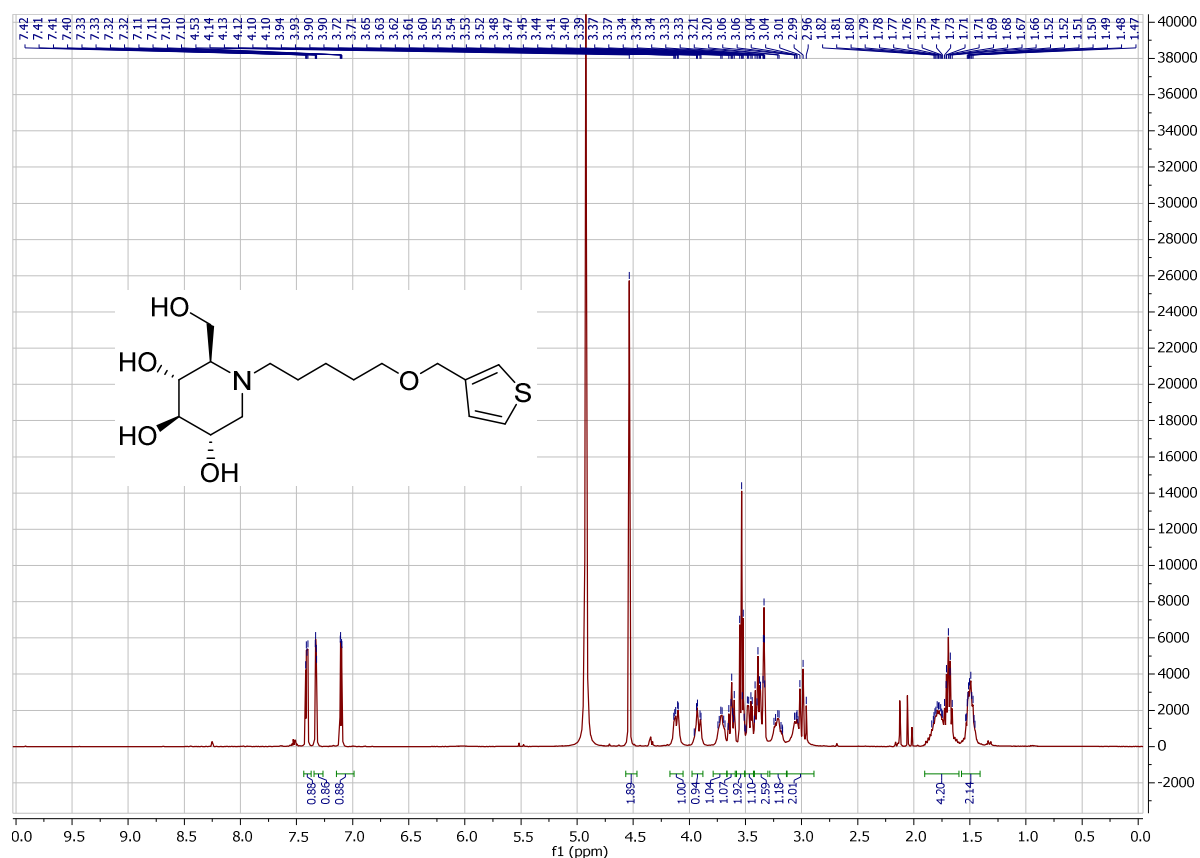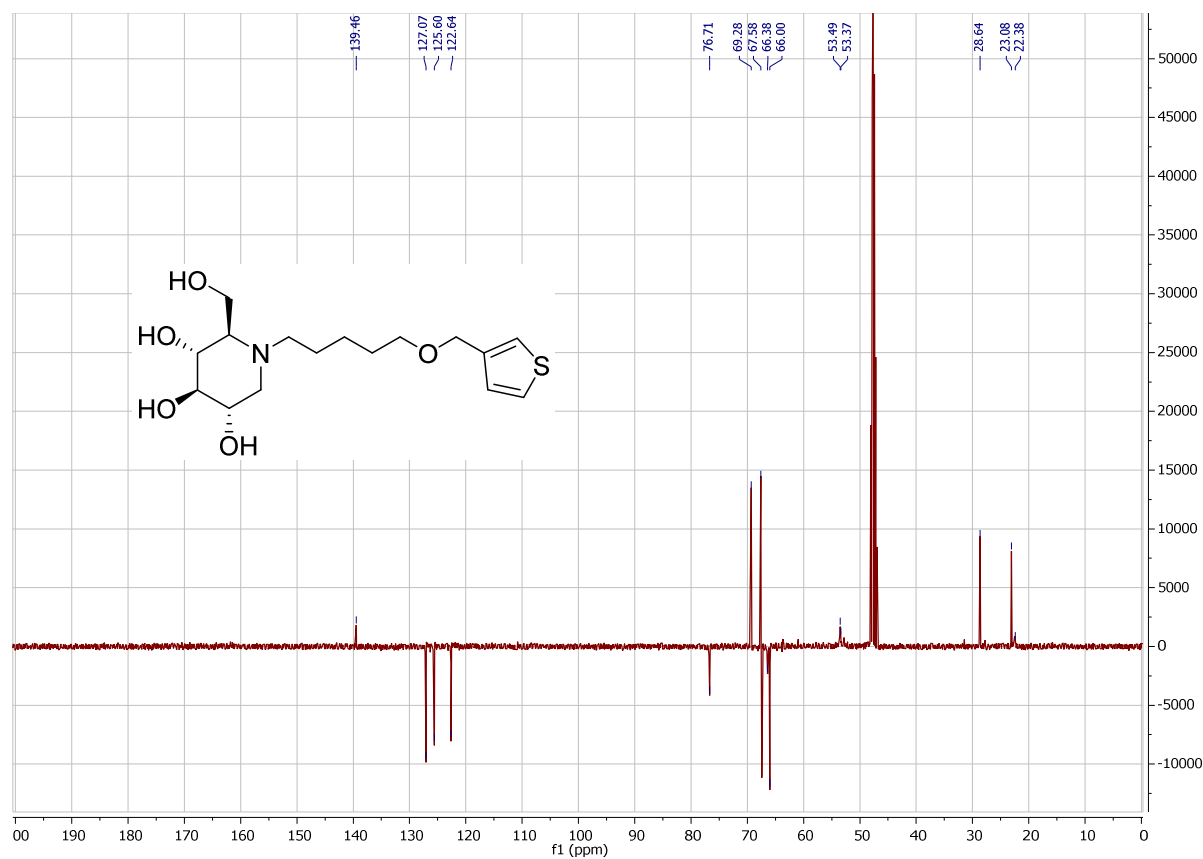

# $^1\text{H-NMR}$ and $^{13}\text{C-NMR}$ of compound B53 in MeOD.

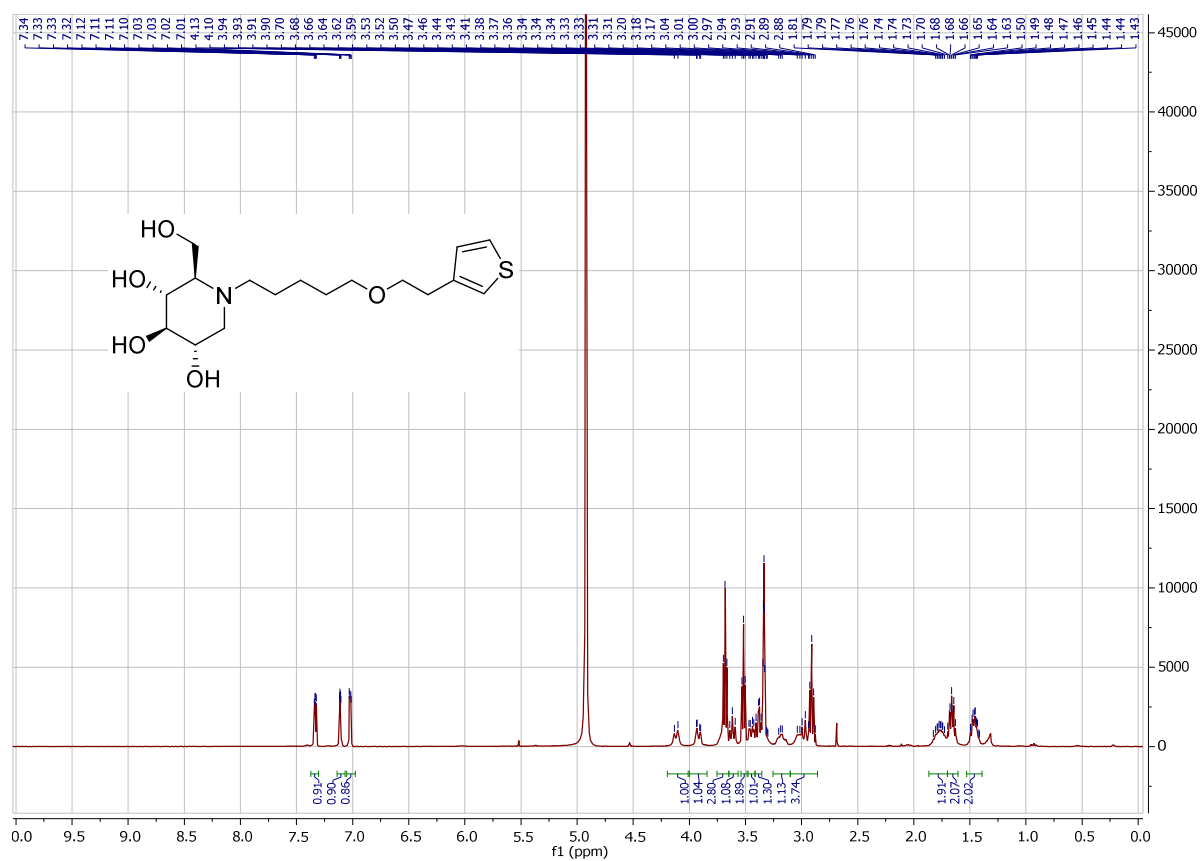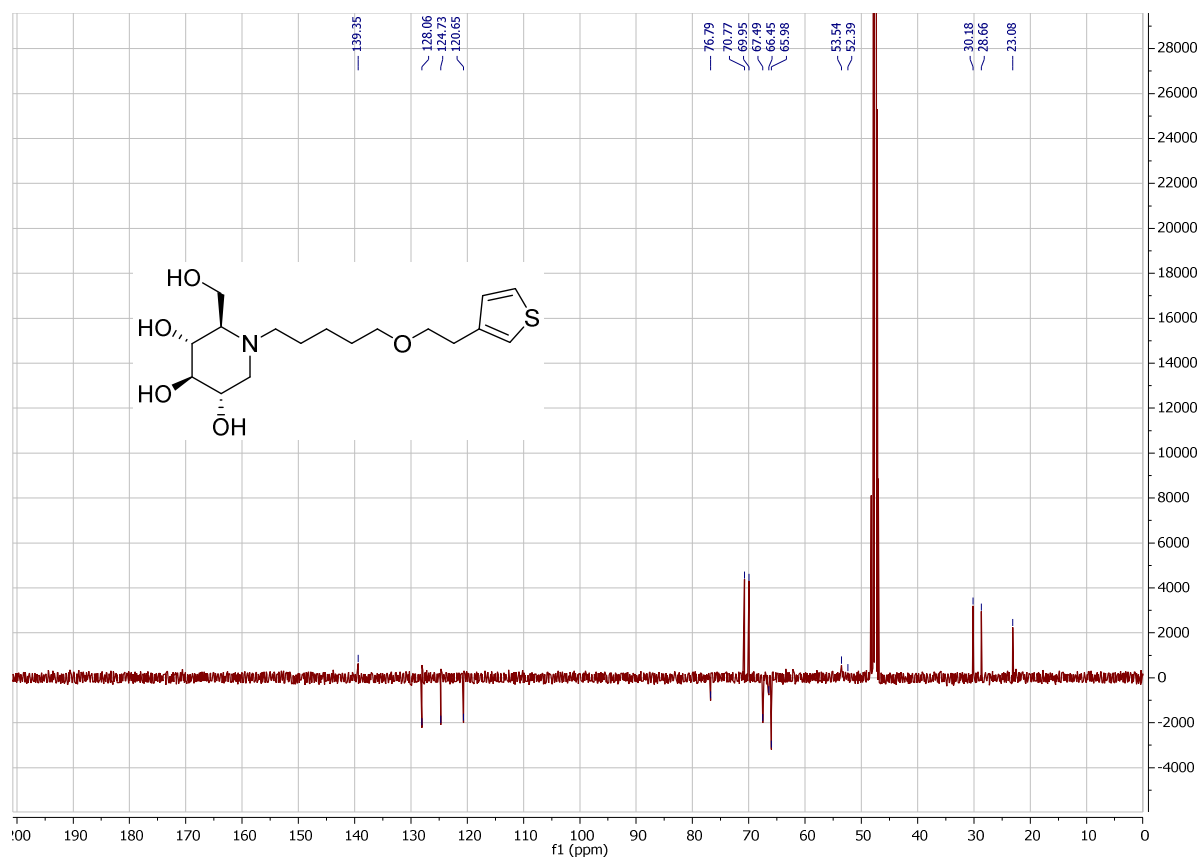





# <sup>1</sup>H-NMR and <sup>13</sup>C-NMR of compound B55/15 in MeOD.

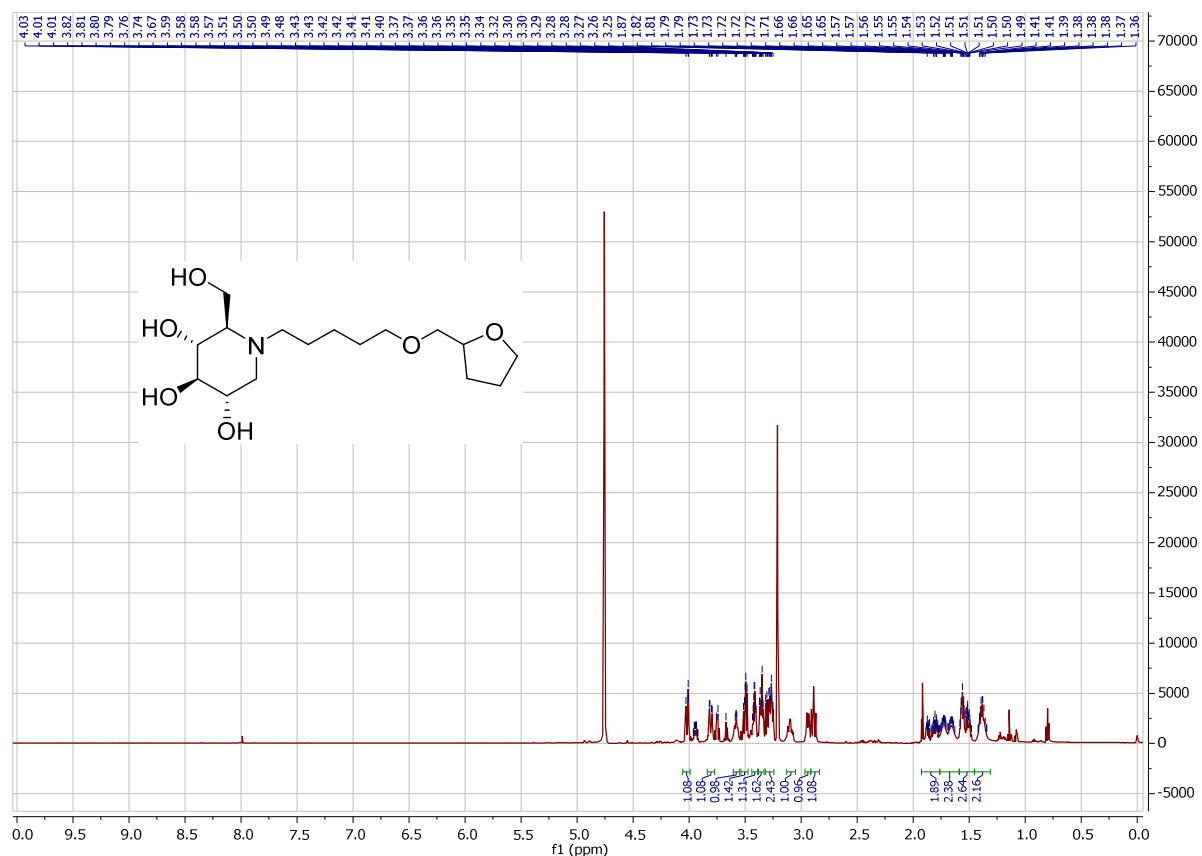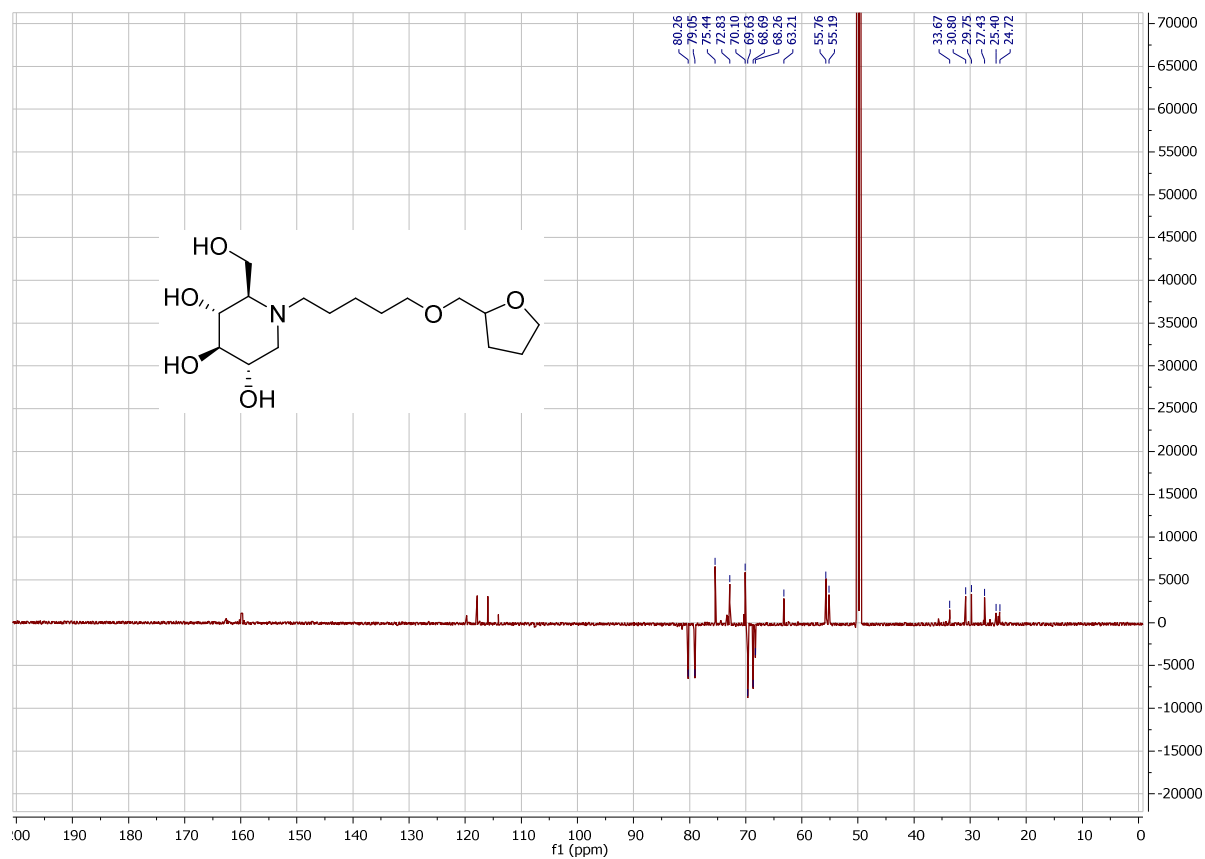

# $^1\text{H-NMR}$ and $^{13}\text{C-NMR}$ of compound B56/12 in MeOD.

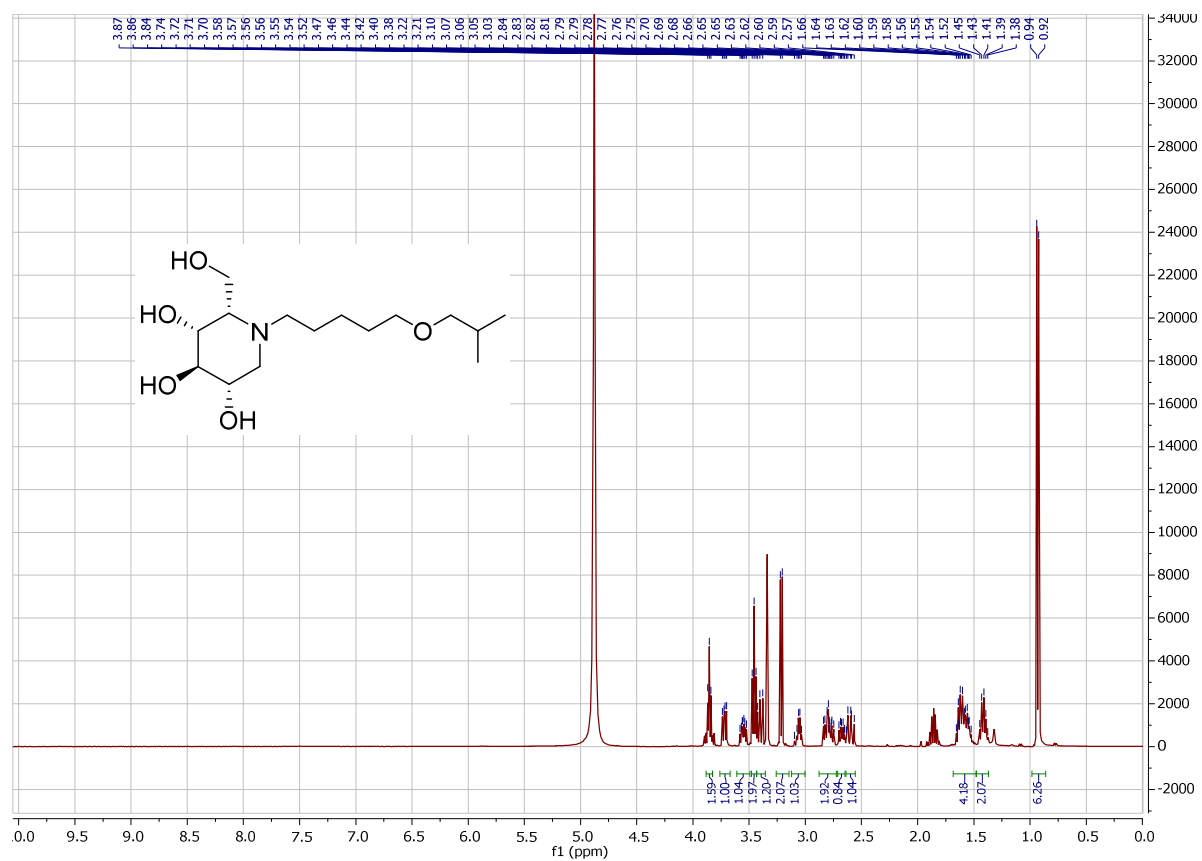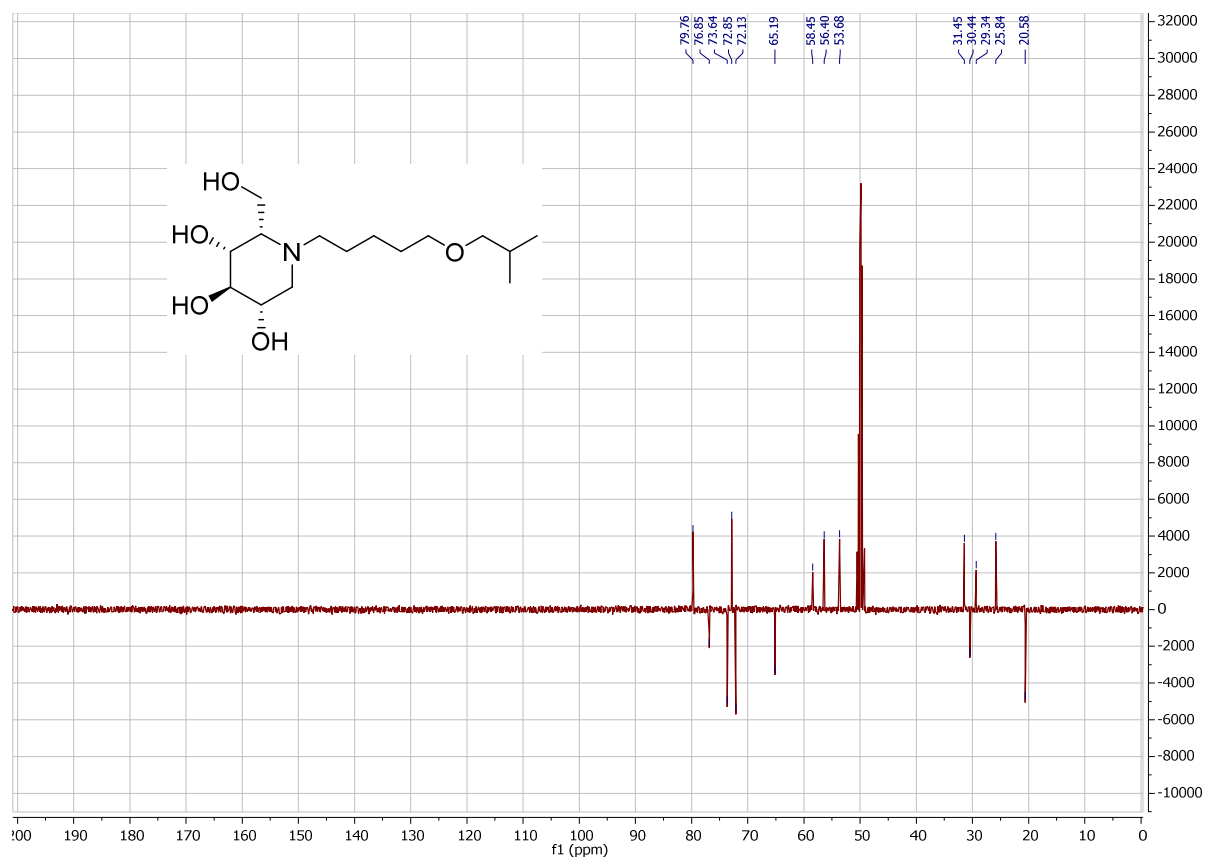

# $^1\text{H-NMR}$ and $^{13}\text{C-NMR}$ of compound B57 in MeOD.

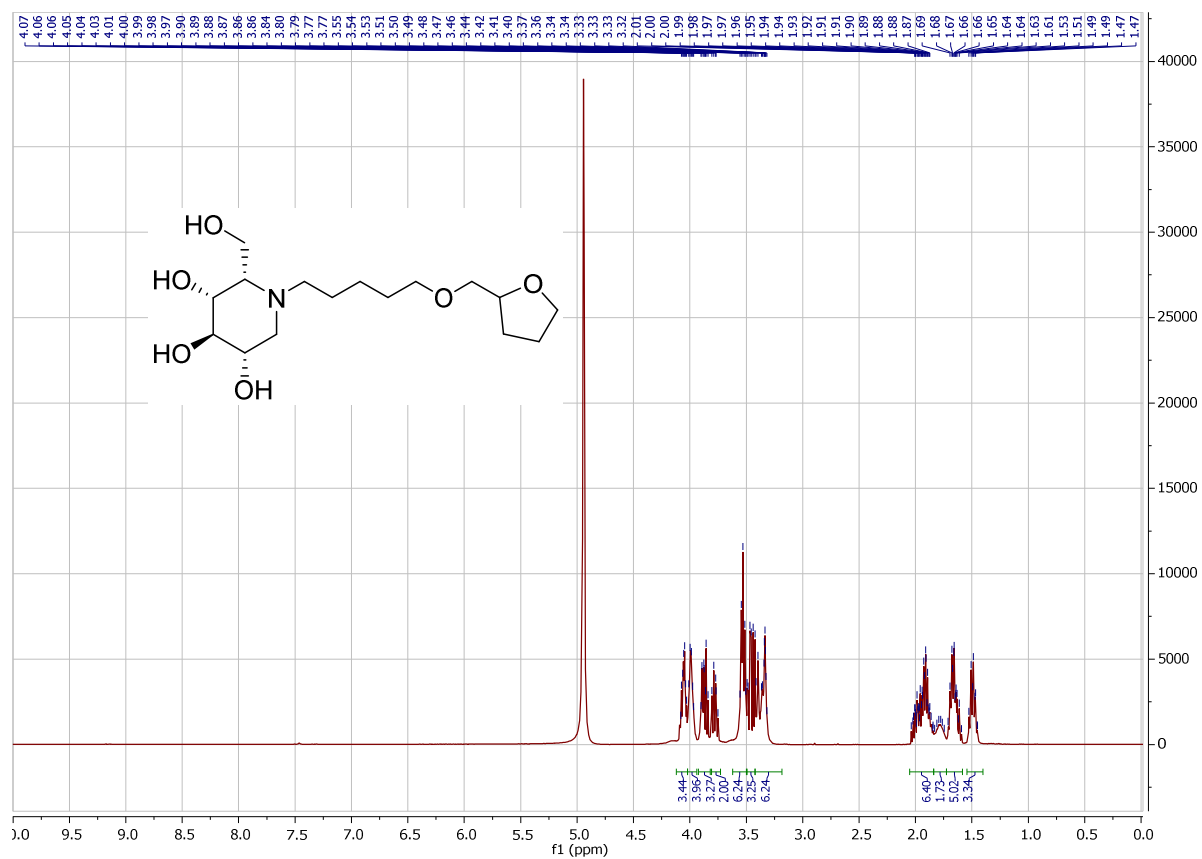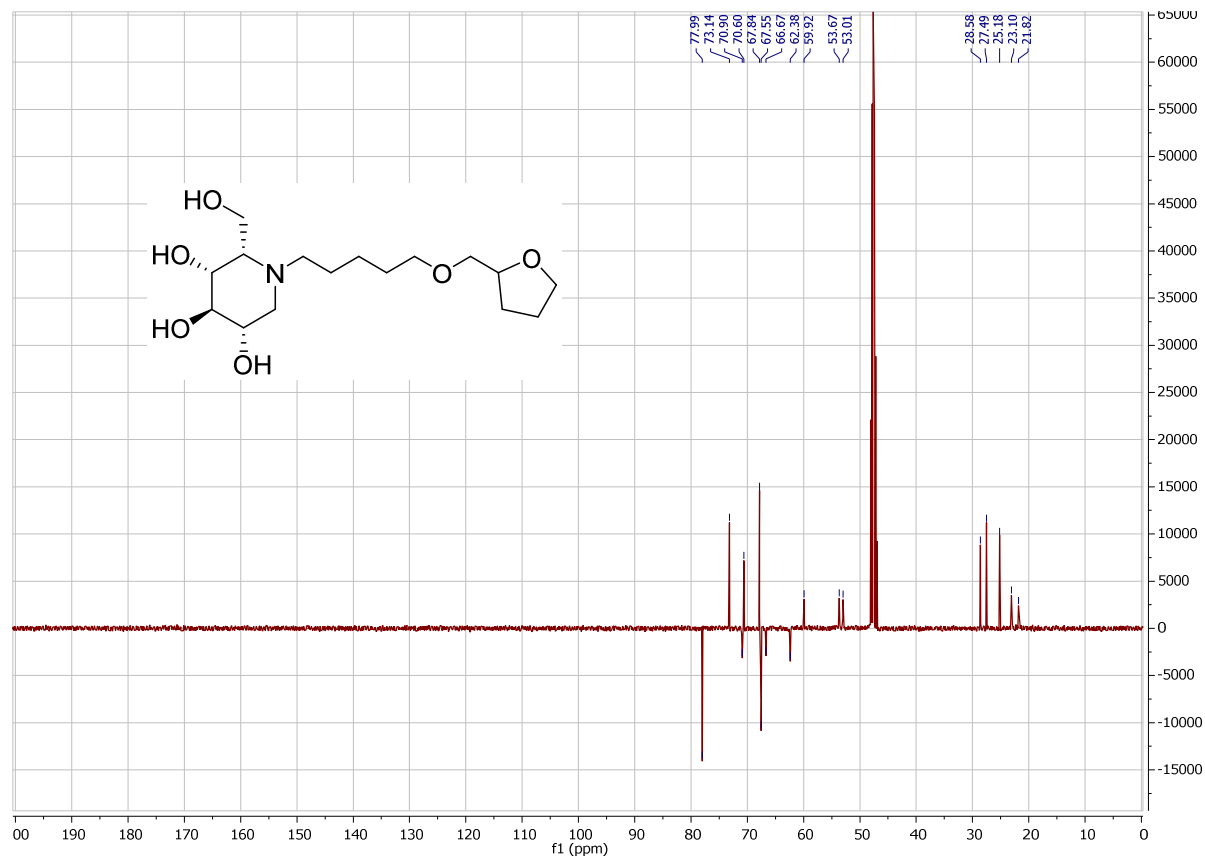

# $^1\text{H-NMR}$ and $^{13}\text{C-NMR}$ of compound B58 in MeOD.

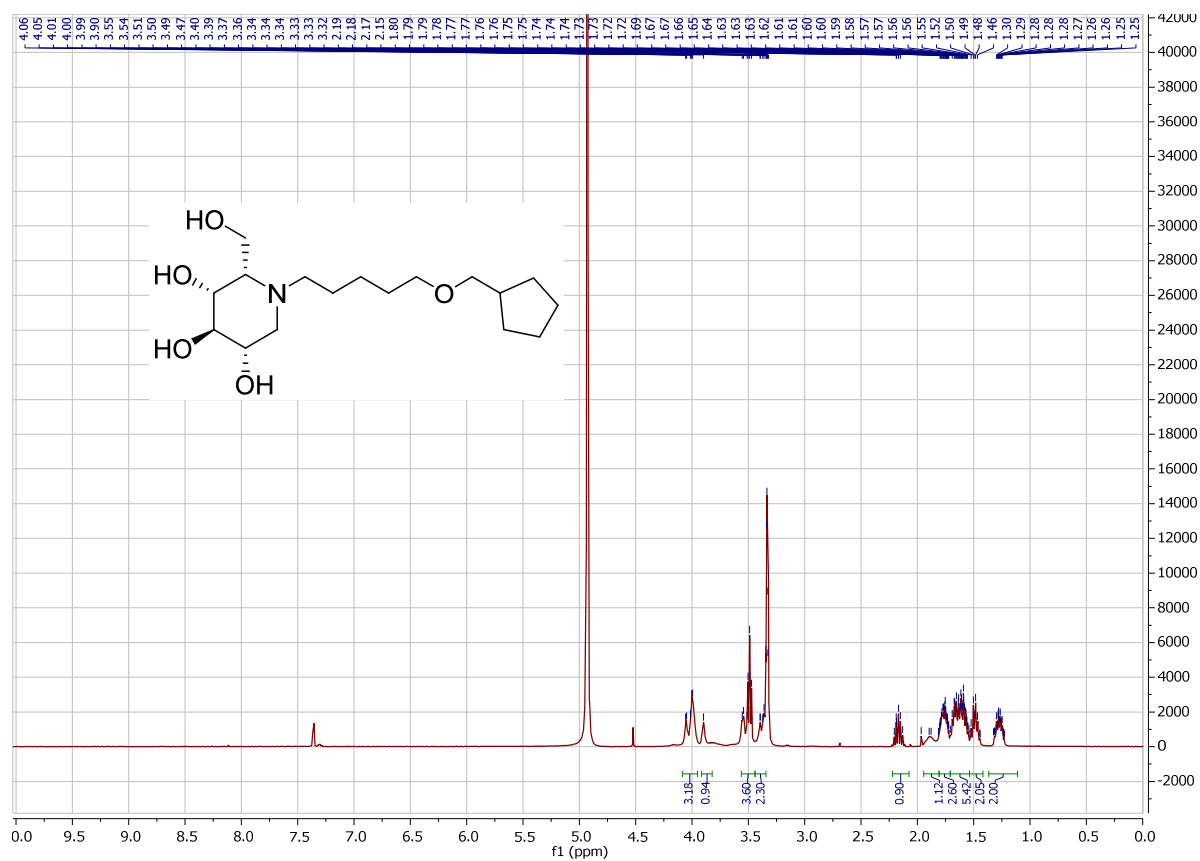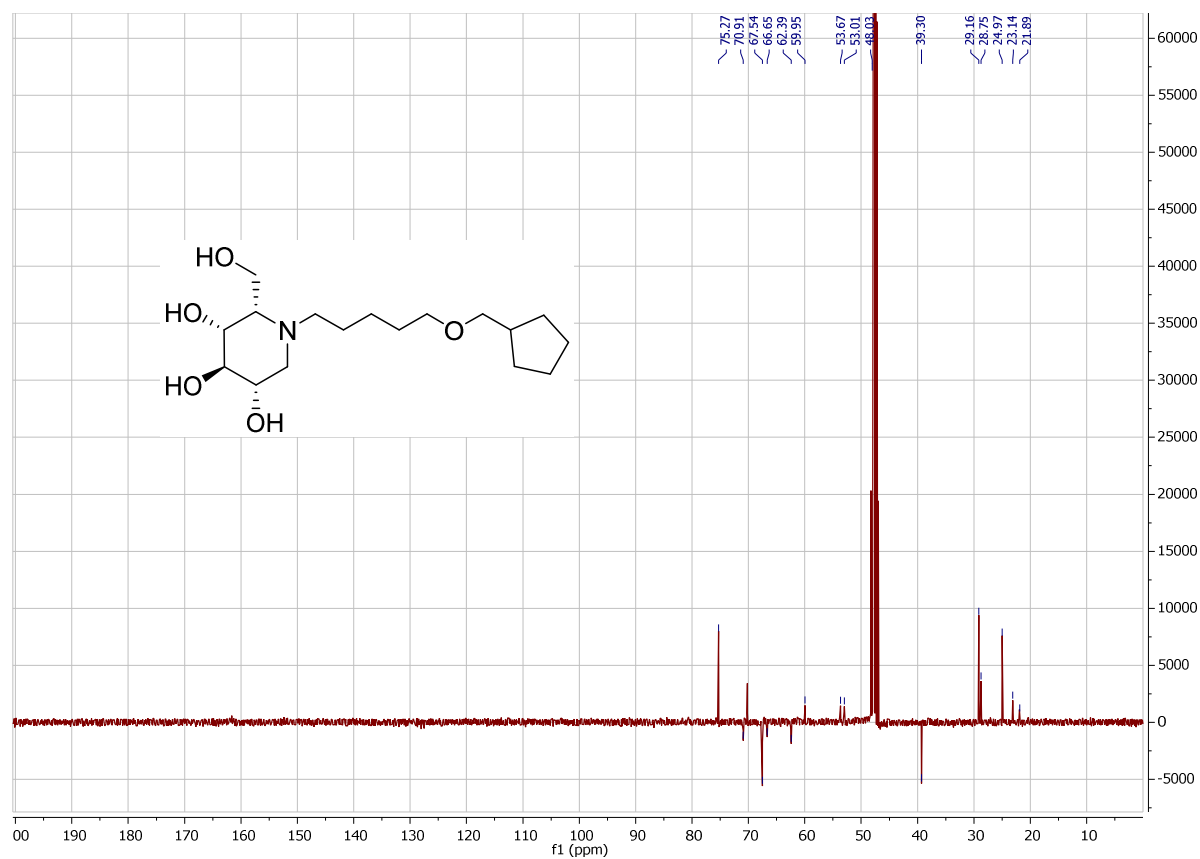

# $^1\text{H-NMR}$ and $^{13}\text{C-NMR}$ of compound B59 in MeOD.

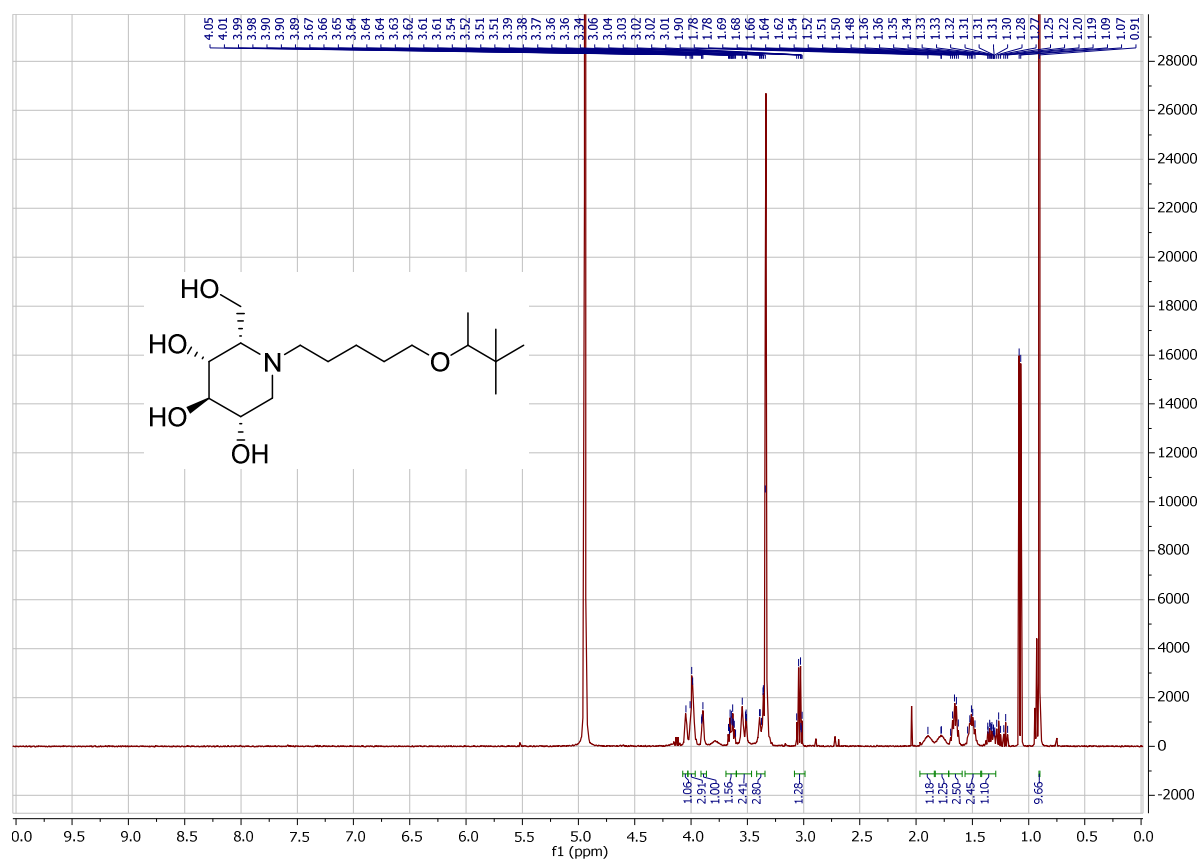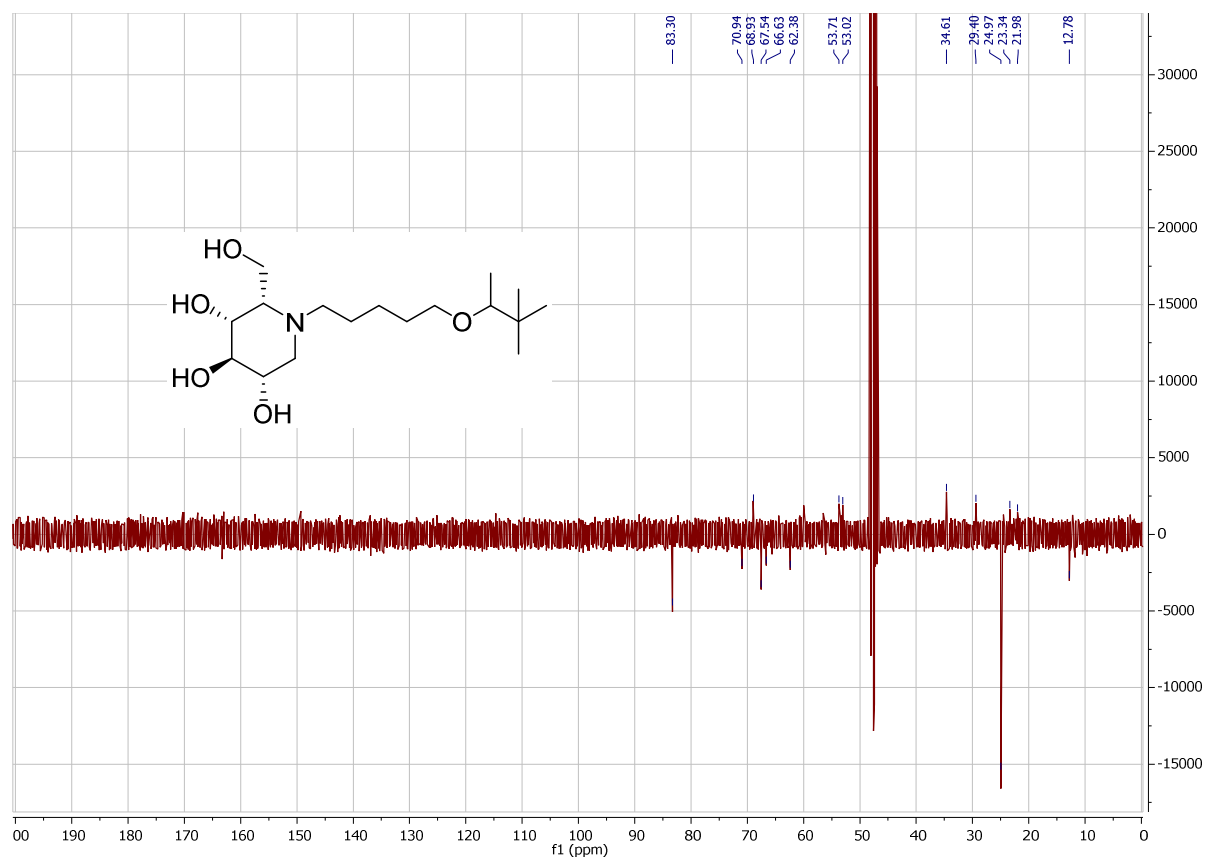

# $^1\text{H-NMR}$ and $^{13}\text{C-NMR}$ of compound B60 in MeOD.

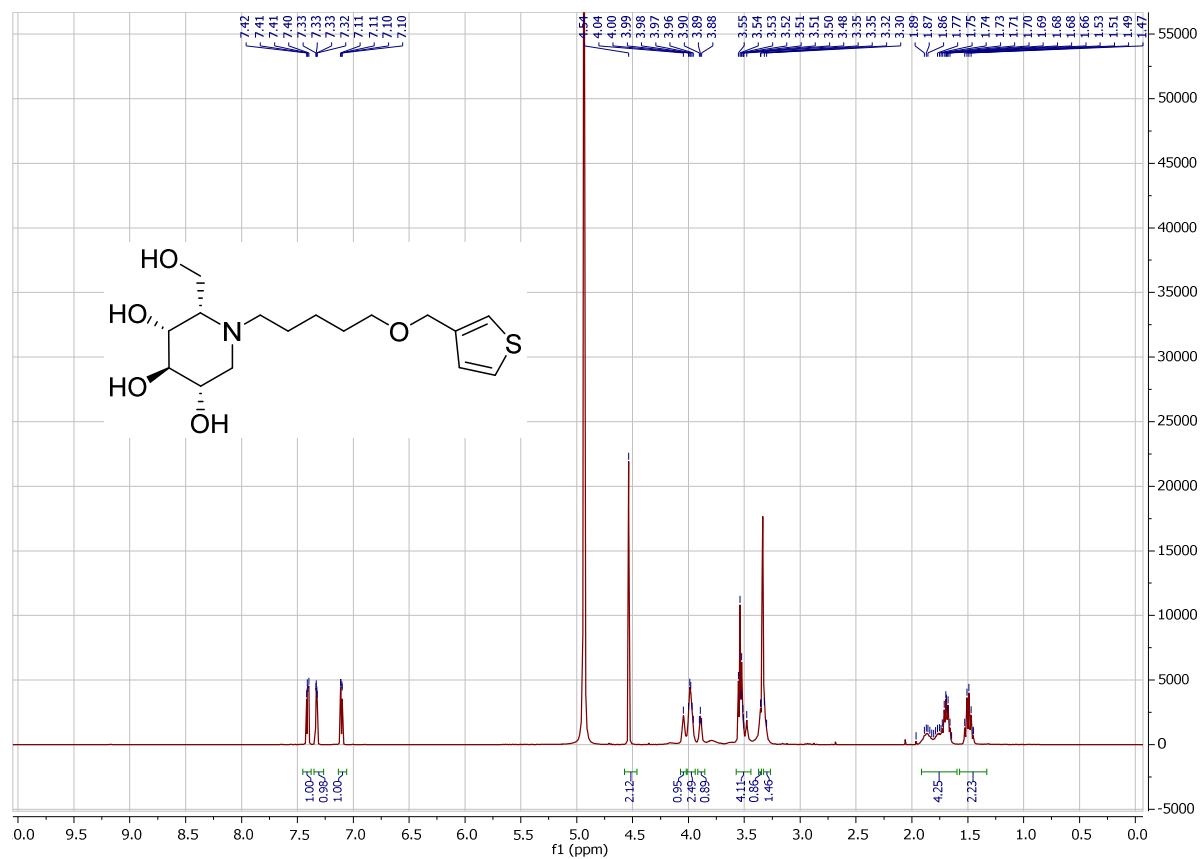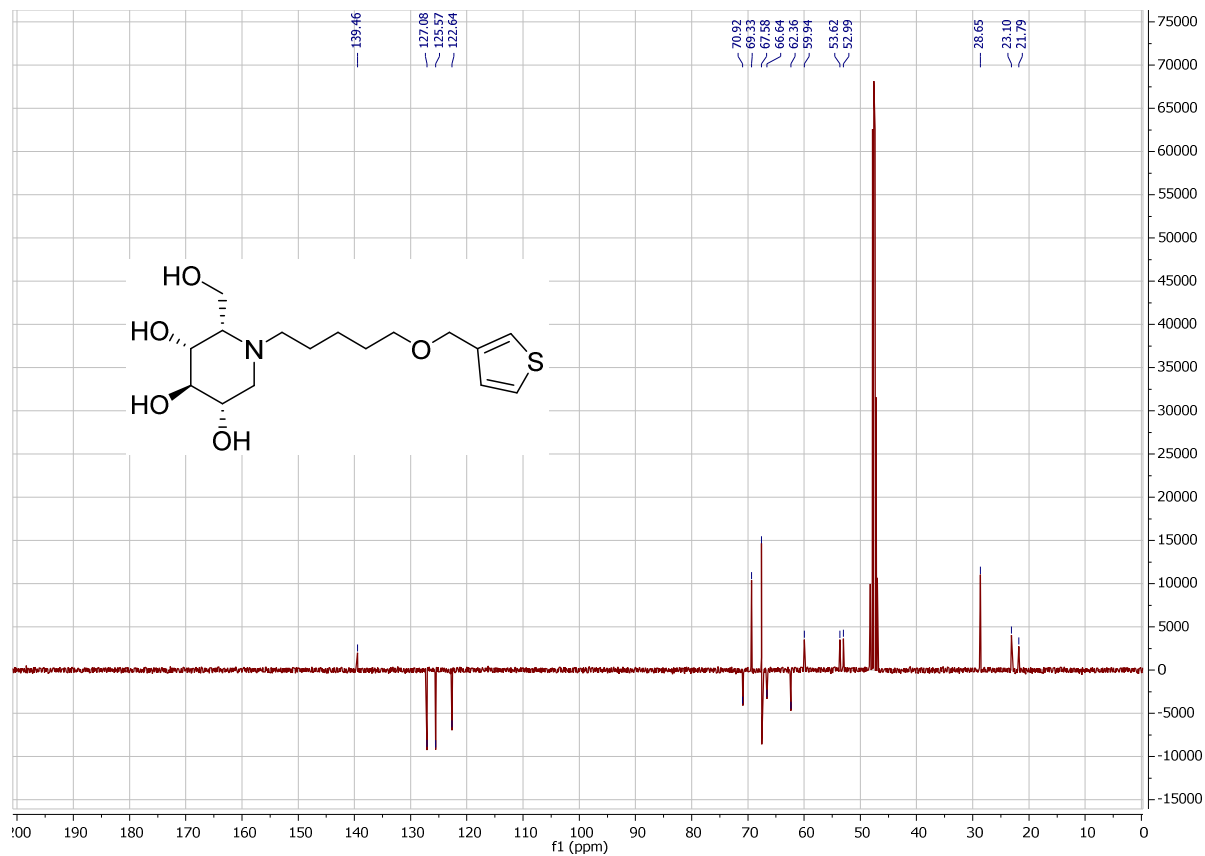

# $^1\text{H-NMR}$ and $^{13}\text{C-NMR}$ of compound B61 in MeOD.

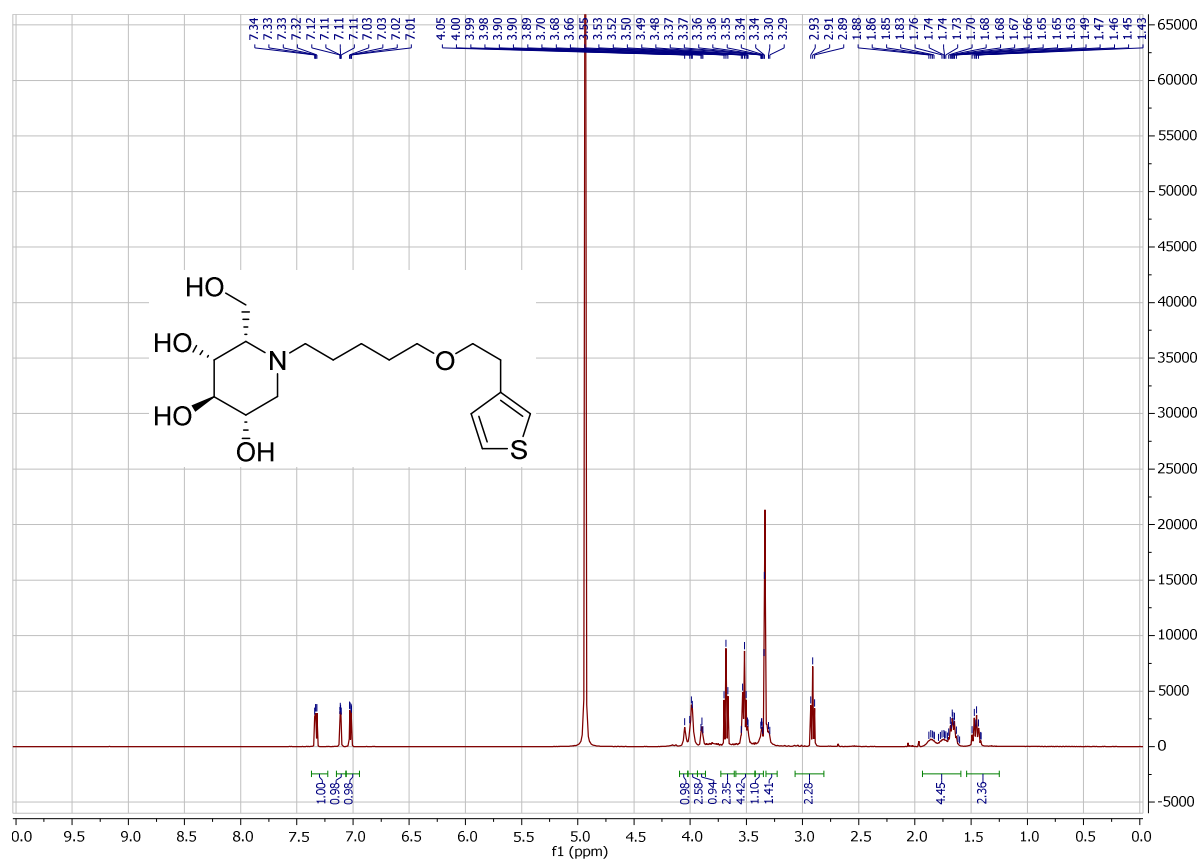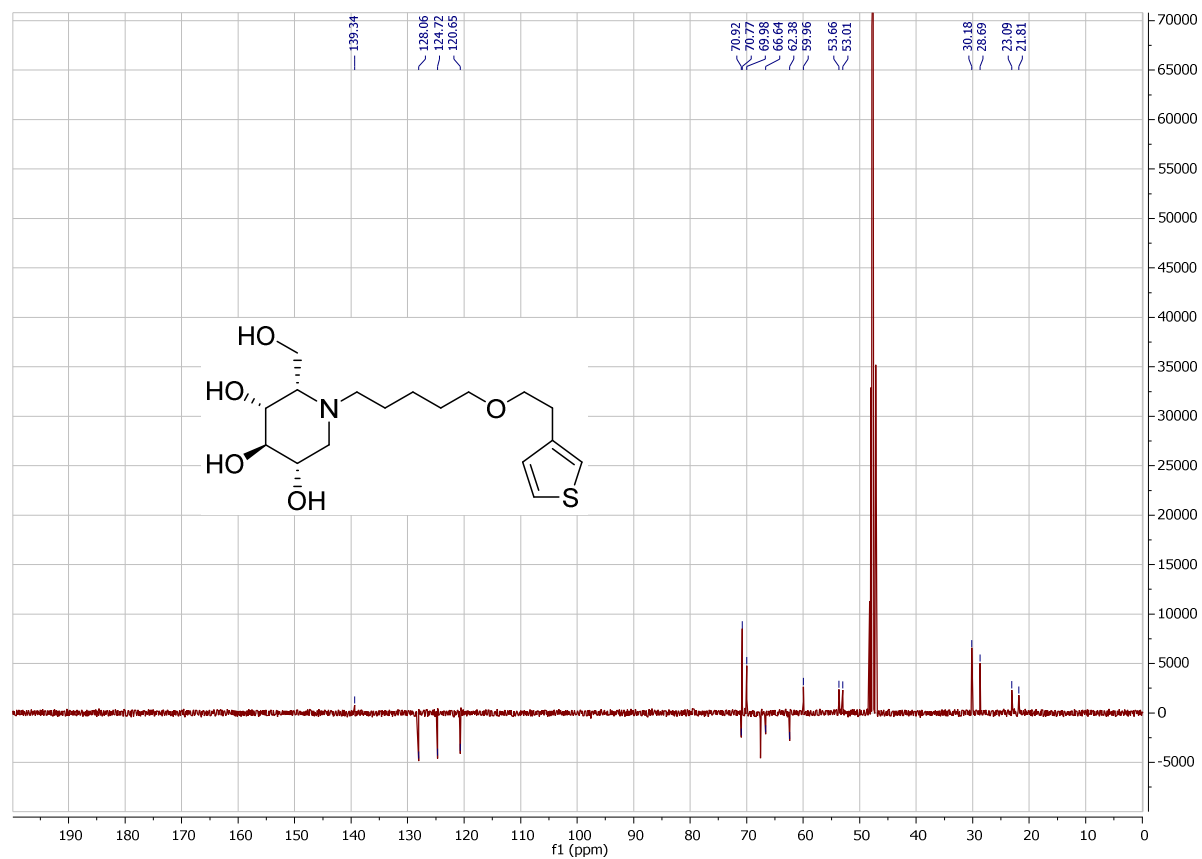



# $^1\text{H-NMR}$ and $^{13}\text{C-NMR}$ of compound C15.TFA in $\text{D}_2\text{O}$ .

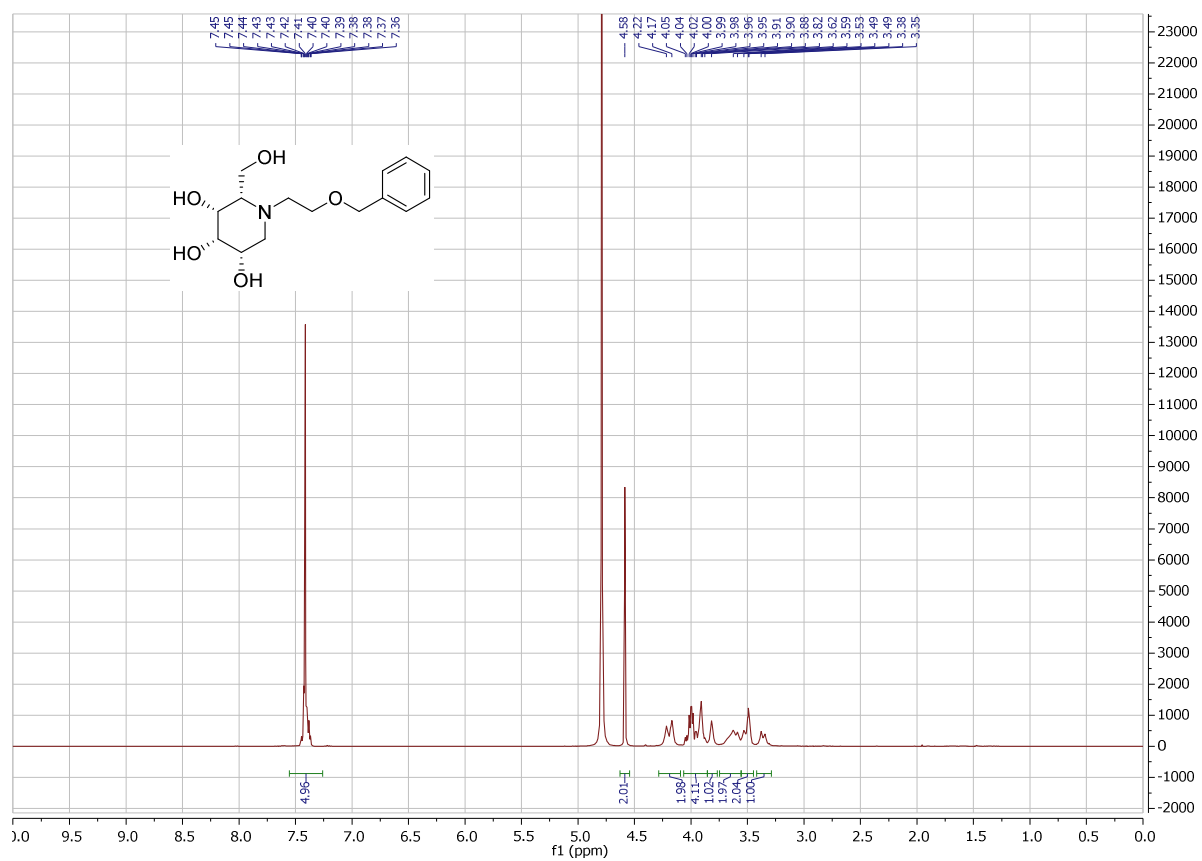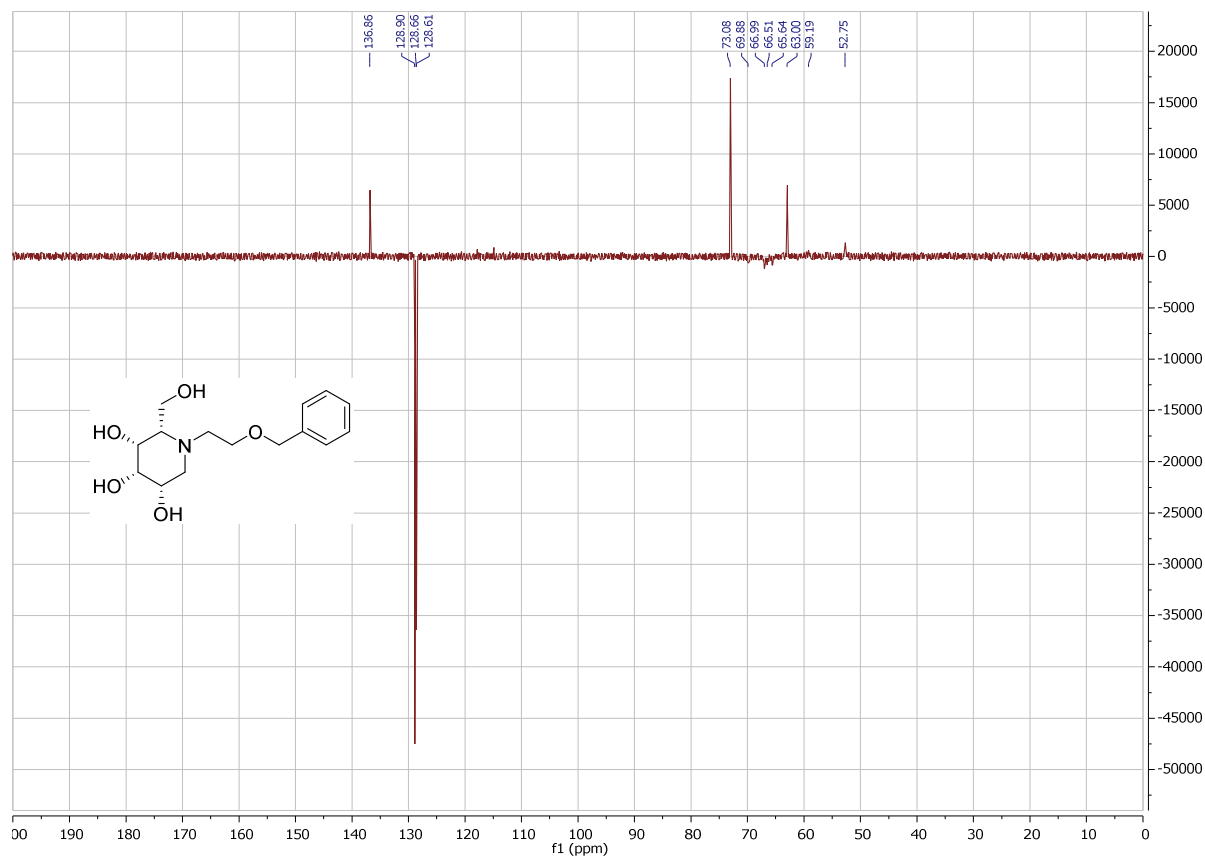

# $^1\text{H-NMR}$ and $^{13}\text{C-NMR}$ of compound C16.TFA in MeOD/ $\text{CDCl}_3$ .

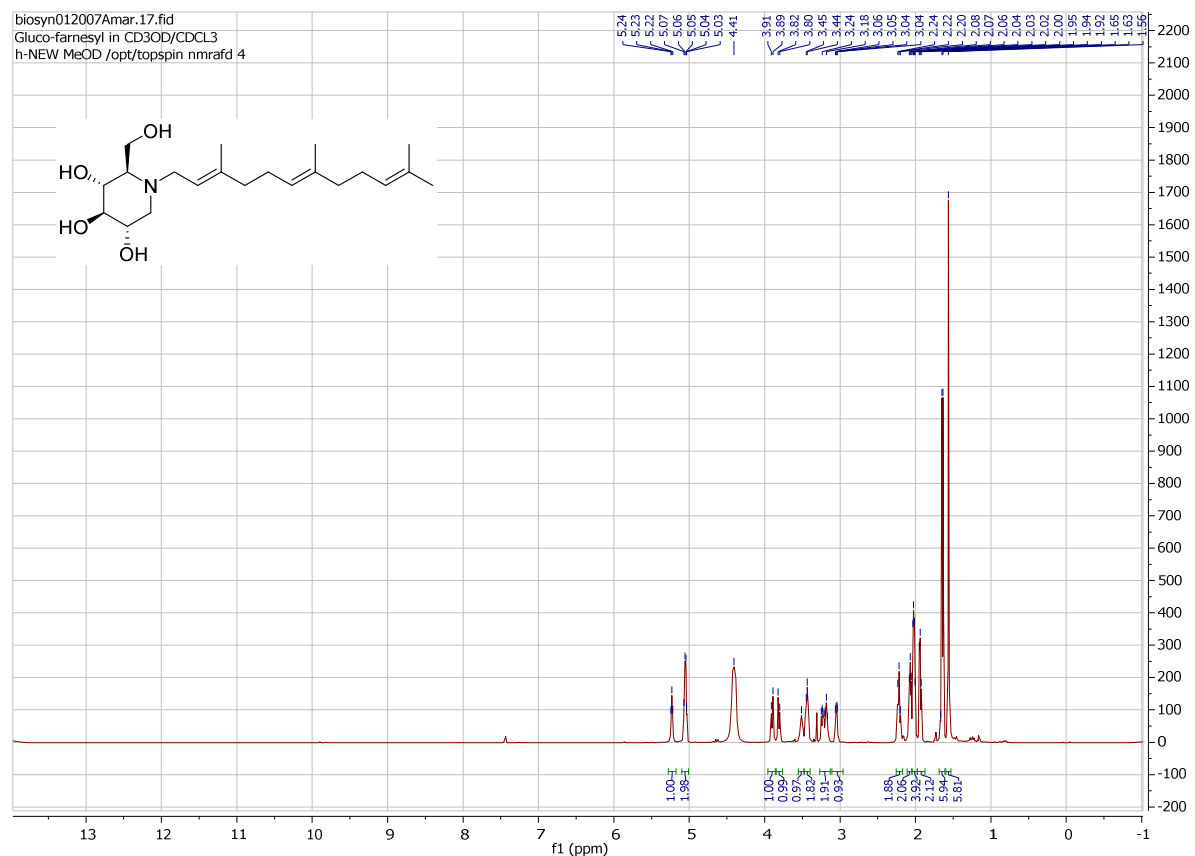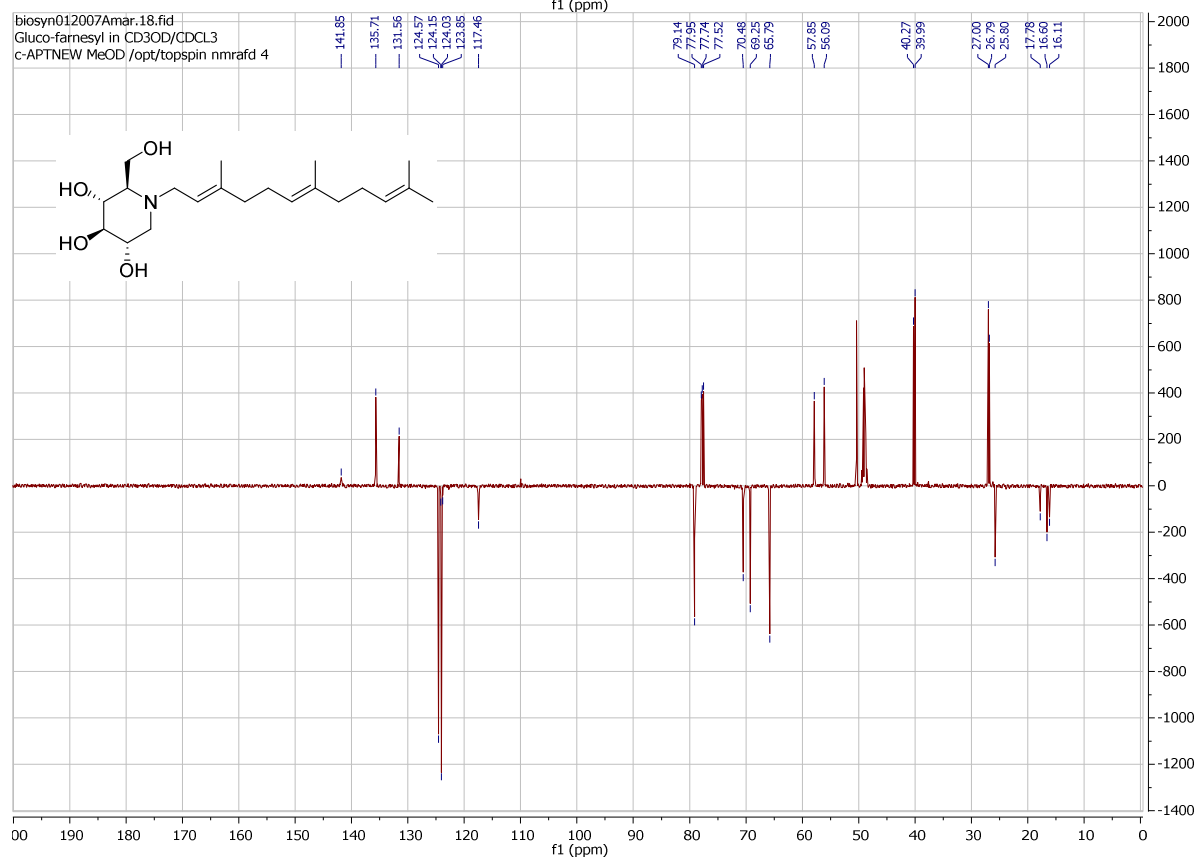

# $^1\text{H-NMR}$ and $^{13}\text{C-NMR}$ of compound C24.TFA in $\text{D}_2\text{O}$ .

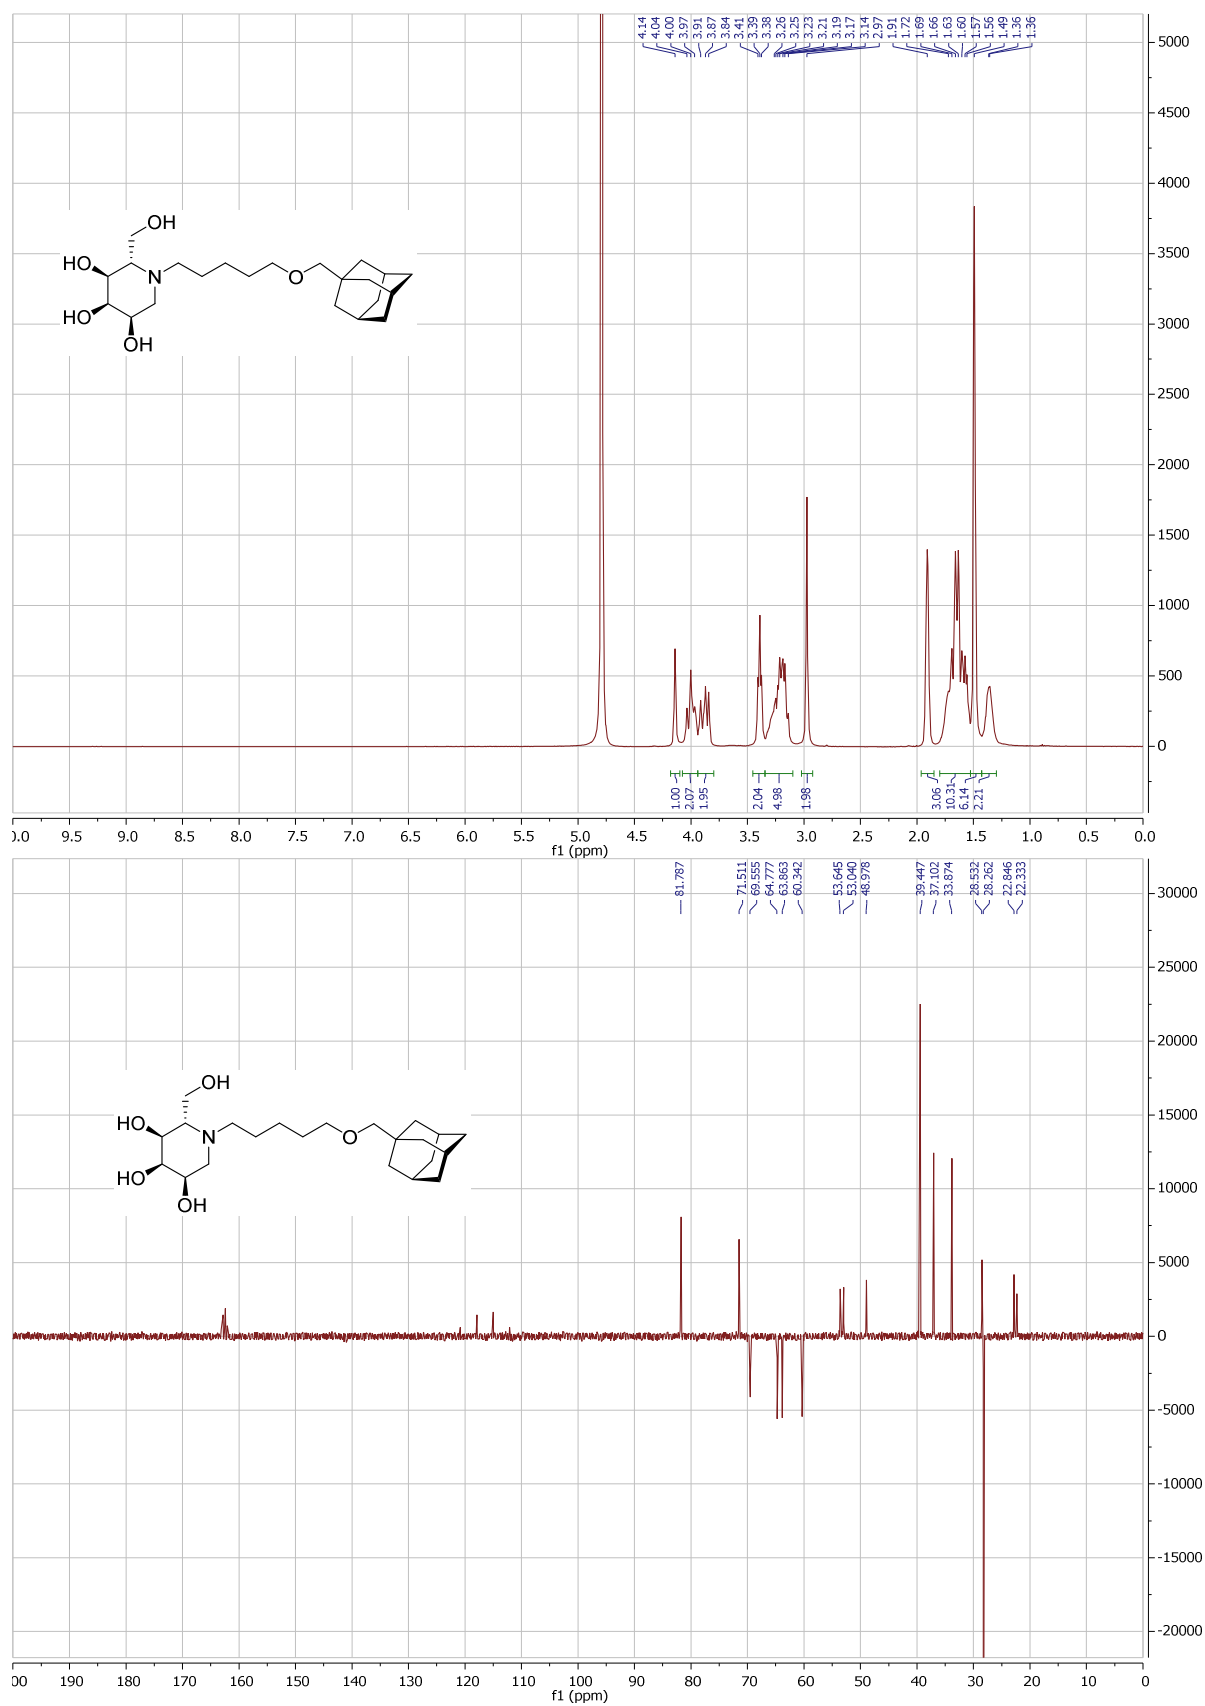

# $^1\text{H-NMR}$ and $^{13}\text{C-NMR}$ of compound C26.TFA in MeOD.

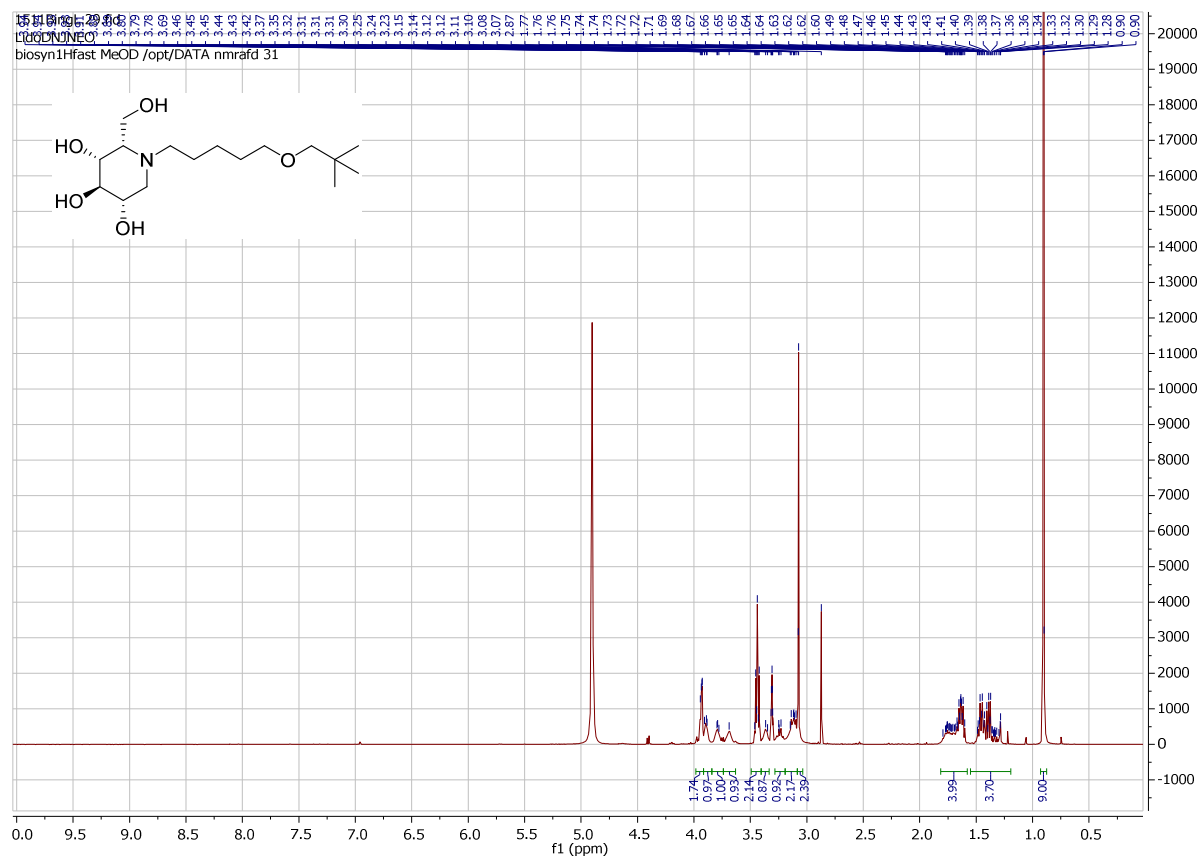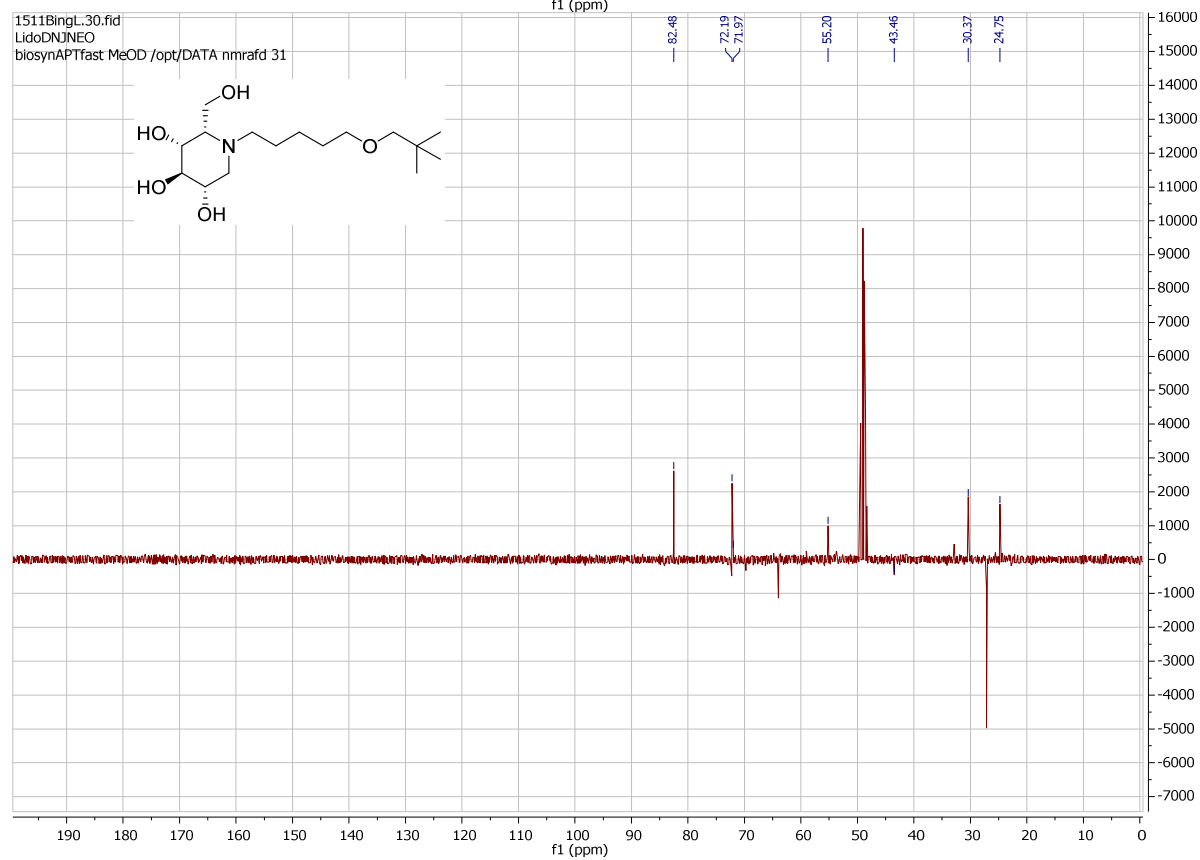

**<sup>1</sup>H-NMR and <sup>13</sup>C-NMR of compound C47.TFA in MeOD.**

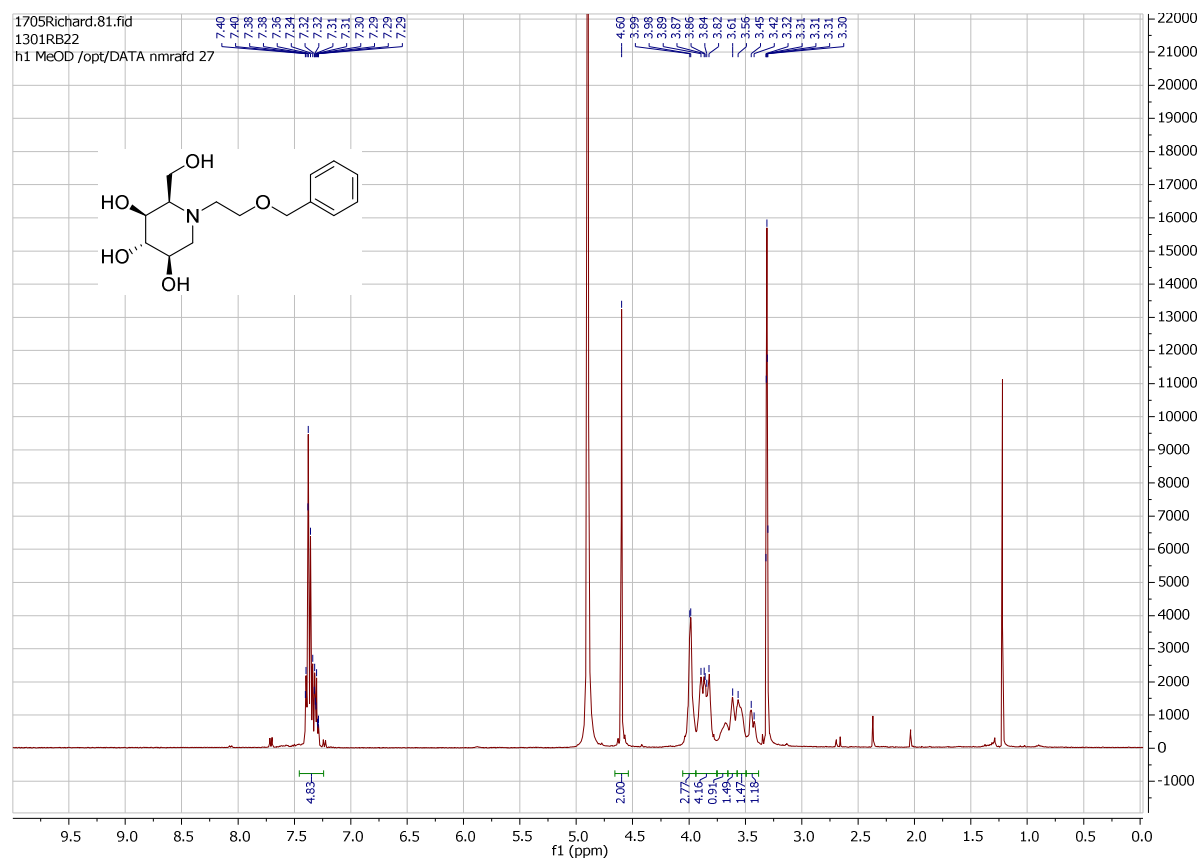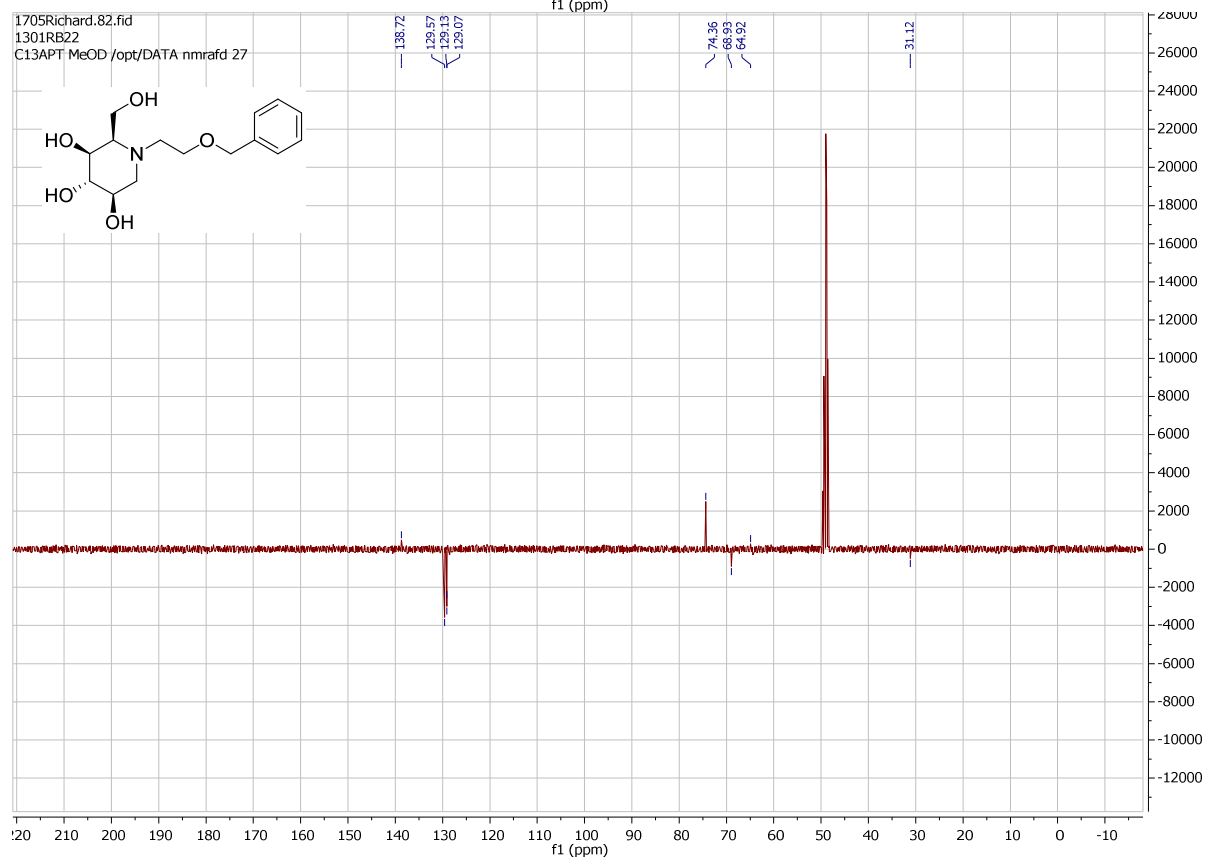

# <sup>1</sup>H-NMR and <sup>13</sup>C-NMR of compound C49.TFA in MeOD.

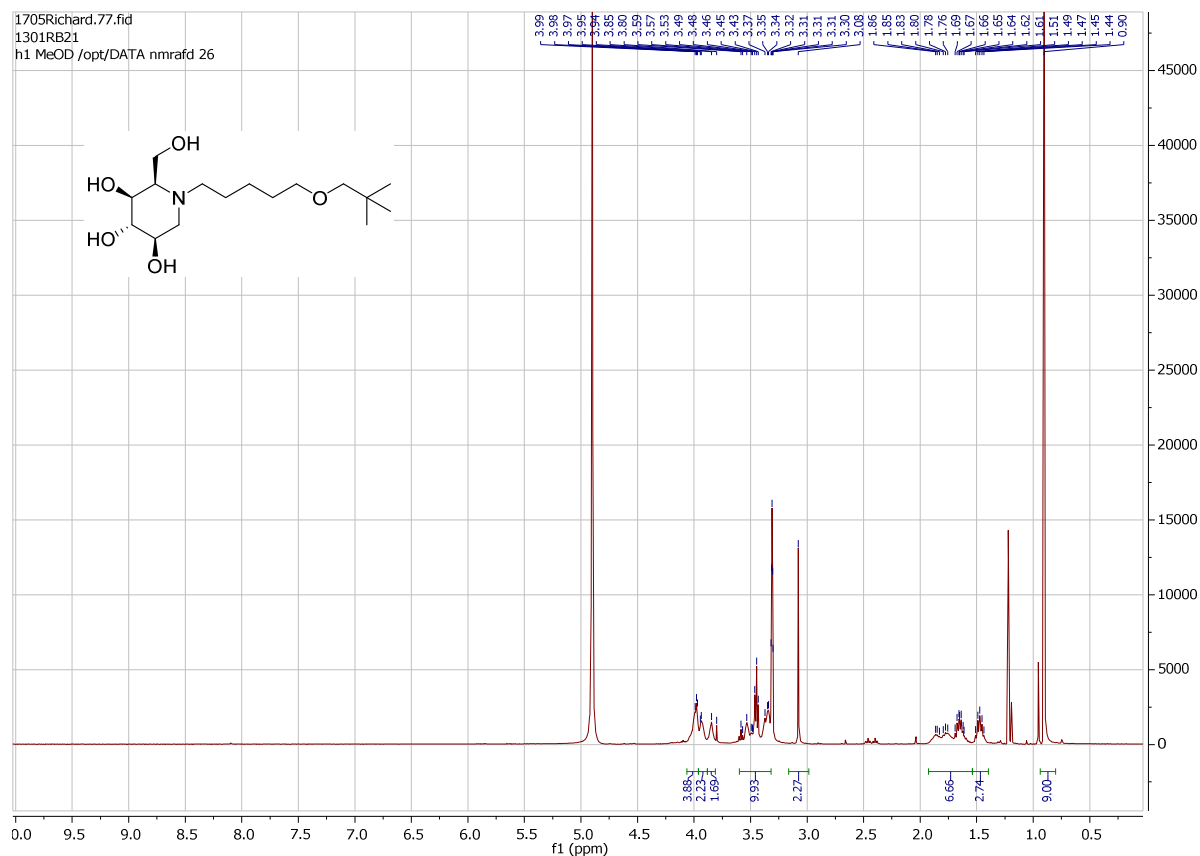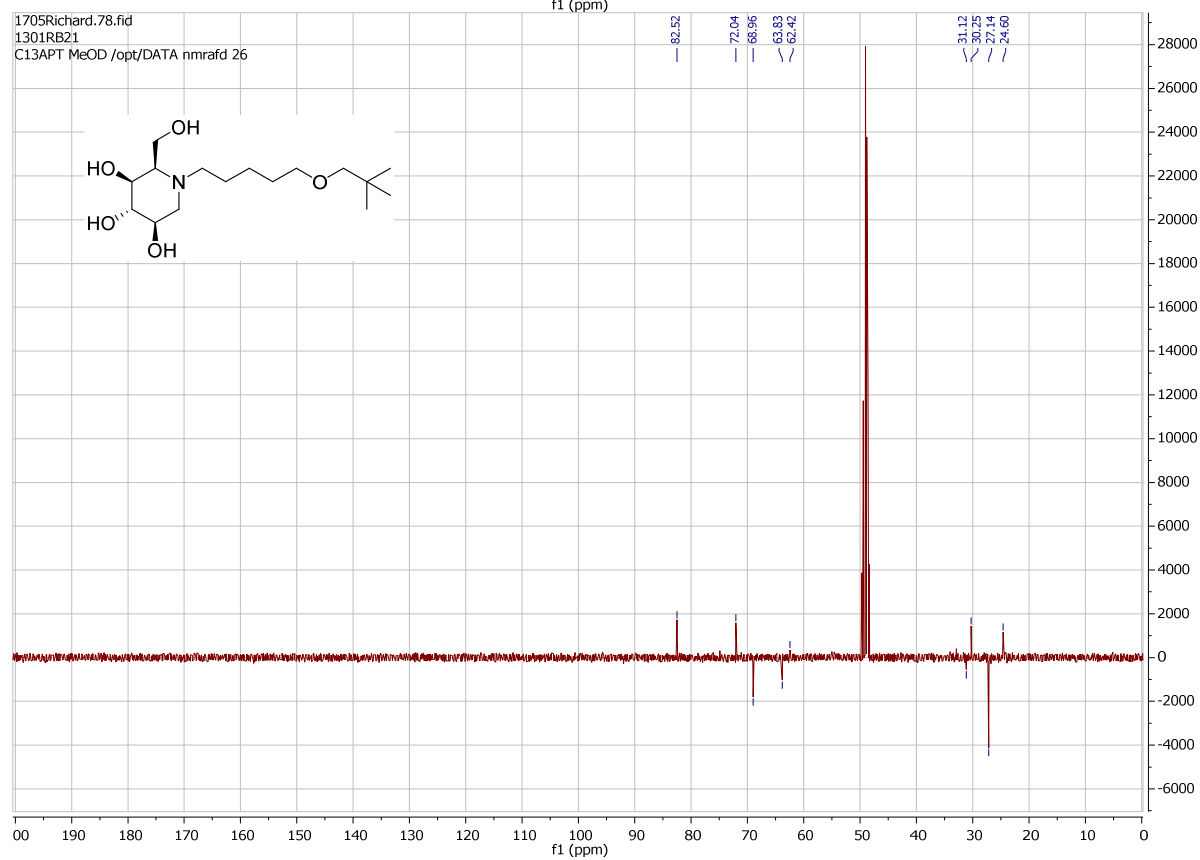







# $^1\text{H-NMR}$ and $^{13}\text{C-NMR}$ of compound C54.TFA in MeOD/ $\text{CDCl}_3$ .

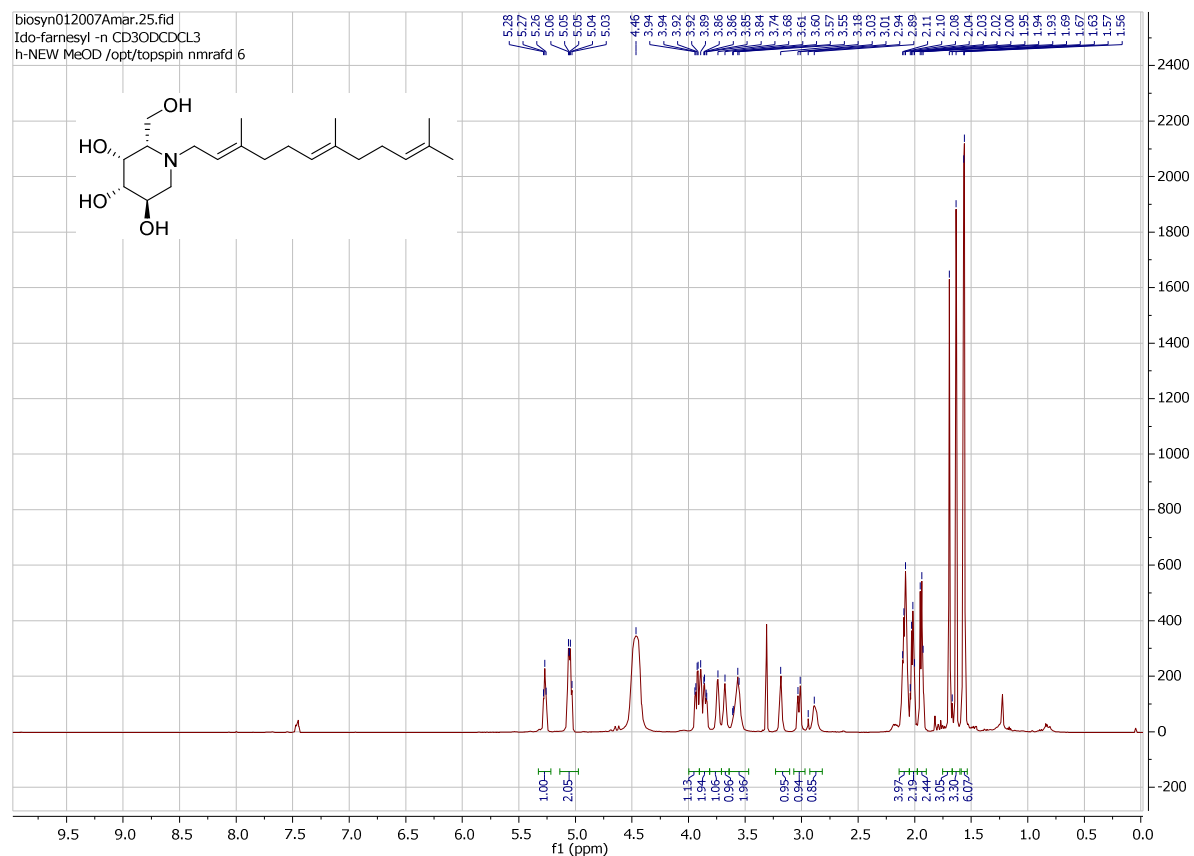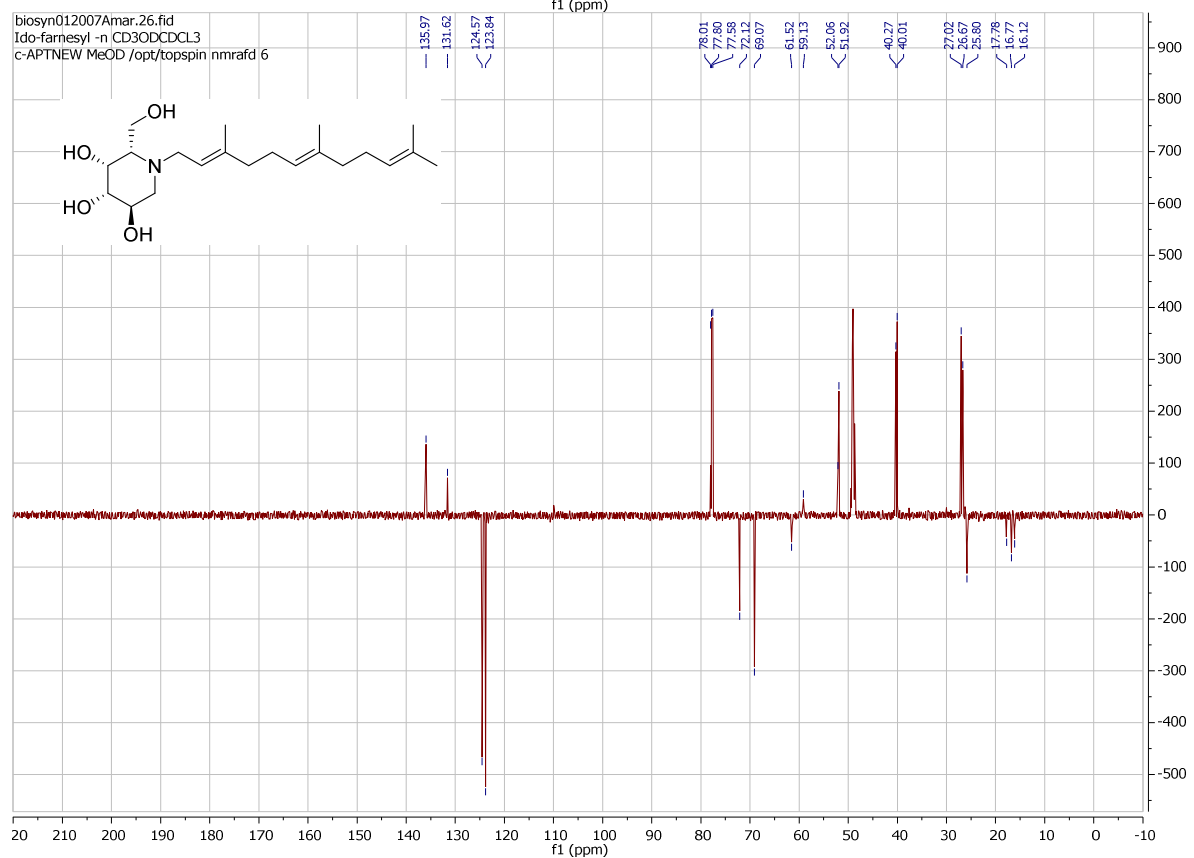

**<sup>1</sup>H-NMR and <sup>13</sup>C-NMR of compound C76.TFA in MeOD.**

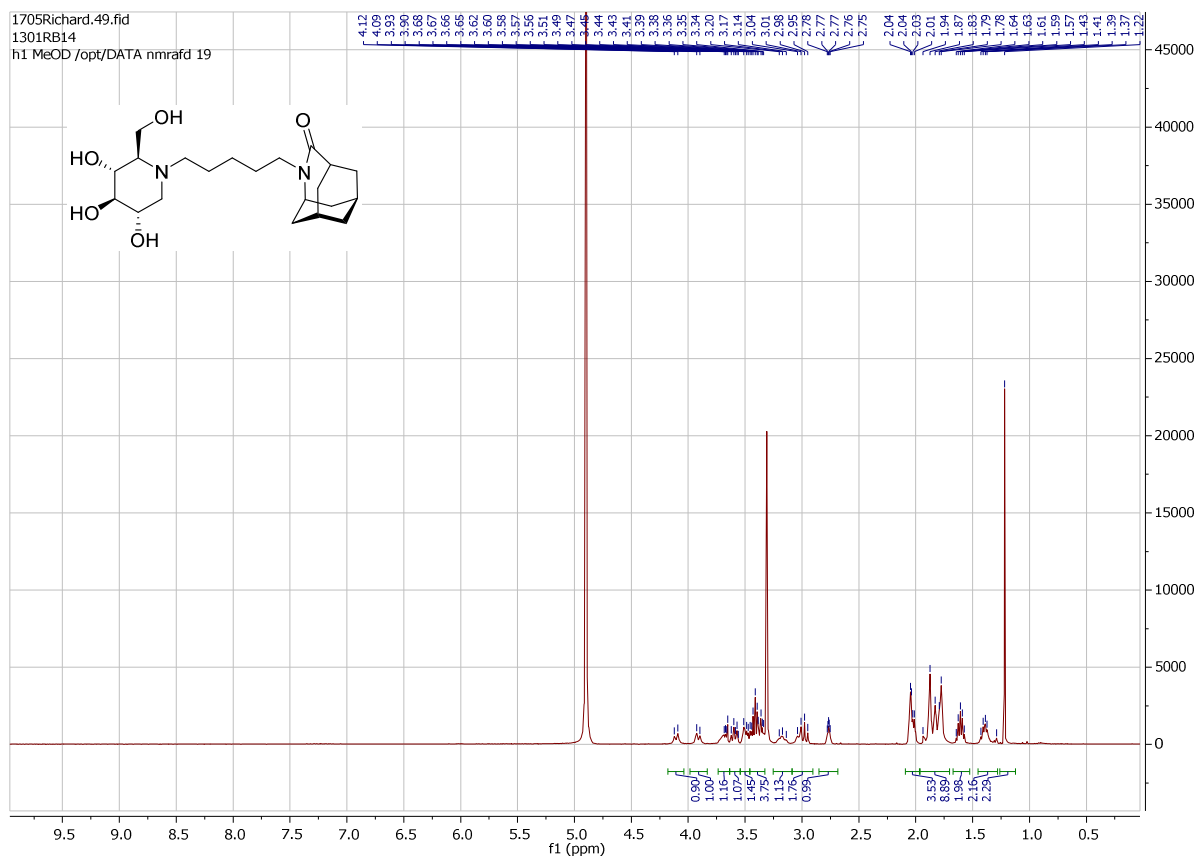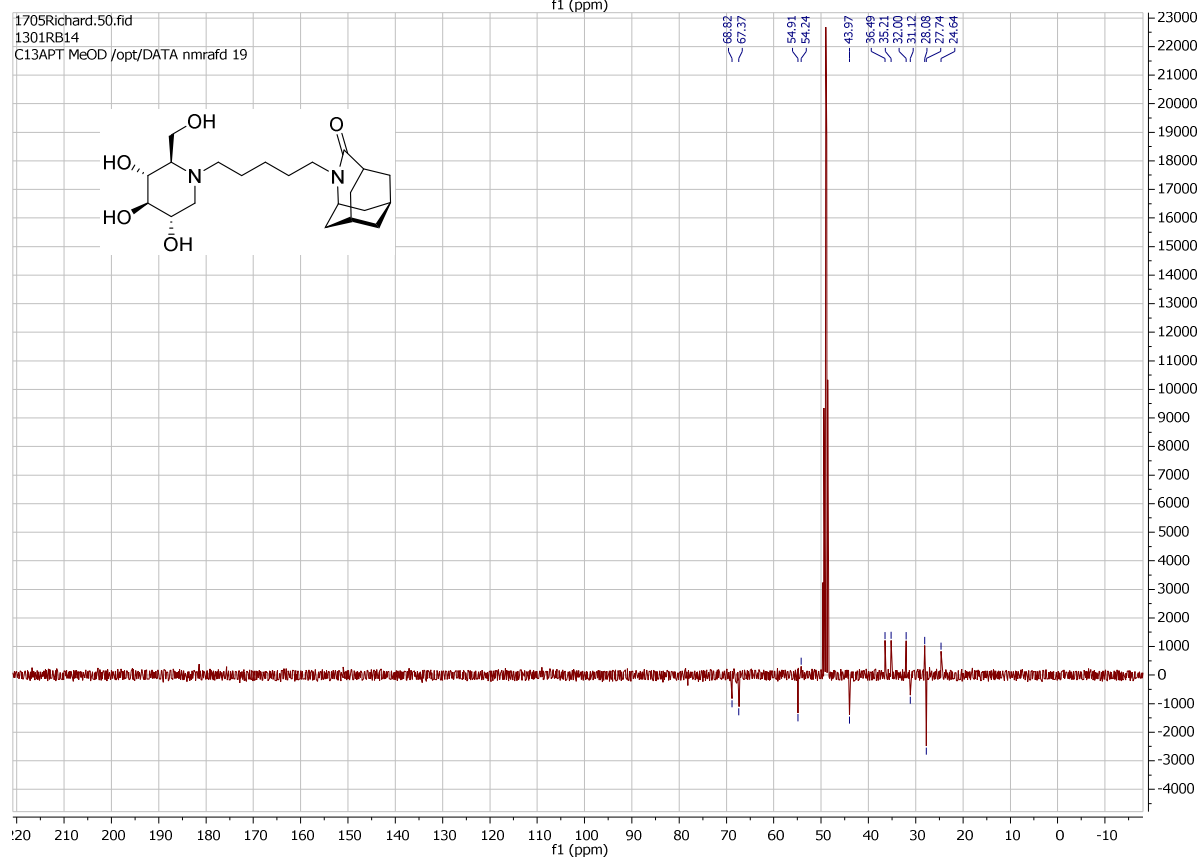



**<sup>1</sup>H-NMR and <sup>13</sup>C-NMR of compound C85.TFA in MeOD.**

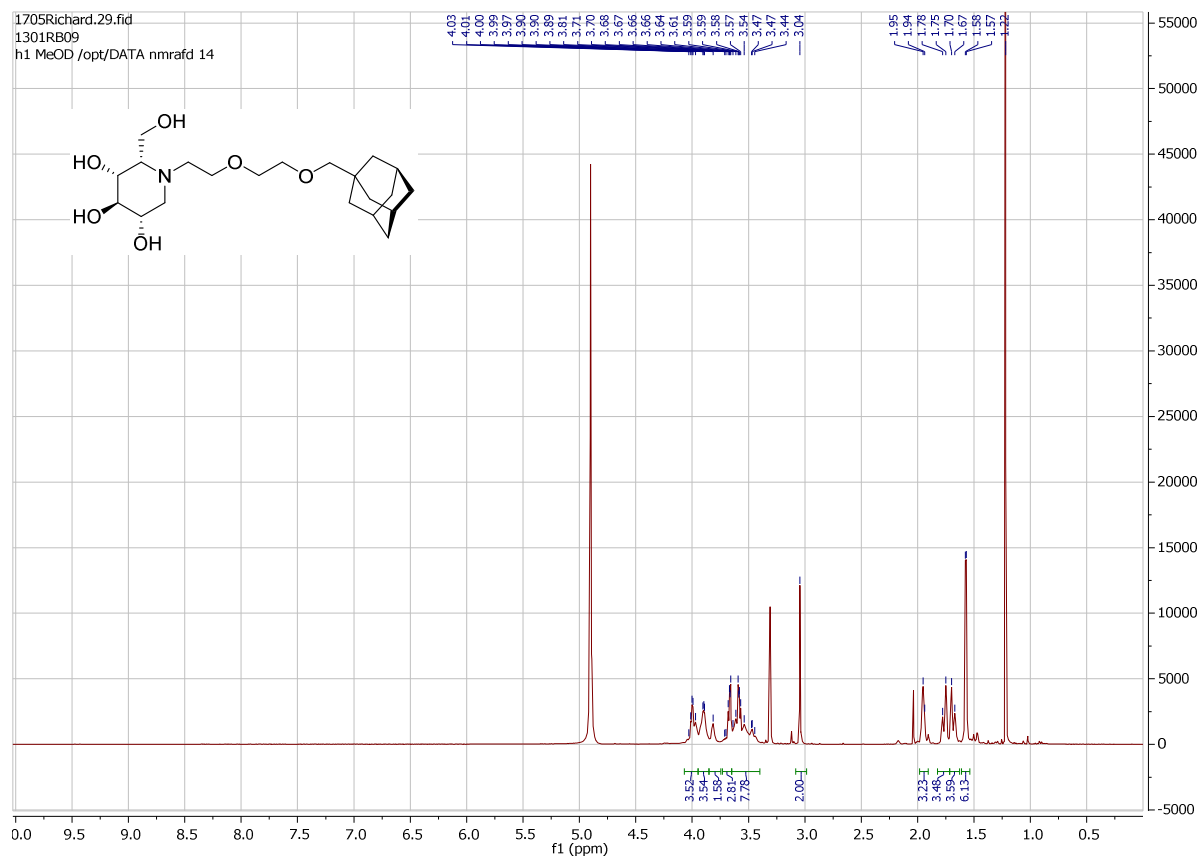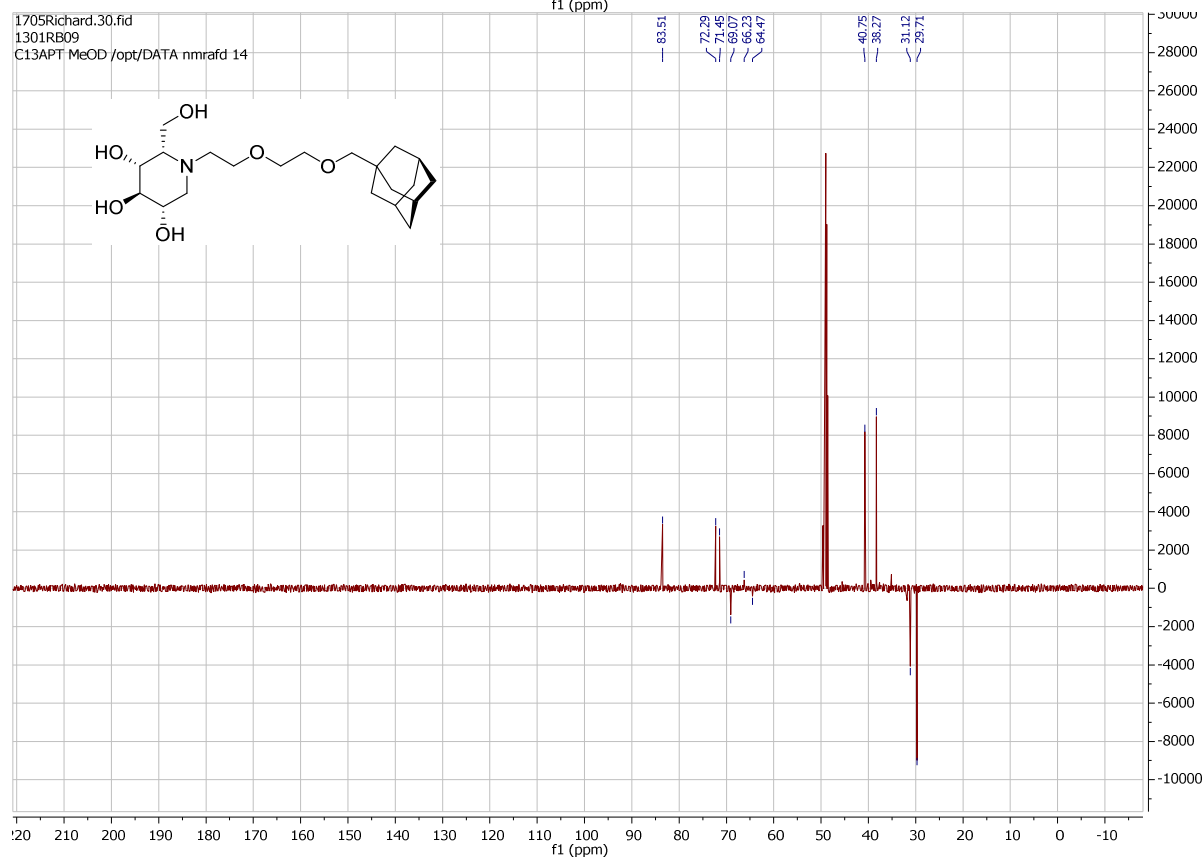

# <sup>1</sup>H-NMR and <sup>13</sup>C-NMR of compound C87.TFA in MeOD.

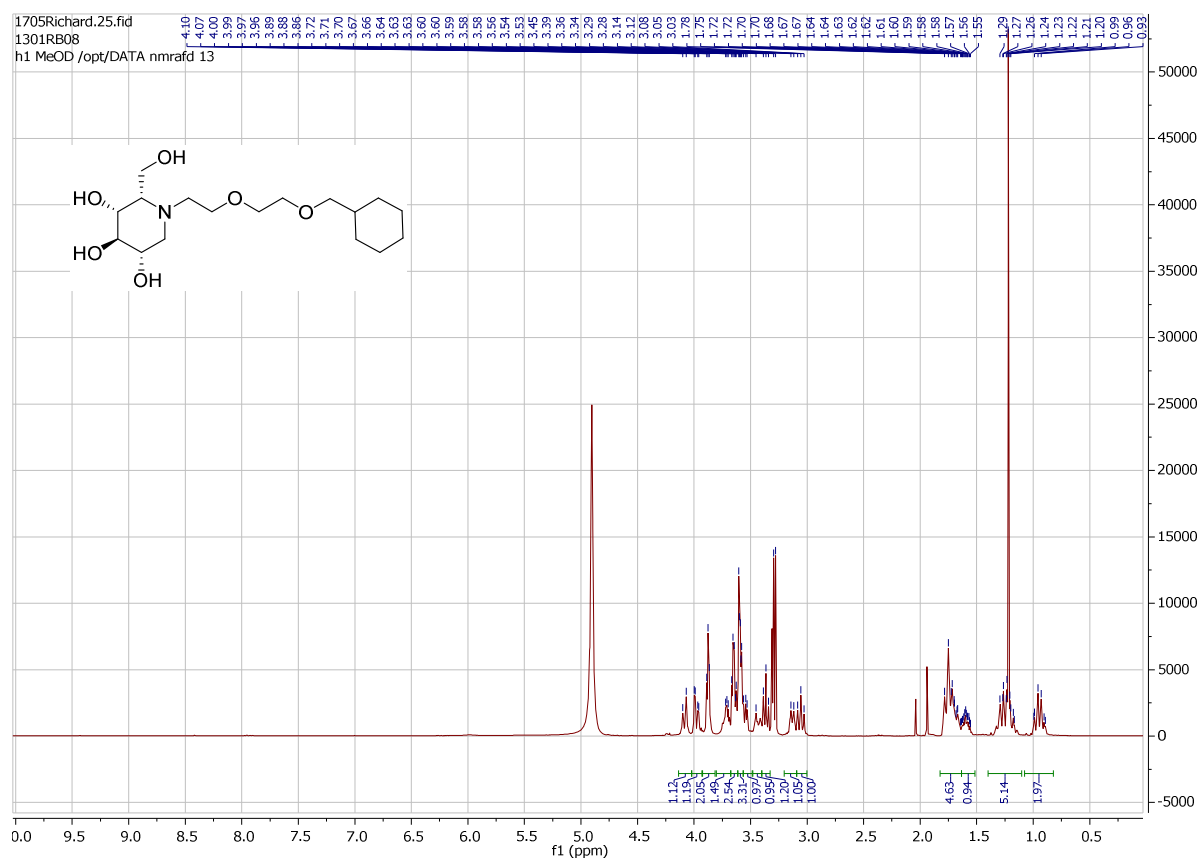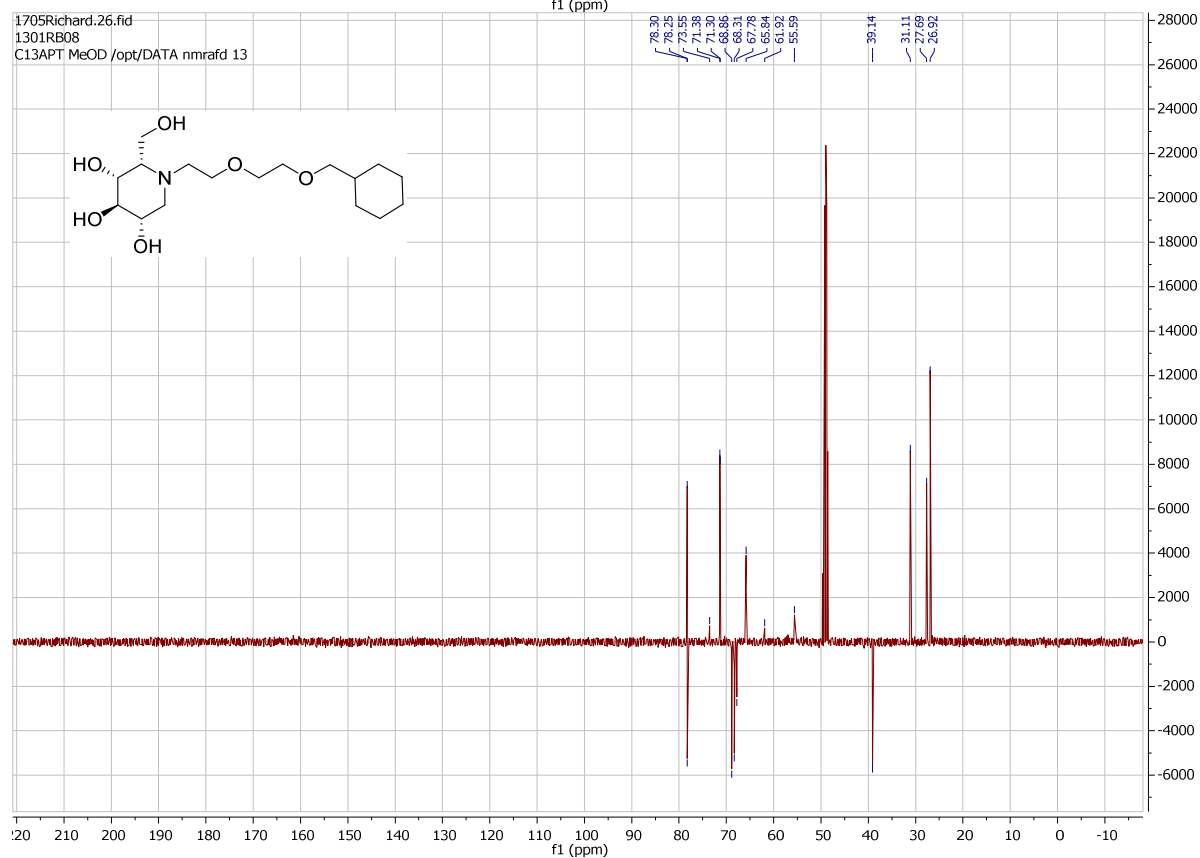

**<sup>1</sup>H-NMR and <sup>13</sup>C-NMR of compound C89.TFA in MeOD.**

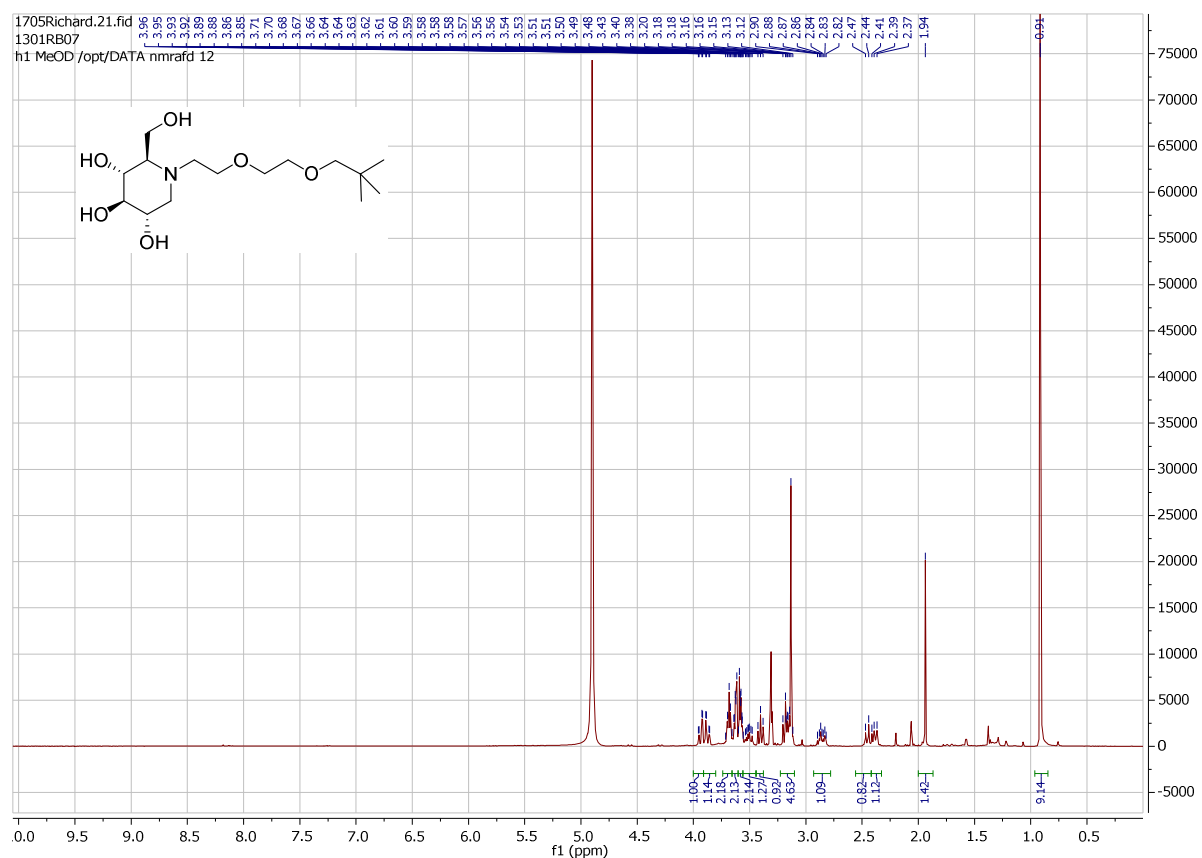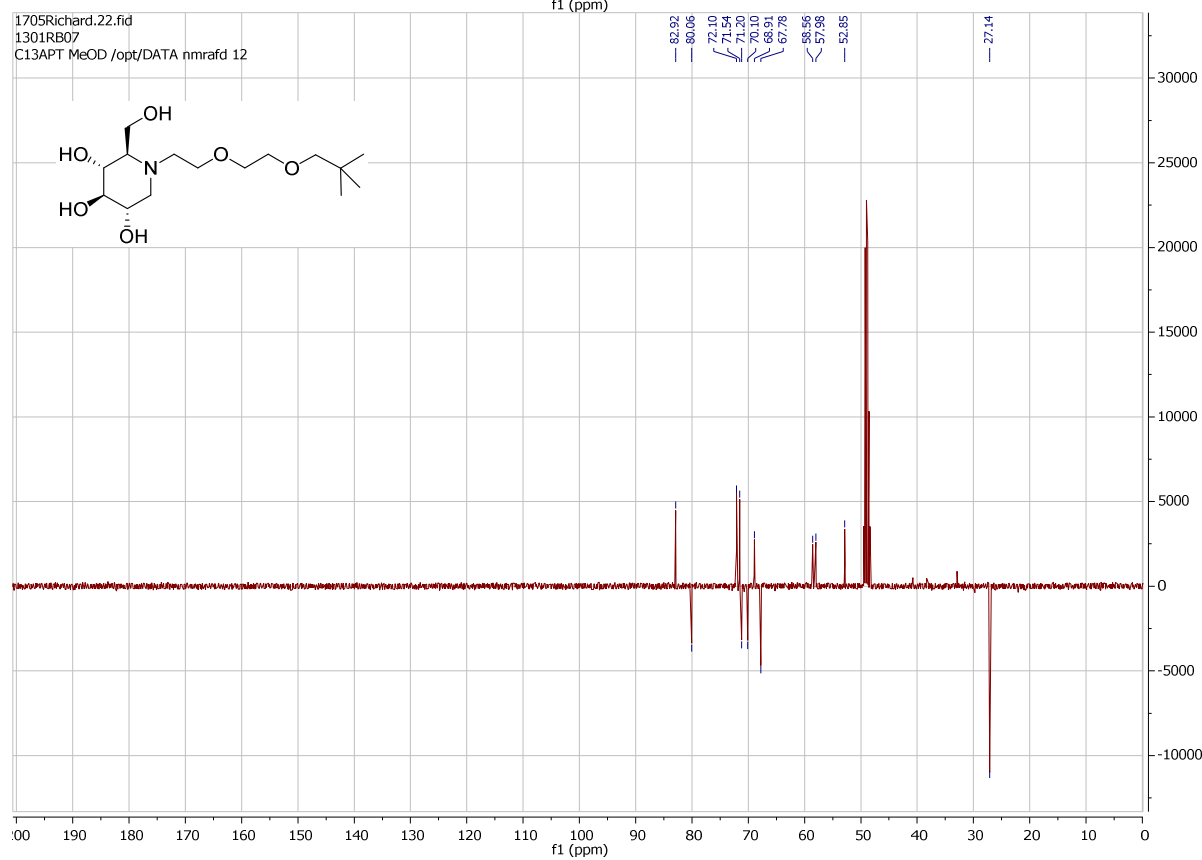

**<sup>1</sup>H-NMR and <sup>13</sup>C-NMR of compound C95.TFA in D<sub>2</sub>O.**

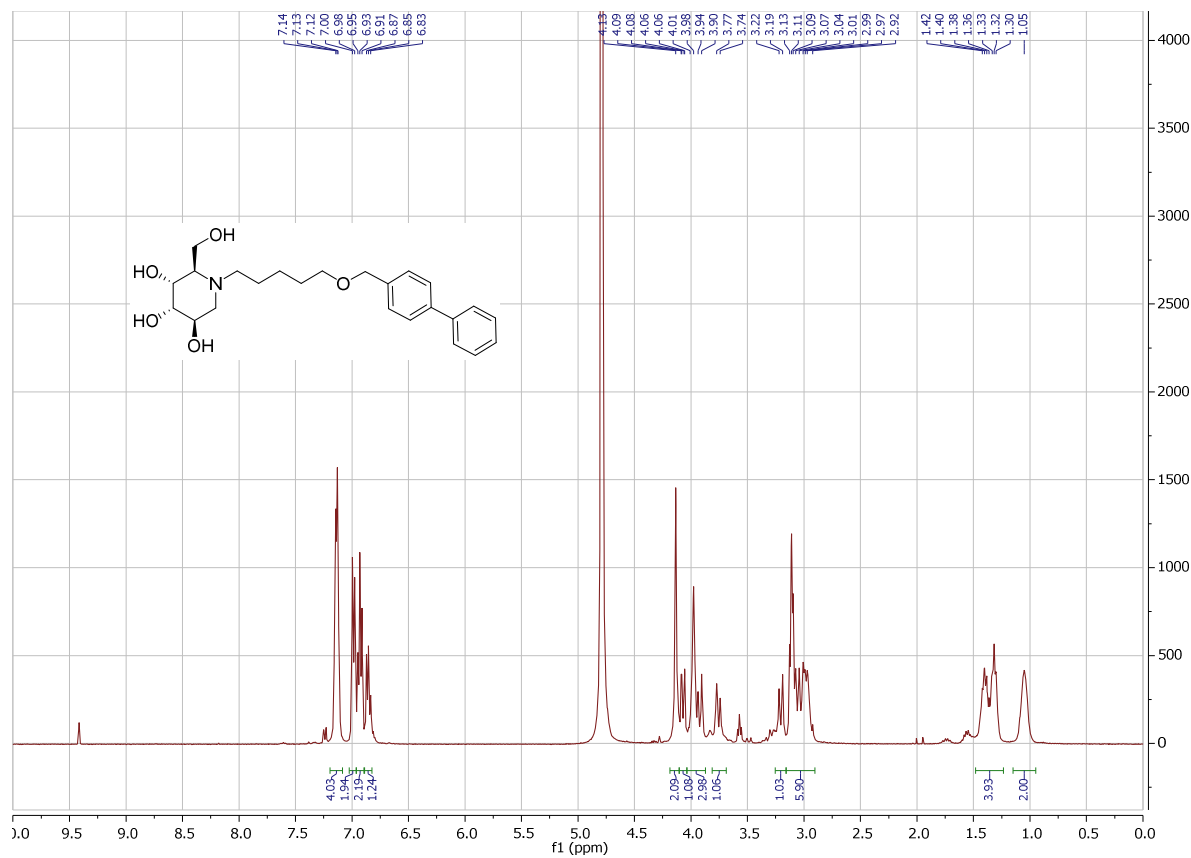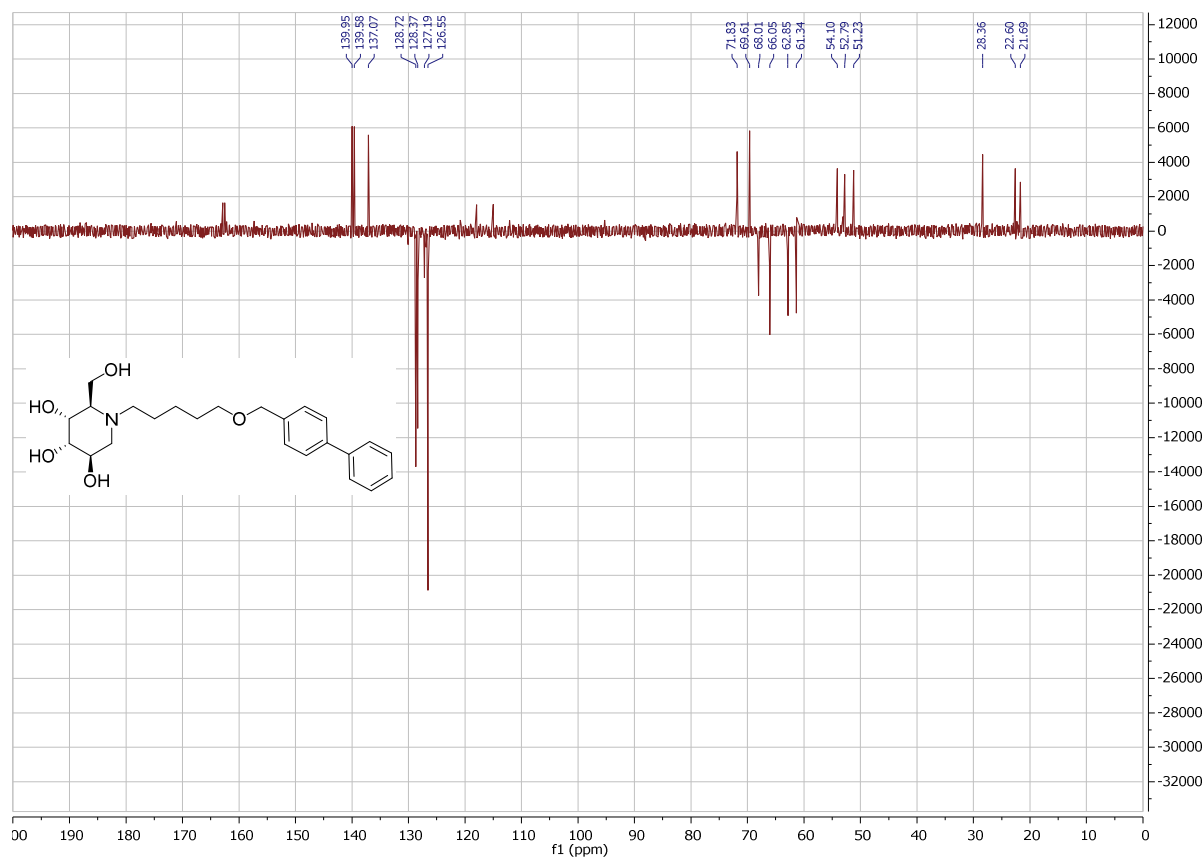

# $^1\text{H-NMR}$ and $^{13}\text{C-NMR}$ of compound C100.TFA in MeOD.

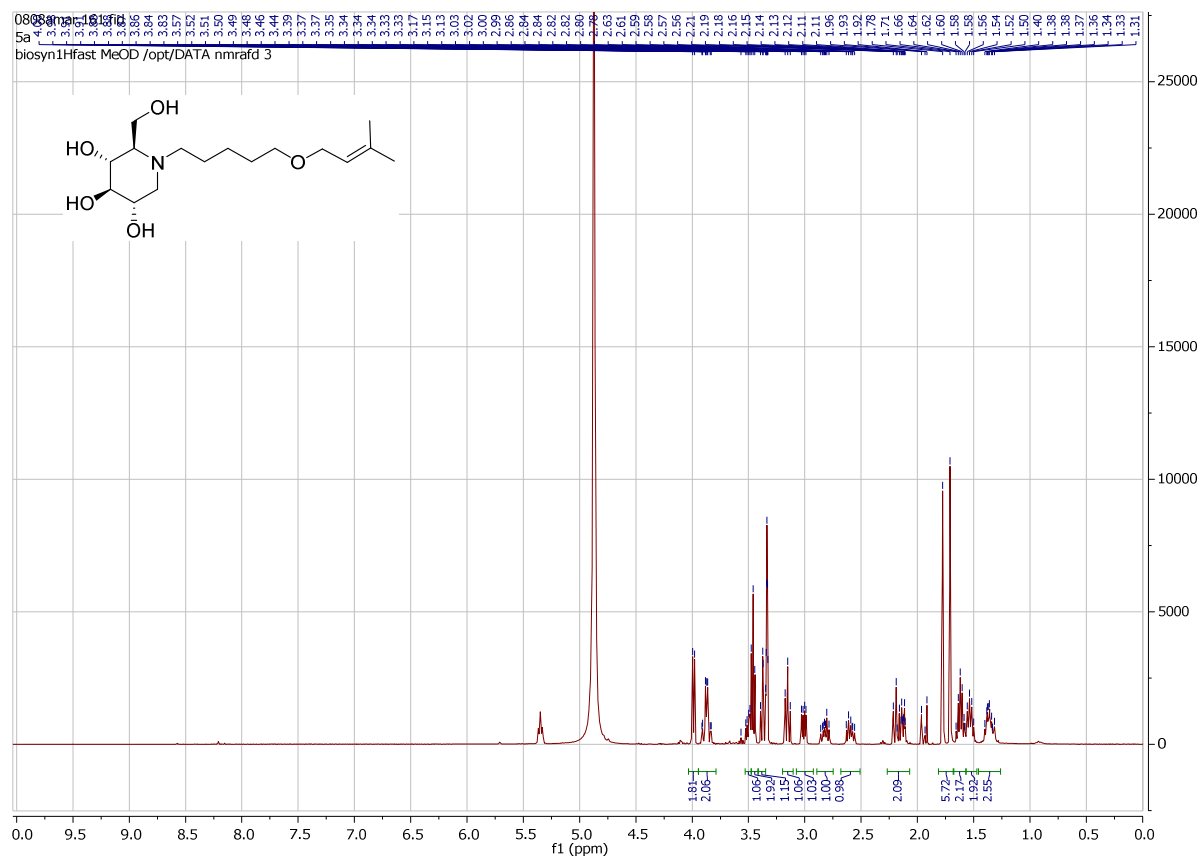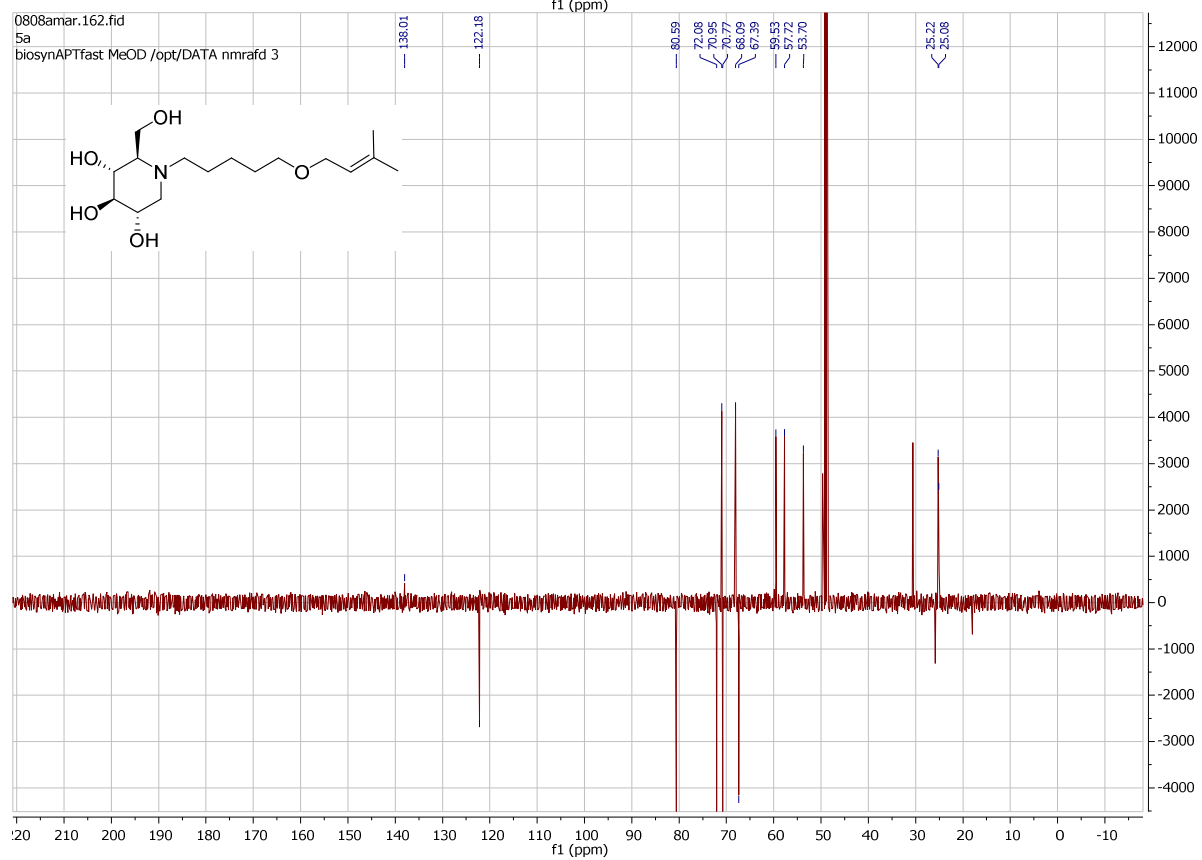



# <sup>1</sup>H-NMR and <sup>13</sup>C-NMR of compound C102.TFA in MeOD.

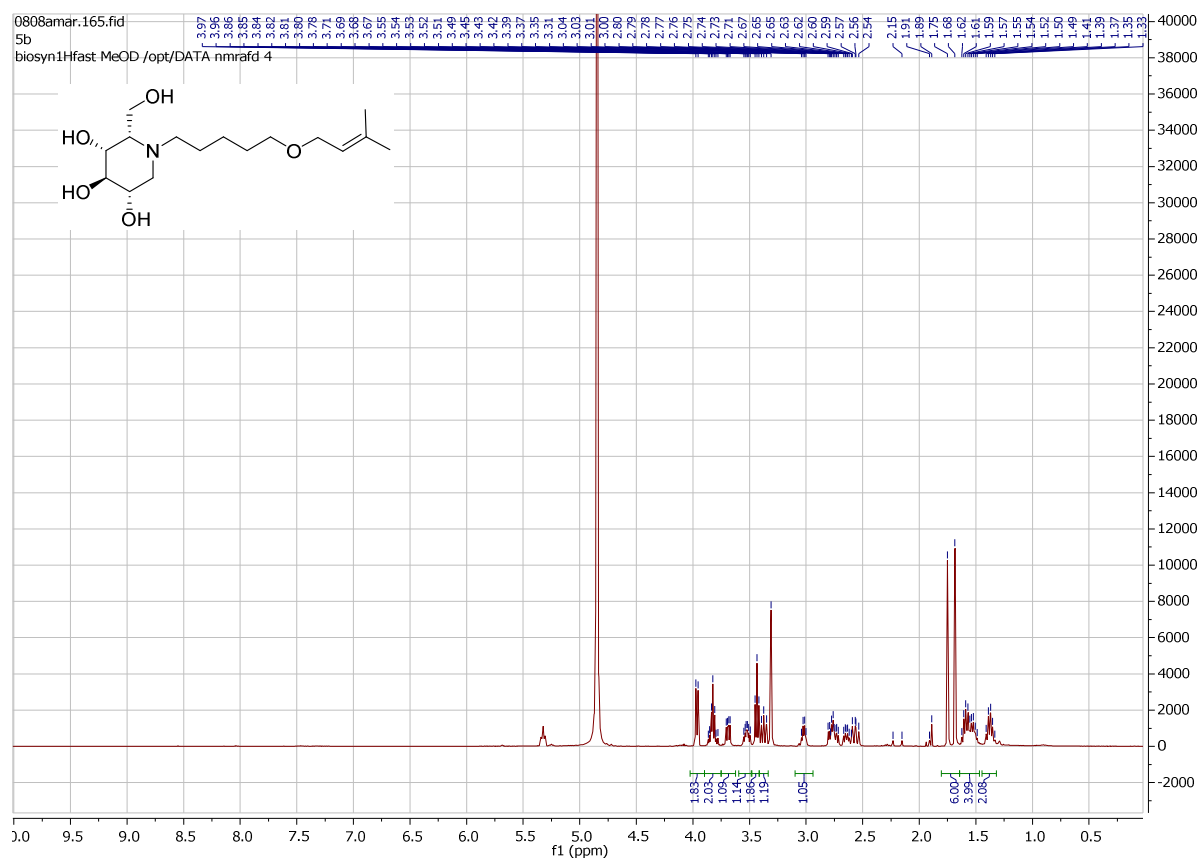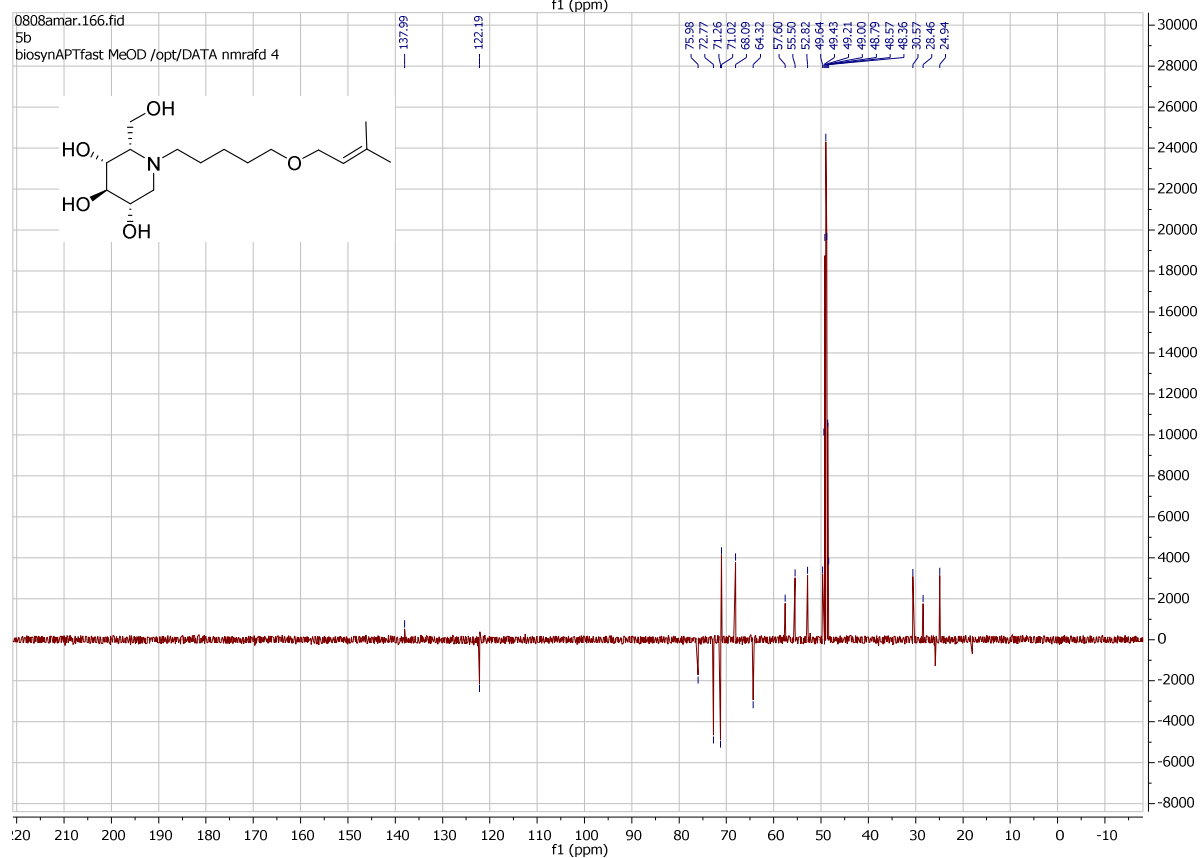

# $^1\text{H-NMR}$ and $^{13}\text{C-NMR}$ of compound C105.TFA in $\text{D}_2\text{O}$ .

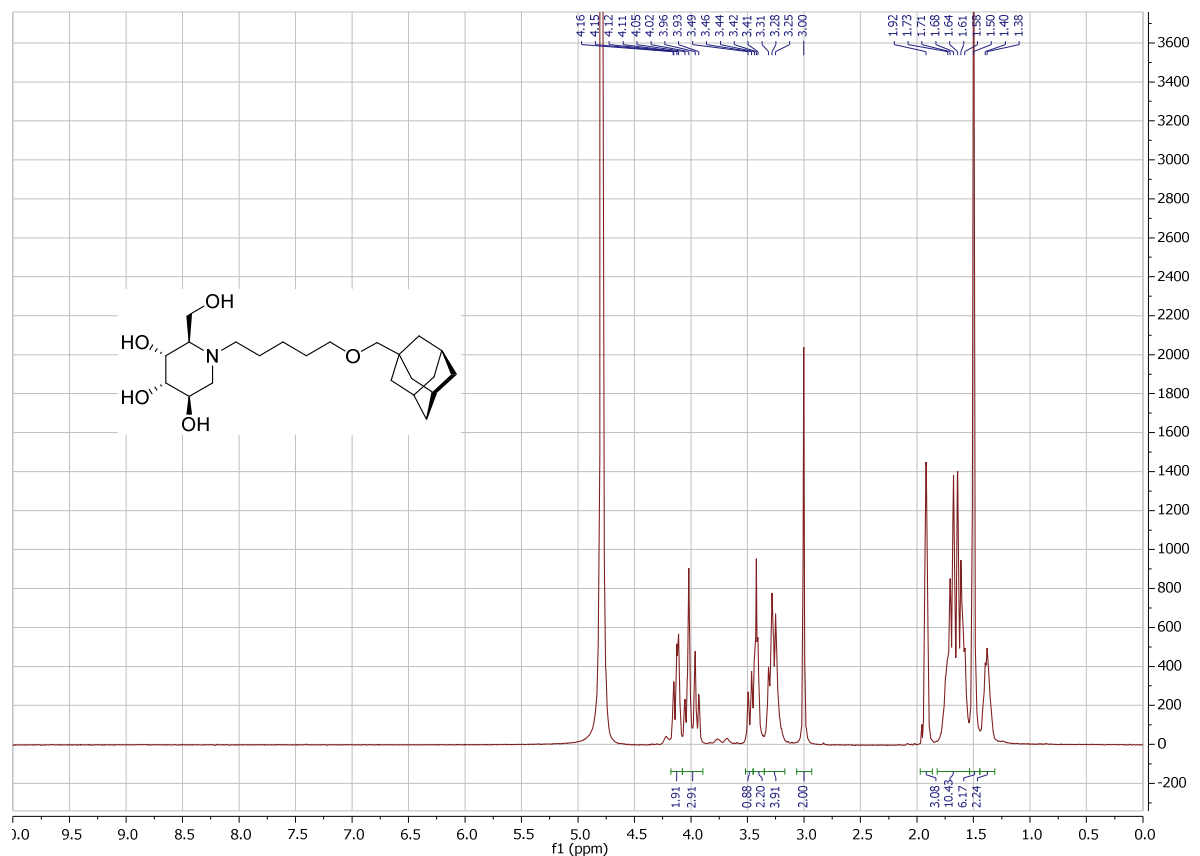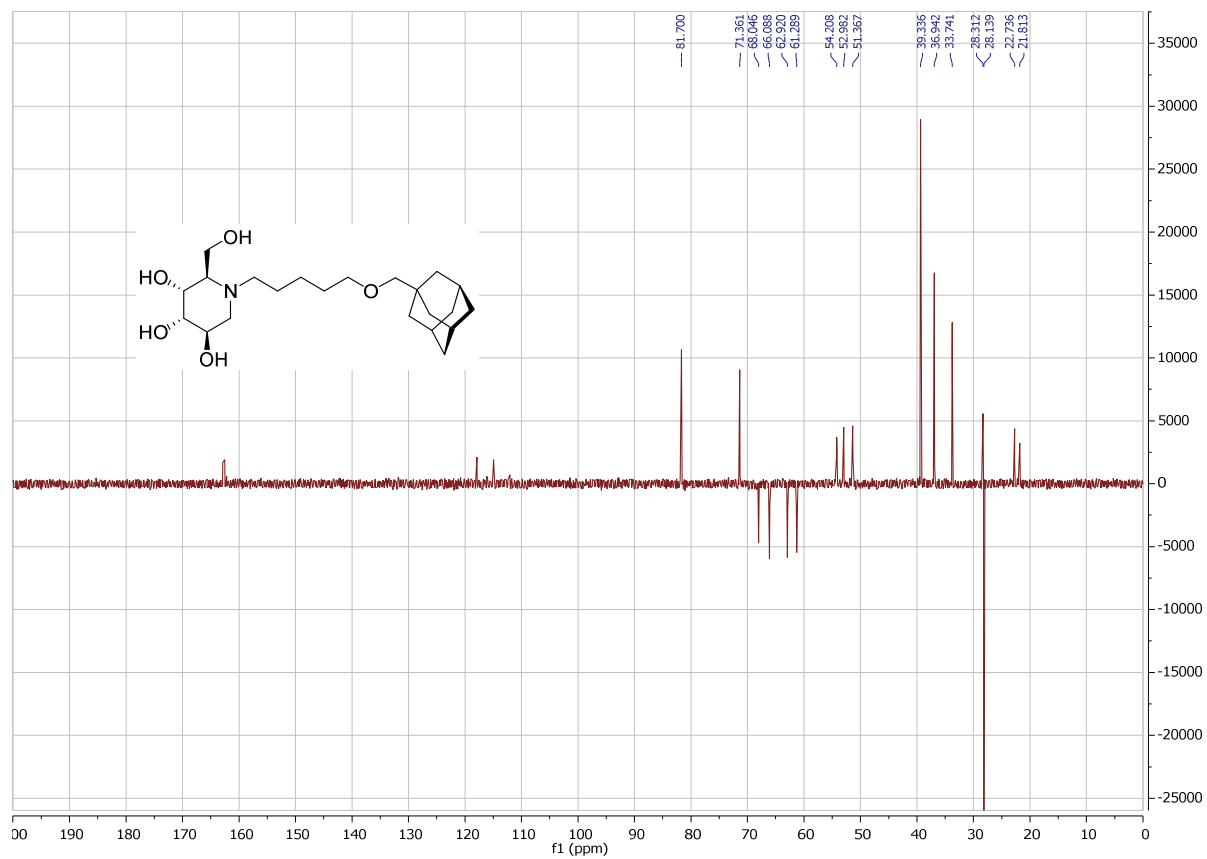

**<sup>1</sup>H-NMR and <sup>13</sup>C-NMR of compound C107.TFA in MeOD.**

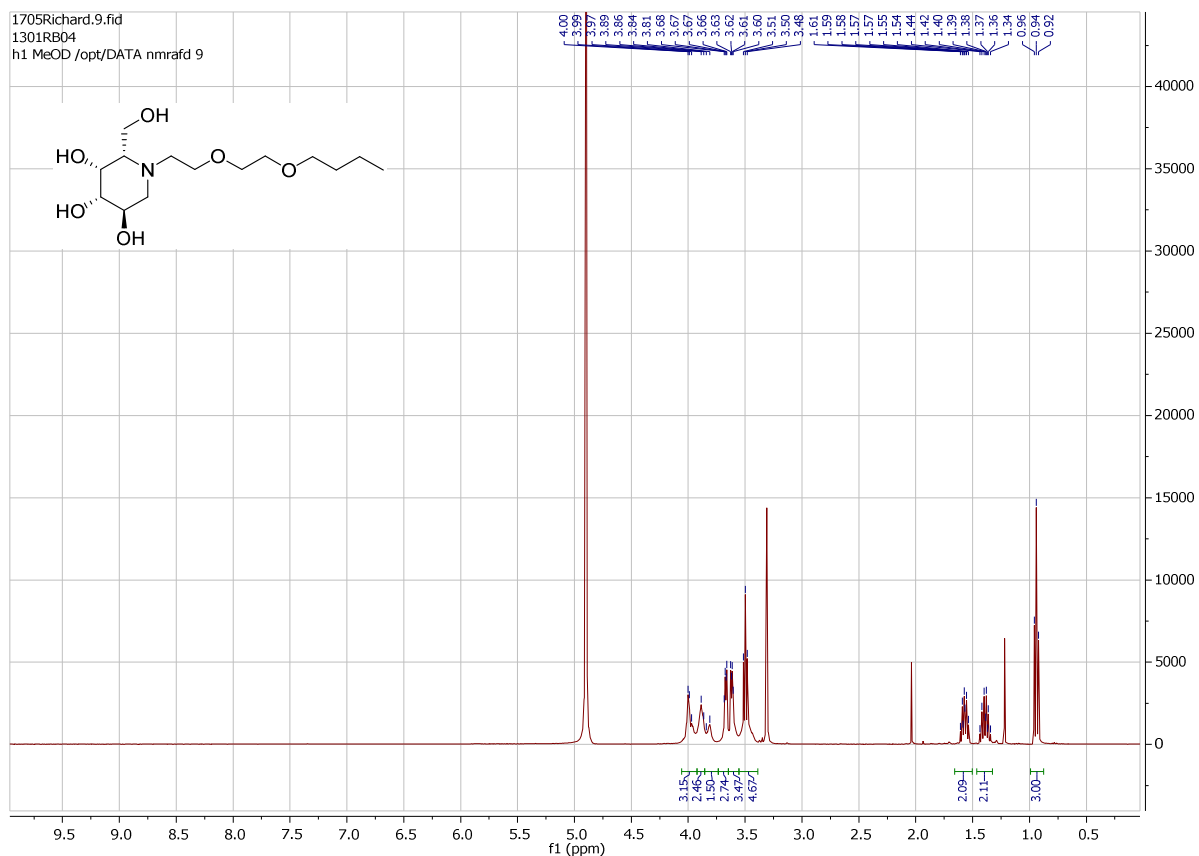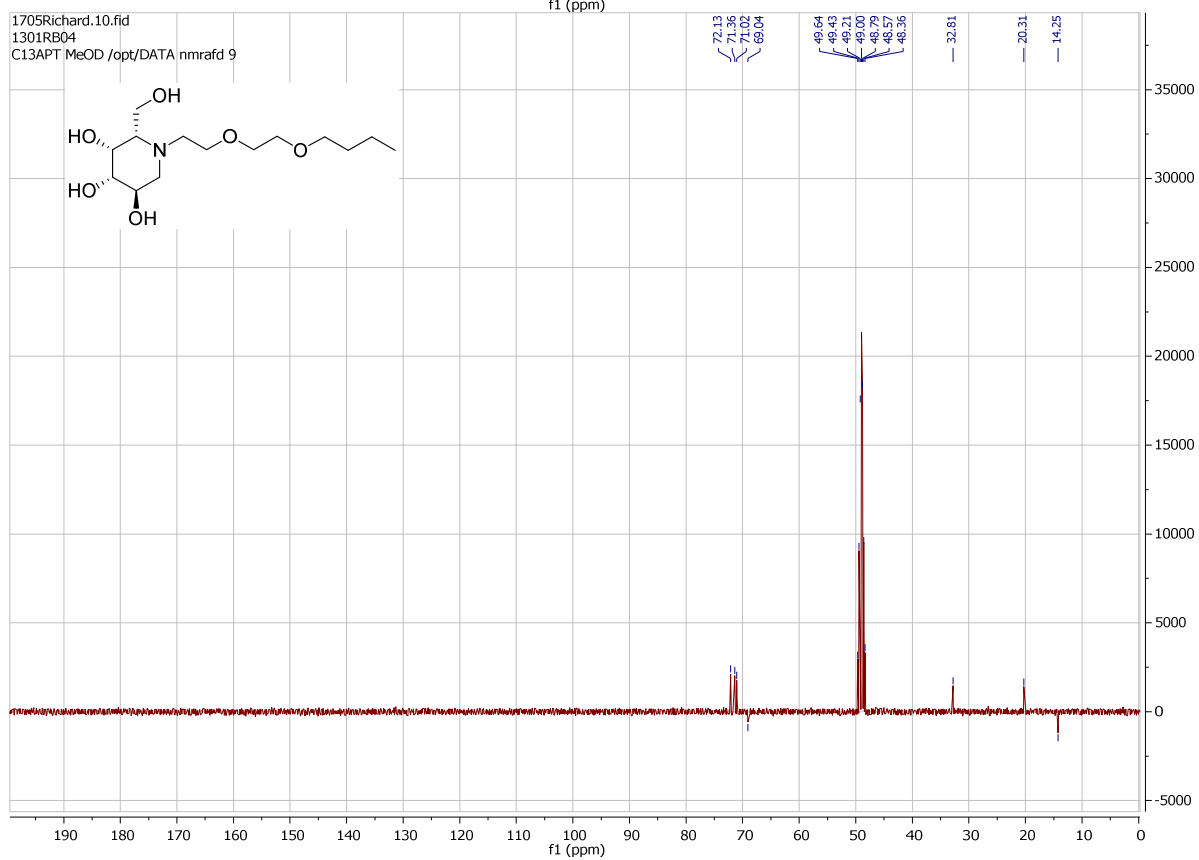

# $^1\text{H-NMR}$ and $^{13}\text{C-NMR}$ of compound C109.TFA in MeOD.

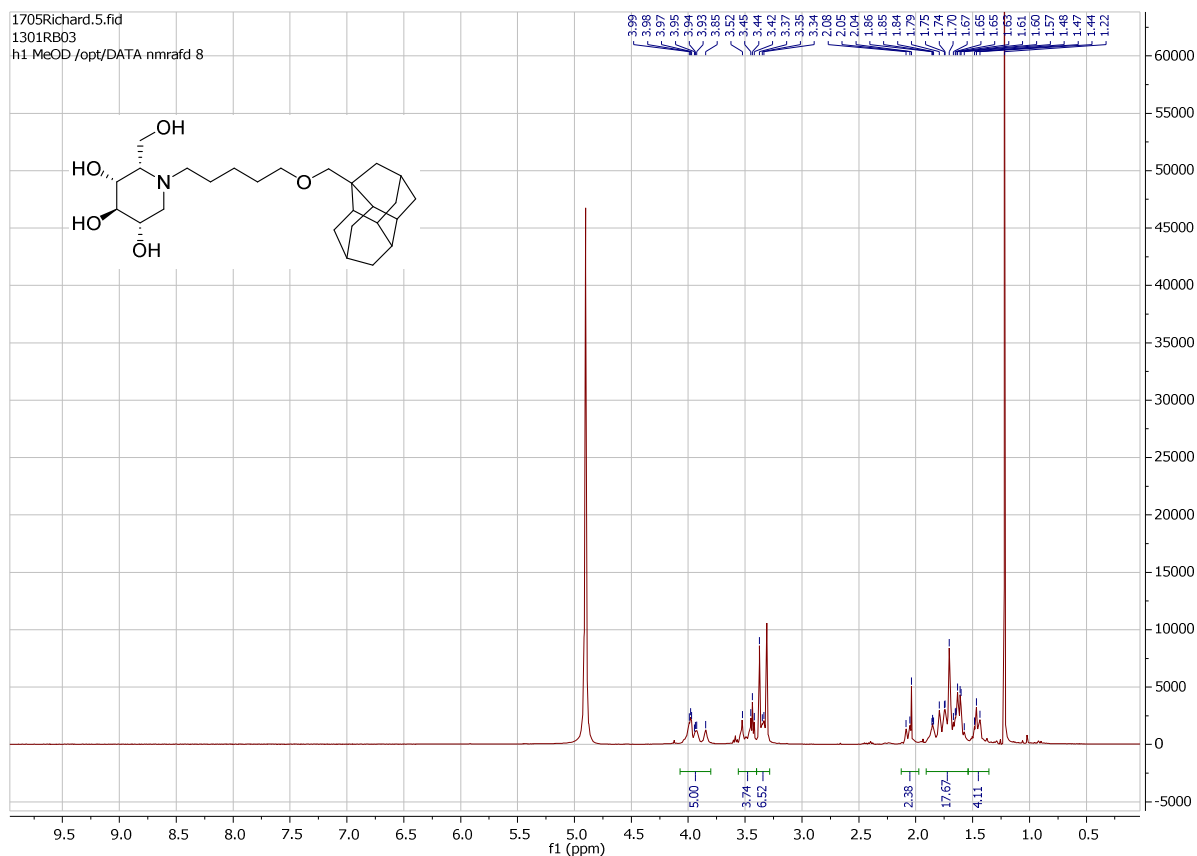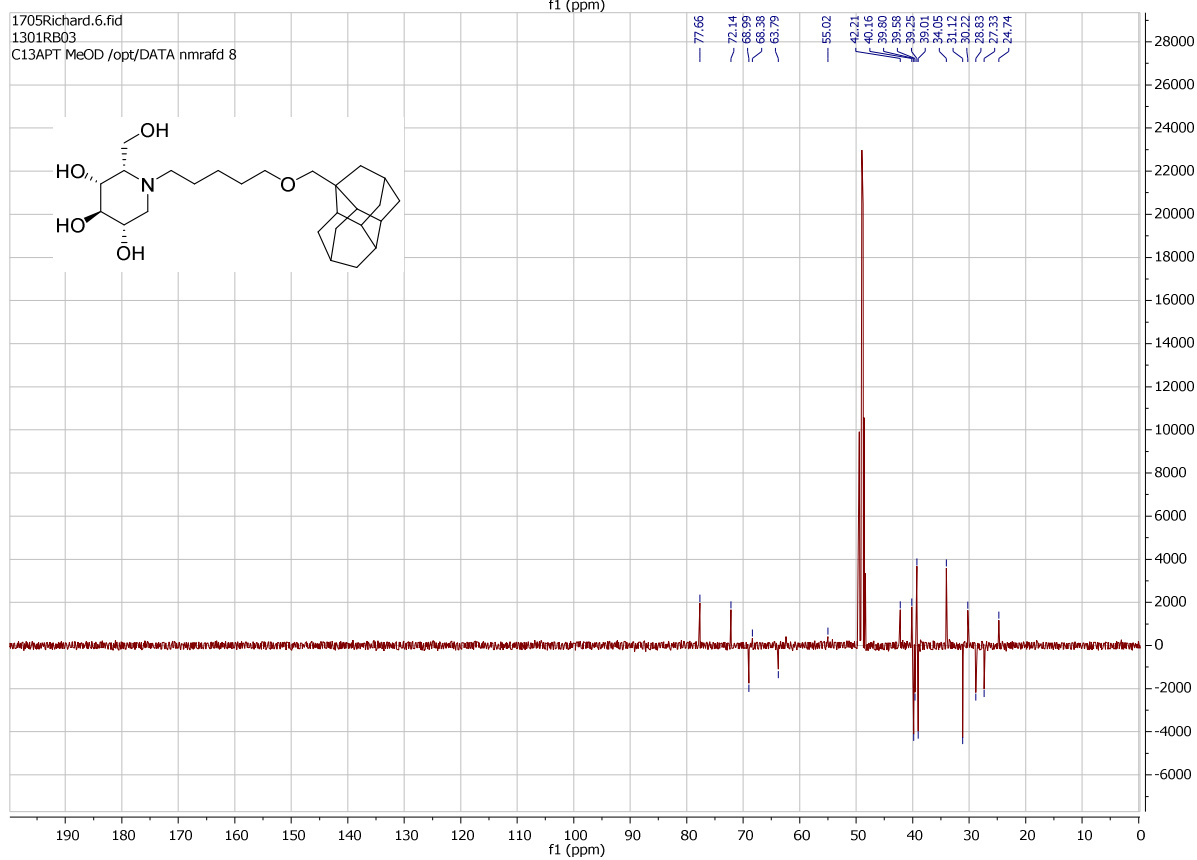

**<sup>1</sup>H-NMR and <sup>13</sup>C-NMR of compound C111.TFA in MeOD.**

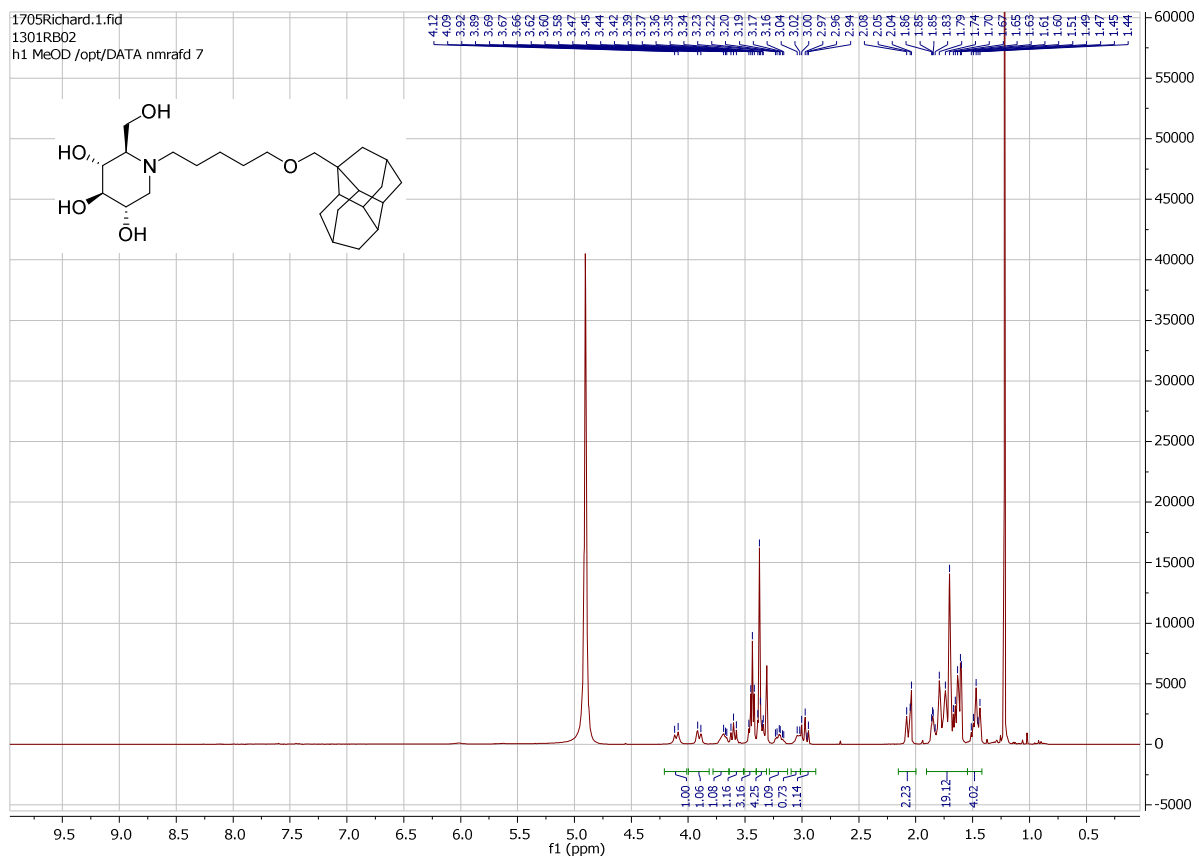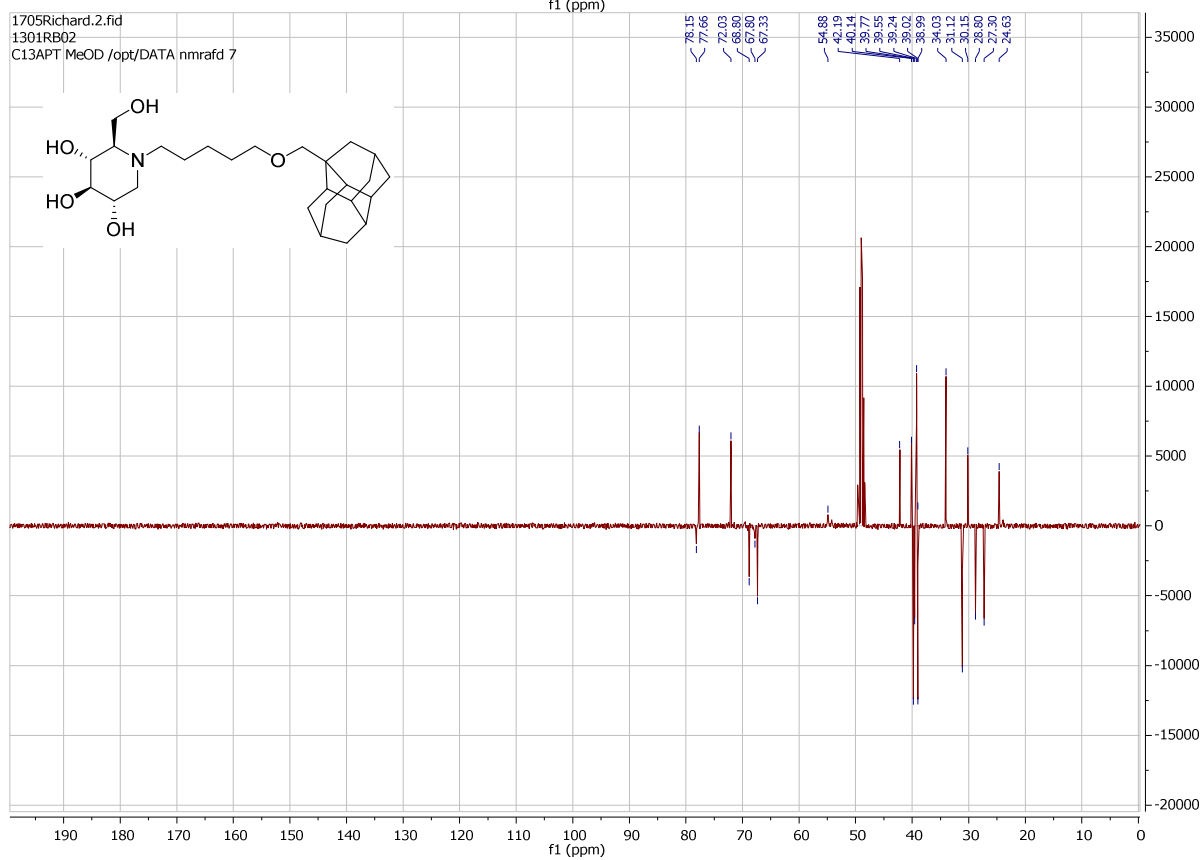

# $^1\text{H-NMR}$ and $^{13}\text{C-NMR}$ of compound C124.TFA in MeOD.

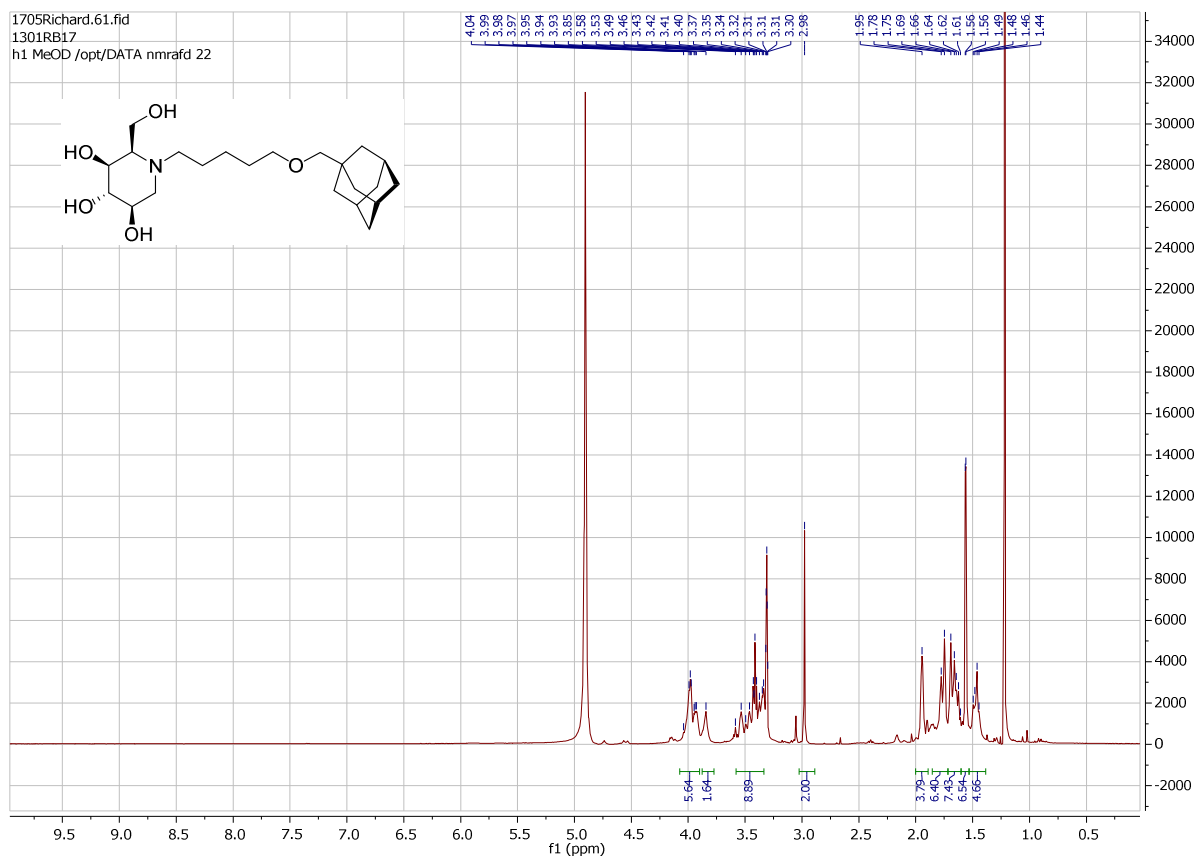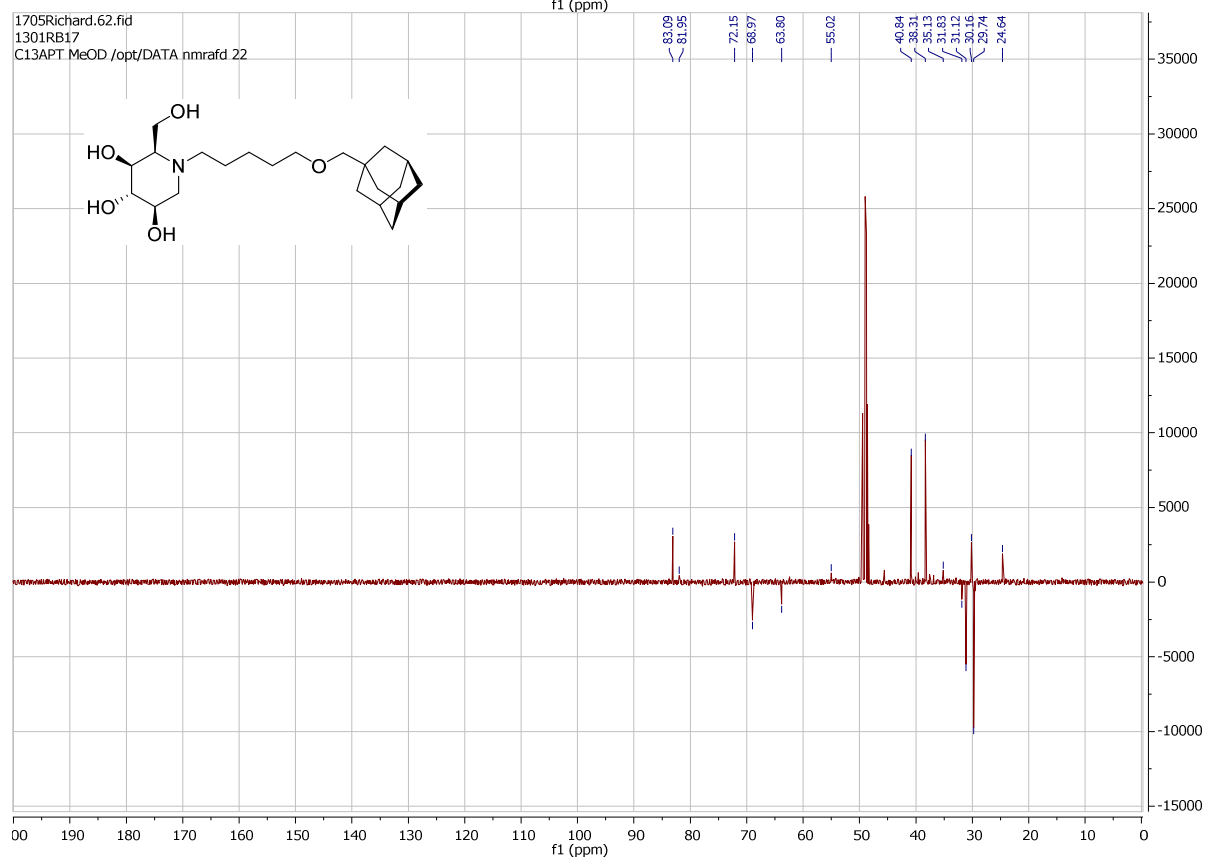

# <sup>1</sup>H-NMR and <sup>13</sup>C-NMR of compound C170.TFA in MeOD.

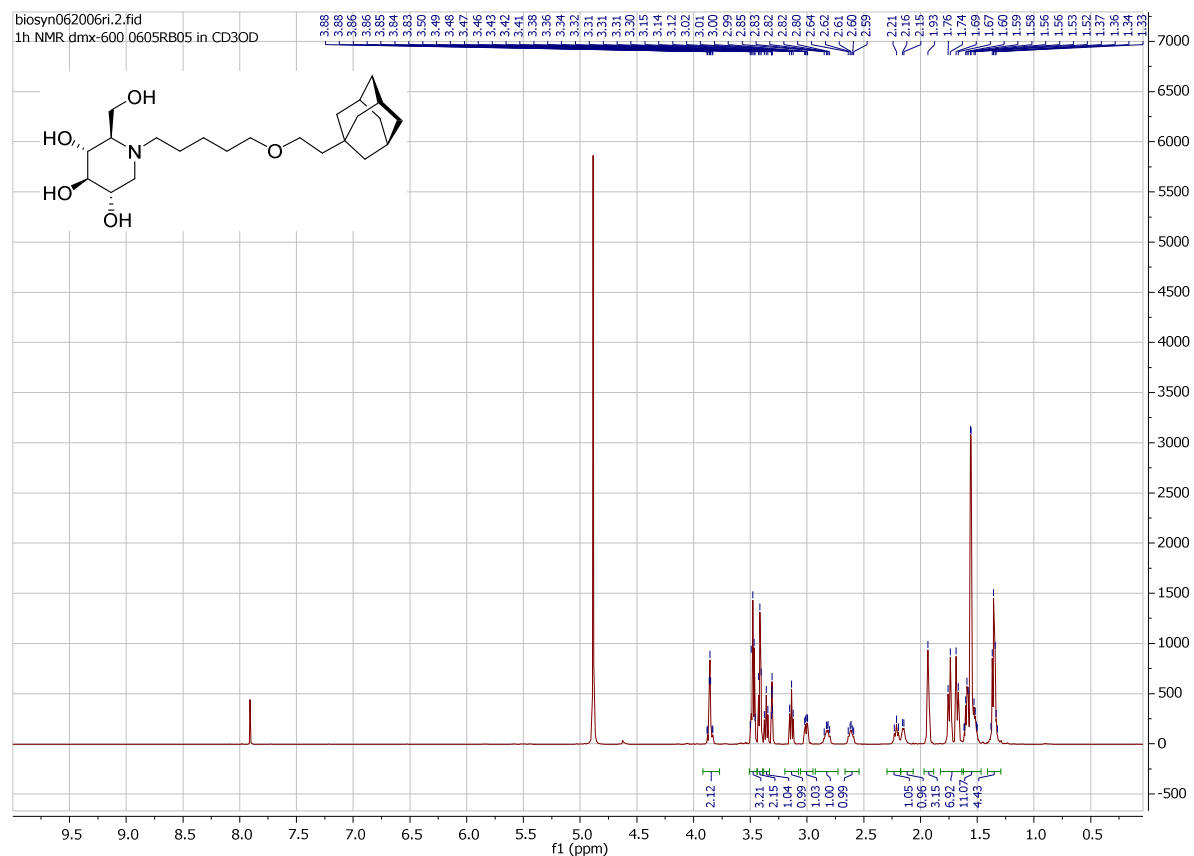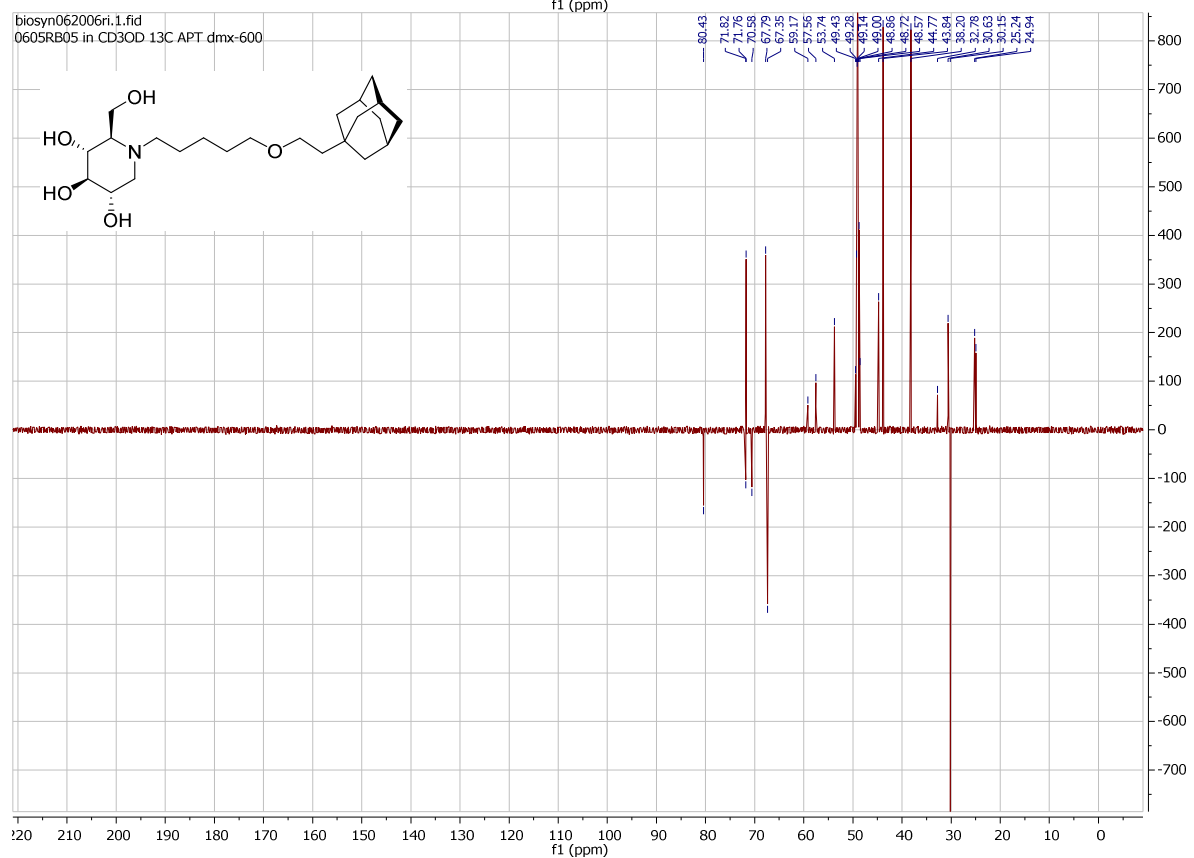









# $^1\text{H-NMR}$ and $^{13}\text{C-NMR}$ of compound C194.TFA in $\text{D}_2\text{O}$ .

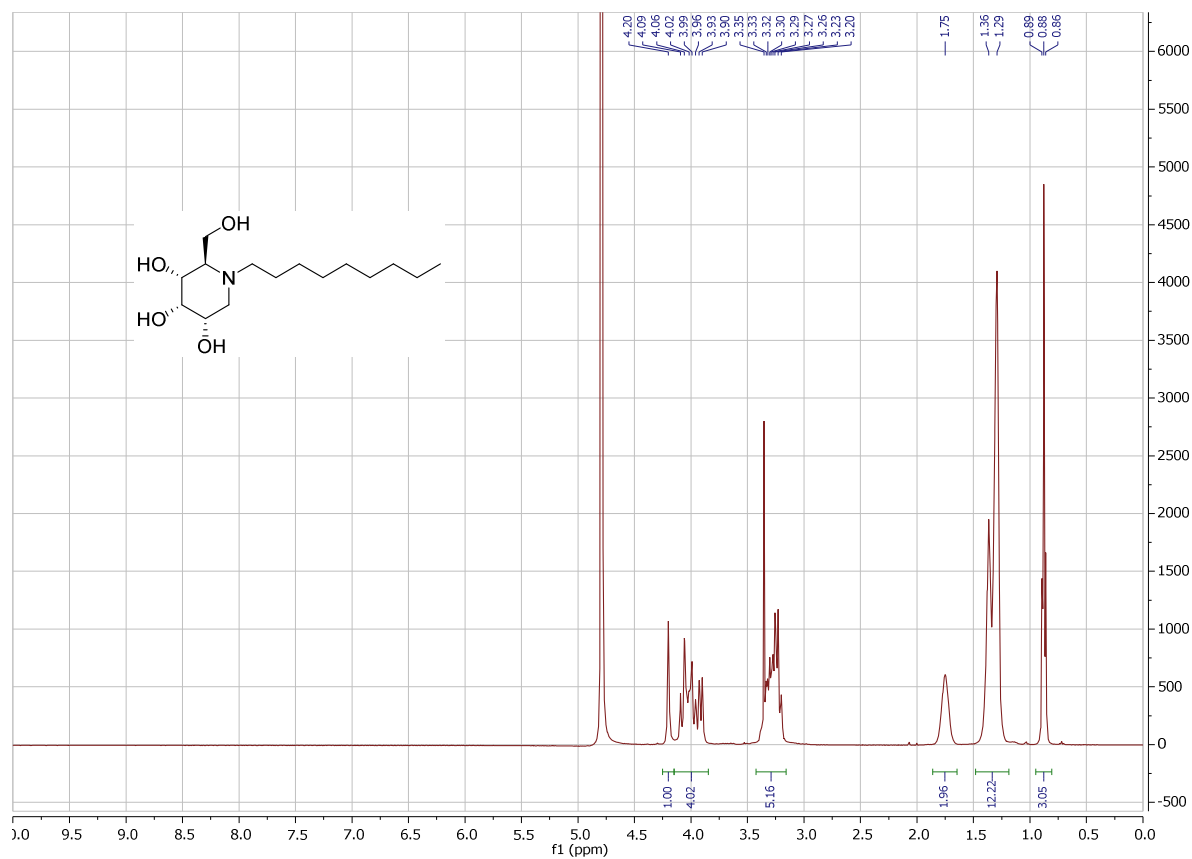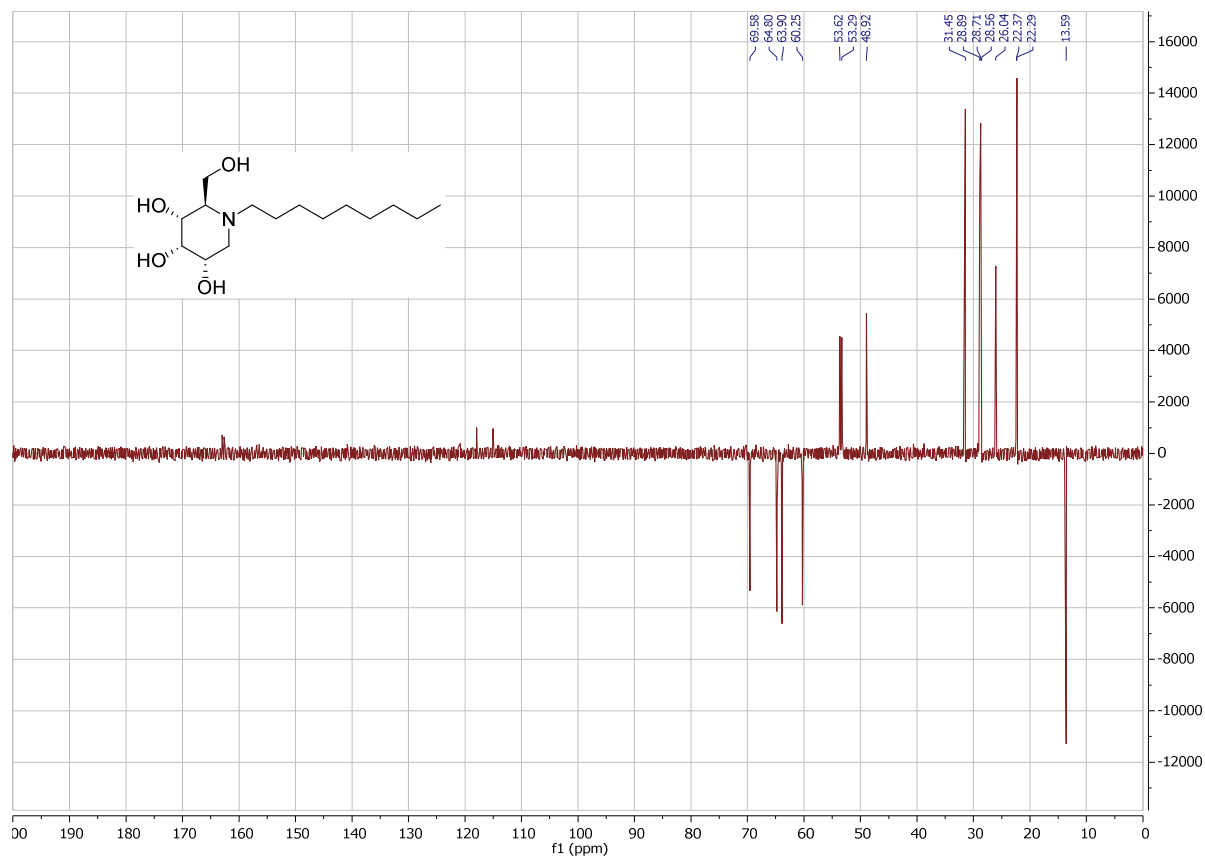

**<sup>1</sup>H-NMR and <sup>13</sup>C-NMR of compound C200.TFA in MeOD.**

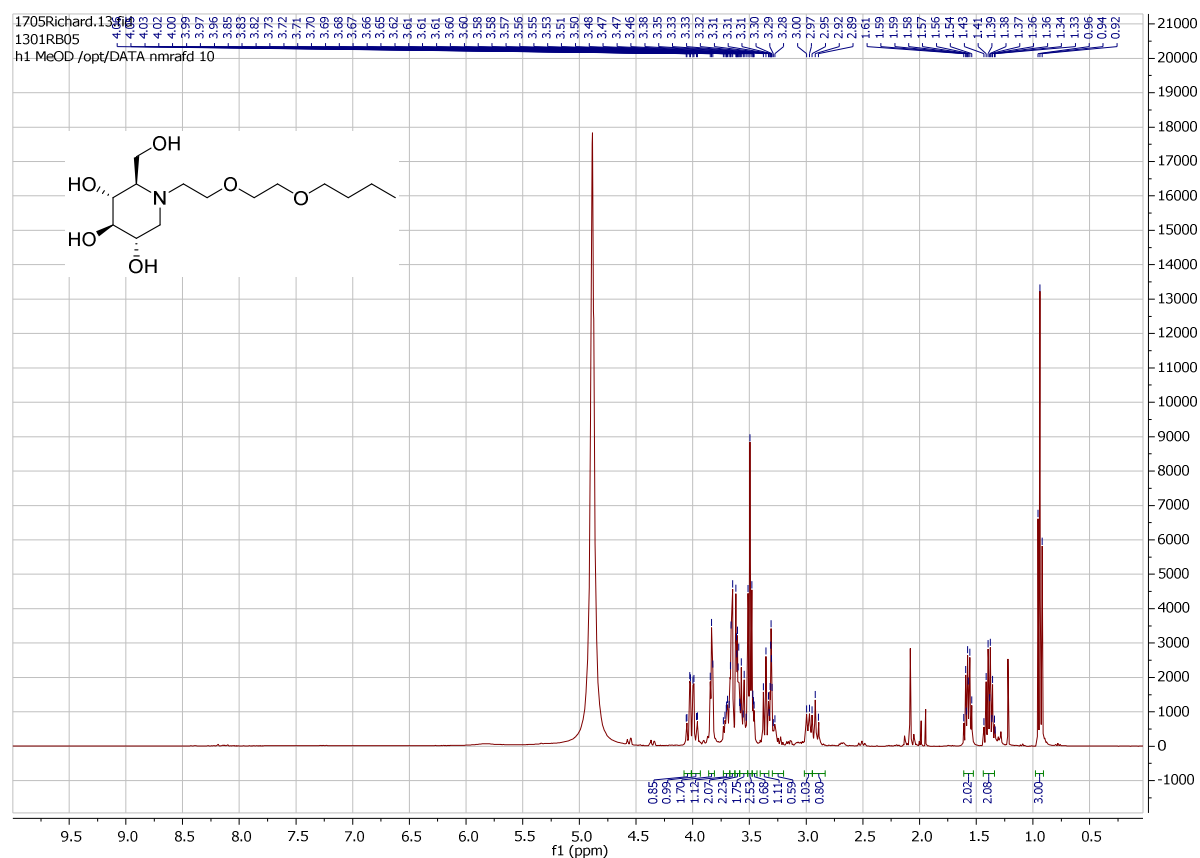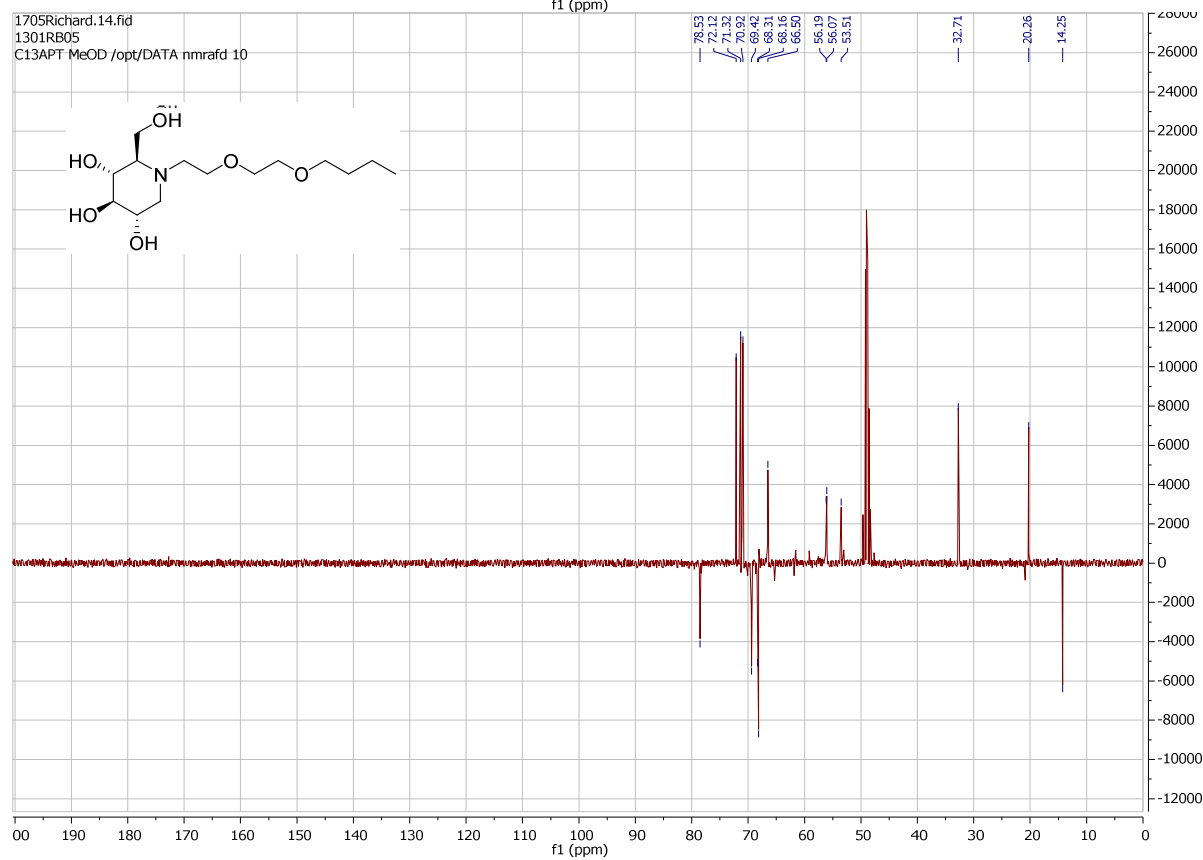

# <sup>1</sup>H-NMR and <sup>13</sup>C-NMR of compound C203.TFA in D<sub>2</sub>O.

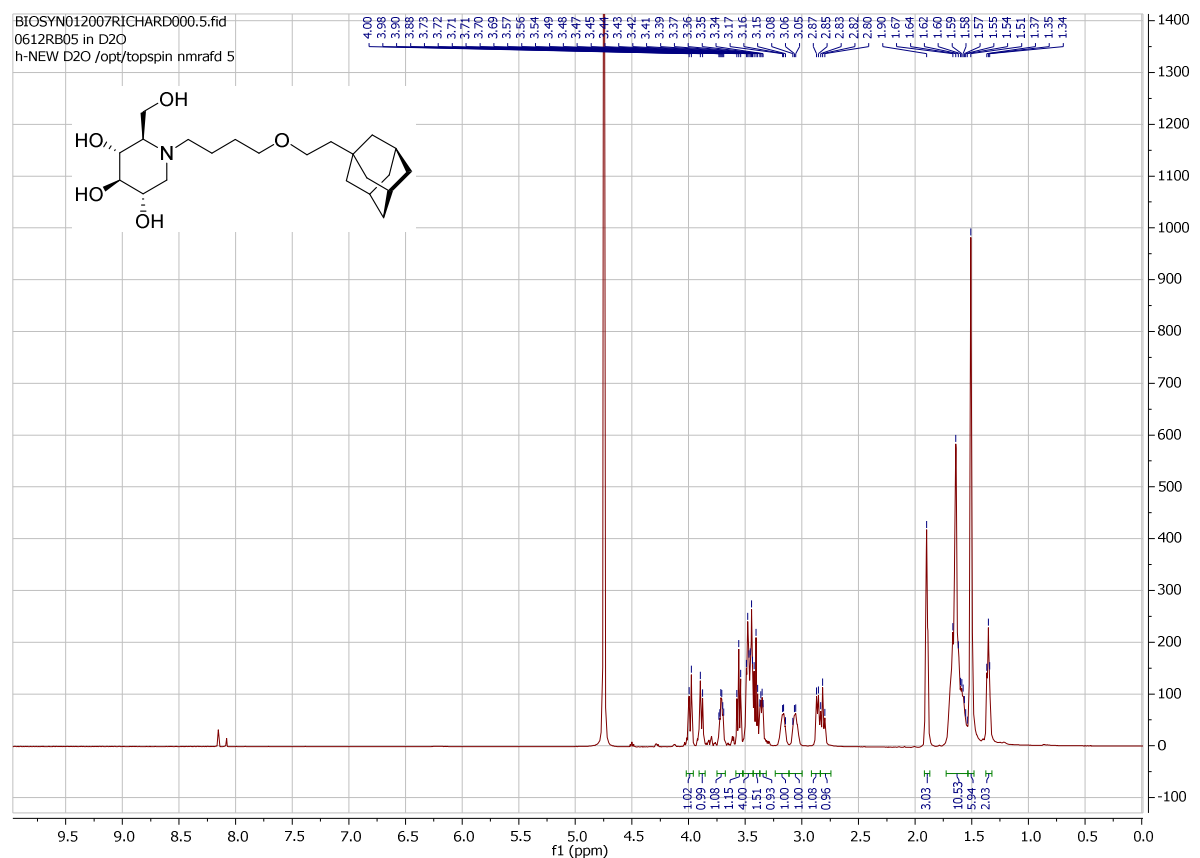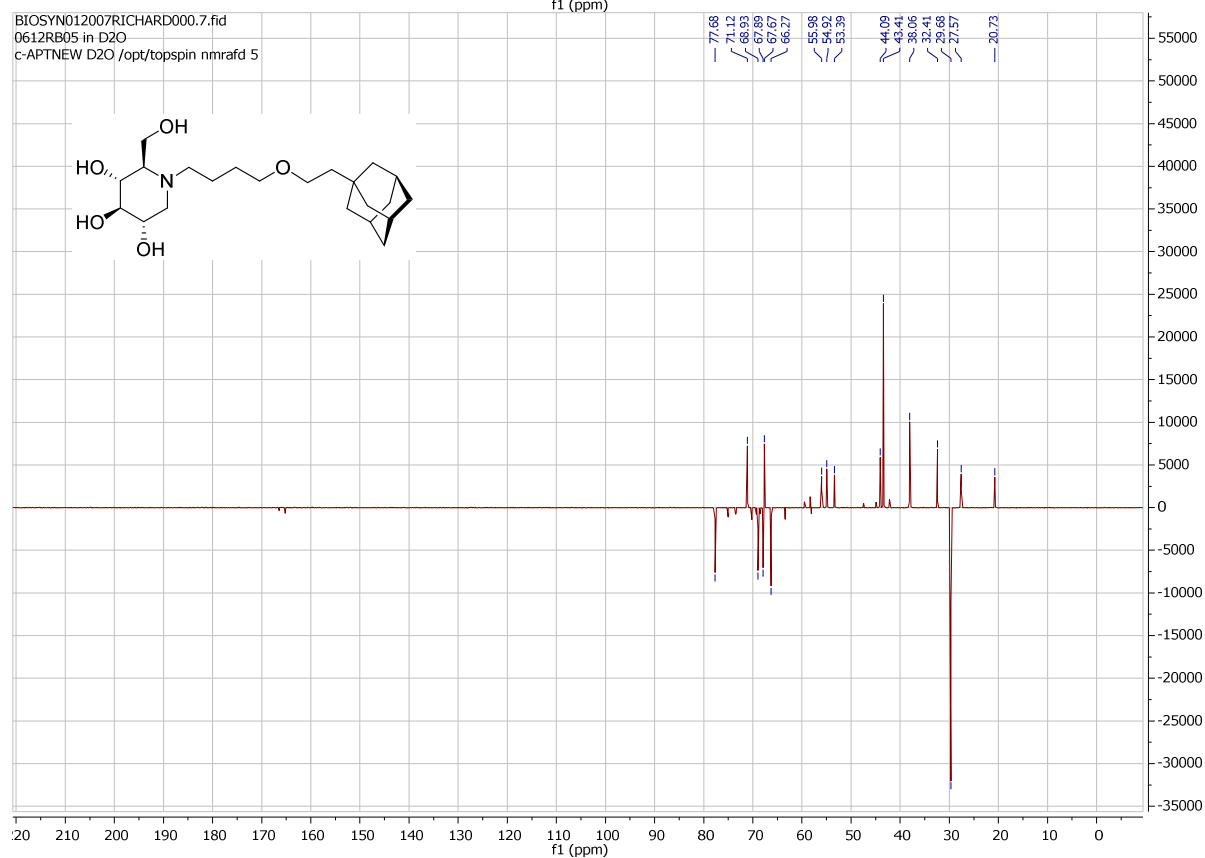

# $^1\text{H-NMR}$ and $^{13}\text{C-NMR}$ of compound C204.TFA in MeOD.

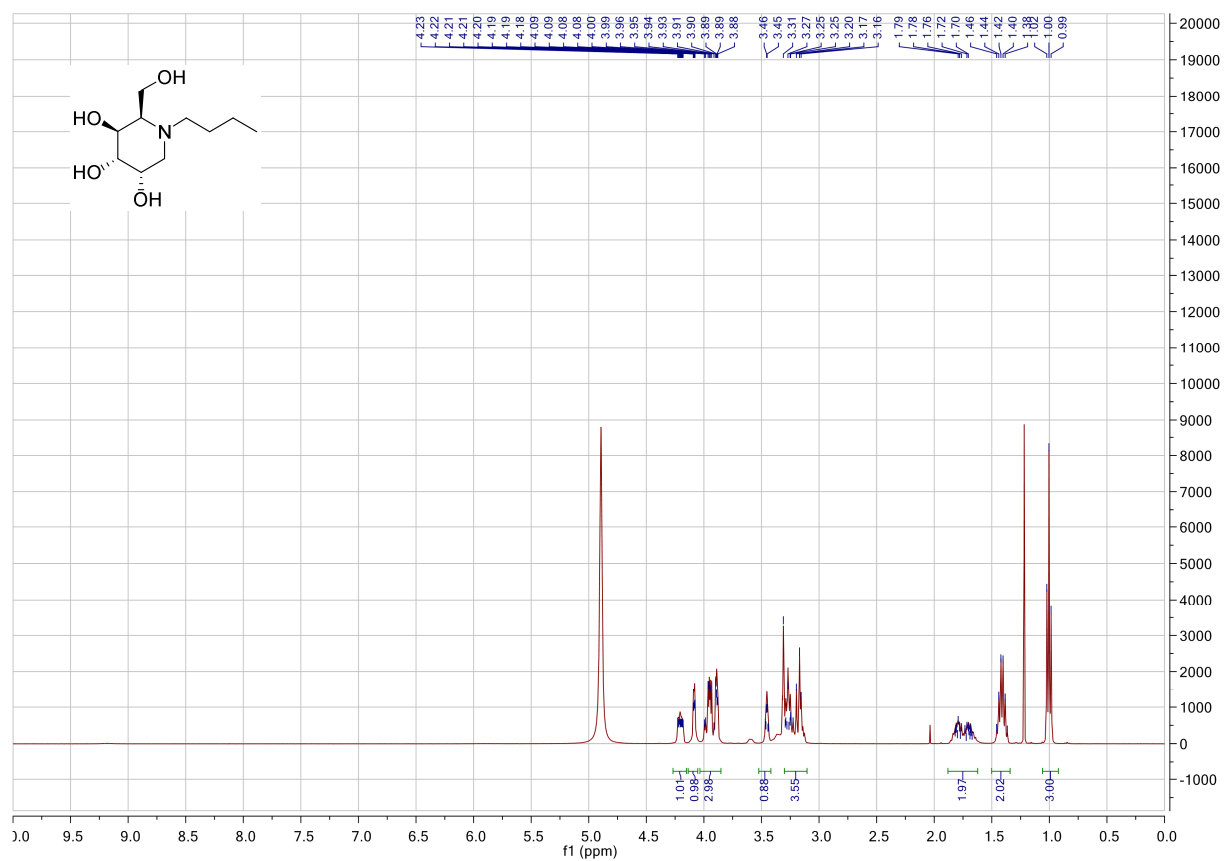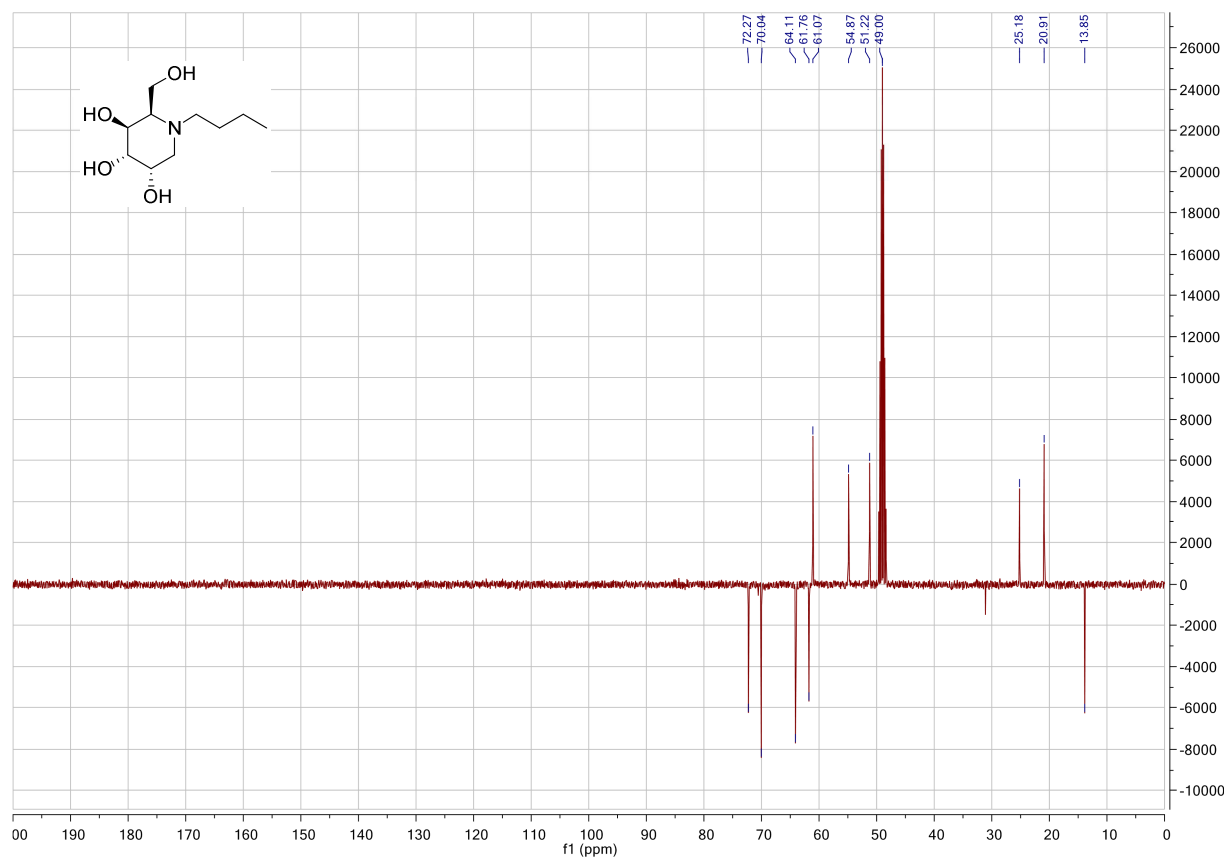

**<sup>1</sup>H-NMR and <sup>13</sup>C-NMR of compound C206.TFA in MeOD.**

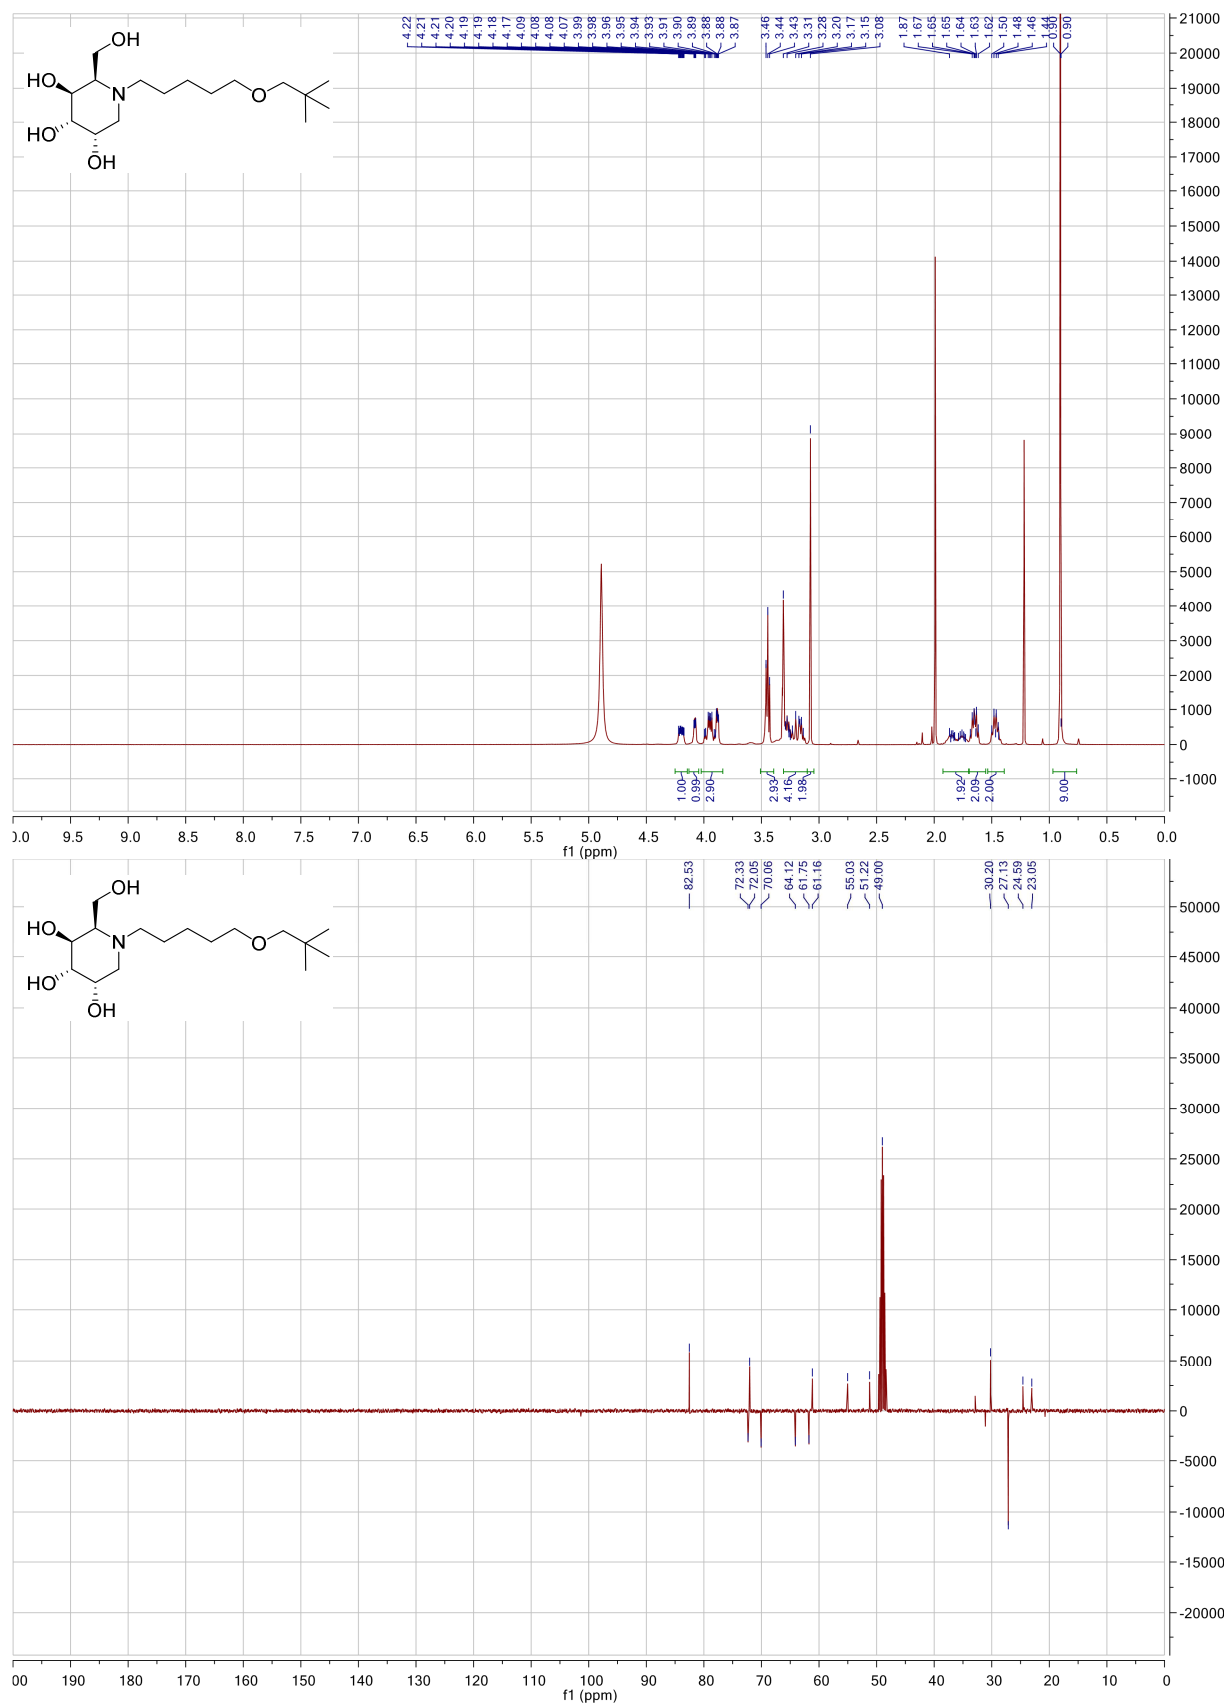

# <sup>1</sup>H-NMR and <sup>13</sup>C-NMR of compound C208.TFA in MeOD.

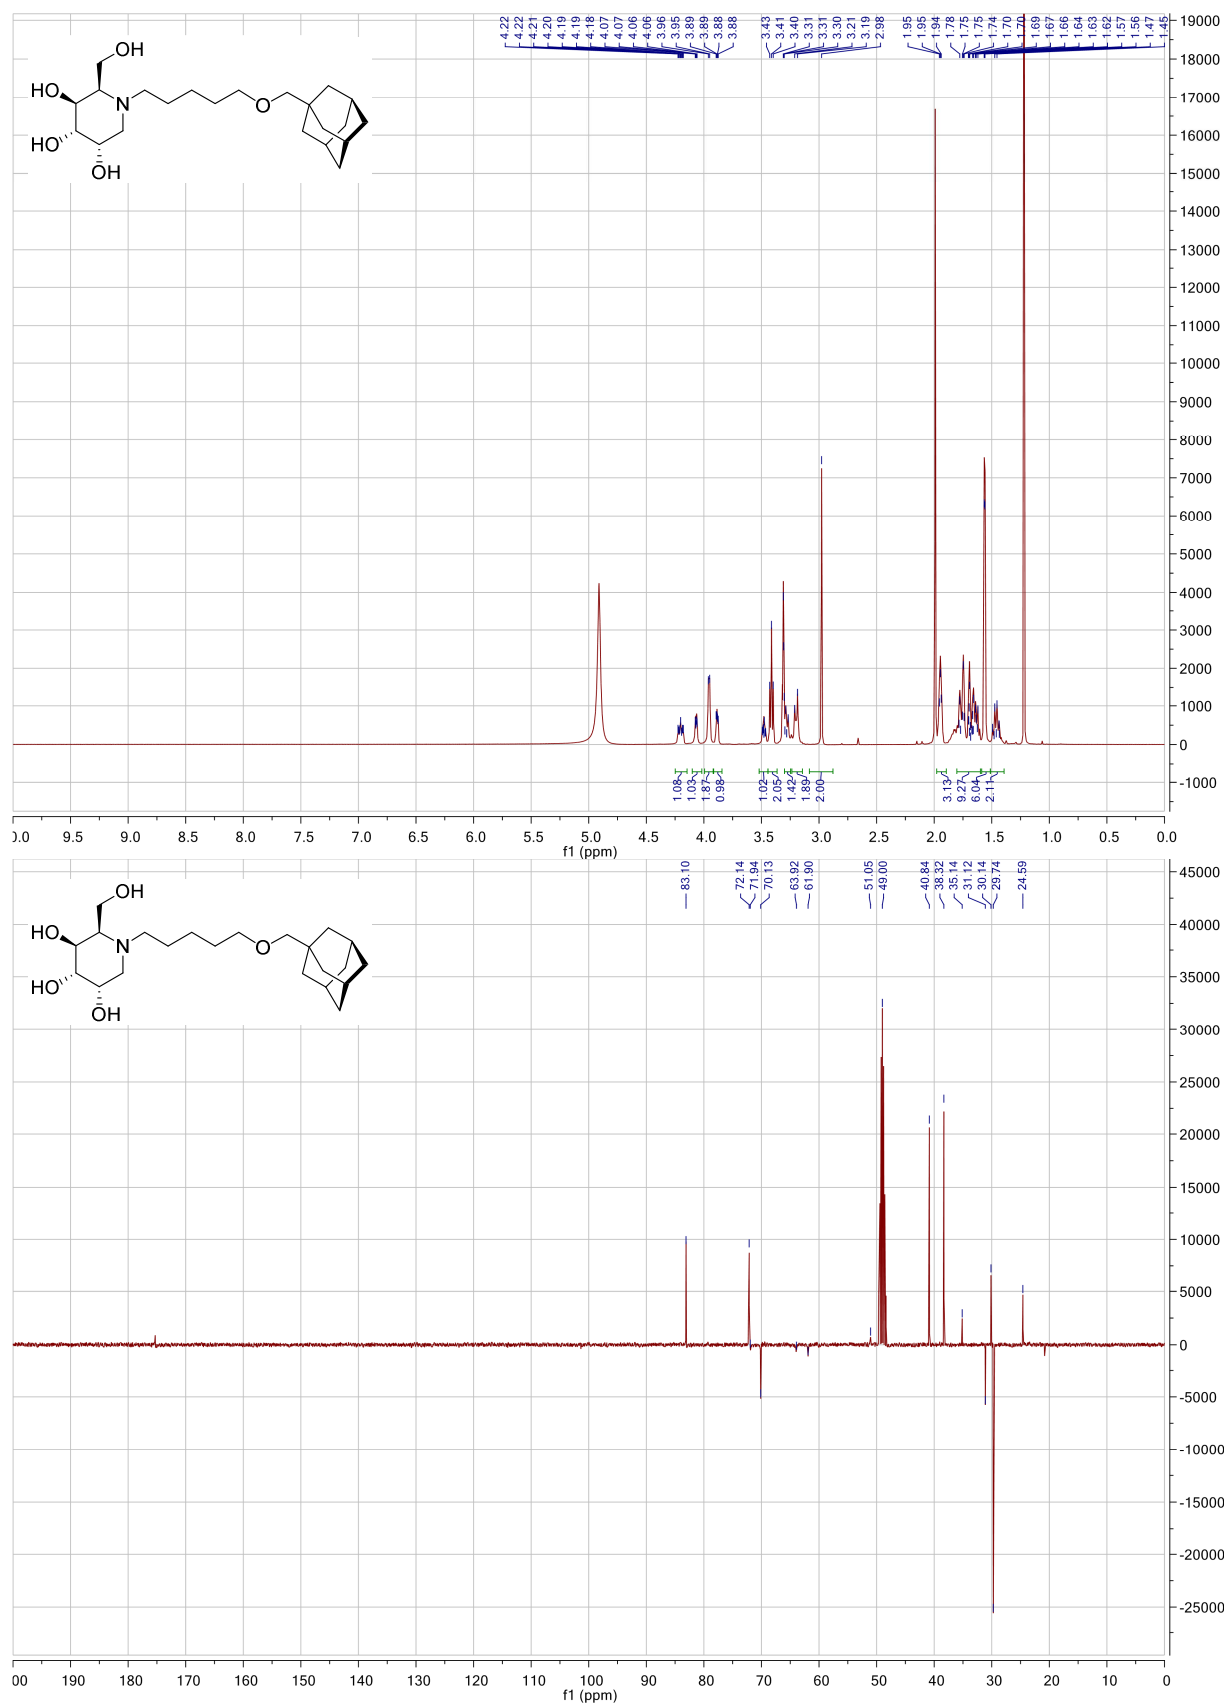



# <sup>1</sup>H-NMR and <sup>13</sup>C-NMR of compound C210.TFA in MeOD.

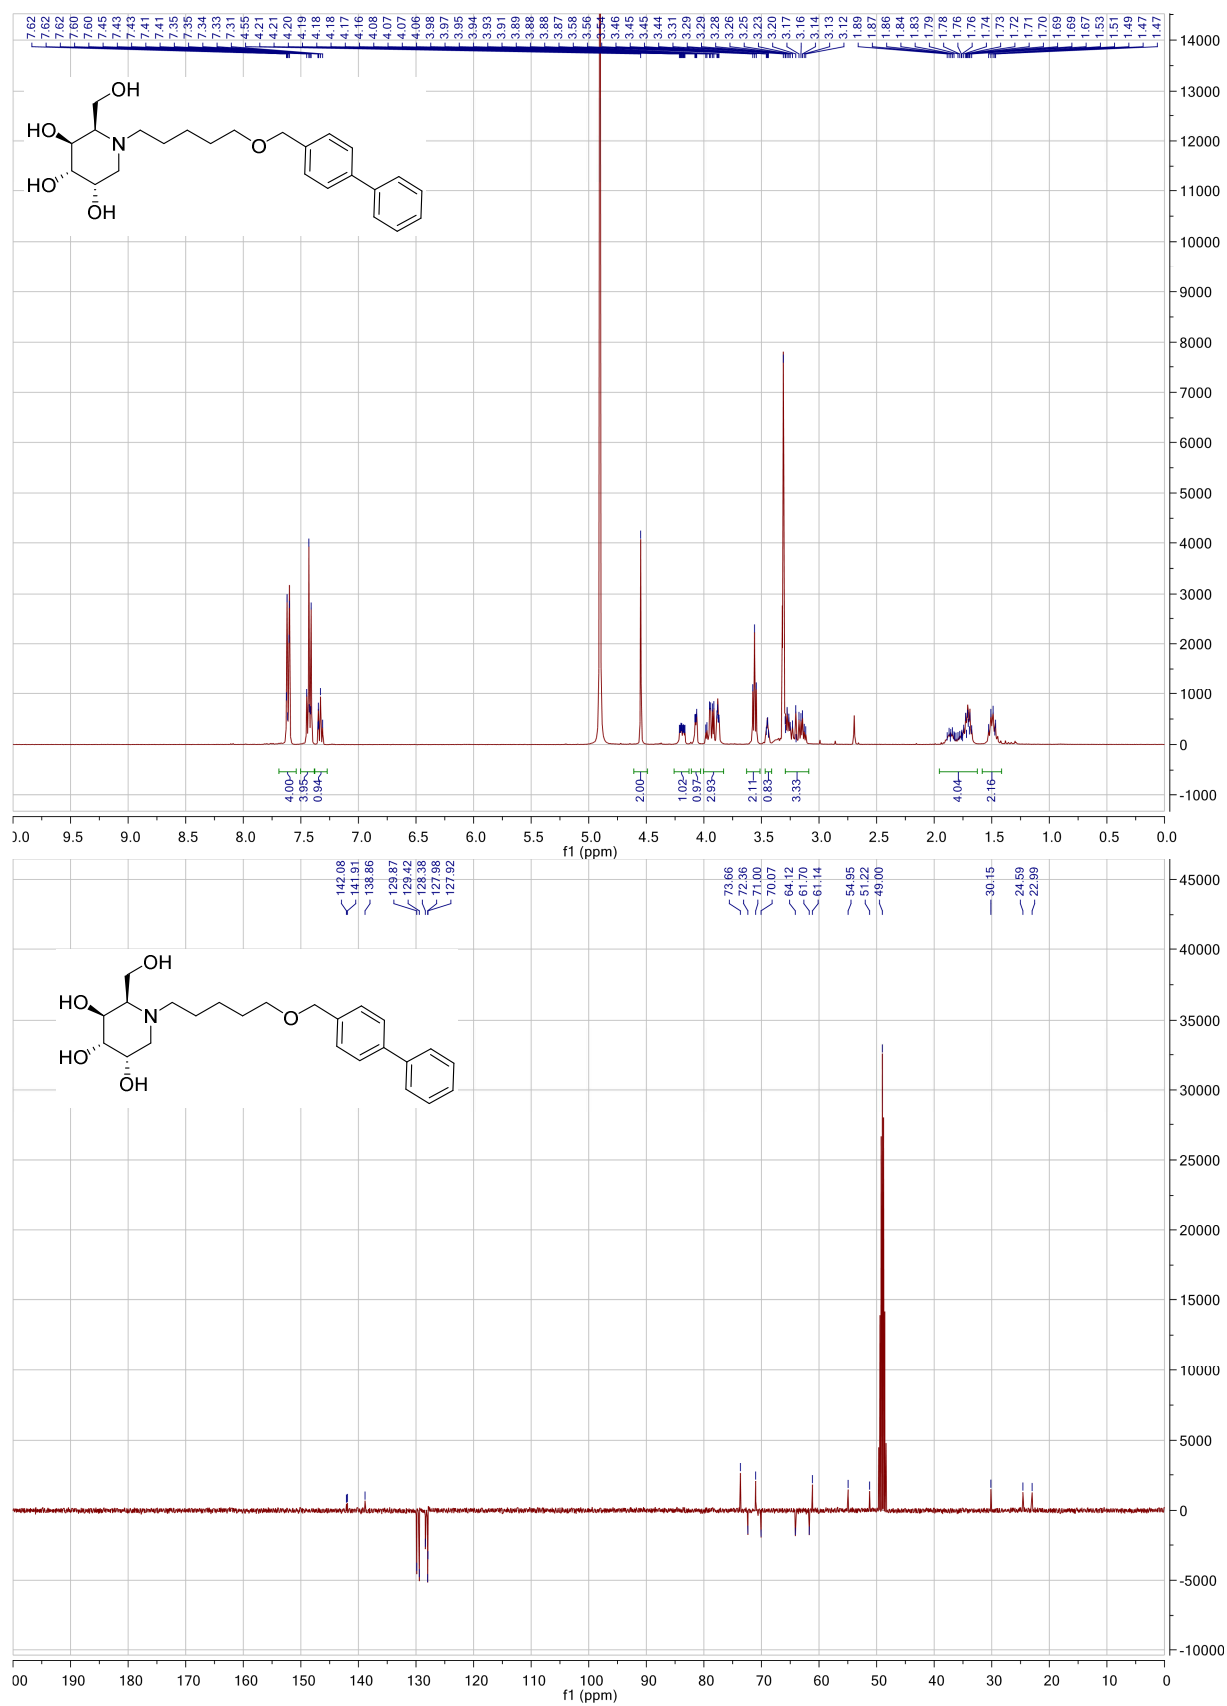





# <sup>1</sup>H-NMR and <sup>13</sup>C-NMR of compound C217 in MeOD.

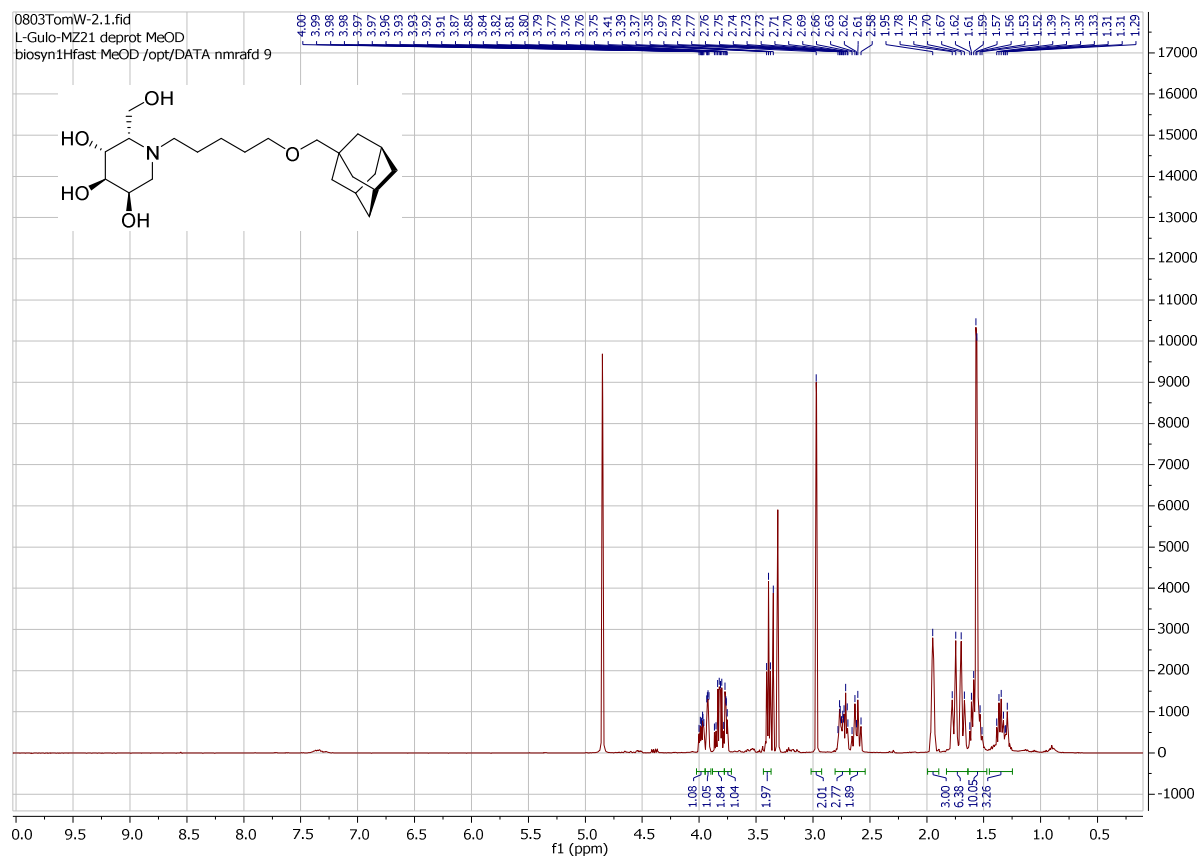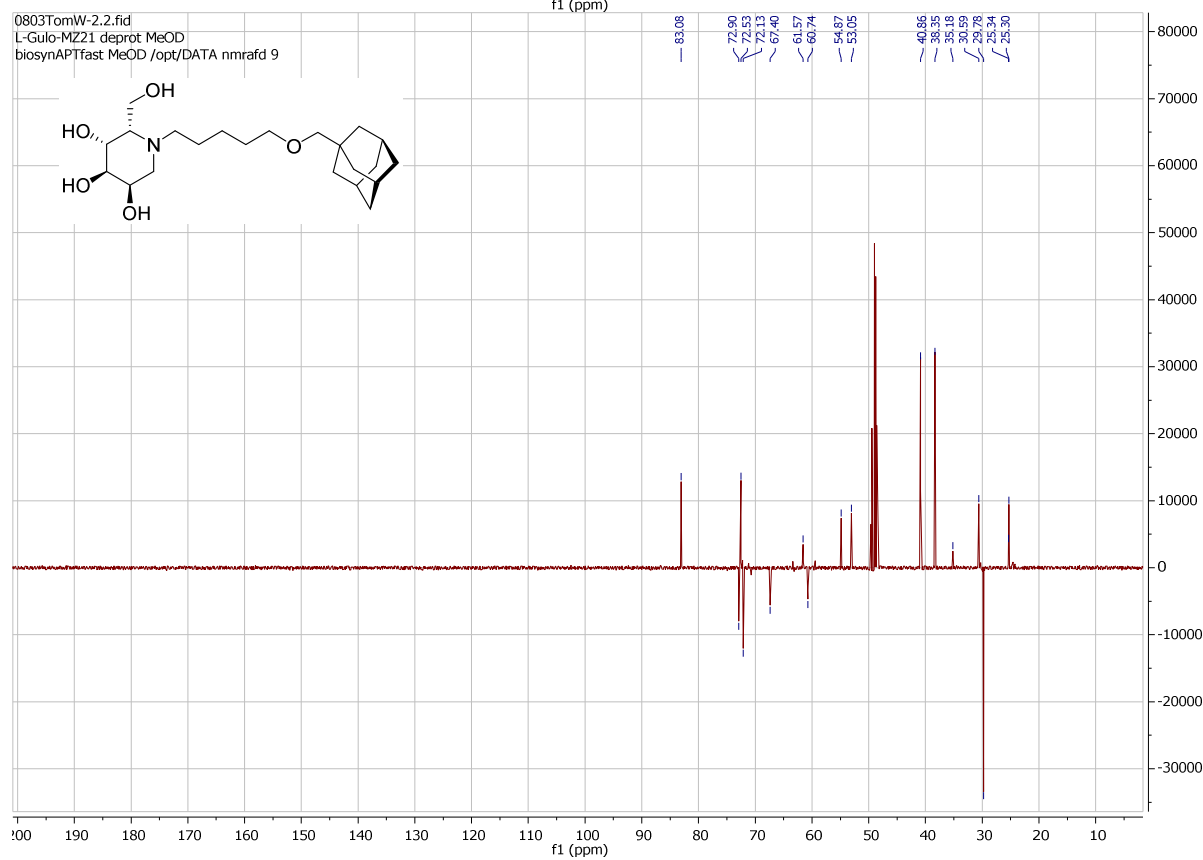

# <sup>1</sup>H-NMR and <sup>13</sup>C-NMR of compound C218 in MeOD.

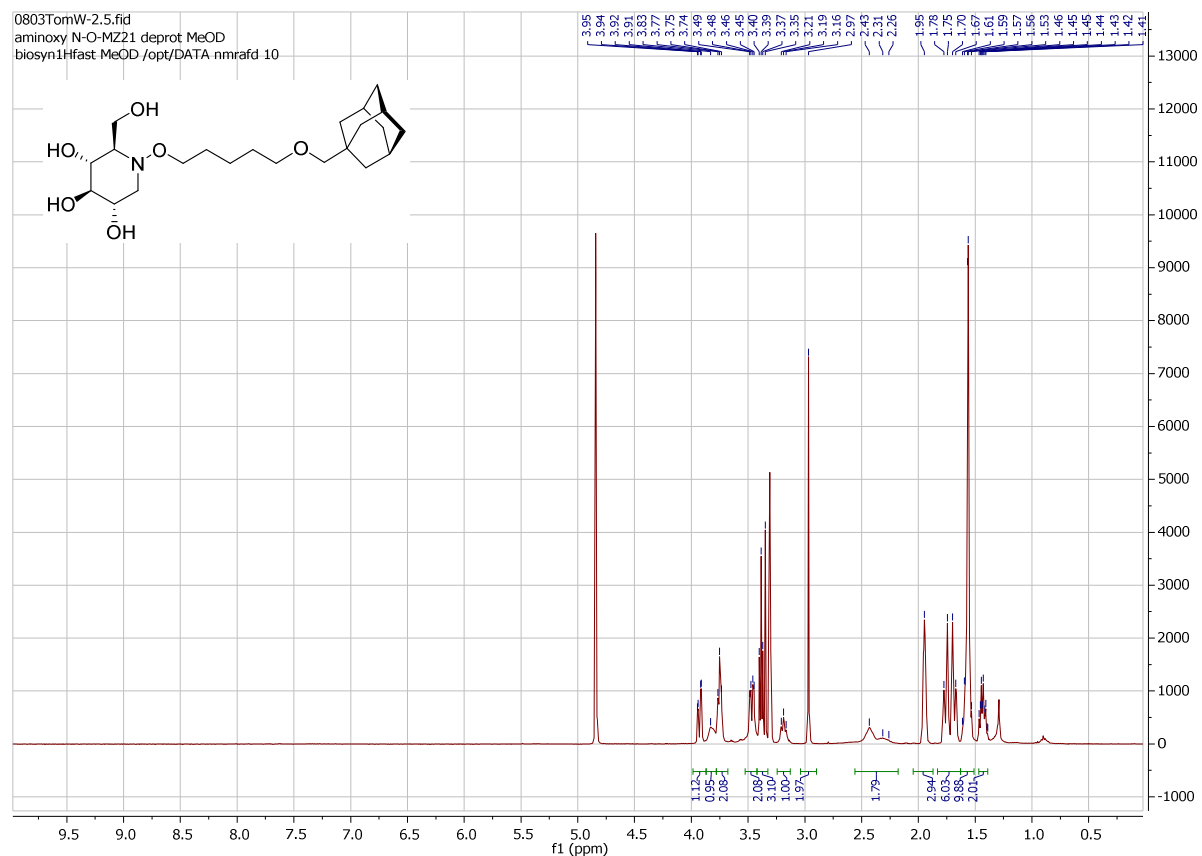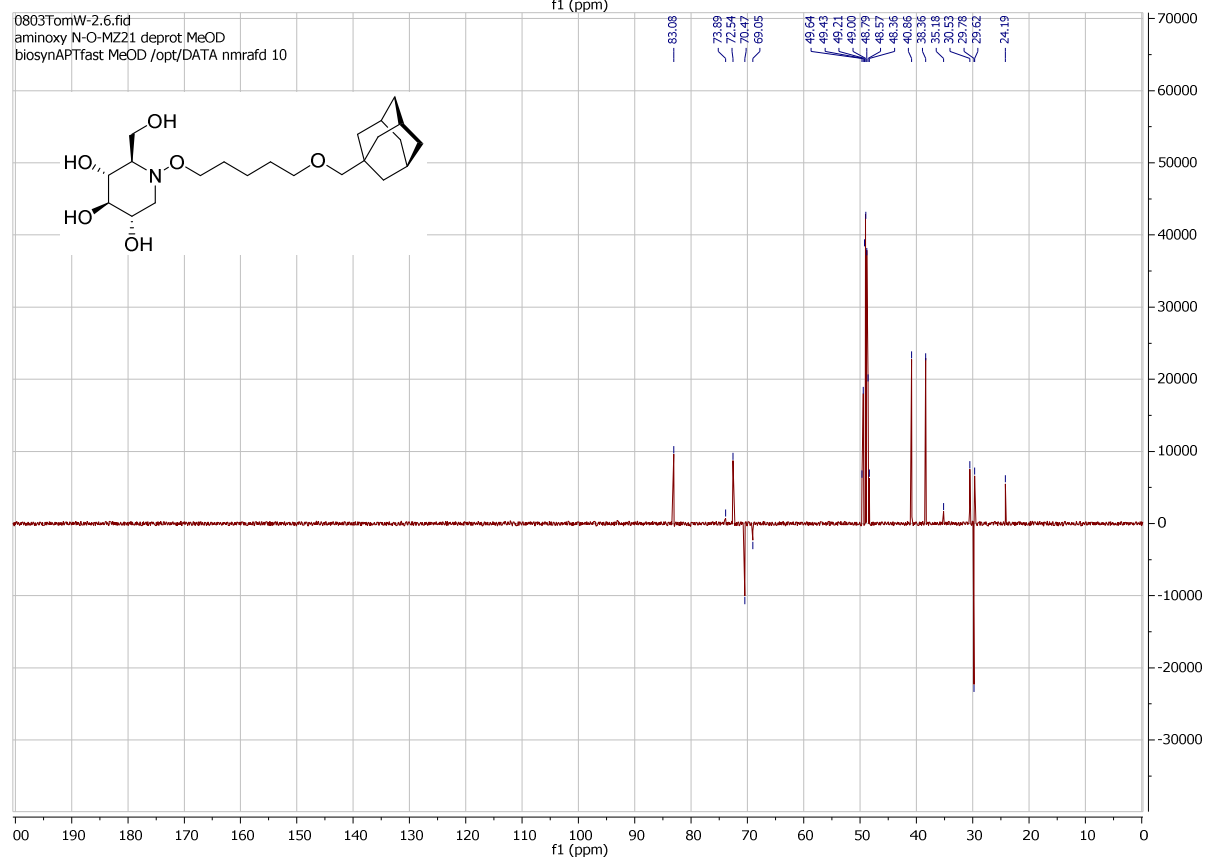

# $^1\text{H-NMR}$ and $^{13}\text{C-NMR}$ of compound C219.TFA in $\text{D}_2\text{O}$ .

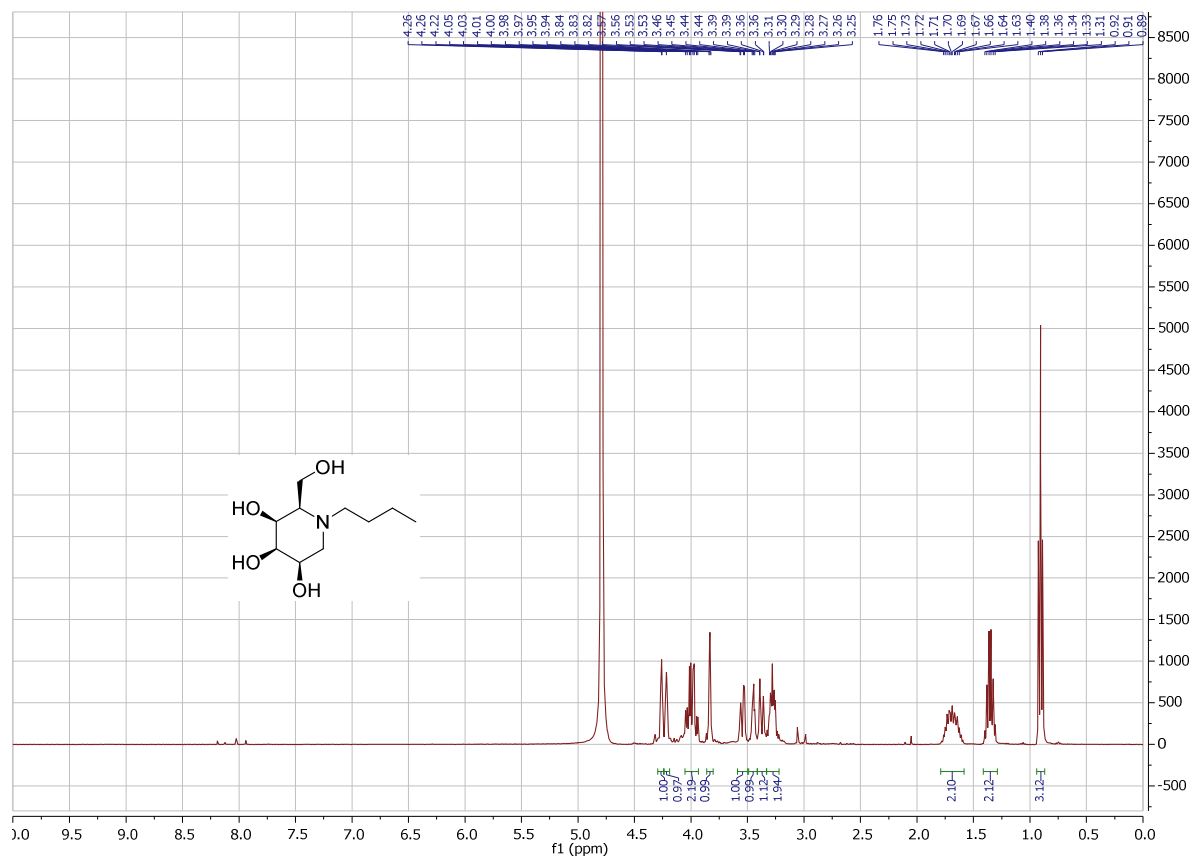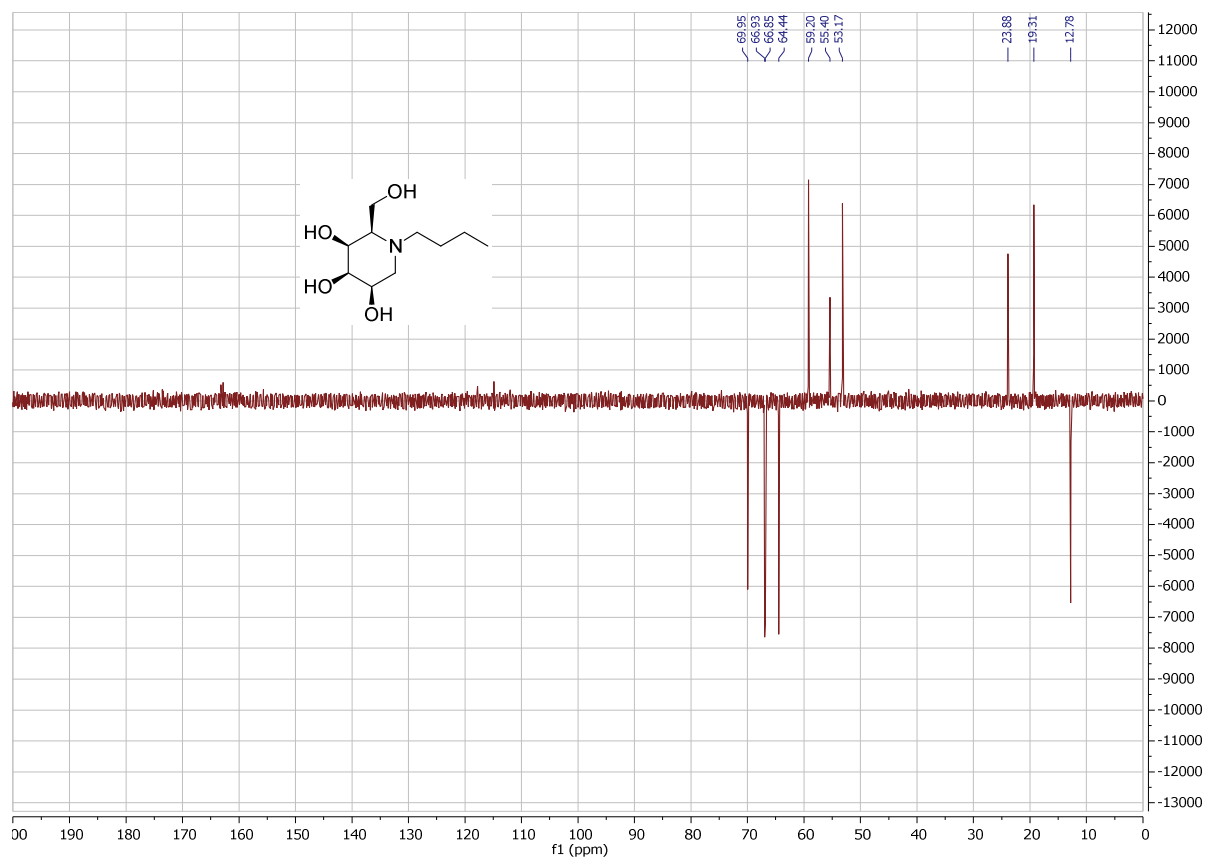



<sup>1</sup>H-NMR and <sup>13</sup>C-NMR of compound C223.TFA in D<sub>2</sub>O.

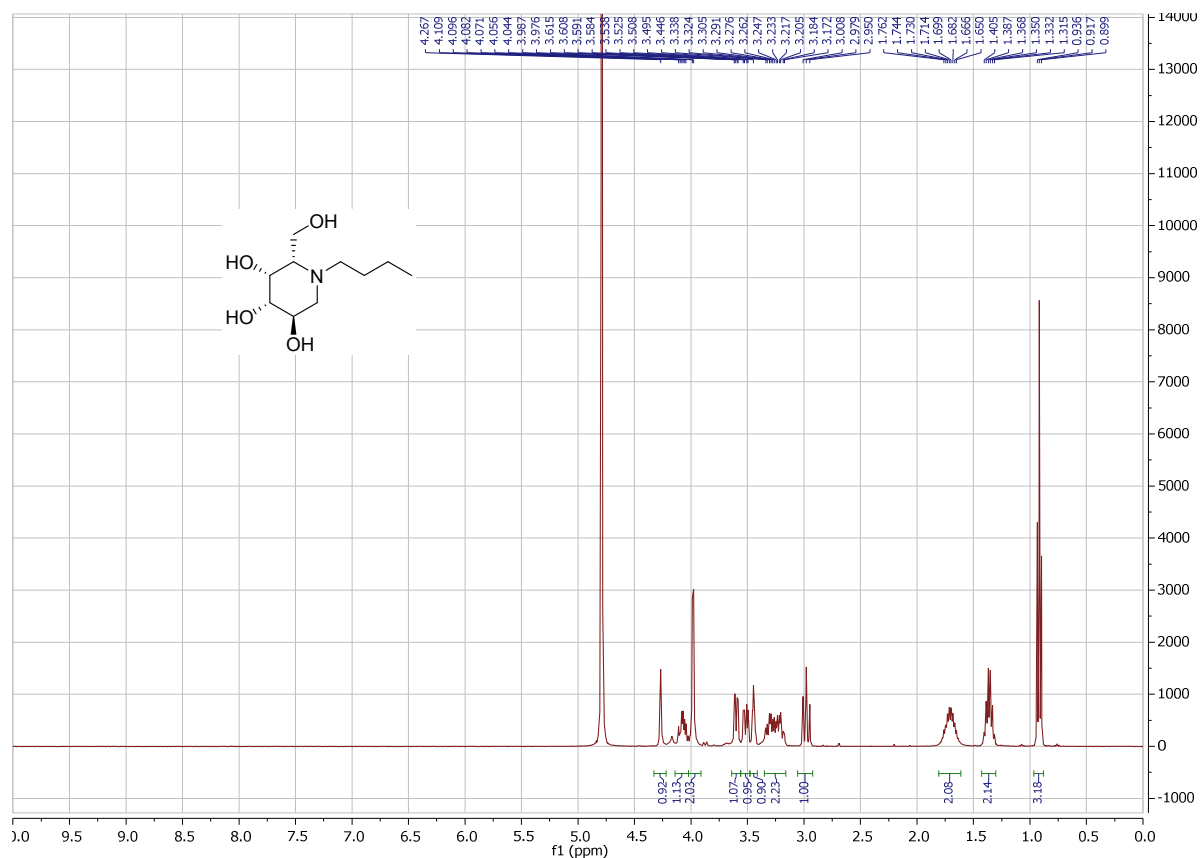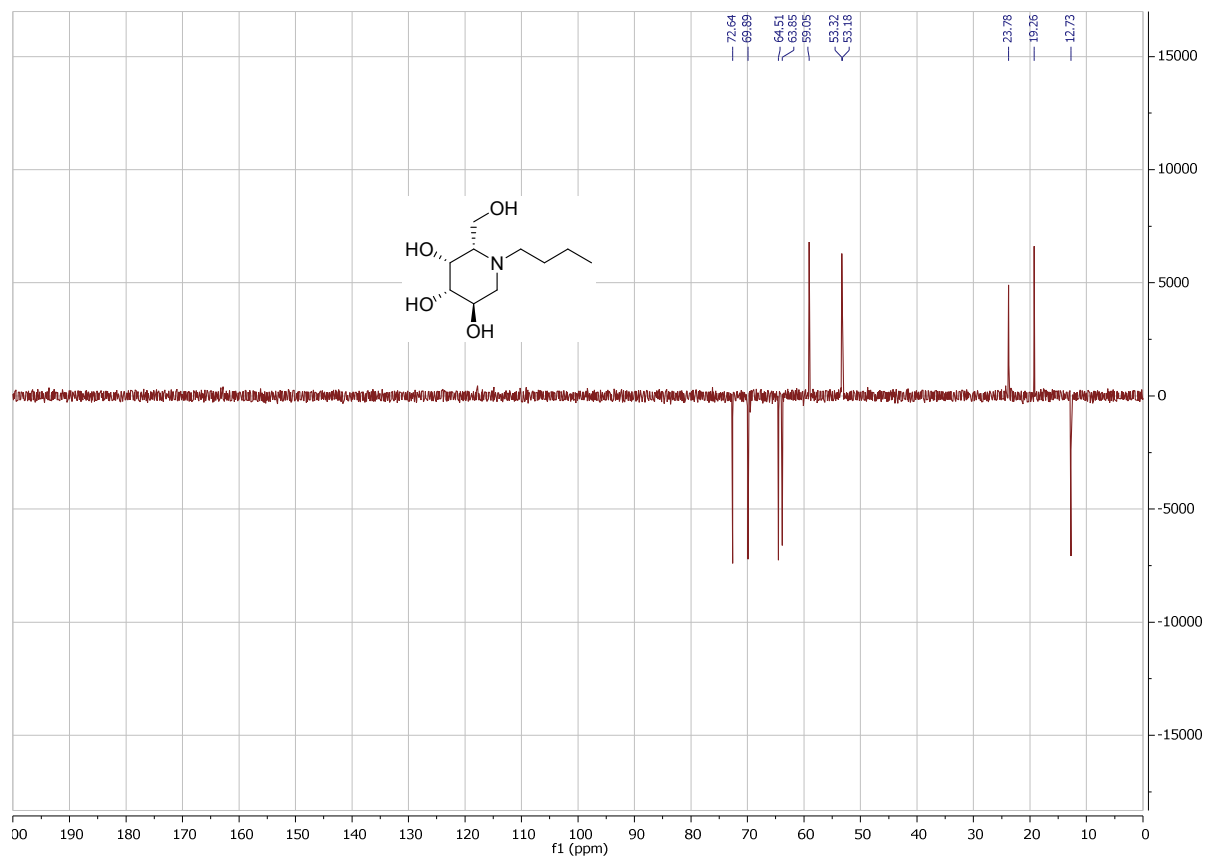



# $^1\text{H-NMR}$ and $^{13}\text{C-NMR}$ of compound C225.TFA in $\text{D}_2\text{O}$ .

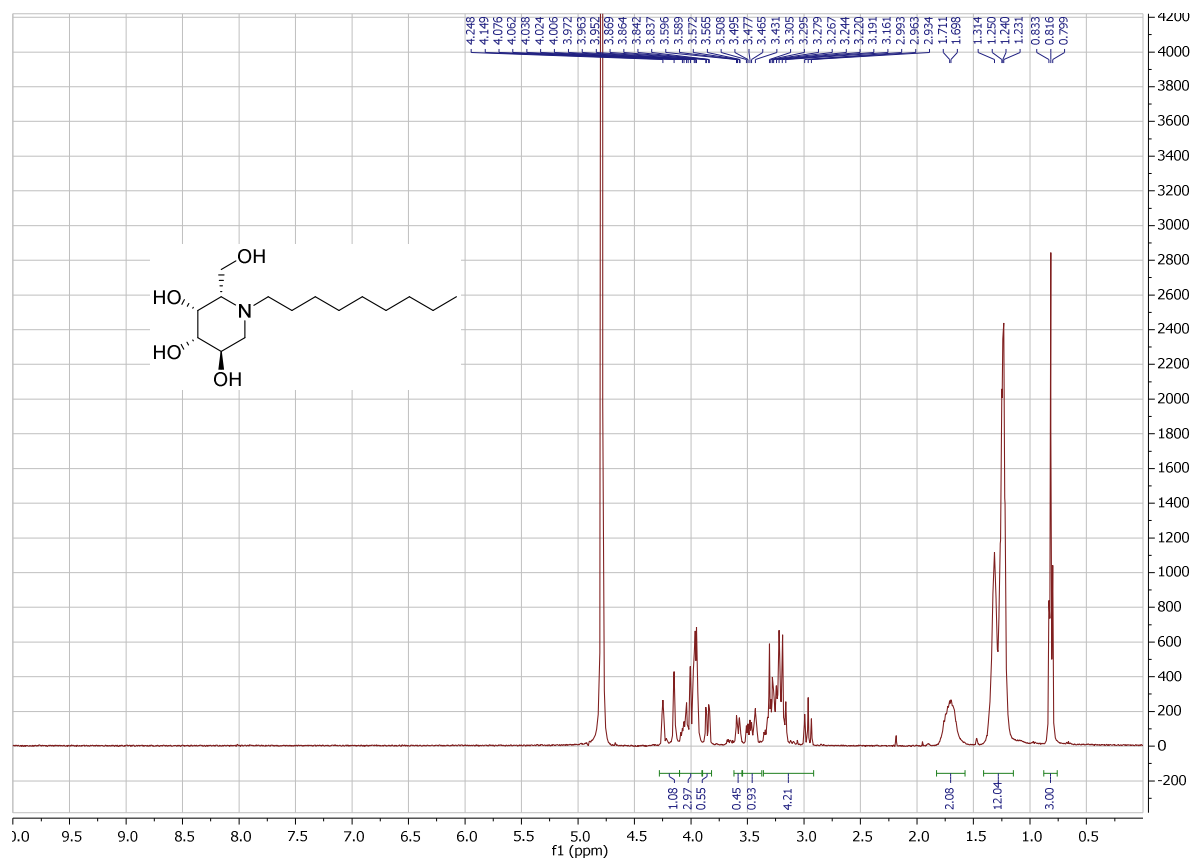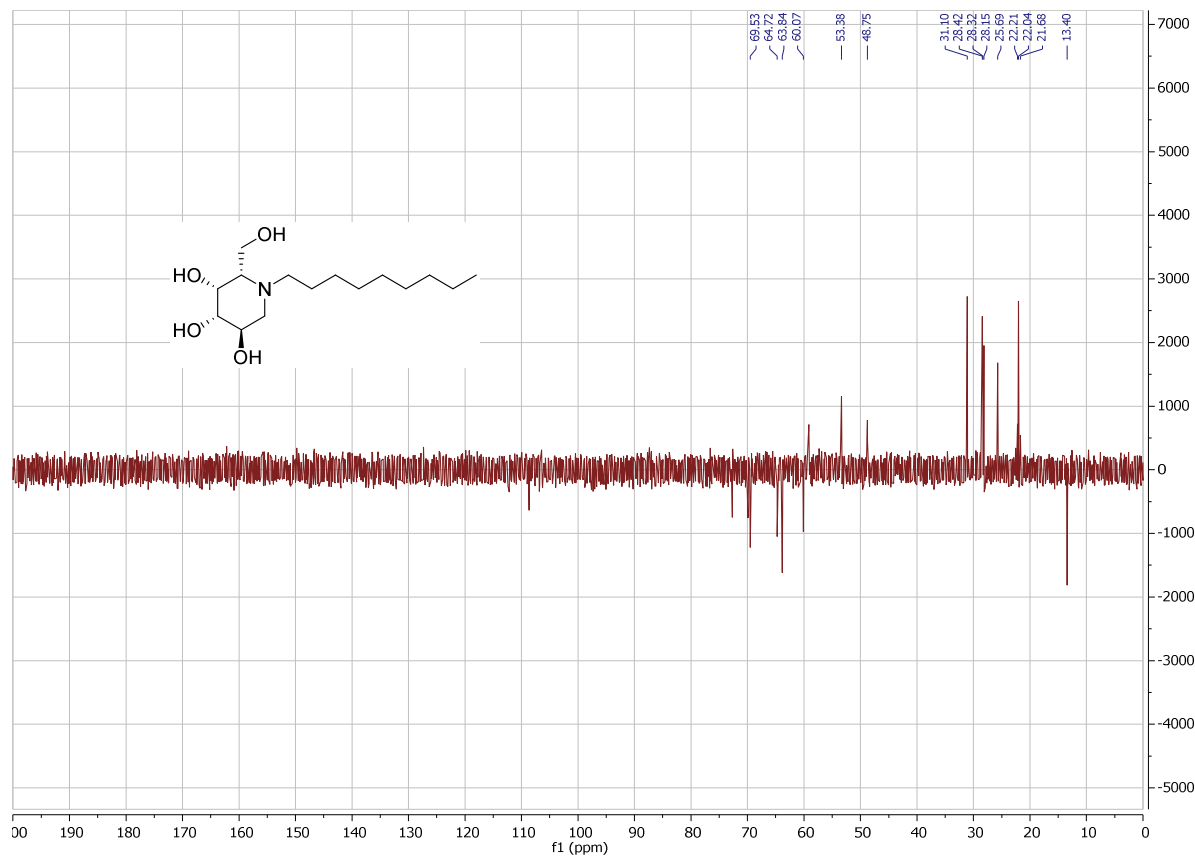

# <sup>1</sup>H-NMR and <sup>13</sup>C-NMR of compound C227.TFA in D<sub>2</sub>O.

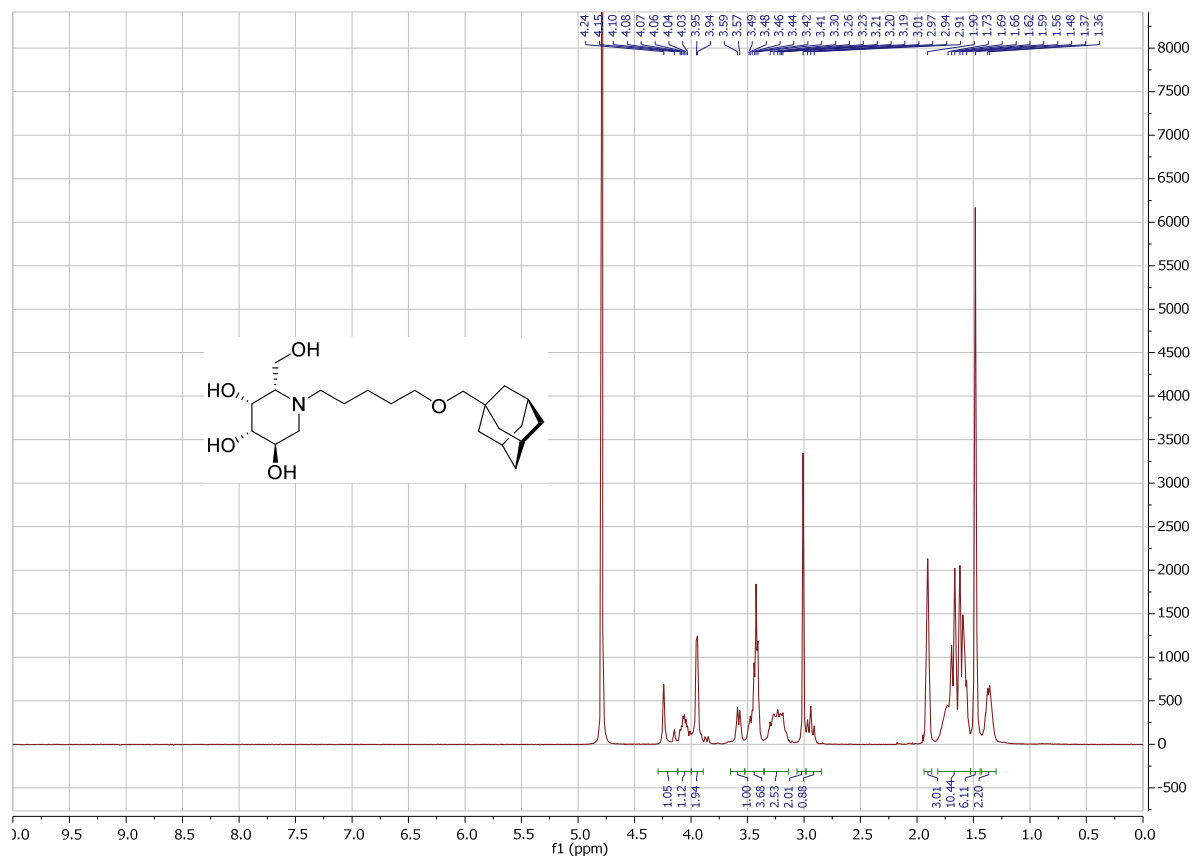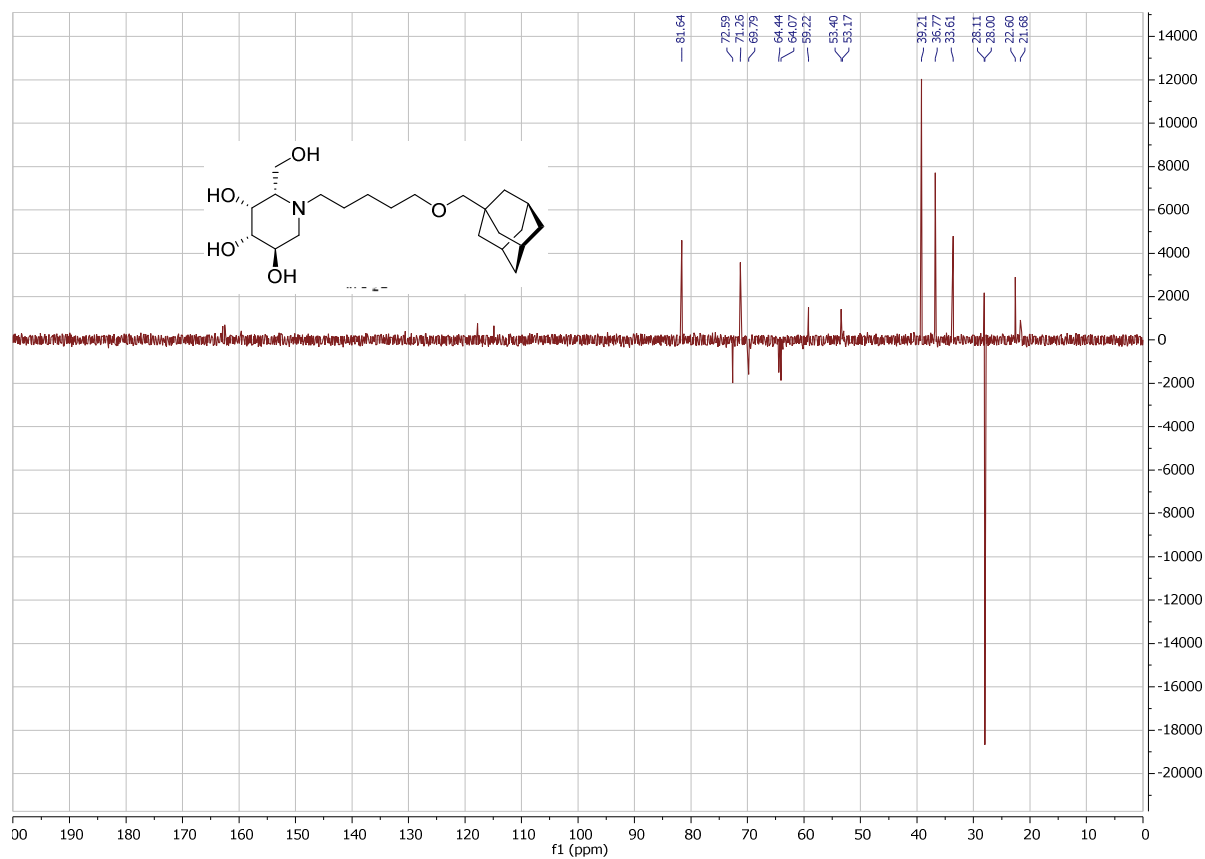





<sup>1</sup>H-NMR and <sup>13</sup>C-NMR of compound C234.TFA in MeOD.

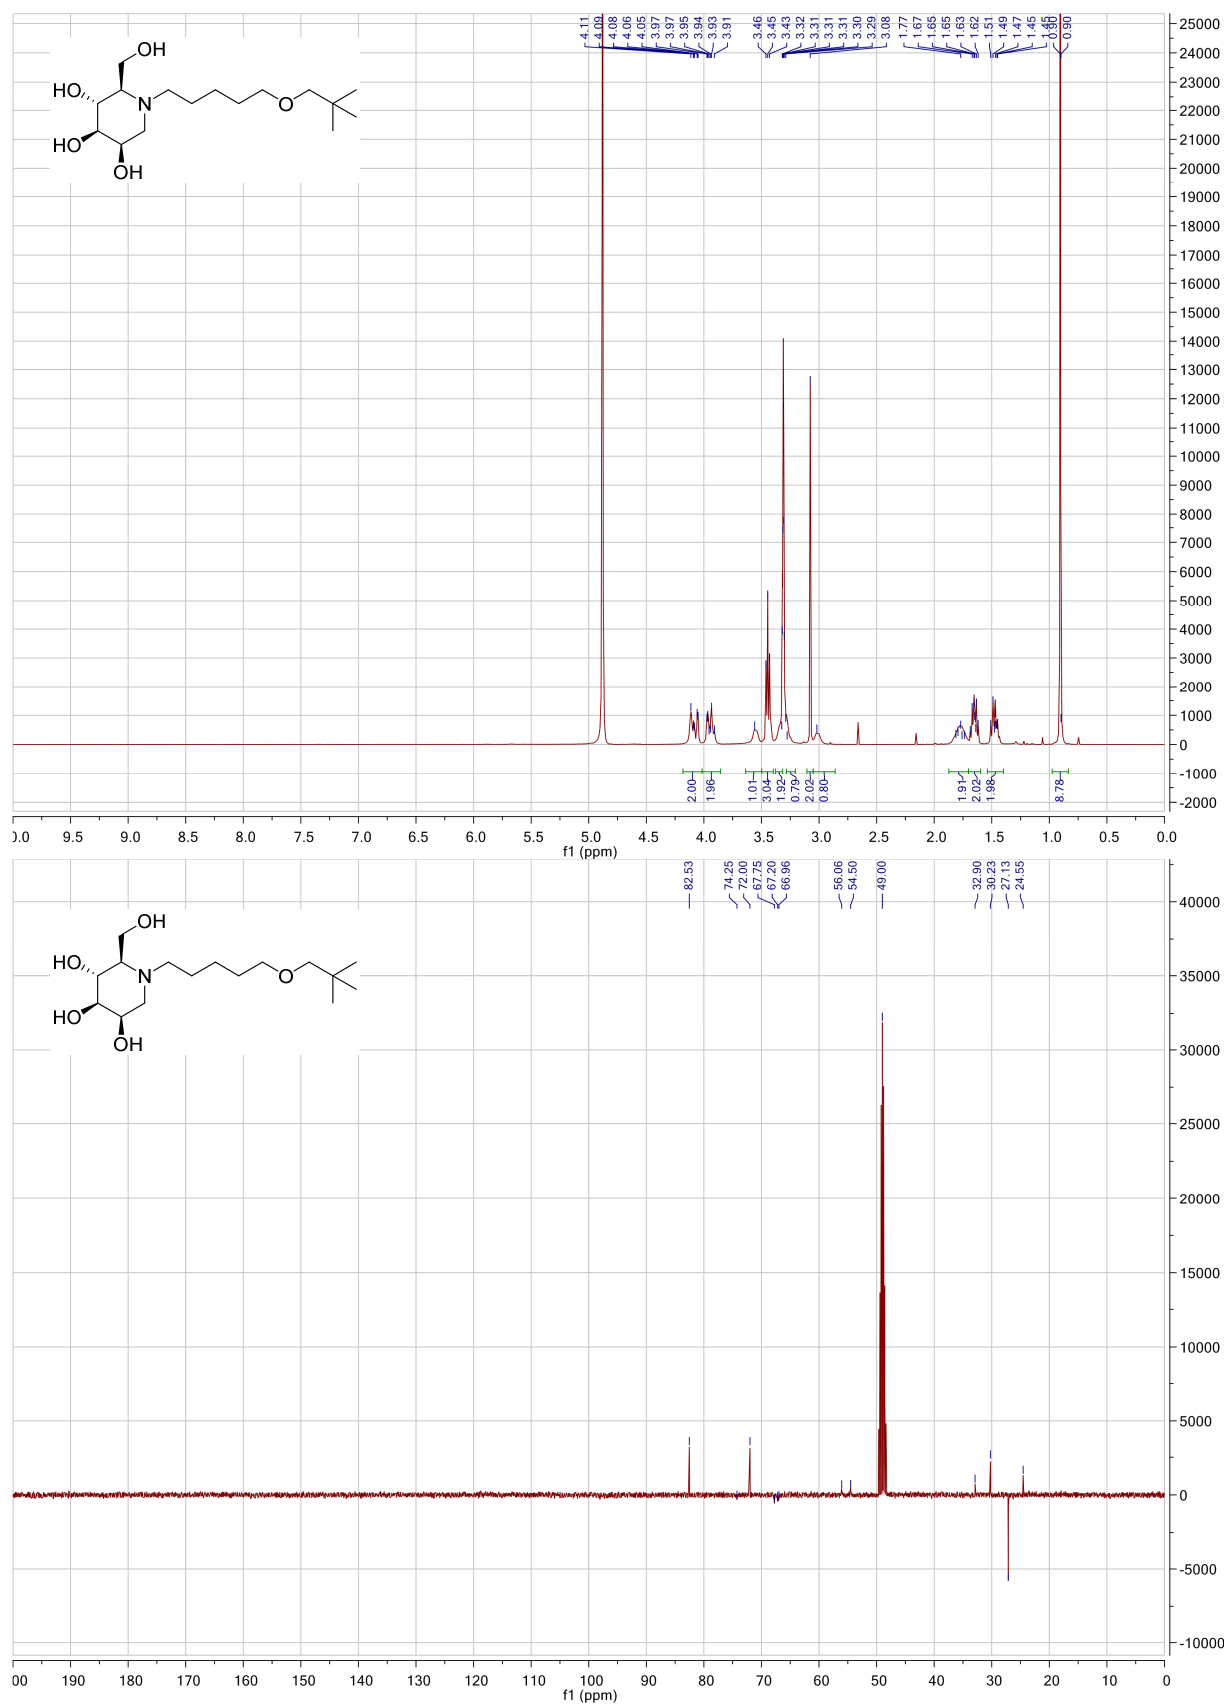

**<sup>1</sup>H-NMR and <sup>13</sup>C-NMR of compound C236.TFA in MeOD.**

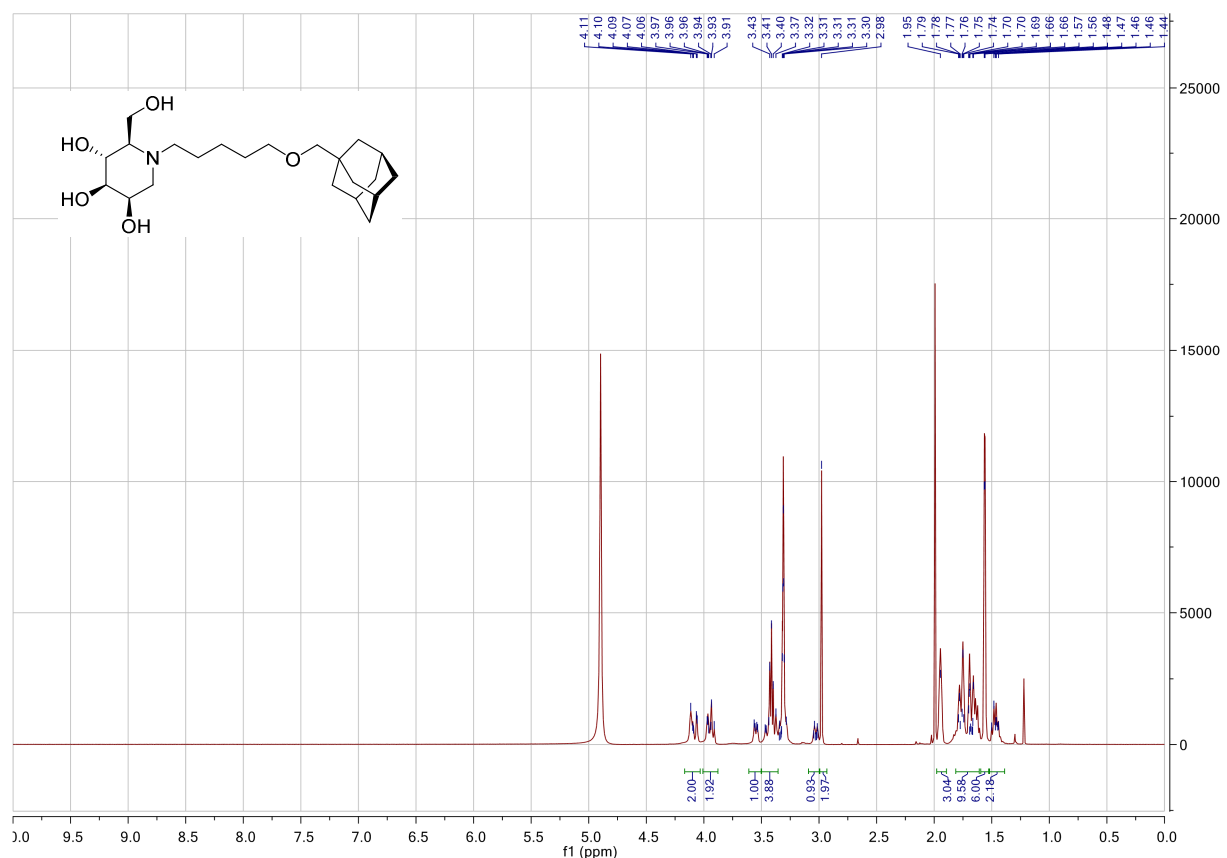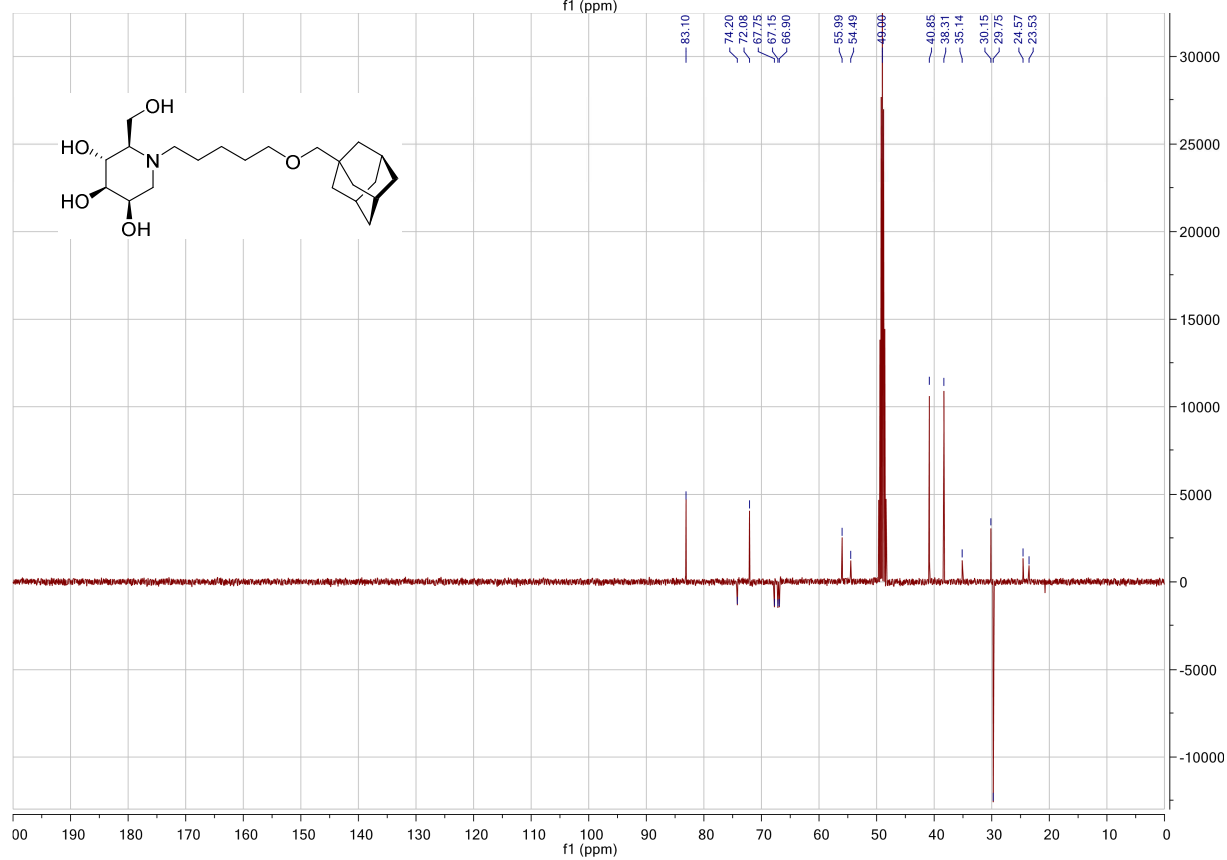

# <sup>1</sup>H-NMR and <sup>13</sup>C-NMR of compound C238.TFA in MeOD.

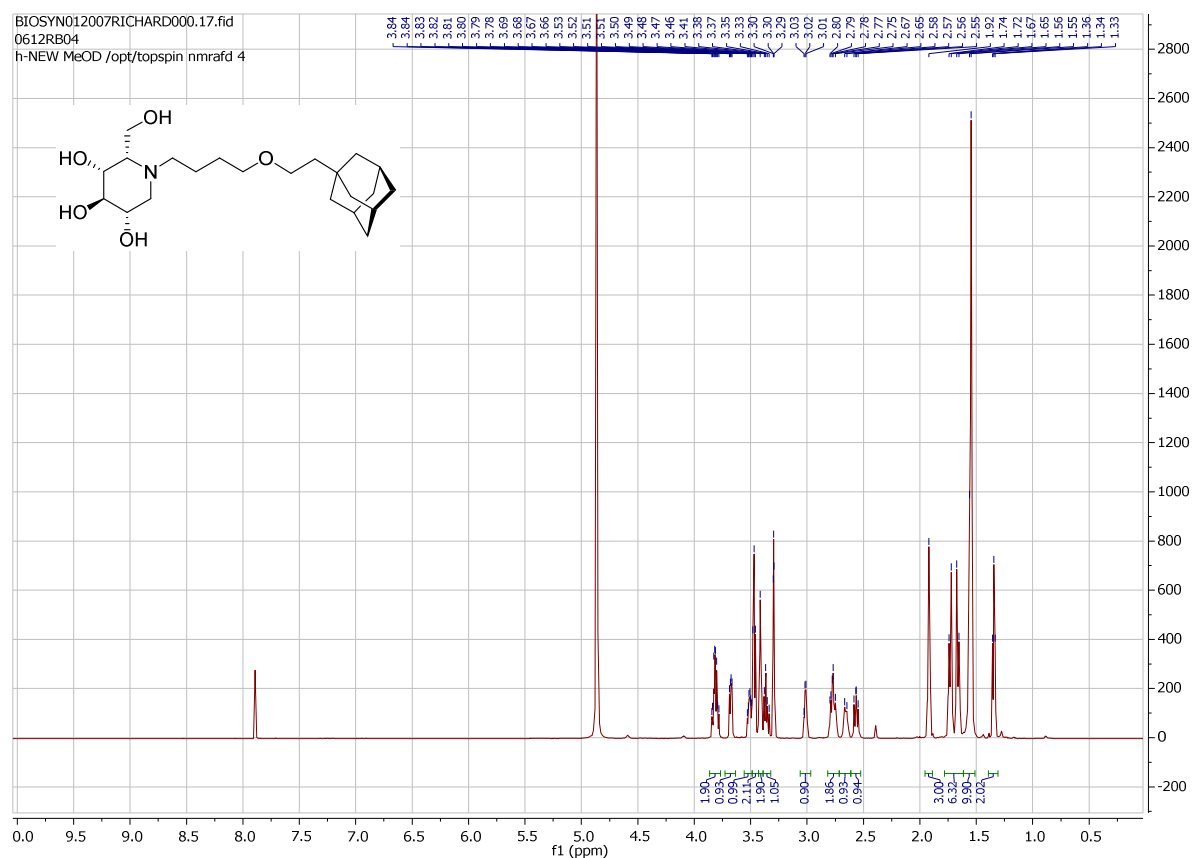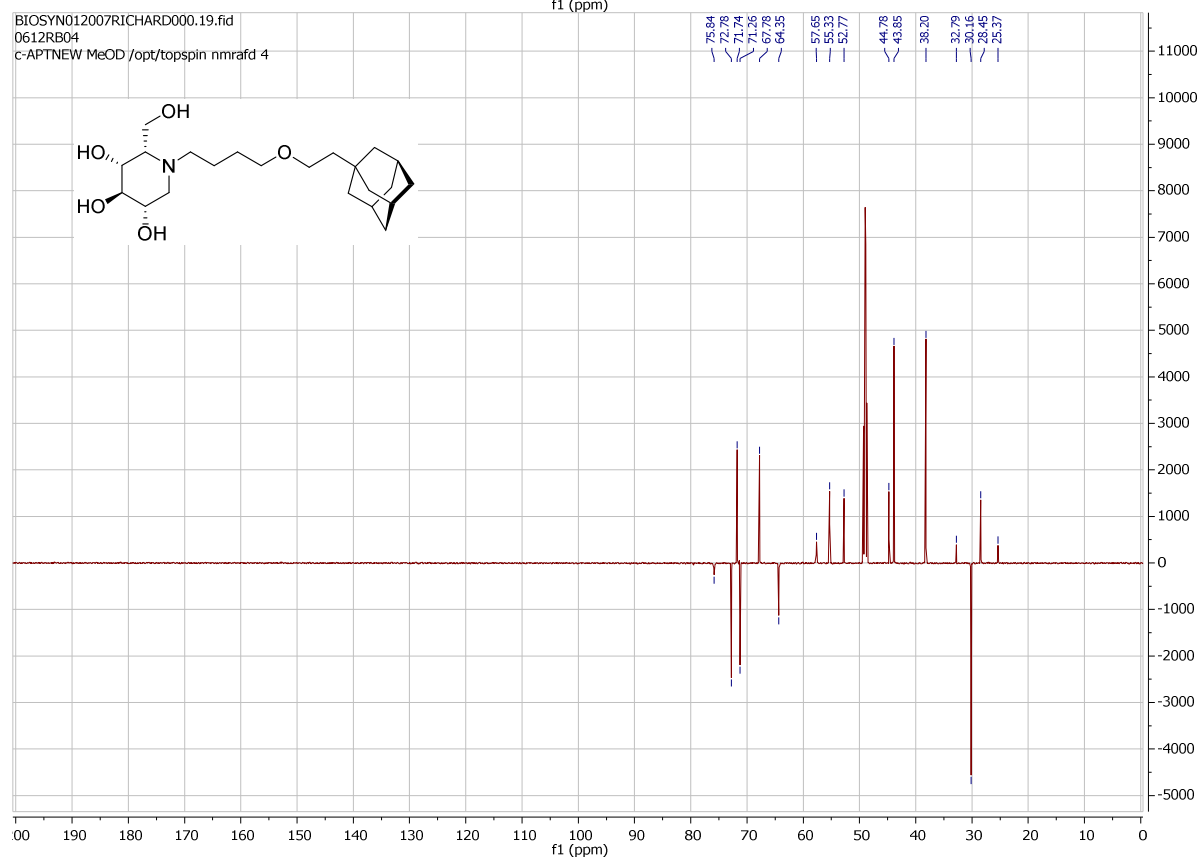

# <sup>1</sup>H-NMR and <sup>13</sup>C-NMR of compound C239.TFA in MeOD.

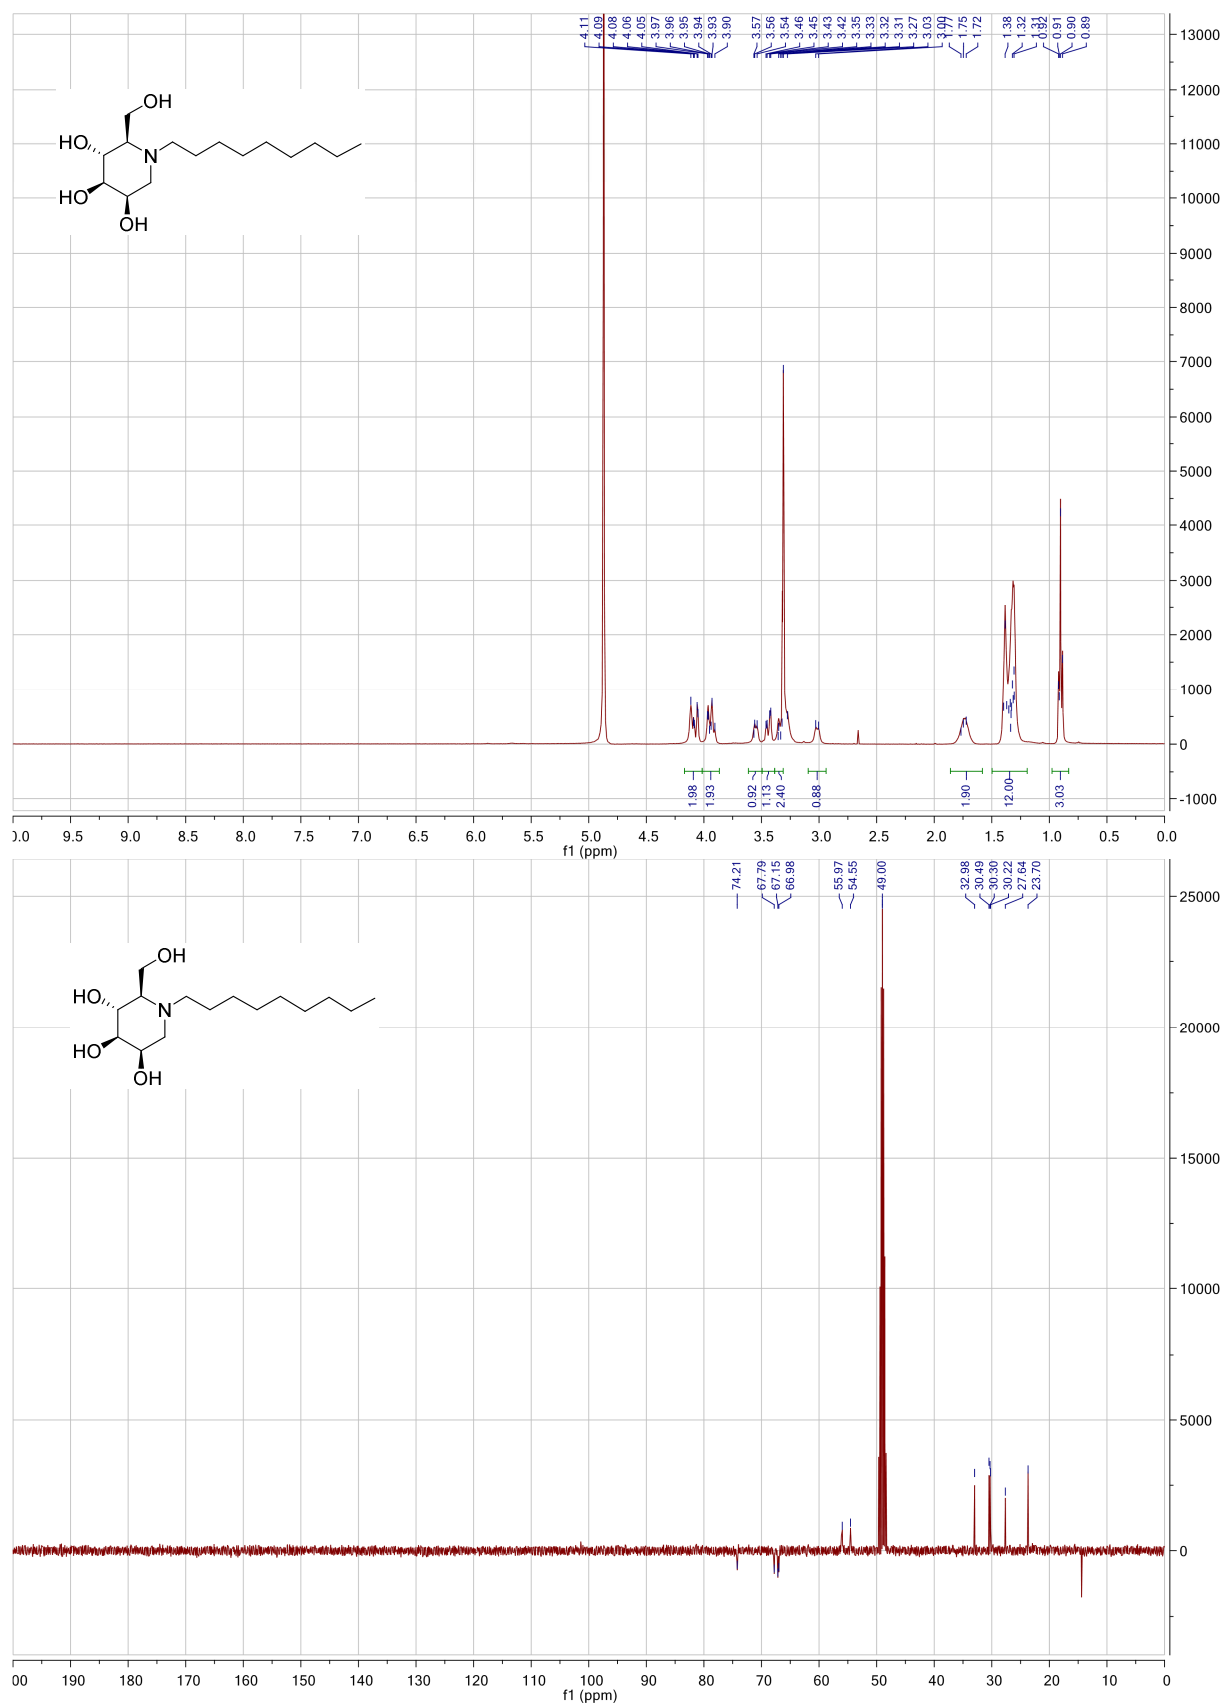



# $^1\text{H-NMR}$ and $^{13}\text{C-NMR}$ of compound C241 in $\text{H}_2\text{O}$ .

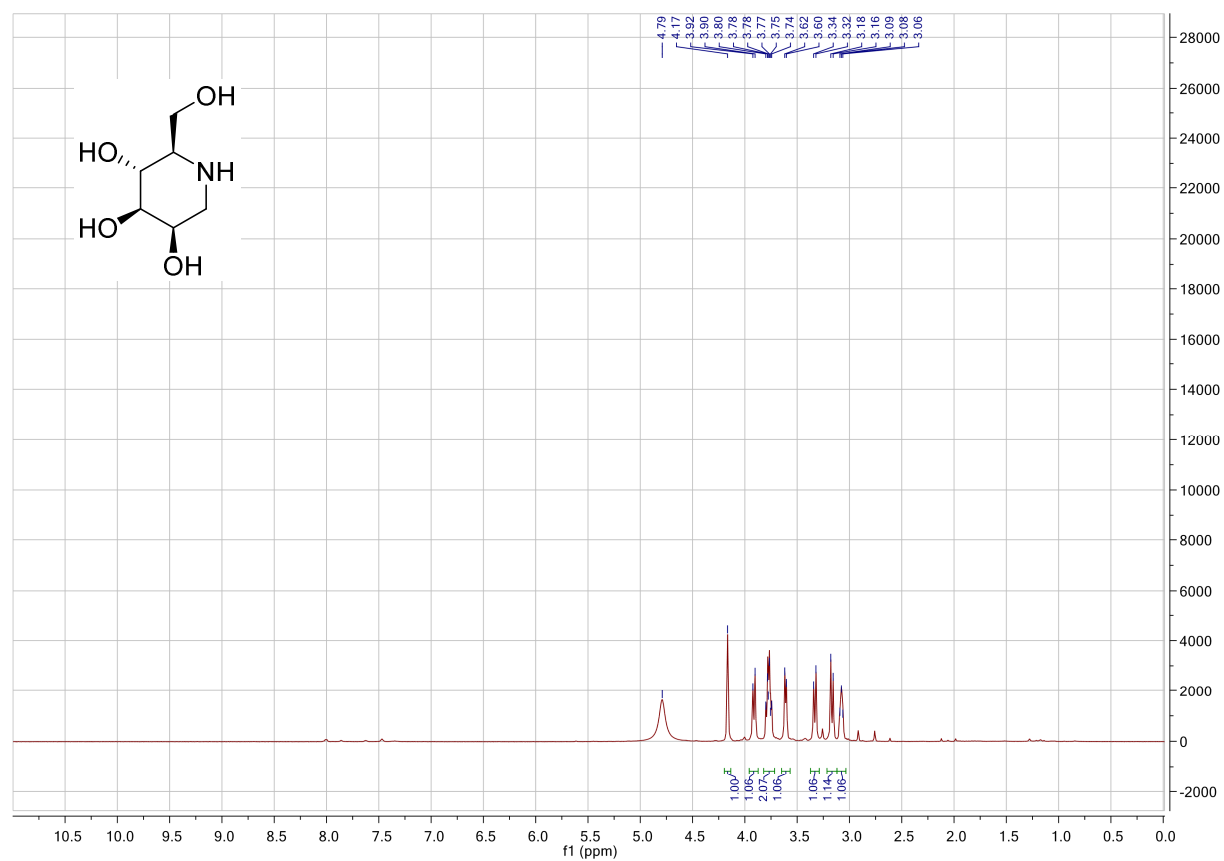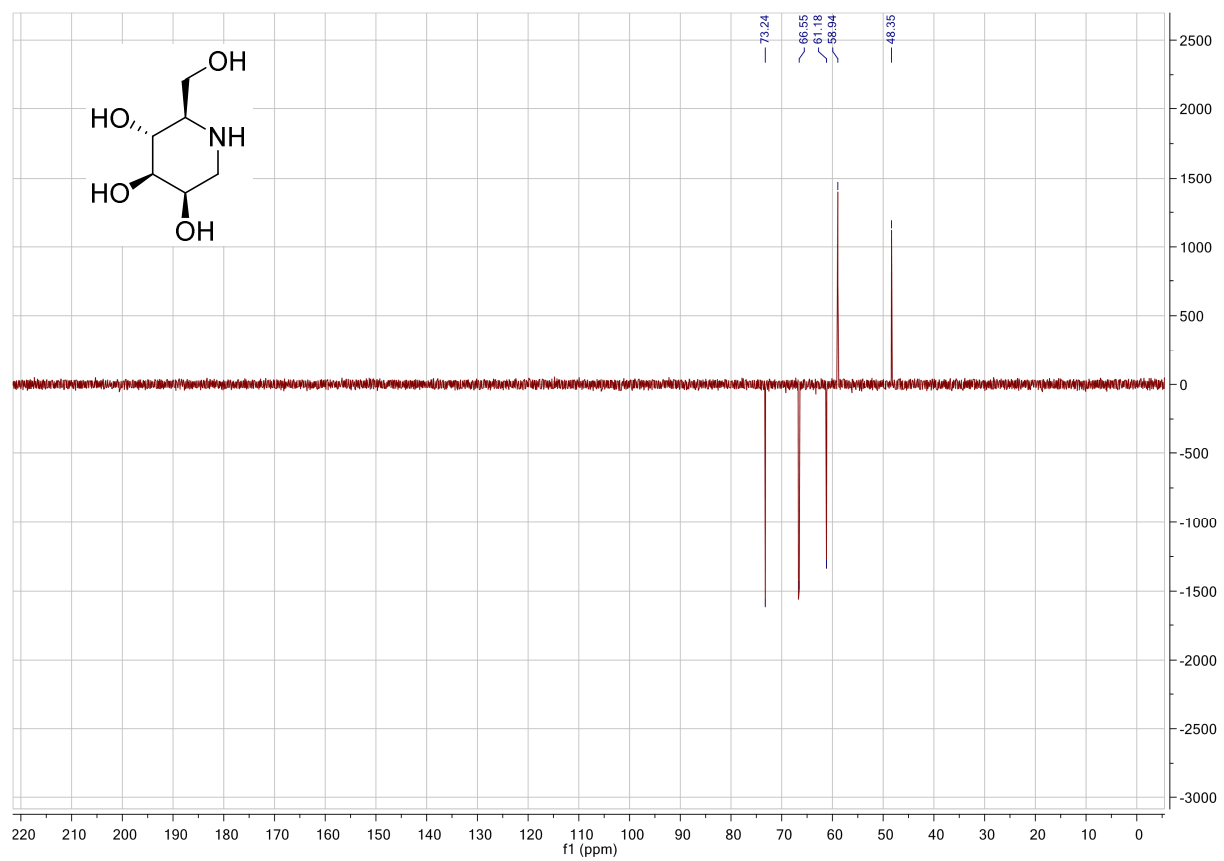

<sup>1</sup>H-NMR and <sup>13</sup>C-NMR of compound C243.TFA in MeOD.

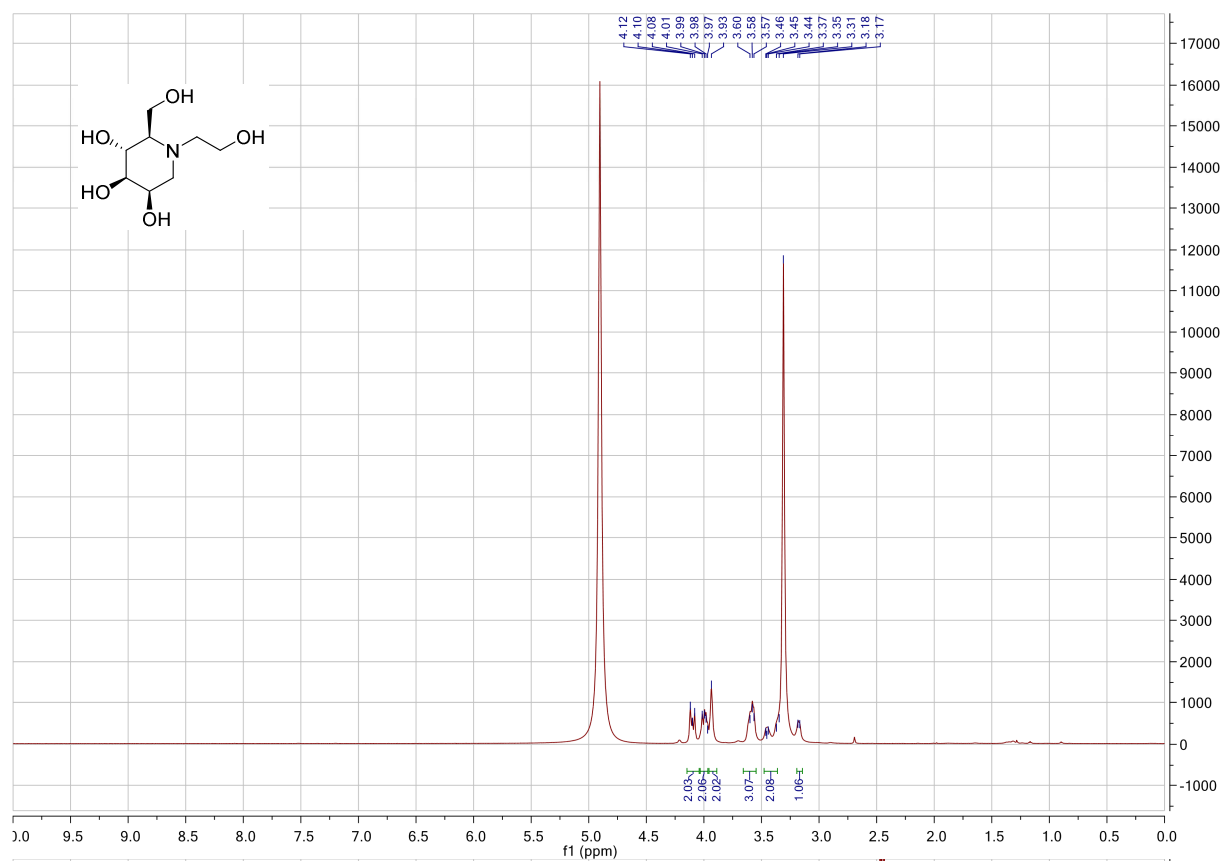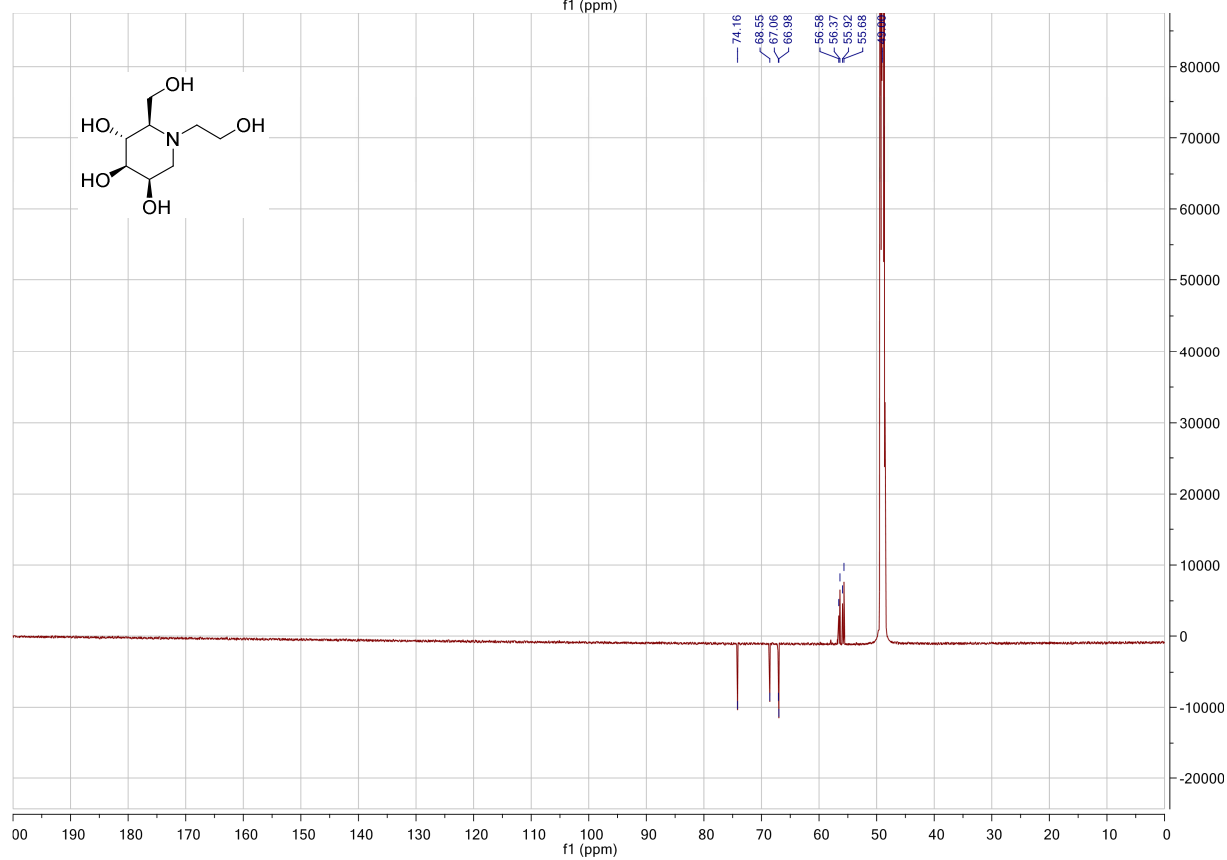

# $^1\text{H-NMR}$ and $^{13}\text{C-NMR}$ of compound C245 in $\text{D}_2\text{O}$ .

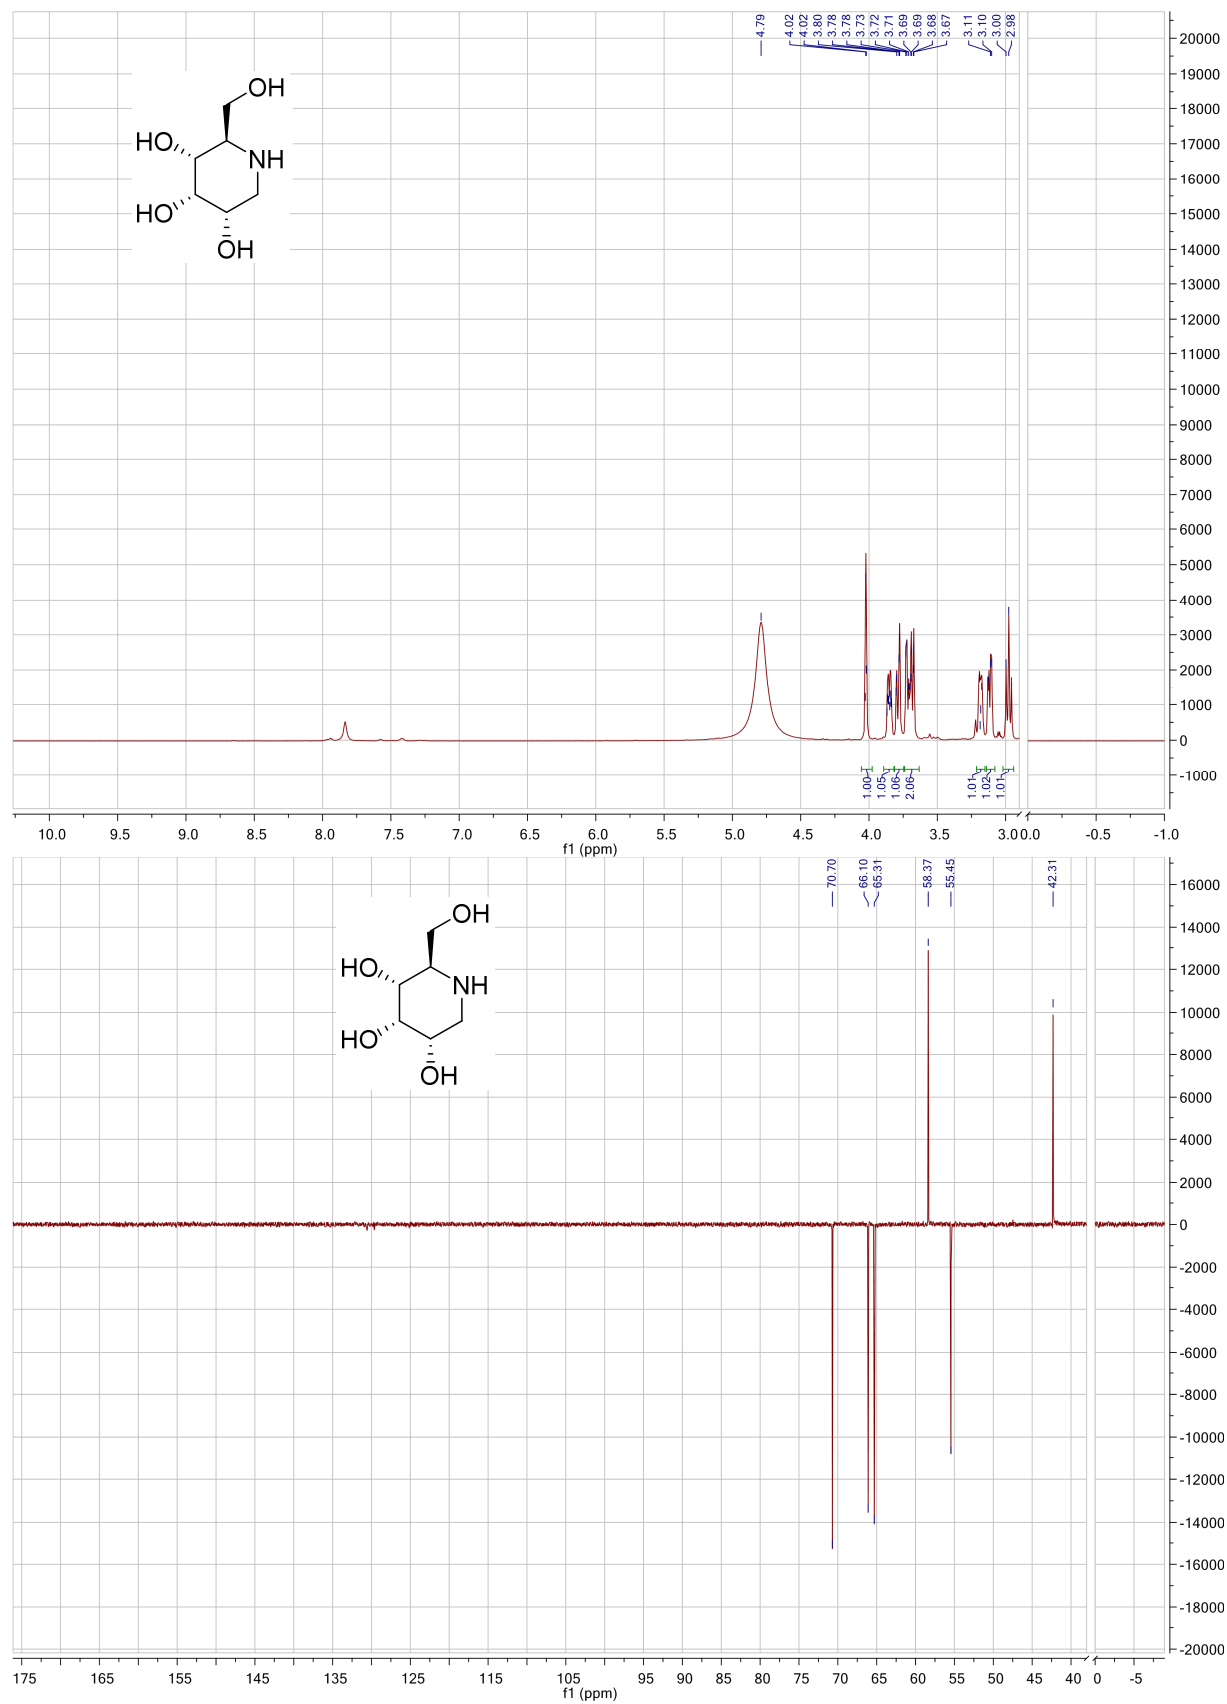

# <sup>1</sup>H-NMR and <sup>13</sup>C-NMR of compound C247.TFA in MeOD.

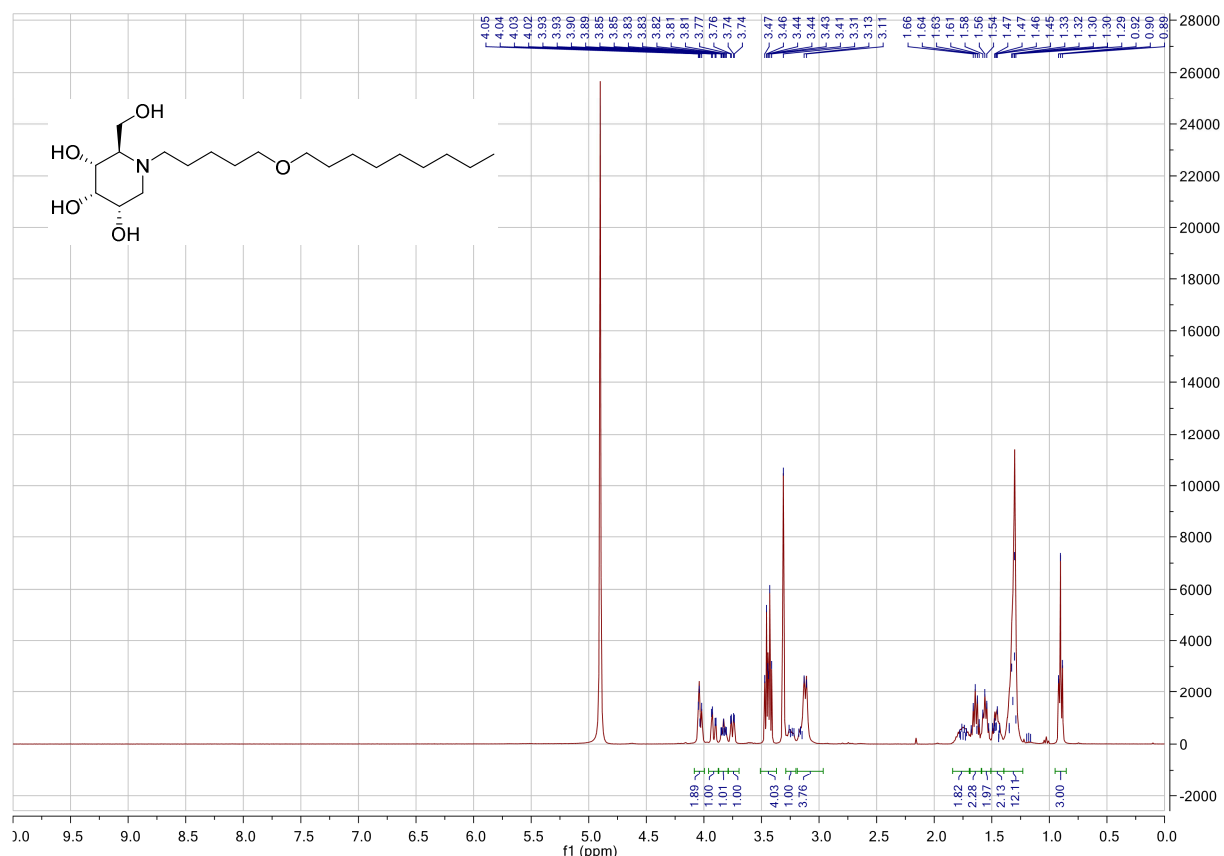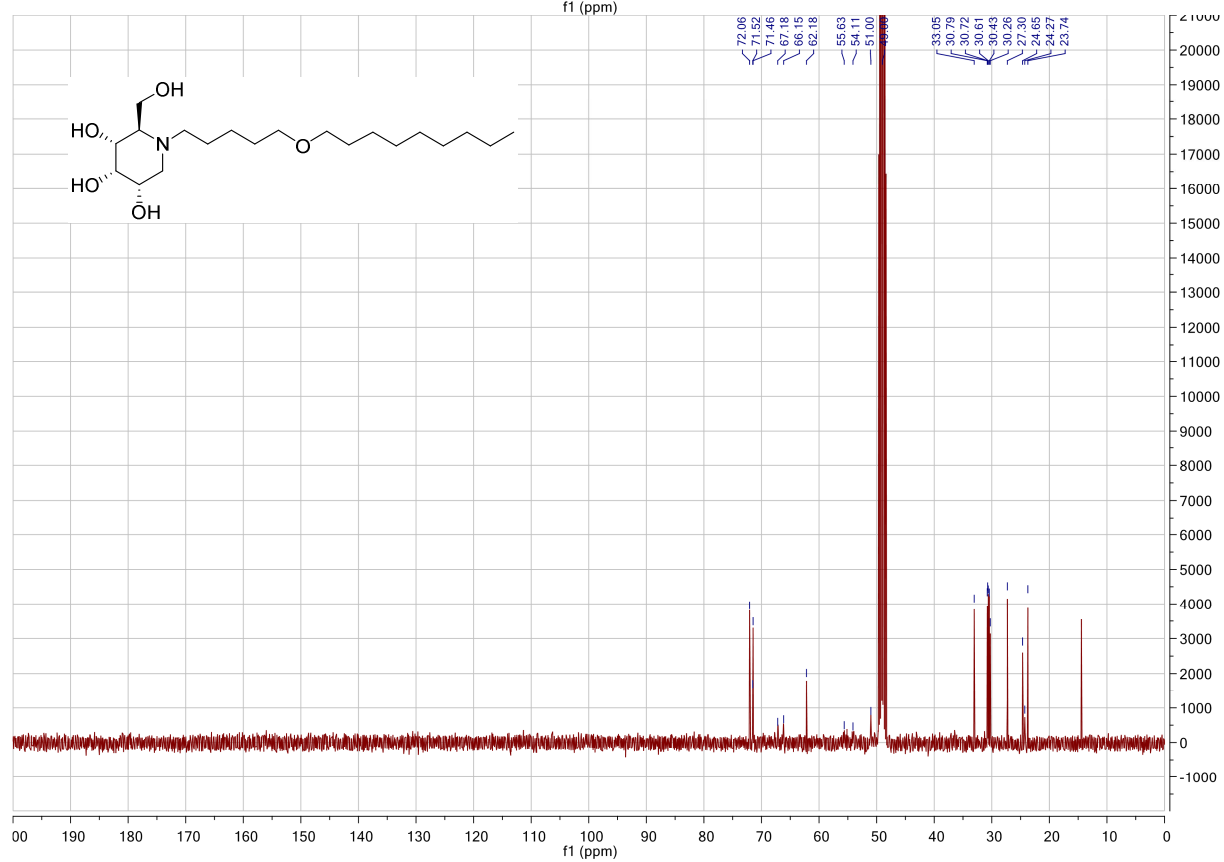

**$^1\text{H-NMR}$  and  $^{13}\text{C-NMR}$  of compound C253.TFA in  $\text{D}_2\text{O}$ .**

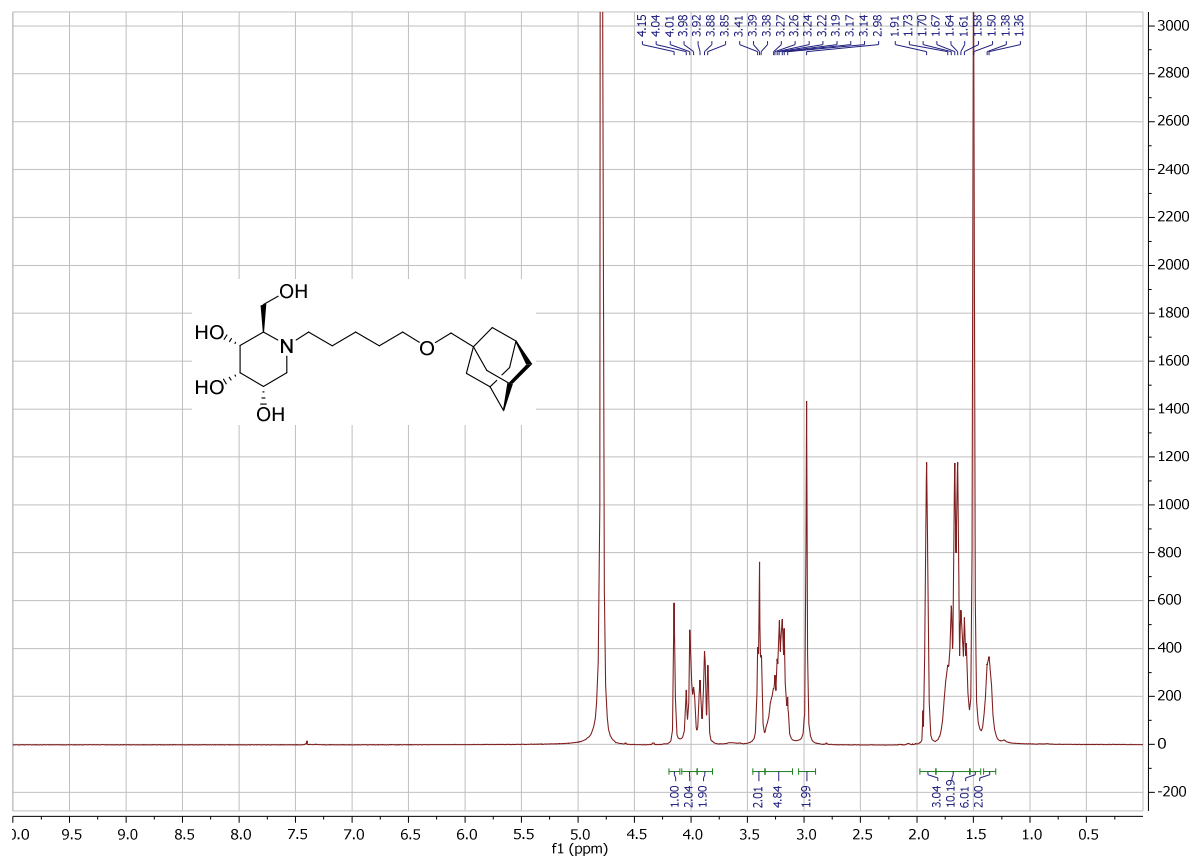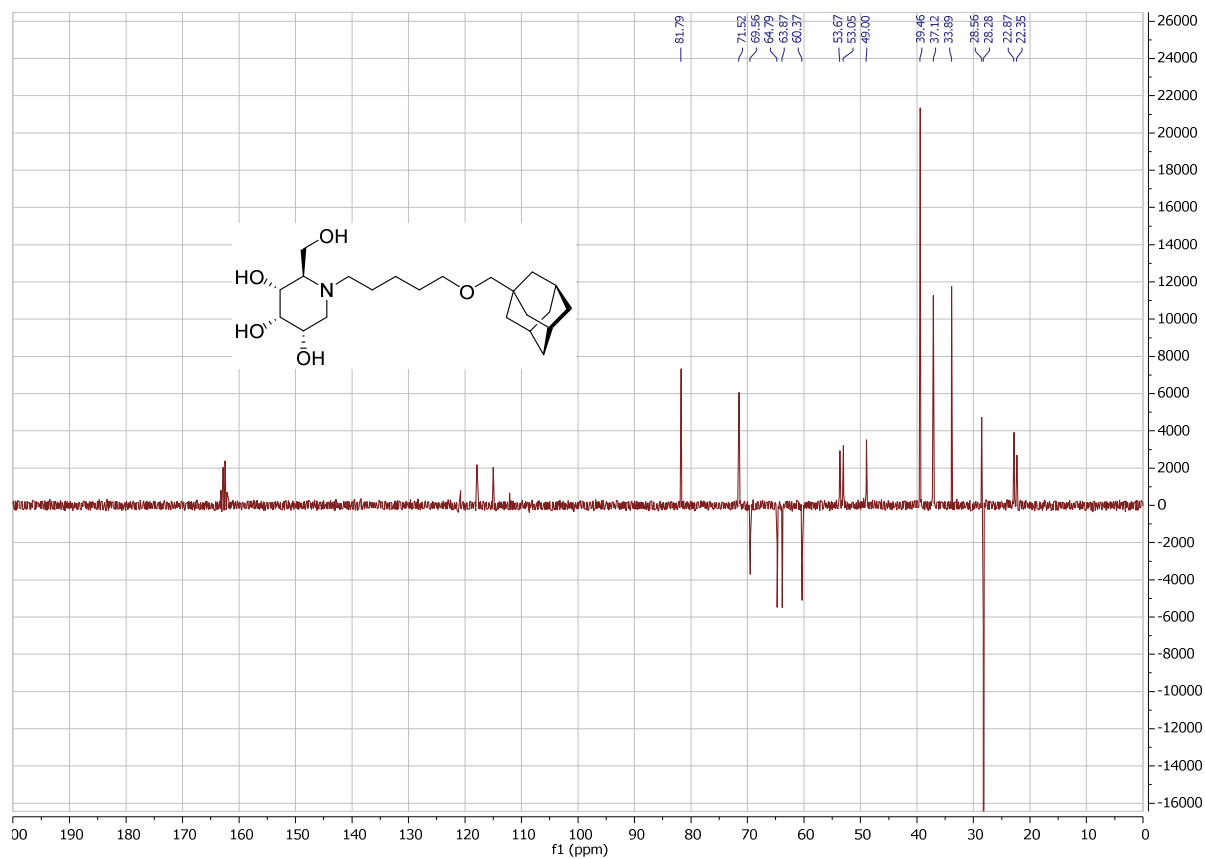

# $^1\text{H-NMR}$ and $^{13}\text{C-NMR}$ of compound C255.TFA in $\text{D}_2\text{O}$ .

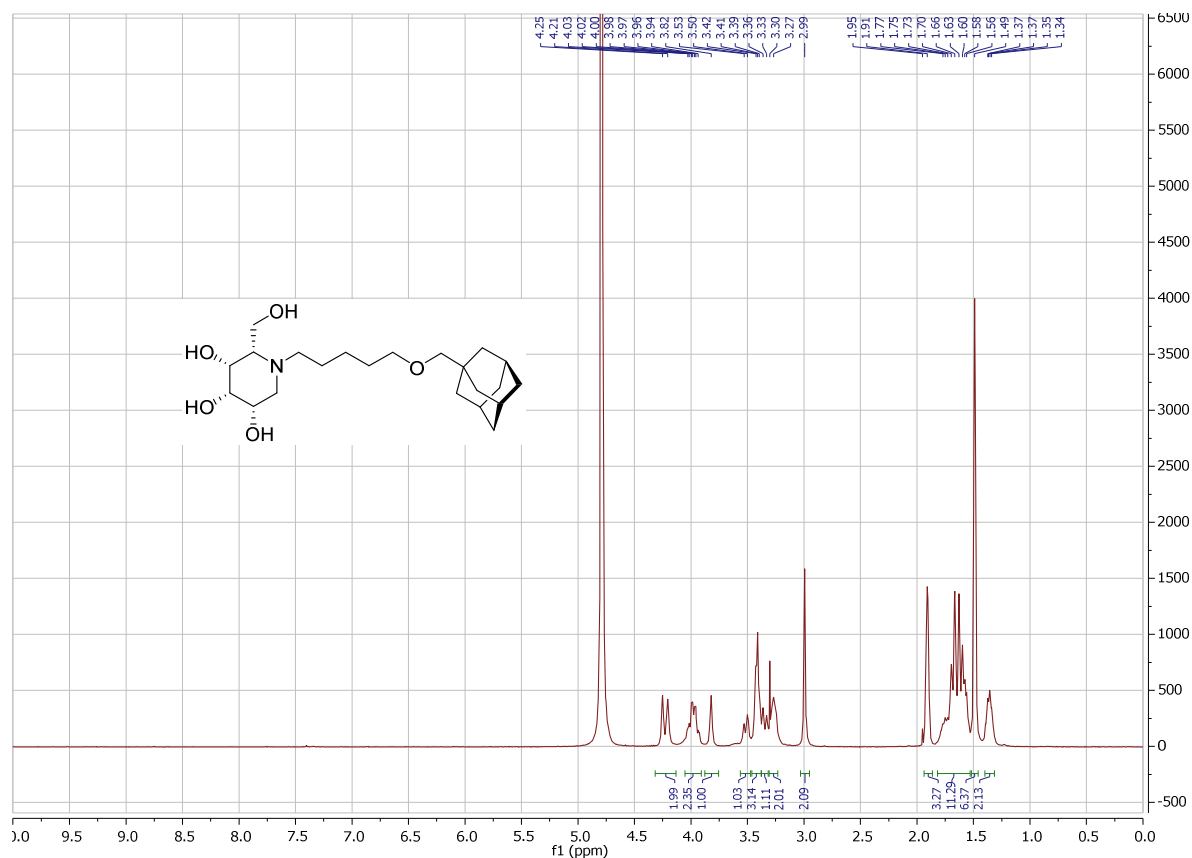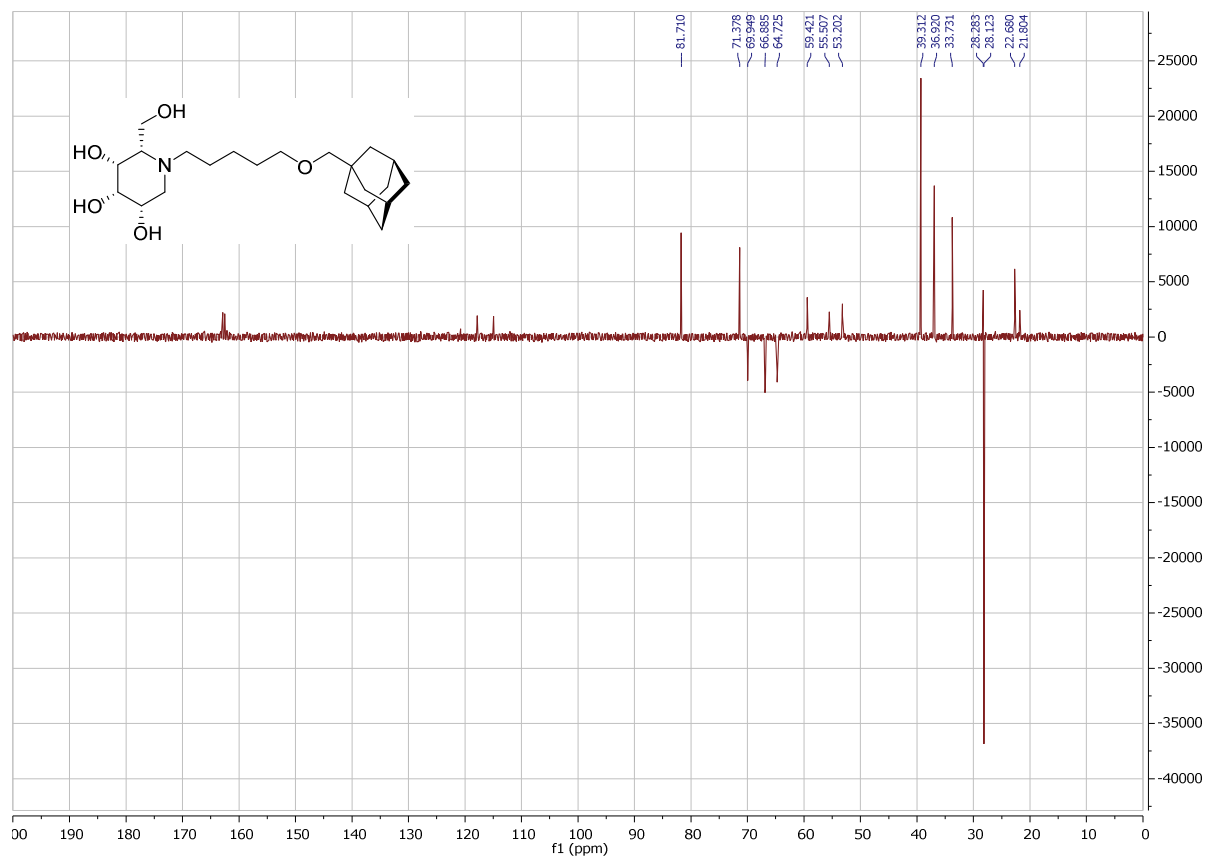

# $^1\text{H-NMR}$ and $^{13}\text{C-NMR}$ of compound C256.TFA in $\text{D}_2\text{O}$ .

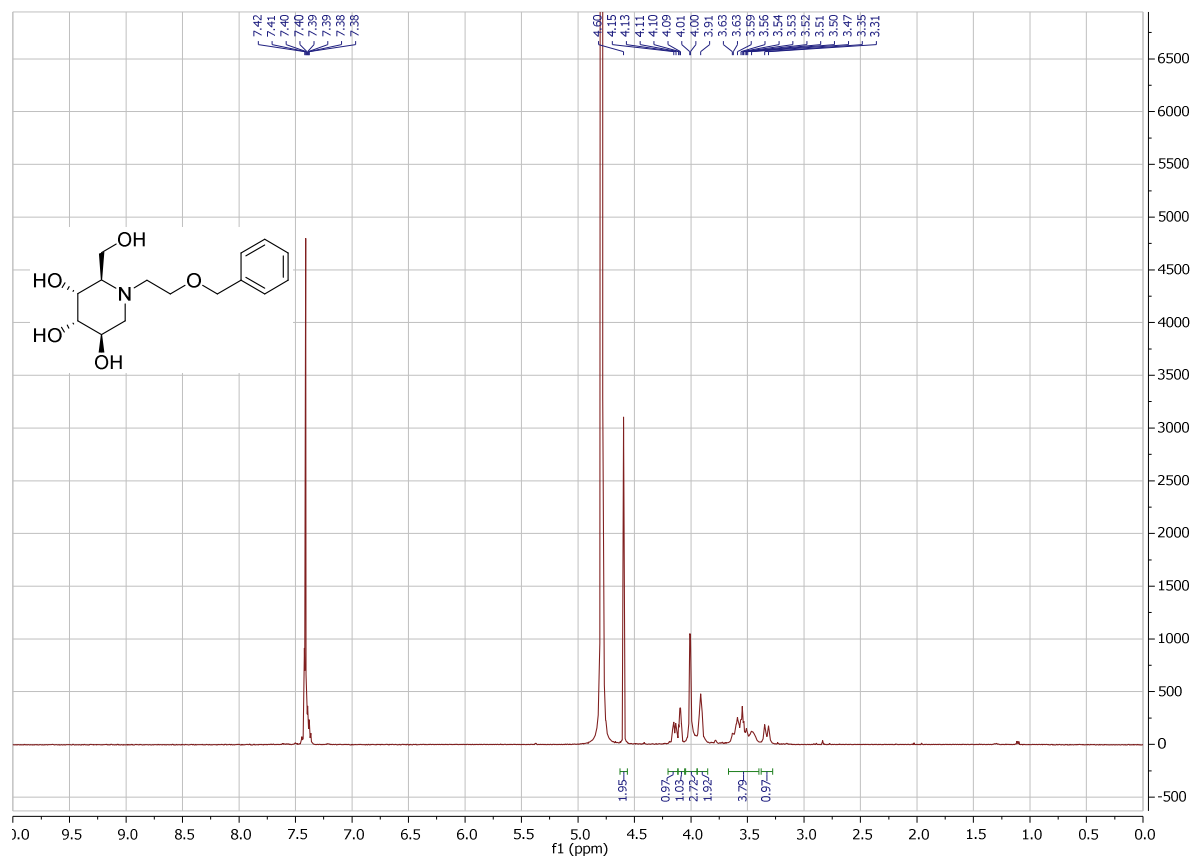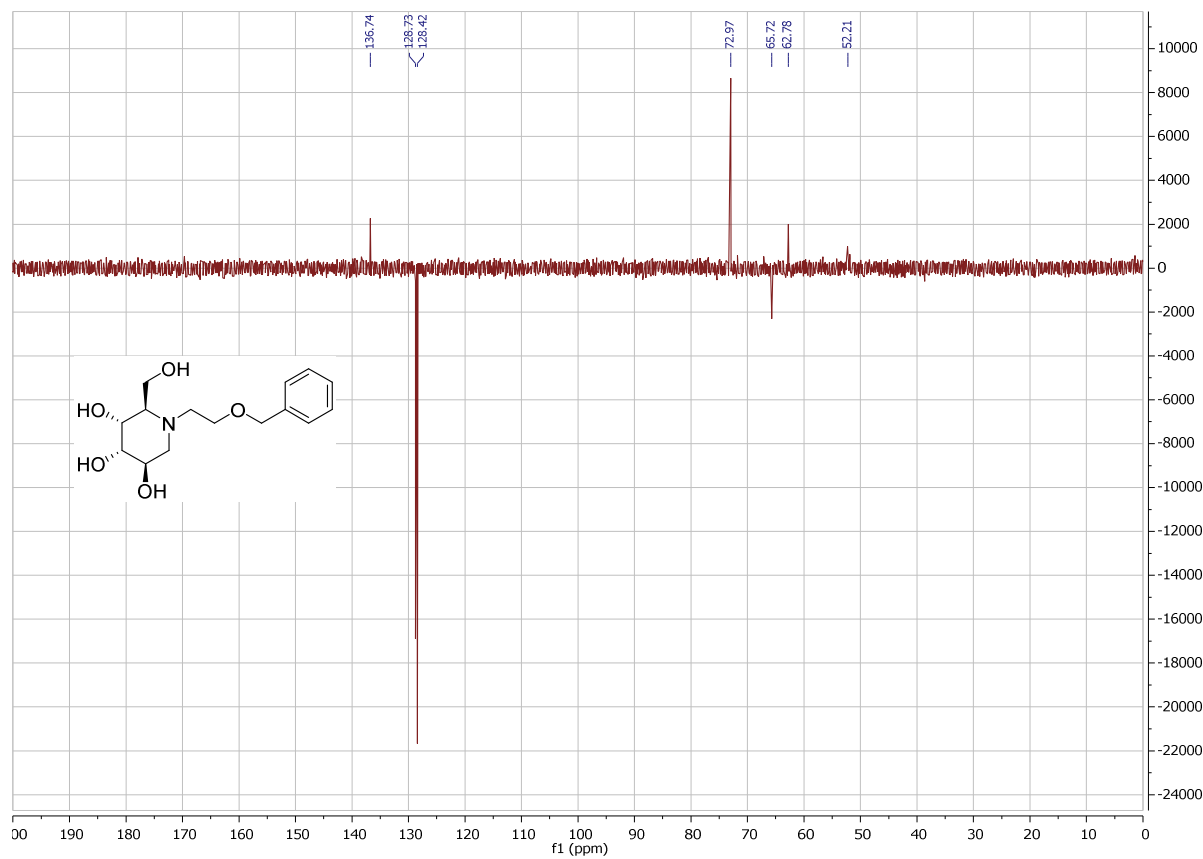

# $^1\text{H-NMR}$ and $^{13}\text{C-NMR}$ of compound C259.TFA in $\text{D}_2\text{O}$ .

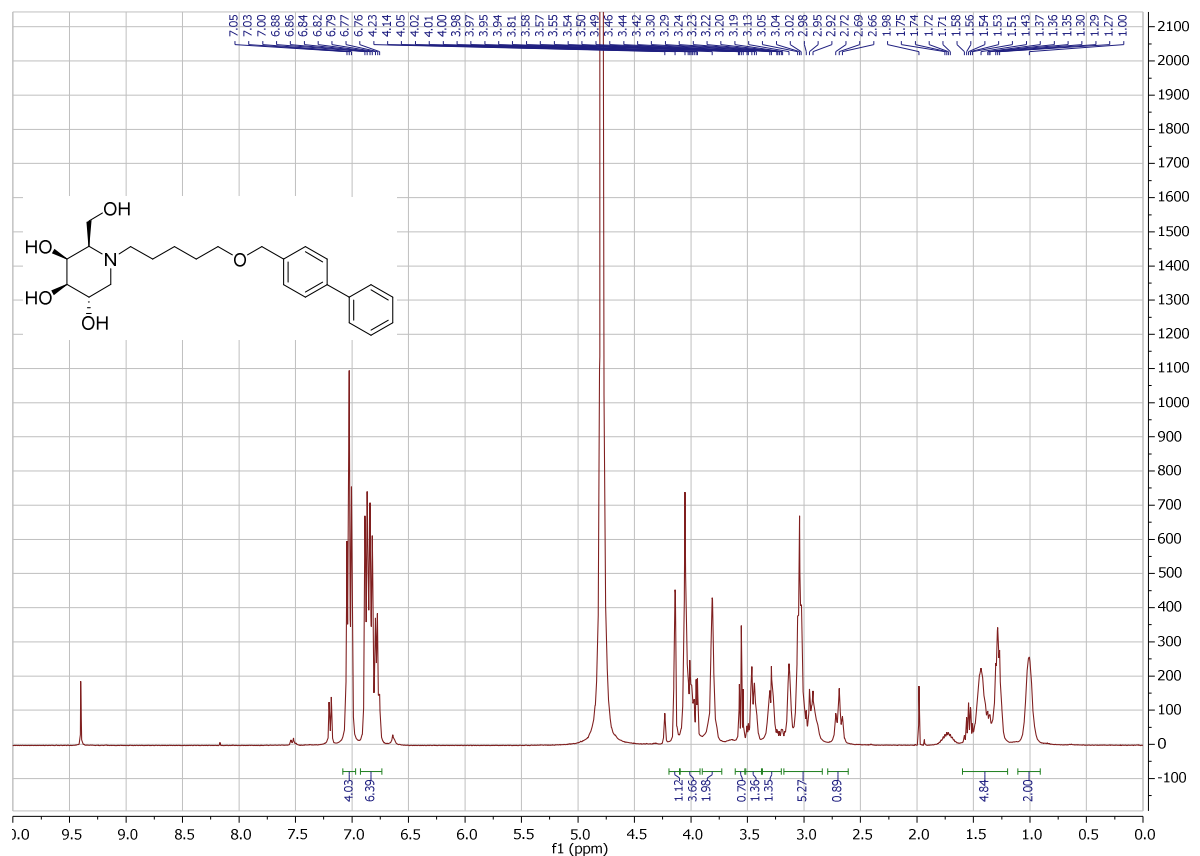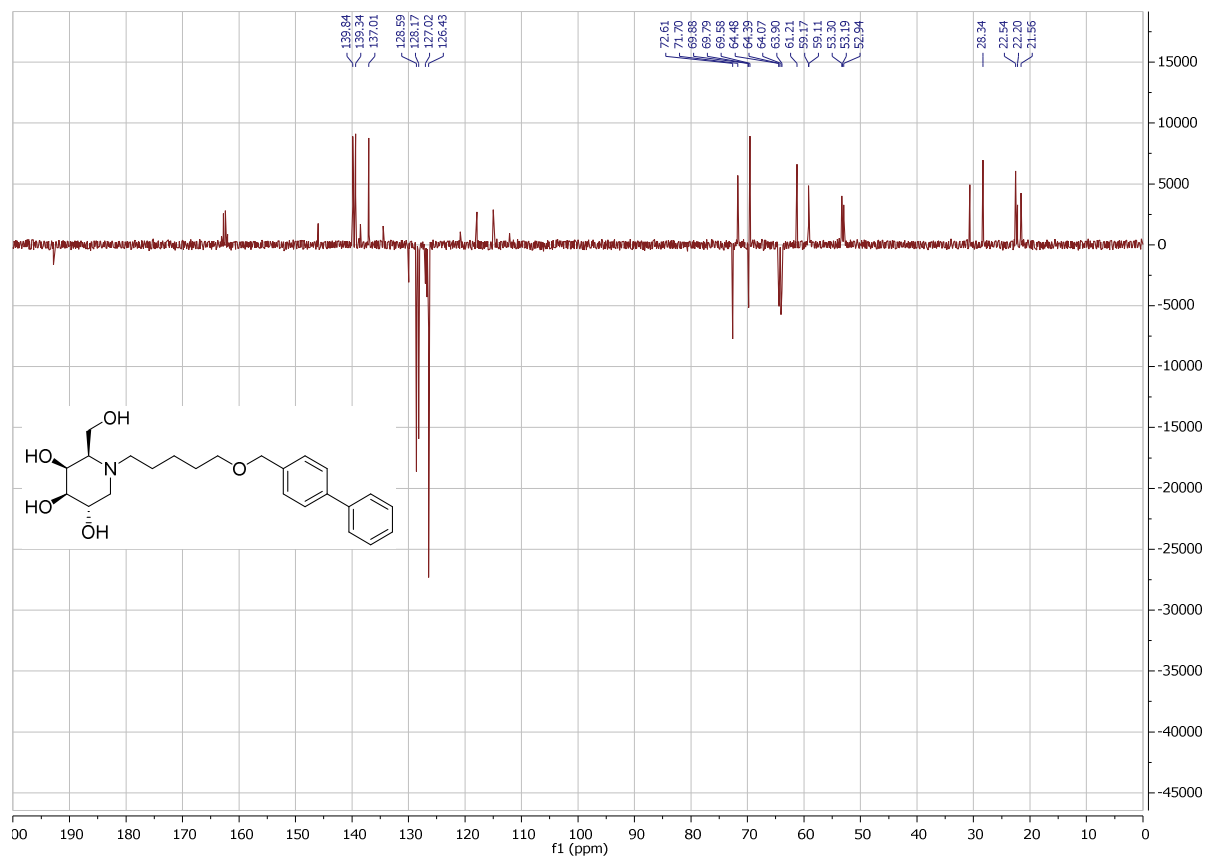



# $^1\text{H-NMR}$ and $^{13}\text{C-NMR}$ of compound C264.TFA in $\text{D}_2\text{O}$ .

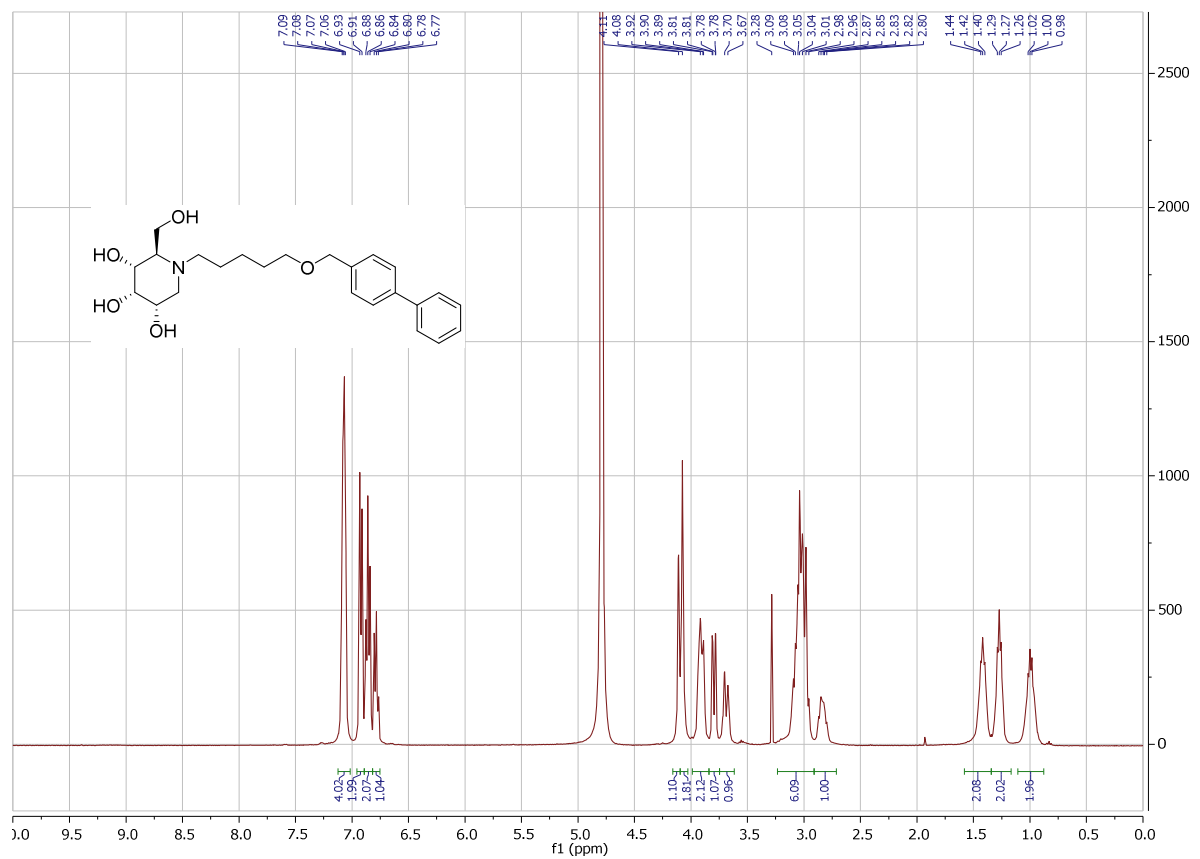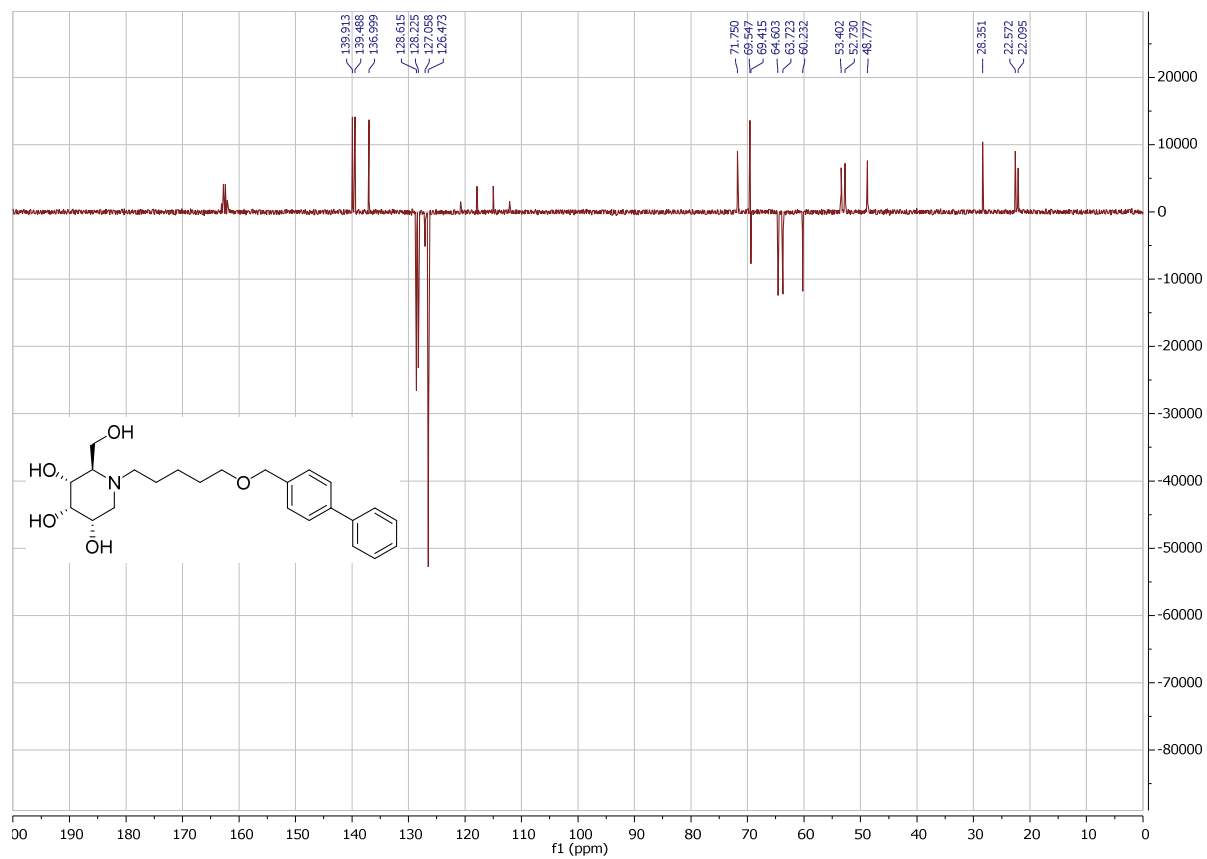

**$^1\text{H-NMR}$  and  $^{13}\text{C-NMR}$  of compound C266.TFA in MeOD.**

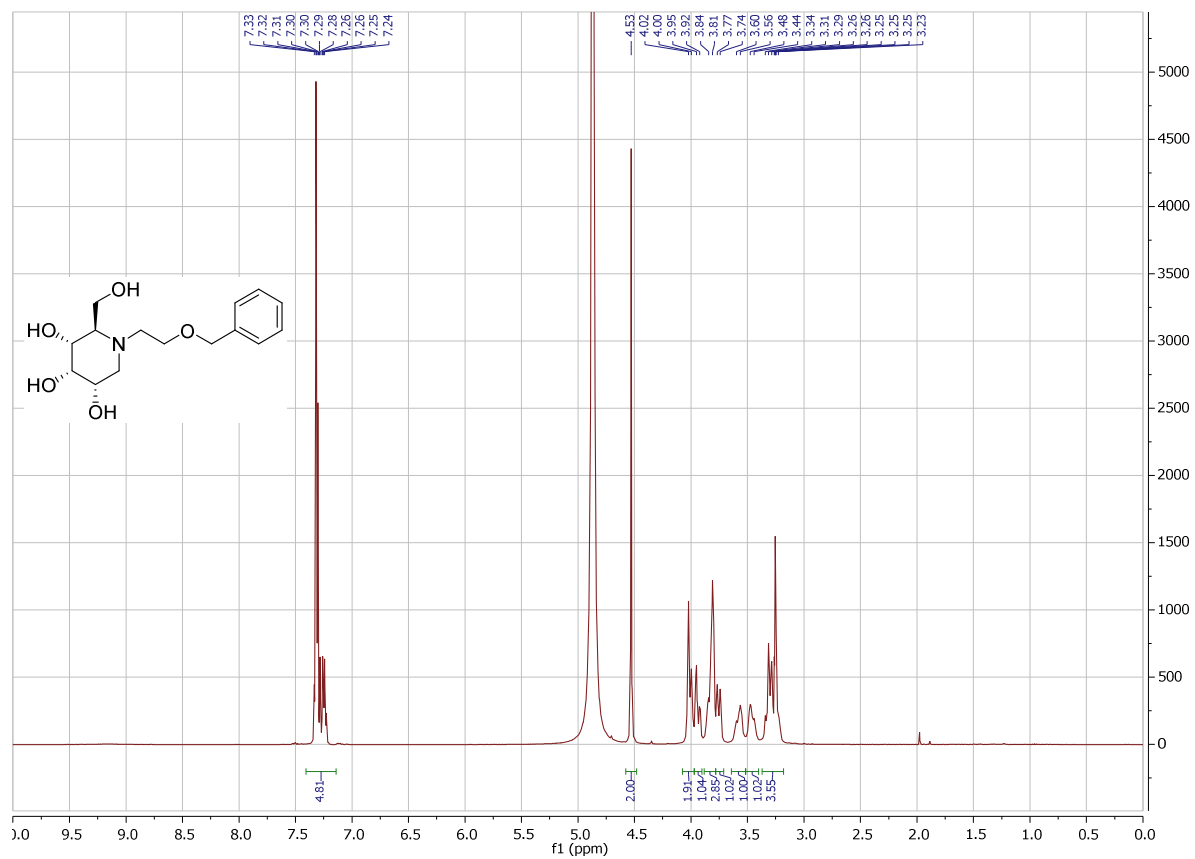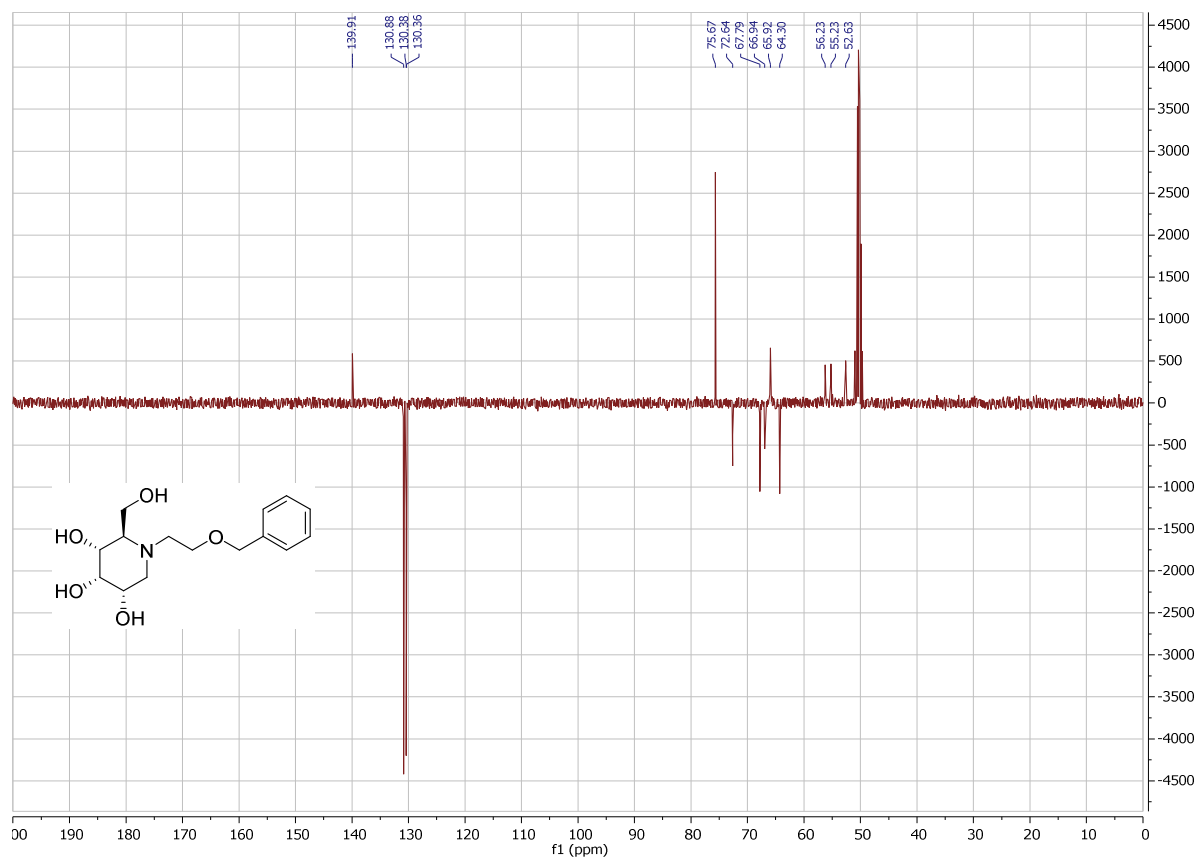

**<sup>1</sup>H-NMR and <sup>13</sup>C-NMR of compound C268.TFA in MeOD.**

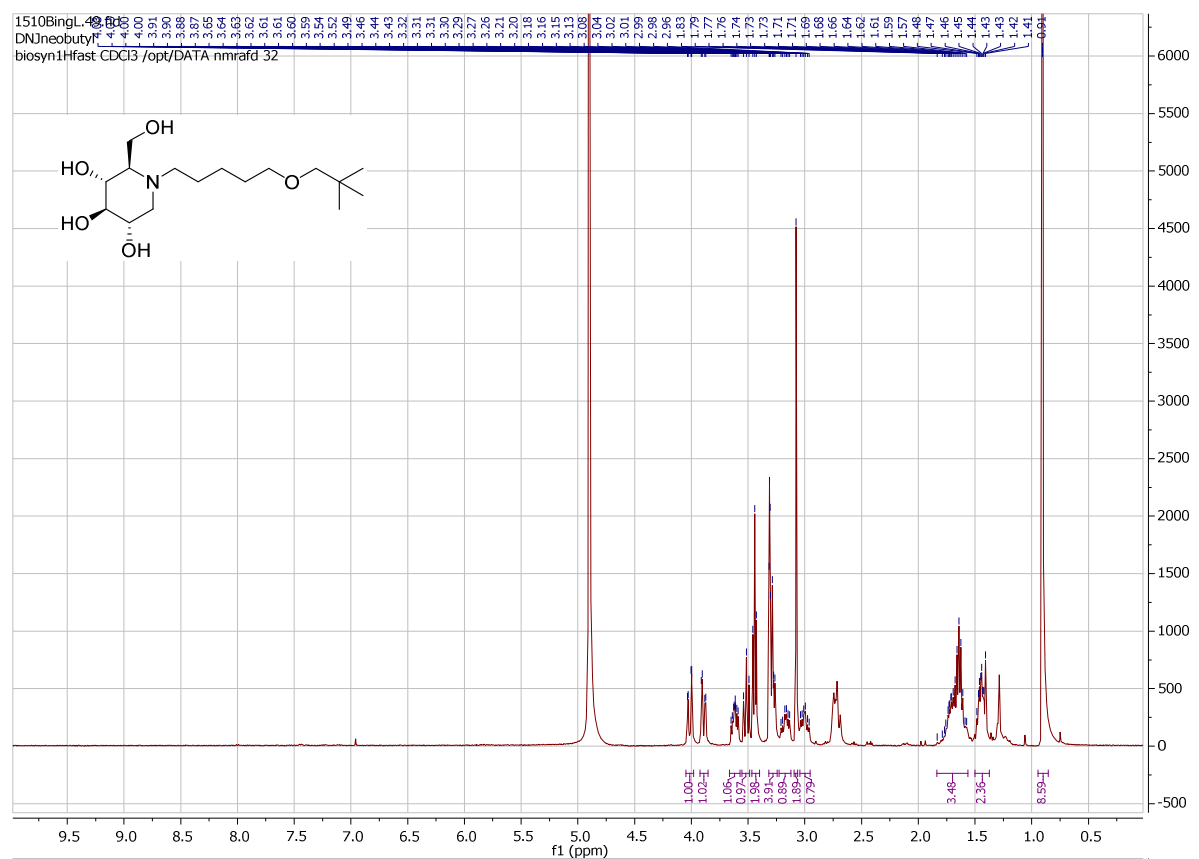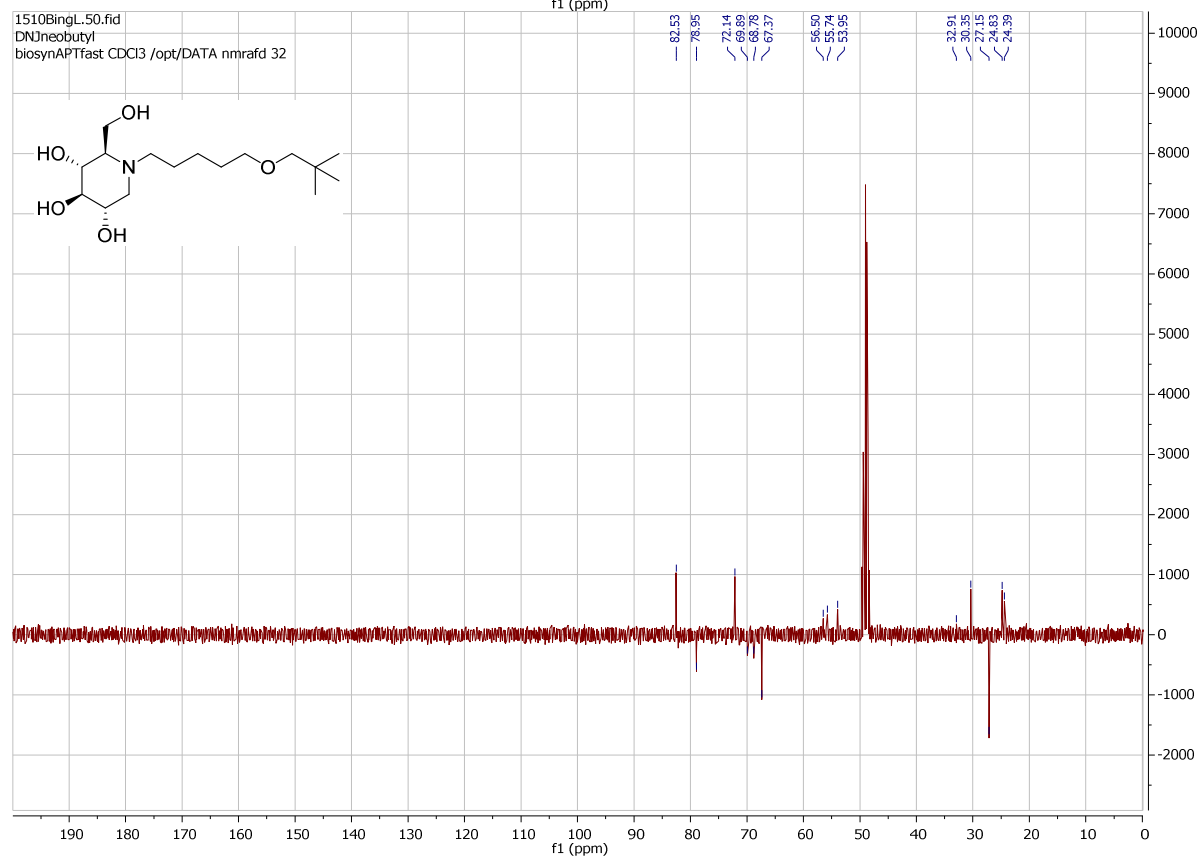

**<sup>1</sup>H-NMR and <sup>13</sup>C-NMR of compound C271.TFA in MeOD.**

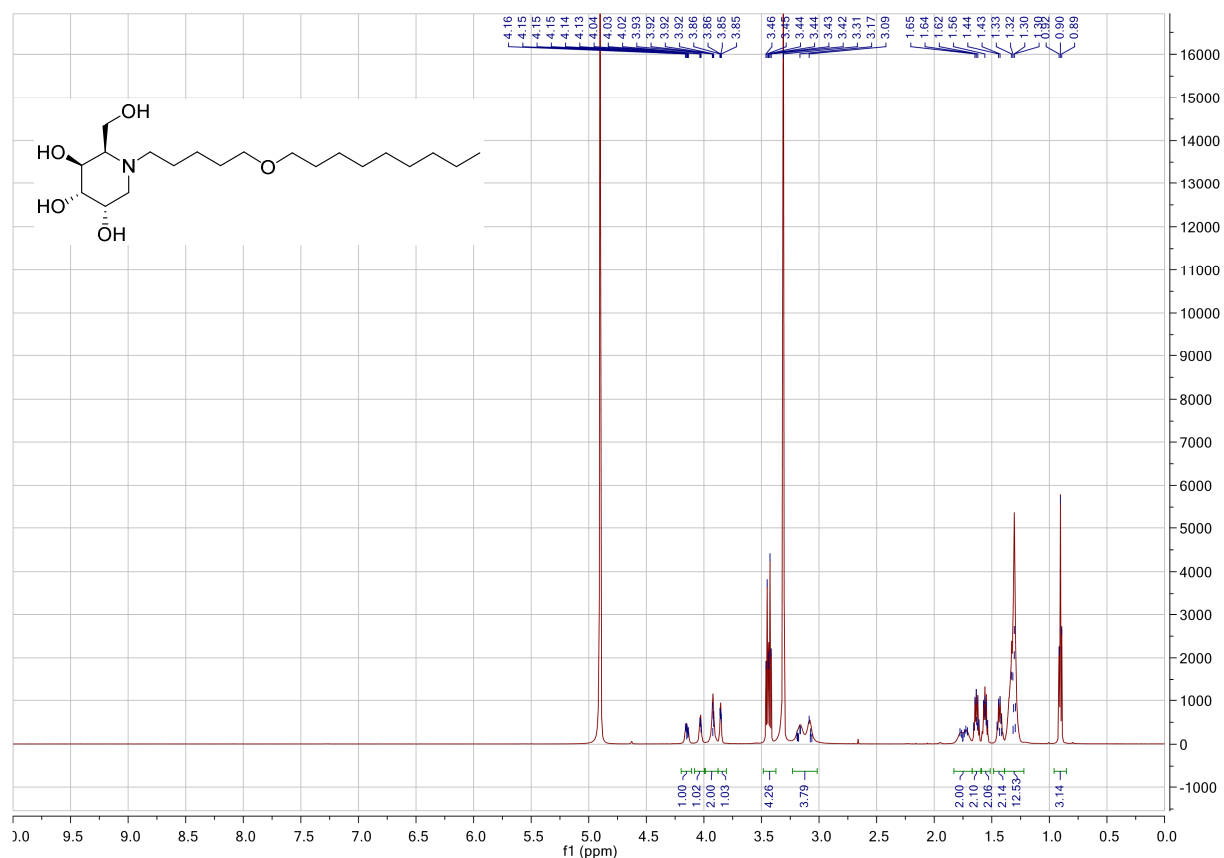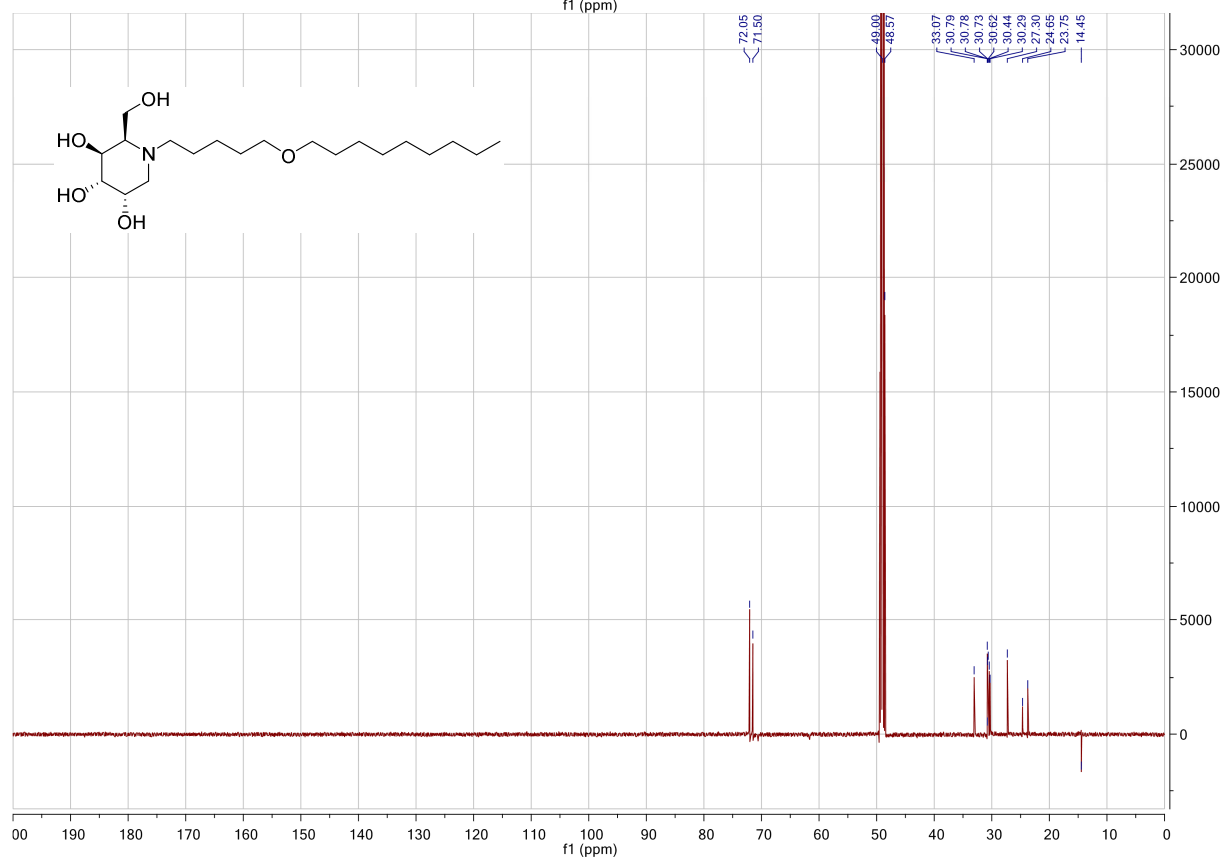

**<sup>1</sup>H-NMR and <sup>13</sup>C-NMR of compound C277.TFA in MeOD.**

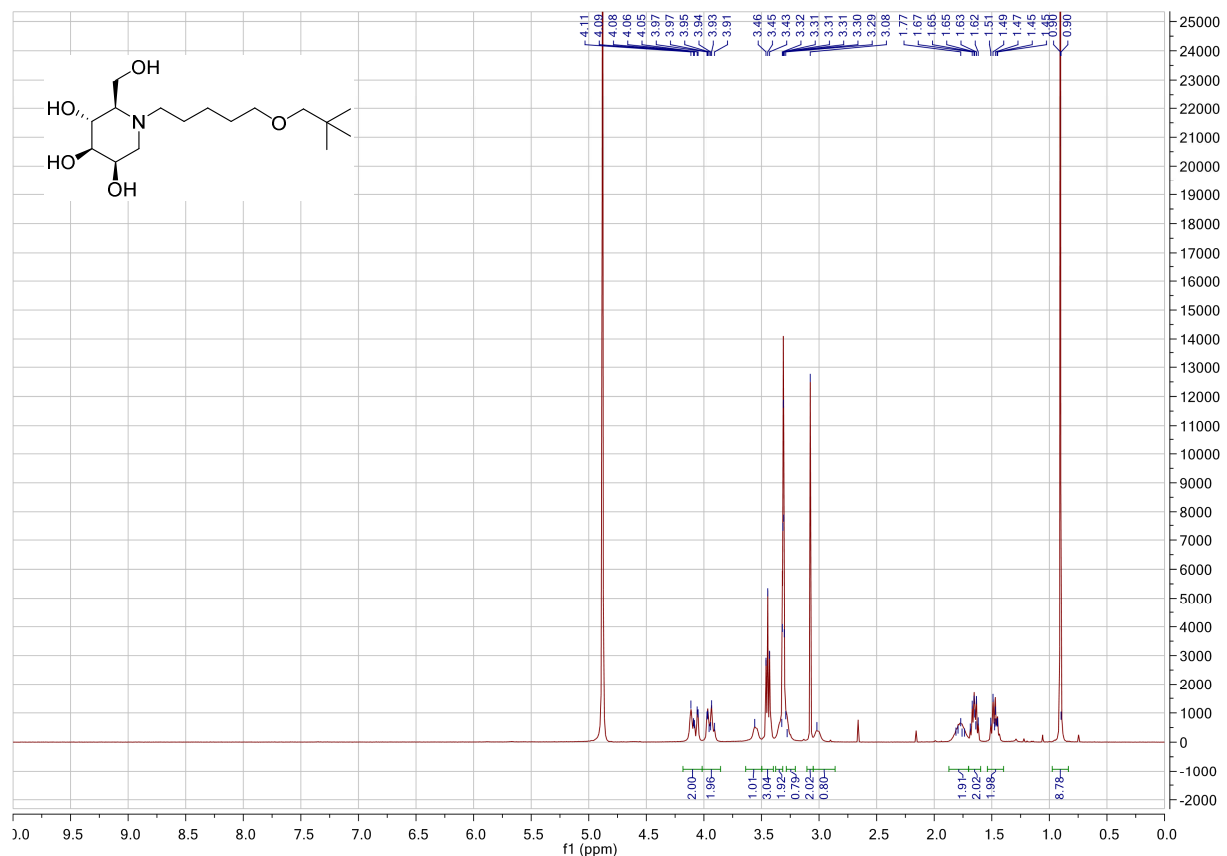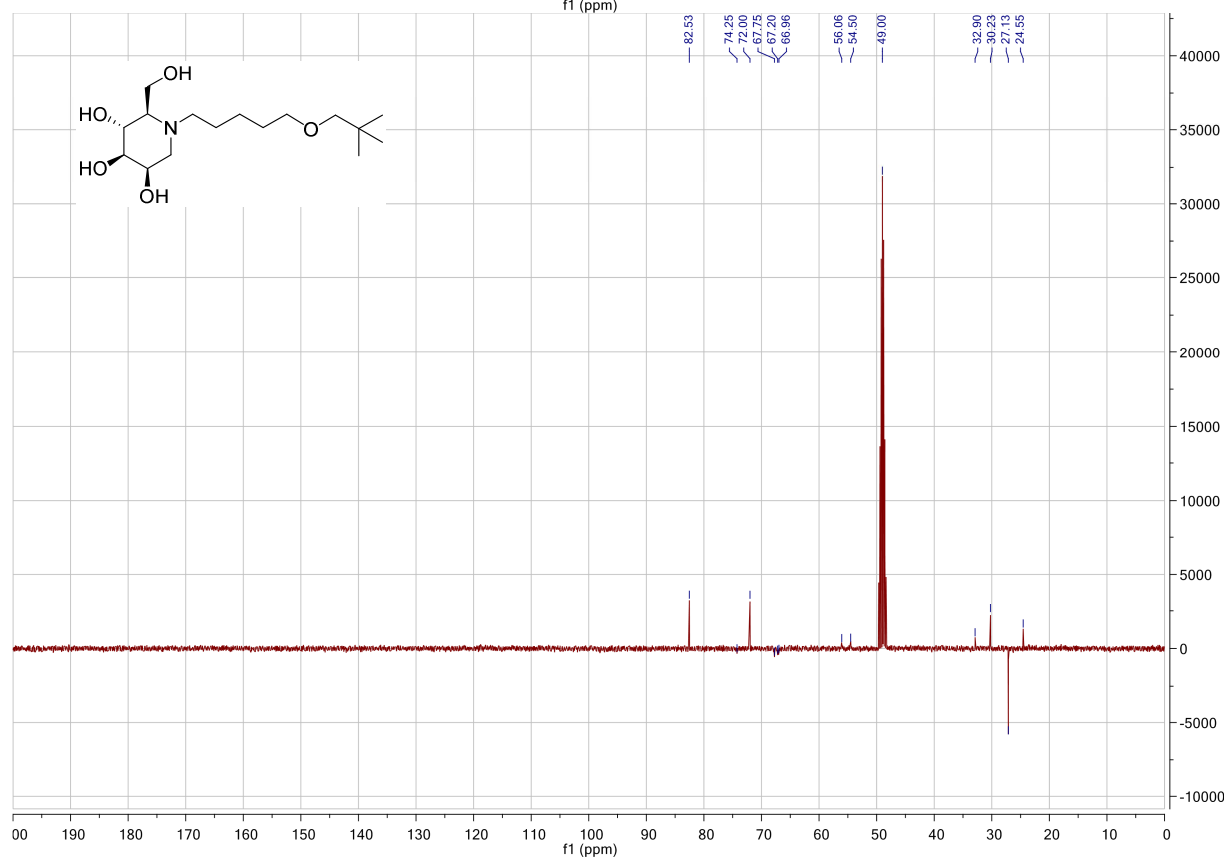



# $^1\text{H-NMR}$ and $^{13}\text{C-NMR}$ of compound C280.TFA in MeOD.

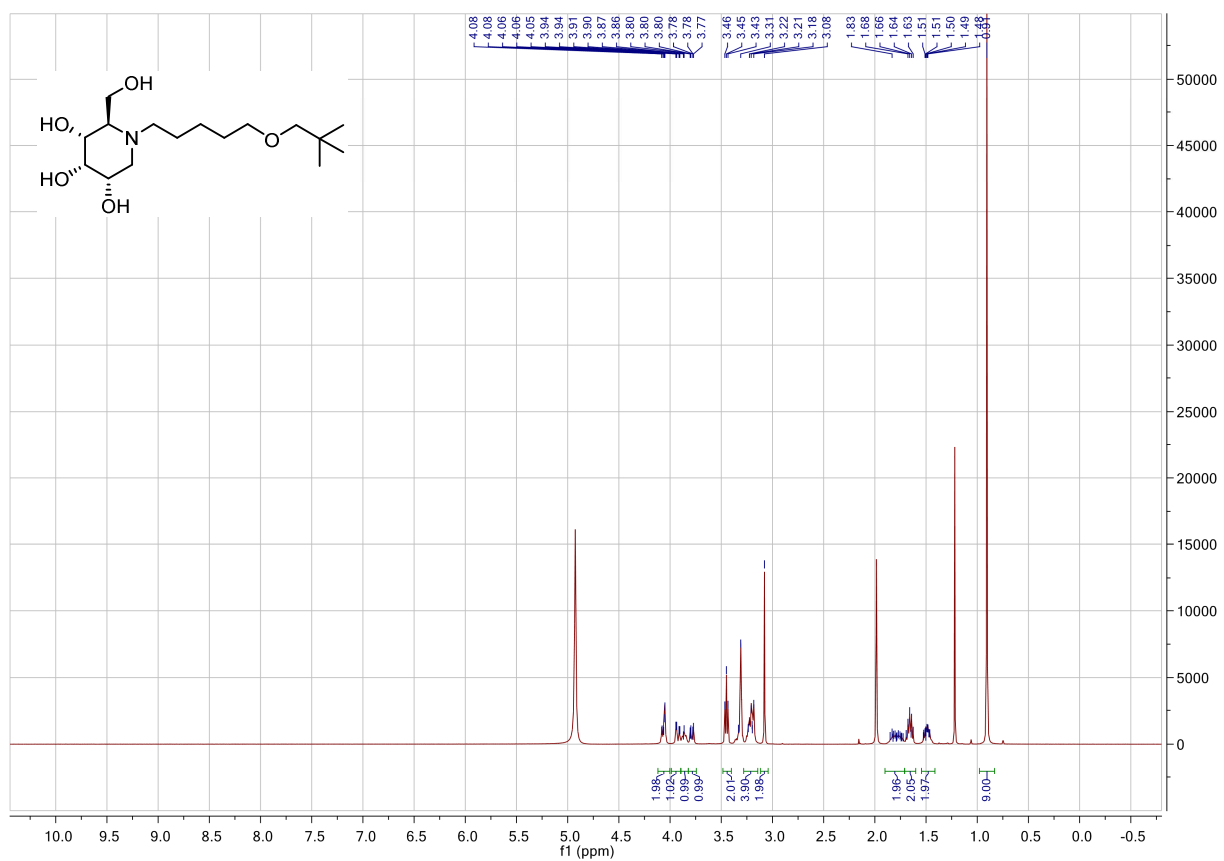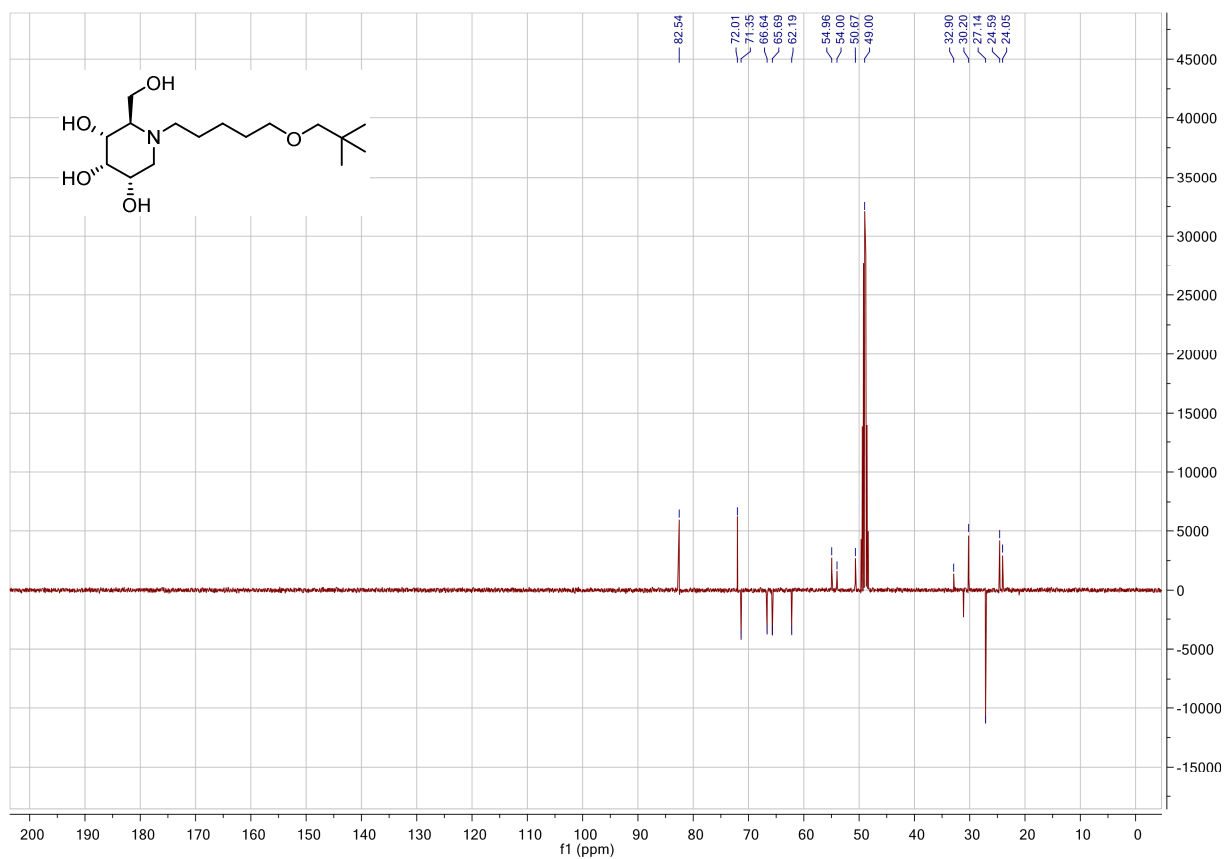

Supplement: ja7b07352_si_001.pdf [file ja7b07352_si_001.pdf]
